# Supplementary material for: Quantitative proteomics discloses monacolin K-induced alterations in triple-negative breast cancer cell proteomes and phosphoproteomes
Source: Royal Society of Chemistry journal article supplement (doi:10.1039/c9mo00140a), 2019-12-03
Supplement: c9mo00140a2.xlsx [file c9mo00140a2.xlsx]

## Sheet: Supplementary table 1_5408
Legend. Details of the proteins quantified. The main values correspond to the nomalised ration of each protein to the corresponding control (same time exposure, without the drug).
ST_MNK05_P1	ST_MNK5_P1	IT_MNK05_P1	IT_MNK5_P1	LT_MNK05_P1	LT_MNK5_P1	ST_MNK05_P2	ST_MNK5_P2	IT_MNK05_P2	IT_MNK5_P2	LT_MNK05_P2	LT_MNK5_P2	ST_MNK05_P3	ST_MNK5_P3	IT_MNK05_P3	IT_MNK5_P3	LT_MNK05_P3	LT_MNK5_P3	ST_MNK05_P4	ST_MNK5_P4	IT_MNK05_P4	IT_MNK5_P4	LT_MNK05_P4	LT_MNK5_P4	C: GOBP name	C: GOMF name	C: GOCC name	C: Keywords	C: KEGG name	SIGNIFICATIVE	N: Peptides	N: Razor + unique peptides	N: Unique peptides	N: Sequence coverage [%]	N: Unique + razor sequence coverage [%]	N: Unique sequence coverage [%]	N: Mol. weight [kDa]	N: Q-value	N: Score	N: Intensity	N: MS/MS count	N: Two-way ANOVA p value TIMEs	N: Two-way ANOVA p value CONCENTRATIONs	N: Two-way ANOVA p value Interaction	T: Protein IDs	T: Majority protein IDs	T: Protein names	T: Gene names
0.991872	1.02372	1.02505	1.02006	1.08112	1.16965	0.997074	1.01044	0.997009	0.987082	0.995529	1.08859	1.01777	1.0078	0.991919	1.00785	0.988821	1.06746	1.00771	1.01727	0.991909	1.01293	0.982541	1.06279	alcohol metabolic process;biological regulation;catabolic process;cellular catabolic process;cellular component organization;cellular component organization or biogenesis;cellular lipid metabolic process;cellular macromolecule catabolic process;cellular macromolecule metabolic process;cellular membrane organization;cellular metabolic process;cellular process;cellular response to stimulus;chemical…	binding;calcium ion binding;cargo receptor activity;cation binding;clathrin binding;clathrin heavy chain binding;glycoprotein binding;ion binding;lipoprotein particle binding;lipoprotein particle receptor activity;low-density lipoprotein particle binding;low-density lipoprotein receptor activity;metal ion binding;protein binding;protein-lipid complex binding;receptor activity;very-low-density lip…	apical part of cell;basolateral plasma membrane;cell part;cell surface;clathrin coated vesicle membrane;clathrin-coated endocytic vesicle membrane;coated pit;coated vesicle membrane;cytoplasmic part;cytoplasmic vesicle membrane;cytoplasmic vesicle part;early endosome;endocytic vesicle membrane;endosomal part;endosome;endosome membrane;external side of plasma membrane;extracellular region part;Gol…	3D-structure;Alternativesplicing;Cellmembrane;Cholesterolmetabolism;Coatedpit;Completeproteome;Directproteinsequencing;Diseasemutation;Disulfidebond;EGF-likedomain;Endocytosis;Endosome;Glycoprotein;Golgiapparatus;Host-virusinteraction;LDL;Lipidmetabolism;Lipidtransport;Lysosome;Membrane;Phosphoprotein;Polymorphism;Proteomicsidentification;Receptor;Referenceproteome;Repeat;Signal;Steroidmetabolism…	Bile secretion;Endocytosis;Hepatitis C;Toxoplasmosis	Keep	24	24	23	27.1	27.1	26.3	104.56	0	145.62	8436600000	132	0.00840342	0.0171824	0.0130728	J3KMZ9;P01130;P01130-3;P01130-4;P01130-5;H0YMD1;P01130-2;P01130-6;H0YM92;H0YMQ3	J3KMZ9;P01130;P01130-3;P01130-4;P01130-5;H0YMD1;P01130-2;P01130-6	Low-density lipoprotein receptor	LDLR
1.04062	1.0625	1.02396	1.01831	1.08757	1.18494	0.984882	1.01164	1.01269	0.987332	1.00918	1.13195	1.03226	1.02211	1.00549	1.02756	1.03511	1.1194	1.03476	1.08422	0.946542	0.963284	1.03083	1.09401	biological regulation;blood coagulation;cell communication;cell migration;cell motility;cell surface receptor linked signaling pathway;cell-cell signaling;cellular component movement;cellular macromolecule metabolic process;cellular metabolic process;cellular process;cellular protein metabolic process;cellular response to chemical stimulus;cellular response to corticosteroid stimulus;cellular res…	catalytic activity;endopeptidase activity;hydrolase activity;peptidase activity;peptidase activity, acting on L-amino acid peptides;serine hydrolase activity;serine-type endopeptidase activity;serine-type peptidase activity	apical part of cell;cell part;cell surface;cytoplasm;cytoplasmic membrane-bounded vesicle;cytoplasmic part;cytoplasmic vesicle;extracellular membrane-bounded organelle;extracellular organelle;extracellular region;extracellular region part;extracellular space;extracellular vesicular exosome;intracellular membrane-bounded organelle;intracellular organelle;intracellular part;membrane-bounded organel…	3D-structure;Alternativesplicing;Cleavageonpairofbasicresidues;Completeproteome;Directproteinsequencing;Disulfidebond;EGF-likedomain;Glycoprotein;Hydrolase;Kringle;Pharmaceutical;Plasminogenactivation;Polymorphism;Protease;Proteomicsidentification;Referenceproteome;Repeat;Secreted;Serineprotease;Signal;Zymogen	Complement and coagulation cascades	Keep	8	8	8	14.9	14.9	14.9	62.916	0	15.632	550120000	20	0.000255054	0.016748	0.016135	P00750;P00750-3;B4DNJ1;B4DN26;E7ESF4;P00750-2;P00750-4;H0YBH9;E5RHG4;E5RGA1	P00750;P00750-3;B4DNJ1;B4DN26;E7ESF4;P00750-2;P00750-4	Tissue-type plasminogen activator;Tissue-type plasminogen activator chain A;Tissue-type plasminogen activator chain B	PLAT
0.982513	1.02983	0.992398	1.01445	1.11929	1.21336	1.00286	1.00514	0.991025	0.985782	1.00758	1.13781	1.03085	1.00731	0.984813	1.01011	0.926136	1.07559	1.01677	1.01735	0.992084	1.01268	1.02618	1.07124	aging;anatomical structure development;biological regulation;cellular component disassembly;cellular component disassembly at cellular level;cellular component organization;cellular component organization at cellular level;cellular component organization or biogenesis;cellular component organization or biogenesis at cellular level;cellular process;cellular response to chemical stimulus;cellular r…	binding;cation binding;endopeptidase inhibitor activity;endopeptidase regulator activity;enzyme activator activity;enzyme binding;enzyme inhibitor activity;enzyme regulator activity;ion binding;metal ion binding;metalloendopeptidase inhibitor activity;metalloenzyme inhibitor activity;metalloenzyme regulator activity;peptidase inhibitor activity;peptidase regulator activity;protease binding;protei…	basement membrane;cell body;cell part;cell projection part;cell surface;extracellular matrix;extracellular matrix part;extracellular membrane-bounded organelle;extracellular organelle;extracellular region;extracellular region part;extracellular space;extracellular vesicular exosome;growth cone;membrane-bounded organelle;membrane-bounded vesicle;neuronal cell body;organelle;proteinaceous extracell…	3D-structure;Completeproteome;Directproteinsequencing;Disulfidebond;Metal-binding;Metalloenzymeinhibitor;Metalloproteaseinhibitor;Proteaseinhibitor;Proteomicsidentification;Referenceproteome;Secreted;Signal;Zinc		Keep	6	6	6	27.3	27.3	27.3	24.399	0	8.7682	476970000	11	0.00860733	0.0362847	0.0331909	P16035;B4DFW2;K7EIX4	P16035;B4DFW2;K7EIX4	Metalloproteinase inhibitor 2	TIMP2
0.994457	1.03795	0.968085	0.941552	1.08964	1.13386	1.04098	1.03457	1.00232	0.967206	1.03158	1.1758	1.00886	1.00411	1.0008	1.04289	1.04222	1.08476	1.02241	1.07927	0.985812	0.993472	0.928826	0.987851	anatomical structure development;biological regulation;blood coagulation;calcium ion homeostasis;cation homeostasis;cell activation;cell activation involved in immune response;cell development;cell differentiation;cell migration;cell motility;cell proliferation;cell surface receptor linked signaling pathway;cellular calcium ion homeostasis;cellular cation homeostasis;cellular chemical homeostasis…	binding;G-protein alpha-subunit binding;G-protein beta-subunit binding;G-protein coupled receptor activity;molecular transducer activity;peptide binding;peptide receptor activity;peptide receptor activity, G-protein coupled;protein binding;receptor activity;receptor binding;signal transducer activity;signaling receptor activity;thrombin receptor activity;transmembrane signaling receptor activity	cell part;cell projection;cytoplasmic part;early endosome;endosome;Golgi apparatus;integral to membrane;integral to plasma membrane;intracellular membrane-bounded organelle;intracellular organelle;intracellular part;intrinsic to membrane;intrinsic to plasma membrane;membrane;membrane part;membrane-bounded organelle;organelle;plasma membrane;plasma membrane part;pseudopodium	Cellmembrane;Completeproteome;Disulfidebond;Glycoprotein;G-proteincoupledreceptor;Immunity;Inflammatoryresponse;Innateimmunity;Lipoprotein;Membrane;Palmitate;Phosphoprotein;Polymorphism;Receptor;Referenceproteome;Signal;Transducer;Transmembrane;Transmembranehelix;Ublconjugation	African trypanosomiasis;Neuroactive ligand-receptor interaction	Keep	2	2	2	3.3	3.3	3.3	44.126	0	7.6236	228700000	9	0.00463928	0.053374	0.0451348	P55085	P55085	Proteinase-activated receptor 2;Proteinase-activated receptor 2, alternate cleaved 1;Proteinase-activated receptor 2, alternate cleaved 2	F2RL1
0.98304	1.00945	1.06691	1.08112	1.1026	1.52908	1.00257	1.02005	1.01235	1.01577	1.04104	1.24892	1.02416	1.01094	1.00585	1.04343	0.985261	1.24045	1.02534	1.02275	0.978298	1.03861	0.988122	1.19703	anatomical structure formation involved in morphogenesis;angiogenesis;apoptosis;axon guidance;biological adhesion;biological regulation;blood coagulation;cell activation;cell adhesion;cell death;cellular process;cellular response to abiotic stimulus;cellular response to chemical stimulus;cellular response to hydrogen peroxide;cellular response to ionizing radiation;cellular response to oxidative …	binding;catalytic activity;GDP binding;GTP binding;GTPase activity;guanyl nucleotide binding;guanyl ribonucleotide binding;hydrolase activity;hydrolase activity, acting on acid anhydrides;hydrolase activity, acting on acid anhydrides, in phosphorus-containing anhydrides;nucleoside-triphosphatase activity;nucleotide binding;purine nucleotide binding;purine ribonucleoside triphosphate binding;purin…	adherens junction;anchoring junction;cell division site part;cell junction;cell part;cell-substrate adherens junction;cell-substrate junction;cleavage furrow;cytoplasmic part;cytosol;early endosome;endosomal part;endosome;endosome membrane;extracellular membrane-bounded organelle;extracellular organelle;extracellular region part;extracellular vesicular exosome;focal adhesion;intracellular membran…	3D-structure;ADP-ribosylation;Angiogenesis;Apoptosis;Celladhesion;Cellmembrane;Completeproteome;Developmentalprotein;Differentiation;Directproteinsequencing;Endosome;GTP-binding;Lipoprotein;Membrane;Methylation;Nucleotide-binding;Nucleus;Palmitate;Phosphoprotein;Prenylation;Proteintransport;Referenceproteome;Transport;Tumorsuppressor		Keep	5	4	4	25	16.3	16.3	22.123	0	22.04	858520000	16	0.000619233	0.0022671	0.000467282	P62745	P62745	Rho-related GTP-binding protein RhoB	RHOB
0.981114	0.998203	1.13091	1.12764	1.04187	1.21851	0.885539	1.03077	1.02281	1.04157	0.891968	1.28742	1.04245	1.02817	0.980543	0.994662	0.93312	0.983644	1.0128	0.973208	1.00951	1.02702	0.931296	1.02205	biological regulation;biosynthetic process;cellular biosynthetic process;cellular component organization;cellular component organization at cellular level;cellular component organization or biogenesis;cellular component organization or biogenesis at cellular level;cellular macromolecule biosynthetic process;cellular macromolecule metabolic process;cellular metabolic process;cellular nitrogen comp…	binding;chromatin binding;histone acetyl-lysine binding;histone binding;protein binding	cell part;intracellular membrane-bounded organelle;intracellular organelle;intracellular part;membrane-bounded organelle;nucleus;organelle	3D-structure;Acetylation;Alternativesplicing;Bromodomain;Chromatinregulator;Chromosomalrearrangement;Coiledcoil;Completeproteome;Nucleus;Phosphoprotein;Polymorphism;Referenceproteome;Repeat;Transcription;Transcriptionregulation		Keep	10	4	4	12.4	5.9	5.9	79.541	0	7.6357	370820000	8	0.395382	0.0311081	0.0430521	Q15059;Q15059-2	Q15059;Q15059-2	Bromodomain-containing protein 3	BRD3
0.98576	1.01722	0.994548	0.978846	1.01755	1.08814	0.99907	1.01406	1.00577	0.995657	0.999285	1.05307	1.02415	1.017	1.00301	1.01467	0.914826	1.01732	1.00539	1.01253	0.96403	0.980374	0.997213	1.00917			cell part;intracellular membrane-bounded organelle;intracellular non-membrane-bounded organelle;intracellular organelle;intracellular organelle part;intracellular part;membrane;membrane-bounded organelle;non-membrane-bounded organelle;nuclear part;nucleolus;nucleus;organelle;organelle part;plasma membrane	Completeproteome;Phosphoprotein;Polymorphism;Referenceproteome		Keep	10	10	10	41.4	41.4	41.4	29.647	0	87.243	1775700000	46	0.279506	0.0368674	0.0435185	Q15527	Q15527	Surfeit locus protein 2	SURF2
1.02246	1.04561	1.06187	0.993768	1.03456	1.1165	1.00663	1.02726	1.02143	1.01484	1.006	1.15524	1.03943	1.02225	1.00722	1.01936	0.957671	0.998053	1.02597	1.02244	0.973432	0.984504	0.94058	0.982192	biological regulation;biosynthetic process;cellular biosynthetic process;cellular macromolecule metabolic process;cellular metabolic process;cellular nitrogen compound metabolic process;cellular process;gene expression;macromolecule metabolic process;metabolic process;nitrogen compound metabolic process;nucleic acid metabolic process;nucleobase-containing compound metabolic process;primary metabo…	protein binding transcription factor activity;transcription coactivator activity;transcription cofactor activity;transcription factor binding transcription factor activity	cell part;intracellular organelle part;intracellular part;macromolecular complex;mediator complex;nuclear part;nucleoplasm;nucleoplasm part;organelle part;protein complex;transcription factor complex	Activator;Alternativesplicing;Completeproteome;Directproteinsequencing;Diseasemutation;Mentalretardation;Nucleus;Proteomicsidentification;Referenceproteome;Transcription;Transcriptionregulation		Keep	5	5	5	3.2	3.2	3.2	157.11	0	36.222	132800000	11	0.547025	0.0944038	0.0196676	Q5JWT2;Q9ULK4-4;Q9ULK4-5;Q9ULK4-3;Q9ULK4;Q9ULK4-2;Q9ULK4-6	Q5JWT2;Q9ULK4-4;Q9ULK4-5;Q9ULK4-3;Q9ULK4;Q9ULK4-2	Mediator of RNA polymerase II transcription subunit 23	MED23
0.974661	1.00528	1.06315	1.03201	1.0221	0.968865	1.02952	1.03629	0.985967	0.983323	1.03315	0.979341	1.07163	1.06311	1.00783	1.01469	1.12038	0.977057	0.999091	1.01389	0.987334	0.988956	1.06091	1.05309	biological regulation;biosynthetic process;cell differentiation;cell maturation;cellular biosynthetic process;cellular component organization;cellular component organization at cellular level;cellular component organization or biogenesis;cellular component organization or biogenesis at cellular level;cellular developmental process;cellular macromolecule biosynthetic process;cellular macromolecule…		cell part;intracellular membrane-bounded organelle;intracellular organelle;intracellular part;membrane-bounded organelle;nucleus;organelle	3D-structure;Alternativesplicing;Chromatinregulator;Completeproteome;Nucleus;Phosphoprotein;Polymorphism;Referenceproteome;Repeat;Transcription;Transcriptionregulation		Keep	1	1	1	1.9	1.9	1.9	85.756	0	21.544	88863000	4	0.562093	0.100944	0.0321592	Q96JM7-2;Q96JM7	Q96JM7-2;Q96JM7	Lethal(3)malignant brain tumor-like protein 3	L3MBTL3
0.930035	0.934324	1.03797	1.01941	1.07757	1.17773	1.01848	0.987998	0.971303	0.934183	1.05187	1.15562	1.01807	1.04039	1.00118	0.993629	0.918646	1.06796	1.00796	0.968333	1.0134	1.02049	1.0277	1.03695	activation of caspase activity;apoptosis;biological regulation;cell death;cellular process;cellular response to stimulus;death;defense response;defense response to bacterium;immune response;immune system process;innate immune response;intracellular receptor mediated signaling pathway;multi-organism process;neuron apoptosis;neuron death;nucleotide-binding domain, leucine rich repeat containing rec…	adenyl nucleotide binding;adenyl ribonucleotide binding;apoptotic protease activator activity;ATP binding;binding;caspase activator activity;caspase regulator activity;enzyme activator activity;enzyme binding;enzyme regulator activity;nucleotide binding;peptidase activator activity;peptidase regulator activity;protein binding;protein domain specific binding;purine nucleotide binding;purine ribonu…	cell part;cytoplasmic part;cytosol;intracellular;intracellular membrane-bounded organelle;intracellular organelle;intracellular part;macromolecular complex;membrane-bounded organelle;NALP1 inflammasome complex;nucleus;organelle;protein complex	3D-structure;Alternativesplicing;Apoptosis;ATP-binding;Completeproteome;Cytoplasm;Diseasemutation;Ectodermaldysplasia;Immunity;Inflammatoryresponse;Innateimmunity;Leucine-richrepeat;Nucleotide-binding;Nucleus;Polymorphism;Referenceproteome;Repeat	NOD-like receptor signaling pathway	Keep	2	2	1	5.6	5.6	2.9	46.068	0.0032699	1.7546	1726800000	22	0.0116071	0.311899	0.0337433	Q9C000-7;Q9C000-6	Q9C000-7;Q9C000-6	NACHT, LRR and PYD domains-containing protein 1	NLRP1
1.01626	1.05654	1.1156	1.04667	1.13092	1.13384	1.0065	1.01217	1.0109	1.00367	0.994153	1.16041	1.01249	1.01046	0.983411	1.00753	0.934407	0.989306	1.02455	1.05058	0.951821	0.98224	1.10219	1.0068	activation of immune response;activation of innate immune response;activation of MAPK activity;activation of MAPKK activity;activation of protein kinase activity;aging;anaphase-promoting complex-dependent proteasomal ubiquitin-dependent protein catabolic process;anatomical structure development;anatomical structure morphogenesis;apoptosis;axon guidance;biological regulation;biosynthetic process;c…	adenyl nucleotide binding;adenyl ribonucleotide binding;ATP binding;binding;catalytic activity;cyclin-dependent protein kinase activity;histone kinase activity;kinase activity;nucleotide binding;phosphotransferase activity, alcohol group as acceptor;protein kinase activity;protein serine/threonine kinase activity;purine nucleotide binding;purine ribonucleoside triphosphate binding;purine ribonucl…	cell part;centrosome;cytoplasm;cytoplasmic part;cytoskeletal part;cytosol;extracellular membrane-bounded organelle;extracellular organelle;extracellular region part;extracellular vesicular exosome;intracellular membrane-bounded organelle;intracellular non-membrane-bounded organelle;intracellular organelle;intracellular organelle part;intracellular part;macromolecular complex;membrane;membrane-bou…	3D-structure;Acetylation;Alternativesplicing;Apoptosis;ATP-binding;Cellcycle;Celldivision;Completeproteome;Cytoplasm;Cytoskeleton;Isopeptidebond;Kinase;Mitochondrion;Mitosis;Nucleotide-binding;Nucleus;Phosphoprotein;Polymorphism;Proteomicsidentification;Referenceproteome;Serine/threonine-proteinkinase;Transferase;Ublconjugation	Cell cycle;Gap junction;Oocyte meiosis;p53 signaling pathway;Progesterone-mediated oocyte maturation		11	10	9	43.1	40.4	36.7	34.081	0	75.346	4818100000	80	0.261992	0.492621	0.637601	A0A024QZP7;A0A087WY43;P06493;P06493-2;A0A087WZZ9;E5RIU6;K7ELV5;Q00526;G3V317	A0A024QZP7;A0A087WY43;P06493;P06493-2;A0A087WZZ9	Cyclin-dependent kinase 1	CDC2;CDK1
0.991751	1.0245	1.09353	1.03842	1.08558	1.08083	0.999562	1.01435	1.00446	1.00438	1.0074	1.13097	1.01137	1.00047	0.986111	1.01158	0.955351	0.989212	1.01826	1.02238	0.975555	0.996233	1.07291	1.01069	biological regulation;cellular process;cellular response to abiotic stimulus;cellular response to osmotic stress;cellular response to stimulus;cellular response to stress;multicellular organismal process;negative regulation of catalytic activity;negative regulation of endopeptidase activity;negative regulation of hydrolase activity;negative regulation of molecular function;negative regulation of …	binding;endopeptidase inhibitor activity;endopeptidase regulator activity;enzyme binding;enzyme inhibitor activity;enzyme regulator activity;peptidase inhibitor activity;peptidase regulator activity;protease binding;protein binding;serine-type endopeptidase inhibitor activity	cell part;cytoplasm;cytoplasmic part;cytosol;extracellular membrane-bounded organelle;extracellular organelle;extracellular region part;extracellular space;extracellular vesicular exosome;intracellular part;macromolecular complex;membrane-bounded organelle;membrane-bounded vesicle;organelle;protein complex;vesicle	Acetylation;Completeproteome;Cytoplasm;Deafness;Directproteinsequencing;Non-syndromicdeafness;Polymorphism;Proteaseinhibitor;Proteomicsidentification;Referenceproteome;Serineproteaseinhibitor	Amoebiasis		15	15	14	40	40	37.9	43.024	0	72.497	8571600000	135	0.247907	0.526819	0.681097	A0A024QZX5;A0A087X1N8;P35237	A0A024QZX5;A0A087X1N8;P35237	Serpin B6	SERPINB6
0.972594	1.00285	1.07131	1.03133	1.07177	1.07942	1.0074	1.01141	1.00025	0.997909	1.01619	1.08046	1.01726	1.00999	0.993724	1.00906	0.966196	0.993172	1.00478	0.993483	0.985407	1.00778	1.02743	1.00586	alcohol metabolic process;cholesterol metabolic process;establishment of localization;lipid metabolic process;lipid transport;metabolic process;organic substance transport;primary metabolic process;small molecule metabolic process;steroid metabolic process;sterol metabolic process;transport	binding;lipid binding;nucleic acid binding;RNA binding	cell part;cytoplasm;extracellular region part;high-density lipoprotein particle;intracellular membrane-bounded organelle;intracellular organelle;intracellular part;macromolecular complex;membrane;membrane-bounded organelle;nucleus;organelle;plasma lipoprotein particle;plasma membrane;protein-lipid complex	3D-structure;Acetylation;Alternativesplicing;Cholesterolmetabolism;Completeproteome;Cytoplasm;Directproteinsequencing;HDL;Lipidmetabolism;Lipidtransport;Lipoprotein;Nucleus;Phosphoprotein;Polymorphism;Proteomicsidentification;Referenceproteome;Repeat;RNA-binding;Steroidmetabolism;Sterolmetabolism;Transport			50	50	50	39.4	39.4	39.4	141.44	0	199.89	27677000000	299	0.190541	0.530583	0.600624	A0A024R4E5;Q00341;Q00341-2;H0Y394;H7C0A4;H7BZC3;C9J5E5;C9JIZ1;H7C2D1;C9JHS7;C9JHZ8;C9JES8;C9JZI8;C9JT62;C9JK79;C9JBS3;C9JEJ8;C9JHN6;C9JQ82;C9JMQ6;H7C3D0;C9JHS9;C9J739	A0A024R4E5;Q00341;Q00341-2;H0Y394	Vigilin	HDLBP
0.974767	0.993331	1.03679	1.02783	1.04442	1.06945	1.01331	1.01322	0.994947	0.981152	1.01087	1.01787	1.02538	1.01702	0.996105	1.00482	0.985041	0.997755	1.0066	0.989692	1.00087	1.01629	0.971003	0.999735	biological regulation;biosynthetic process;cellular biosynthetic process;cellular macromolecule biosynthetic process;cellular macromolecule metabolic process;cellular metabolic process;cellular nitrogen compound metabolic process;cellular process;cellular protein metabolic process;gene expression;macromolecule biosynthetic process;macromolecule metabolic process;macromolecule modification;metabol…	binding;DNA binding;nucleic acid binding;RNA binding;translation elongation factor activity;translation factor activity, nucleic acid binding	cell part;cytoplasm;elongin complex;extracellular region part;extracellular space;integral to membrane;intracellular membrane-bounded organelle;intracellular organelle;intracellular organelle part;intracellular part;intrinsic to membrane;macromolecular complex;membrane part;membrane-bounded organelle;nuclear part;nucleoplasm;nucleoplasm part;nucleus;organelle;organelle part;protein complex;transc…	3D-structure;Acetylation;Completeproteome;Elongationfactor;Nucleus;Phosphoprotein;Polymorphism;Proteinbiosynthesis;Proteomicsidentification;Referenceproteome;Transcription;Transcriptionregulation			20	20	20	21.8	21.8	21.8	87.229	0	77.336	3132300000	56	0.748906	0.523323	0.514421	A0A024RAC6;Q14241	A0A024RAC6;Q14241	Transcription elongation factor B polypeptide 3	TCEB3
0.980514	1.04332	1.10015	1.05024	1.08703	1.06508	0.999448	1.01112	0.991072	0.985653	0.994479	1.13843	1.02151	1.01557	0.991392	1.00357	0.923318	0.976934	1.01855	1.0317	0.959664	0.994374	1.15379	1.03994	activation of caspase activity;activation of caspase activity by cytochrome c;apoptosis;biological regulation;cell death;cellular process;death;induction of apoptosis;induction of apoptosis by extracellular signals;induction of apoptosis by intracellular signals;induction of apoptosis by oxidative stress;induction of apoptosis via death domain receptors;induction of programmed cell death;neuron a…		CD40 receptor complex;cell part;cytoplasmic part;cytosol;internal side of plasma membrane;intracellular membrane-bounded organelle;intracellular organelle;intracellular organelle part;intracellular part;macromolecular complex;membrane part;membrane-bounded organelle;membrane-enclosed lumen;mitochondrial intermembrane space;mitochondrial part;mitochondrion;organelle;organelle envelope lumen;organe…	3D-structure;Alternativesplicing;Apoptosis;Completeproteome;Deafness;Directproteinsequencing;Diseasemutation;Mitochondrion;Non-syndromicdeafness;Proteomicsidentification;Referenceproteome;Transitpeptide;Ublconjugation			6	6	6	41	41	41	18.919	0	73.083	2226400000	26	0.416236	0.681408	0.906261	A0A024RBT2;Q9NR28-2;Q9NR28;F5H796;Q9NR28-3;F5GXT8;F5GYH3;F5GX50;F5H0Q4;H7BZK7;H7BZQ7	A0A024RBT2;Q9NR28-2;Q9NR28;F5H796;Q9NR28-3;F5GXT8;F5GYH3;F5GX50	Diablo homolog, mitochondrial	DIABLO
0.958539	0.997372	0.986019	1.00511	1.07307	1.07586	1.10546	1.10332	0.987371	0.961974	1.02092	0.88708	1.03254	1.02594	1.01526	1.00384	1.07678	1.02172	1.00655	1.02694	0.968157	0.99853	0.891798	0.947882	biological regulation;biosynthetic process;cellular biosynthetic process;cellular macromolecule biosynthetic process;cellular macromolecule metabolic process;cellular metabolic process;cellular nitrogen compound metabolic process;cellular process;macromolecule biosynthetic process;macromolecule metabolic process;metabolic process;nitrogen compound metabolic process;nucleic acid metabolic process;…		cell part;intracellular membrane-bounded organelle;intracellular organelle;intracellular part;membrane-bounded organelle;nucleus;organelle	Acetylation;Alternativesplicing;Completeproteome;Nucleus;Phosphoprotein;Polymorphism;Proteomicsidentification;Referenceproteome;Transcription;Transcriptionregulation			6	6	6	24.5	24.5	24.5	30.929	0	28.103	564330000	19	0.401591	0.986907	0.862337	A0A075B6E4;Q14135;G5E9M9;A0A0A6YYI5;G5E9M7;Q14135-2;Q14135-4;F8W708;E7EQU6;E7EWF5;Q14135-5;Q14135-6;E7EUJ2;E7ERW0;C9JX59;C9JBN2;F8WBN7;A0A096LP98;Q14135-3	A0A075B6E4;Q14135;G5E9M9;A0A0A6YYI5;G5E9M7;Q14135-2;Q14135-4;F8W708;E7EQU6;E7EWF5;Q14135-5;Q14135-6;E7EUJ2;E7ERW0	Transcription cofactor vestigial-like protein 4	VGLL4
0.972597	1.00261	1.0839	1.04284	1.08467	1.09903	1.00177	1.0057	1.00459	0.996158	1.00993	1.07815	1.0165	1.00137	0.98451	1.00819	0.95918	0.991258	1.01967	1.00874	0.974973	1.00623	1.02458	1.0084	biological regulation;biosynthetic process;catabolic process;cellular biosynthetic process;cellular catabolic process;cellular component assembly;cellular component assembly at cellular level;cellular component biogenesis;cellular component biogenesis at cellular level;cellular component disassembly;cellular component disassembly at cellular level;cellular component organization;cellular componen…	binding;nucleic acid binding;nucleotide binding;structural constituent of ribosome;structural molecule activity	adherens junction;anchoring junction;cell junction;cell part;cell-substrate adherens junction;cell-substrate junction;cytoplasmic part;cytosol;cytosolic small ribosomal subunit;extracellular membrane-bounded organelle;extracellular organelle;extracellular region part;extracellular vesicular exosome;focal adhesion;intracellular non-membrane-bounded organelle;intracellular organelle;intracellular o…	3D-structure;Completeproteome;Diamond-Blackfananemia;Directproteinsequencing;Phosphoprotein;Polymorphism;Referenceproteome;Ribonucleoprotein;Ribosomalprotein	Ribosome		12	12	12	53.7	53.7	53.7	15.919	0	68.733	34195000000	177	0.284979	0.519243	0.60791	H0YN88;A0A075B716;P0CW22;P08708;H0YN73;H3BNC9	H0YN88;A0A075B716;P0CW22;P08708	40S ribosomal protein S17-like;40S ribosomal protein S17	RPS17;RPS17L
0.929633	0.9748	1.07157	1.01766	1.05989	1.05882	0.999685	1.0009	0.99669	1.00657	1.00053	1.00907	1.02091	1.02116	0.991005	1.01895	1.00737	0.98473	1.01625	0.978458	1.01844	1.02815	0.998071	1.04593			cell part;cytoplasm;cytoskeleton;intracellular non-membrane-bounded organelle;intracellular organelle;intracellular part;non-membrane-bounded organelle;organelle	Coiledcoil;Completeproteome;Cytoplasm;Cytoskeleton;Directproteinsequencing;Phosphoprotein;Proteomicsidentification;Referenceproteome;Repeat			51	41	41	29	21.4	21.4	553.12	0	175.83	8669400000	160	0.21155	0.991273	0.990835	A0A075B730;A0A087X1U6;P58107	A0A075B730;A0A087X1U6;P58107	Epiplakin	EPPK1
0.949443	0.979959	0.97471	0.989094	1.09197	1.09647	1.00923	1.0064	0.986581	0.964876	0.991592	0.931309	1.01787	1.00678	1.01193	1.01323	1.02313	1.0161	1.01525	0.988096	1.00701	1.03315	0.930875	1.00085		binding;calcium ion binding;cation binding;DNA binding;ion binding;metal ion binding;nucleic acid binding	cell part;cytoplasmic part;cytosol;endoplasmic reticulum;endoplasmic reticulum-Golgi intermediate compartment;envelope;extracellular membrane-bounded organelle;extracellular organelle;extracellular region part;extracellular space;extracellular vesicular exosome;Golgi apparatus;intracellular membrane-bounded organelle;intracellular organelle;intracellular organelle part;intracellular part;membrane…	Alternativesplicing;Calcium;Cleavageonpairofbasicresidues;Completeproteome;Cytoplasm;Directproteinsequencing;DNA-binding;Endoplasmicreticulum;Golgiapparatus;Membrane;Metal-binding;Nucleus;Phosphoprotein;Polymorphism;Proteomicsidentification;Referenceproteome;Repeat;Secreted;Signal			21	20	20	50.2	48.6	48.6	50.222	0	127.06	11654000000	104	0.777707	0.936567	0.979718	V9HW75;A0A087WSV8;P80303-2;P80303;Q2L696;E9PKG6;E9PLR0;E9PLE9;H0YEG8;E9PM22;E9PJP3;H0YD18	V9HW75;A0A087WSV8;P80303-2;P80303;Q2L696;E9PKG6	Nucleobindin-2;Nesfatin-1	HEL-S-109;NUCB2;Nucb2
1.0008	1.04027	1.09102	1.04104	1.05867	1.07318	1.00876	1.01858	1.00611	1.00199	1.00672	1.12575	1.01905	1.0119	0.997605	1.01185	0.984752	0.993086	1.00782	1.0264	0.959105	0.980046	1.10231	1.01581	anatomical structure formation involved in morphogenesis;biological regulation;biosynthetic process;cell proliferation;cell redox homeostasis;cellular biosynthetic process;cellular homeostasis;cellular lipid metabolic process;cellular macromolecule metabolic process;cellular metabolic process;cellular nitrogen compound metabolic process;cellular process;cellular response to stimulus;developmental…	antioxidant activity;binding;catalytic activity;coenzyme binding;cofactor binding;disulfide oxidoreductase activity;electron carrier activity;flavin adenine dinucleotide binding;oxidoreductase activity;oxidoreductase activity, acting on a sulfur group of donors;oxidoreductase activity, acting on a sulfur group of donors, NAD or NADP as acceptor;oxidoreductase activity, acting on NADH or NADPH;pro…	cell part;cytoplasmic part;cytosol;extracellular membrane-bounded organelle;extracellular organelle;extracellular region part;extracellular vesicular exosome;intracellular membrane-bounded organelle;intracellular non-membrane-bounded organelle;intracellular organelle;intracellular organelle part;intracellular part;membrane-bounded organelle;membrane-bounded vesicle;mitochondrion;non-membrane-boun…	3D-structure;Acetylation;Alternativesplicing;Completeproteome;Cytoplasm;Directproteinsequencing;Disulfidebond;Electrontransport;FAD;Flavoprotein;NADP;Nucleus;Oxidoreductase;Phosphoprotein;Polymorphism;Proteomicsidentification;Redox-activecenter;Referenceproteome;Selenocysteine;Transport;Ublconjugation	Pyrimidine metabolism;Selenocompound metabolism		22	22	21	43.1	43.1	40.3	60.078	0	100.4	8684700000	148	0.193914	0.599849	0.763665	A0A087WSW9;Q16881-4;Q16881-3;Q16881;E9PIR7;F8W809;E9PNQ6;A0A087WSY9;Q16881-5;Q16881-2;Q16881-6;E2QRB9;Q16881-7;E9PKD3;E9PIZ5;E9PLT3;E9PKI4;E9PQI3;E9PRI8;E9PJU2	A0A087WSW9;Q16881-4;Q16881-3;Q16881;E9PIR7;F8W809;E9PNQ6;A0A087WSY9;Q16881-5;Q16881-2;Q16881-6;E2QRB9;Q16881-7;E9PKD3	Thioredoxin reductase 1, cytoplasmic	TXNRD1
0.993466	1.03641	1.11085	1.05687	1.06653	1.07628	1.00655	1.01671	0.998392	0.997389	1.00869	1.13565	1.02042	1.01358	0.983748	1.00416	0.925712	0.975241	1.00684	1.0256	0.955155	0.991648	1.11393	1.03433	cellular macromolecule metabolic process;cellular metabolic process;cellular nitrogen compound metabolic process;cellular process;cellular protein metabolic process;macromolecule metabolic process;macromolecule modification;maturation of SSU-rRNA;maturation of SSU-rRNA from tricistronic rRNA transcript (SSU-rRNA, 5.8S rRNA, LSU-rRNA);metabolic process;ncRNA metabolic process;ncRNA processing;nitr…		cell part;CUL4 RING ubiquitin ligase complex;cullin-RING ubiquitin ligase complex;intracellular non-membrane-bounded organelle;intracellular organelle;intracellular organelle part;intracellular part;macromolecular complex;non-membrane-bounded organelle;nuclear part;nucleolus;organelle;organelle part;preribosome;protein complex;ribonucleoprotein complex;small-subunit processome;ubiquitin ligase co…	Acetylation;Alternativesplicing;Completeproteome;Nucleus;Polymorphism;Proteomicsidentification;Referenceproteome;Repeat;Ribonucleoprotein;Ribosomebiogenesis;rRNAprocessing;Ublconjugationpathway;WDrepeat			9	9	9	13.6	13.6	13.6	67.55	0	14.61	904570000	23	0.49928	0.542469	0.839818	A0A087WT20;Q9NV06;B3KME9;E5RHM4;Q9NV06-2;A0A087X1F8	A0A087WT20;Q9NV06;B3KME9	DDB1- and CUL4-associated factor 13	DCAF13
0.98914	1.01947	0.961663	0.972221	1.0536	1.04555	0.999129	1.01254	0.982906	0.959039	1.02254	0.919671	1.02749	1.02128	1.00107	0.998376	1.08642	1.02297	1.04336	1.02401	0.984547	1.00517	0.879207	0.950274				Completeproteome;Phosphoprotein;Polymorphism;Proteomicsidentification;Referenceproteome			8	8	8	38	38	38	20.336	0	30.937	1447300000	25	0.373337	0.898435	0.921633	A0A087WT30;Q8N5I9;J3KN91	A0A087WT30;Q8N5I9;J3KN91	Uncharacterized protein C12orf45	C12orf45
0.868936	0.874178	0.938568	0.971583	1.02629	1.05056	1.00414	0.975952	0.989374	0.938469	1.06524	0.847141	1.05059	1.03404	1.03105	1.01745	1.04563	1.02375	0.970133	0.876042	1.08352	1.08264	0.79571	0.984208				Completeproteome;Proteomicsidentification;Referenceproteome			3	3	3	19.3	19.3	19.3	18.097	0	66.93	237380000	14	0.537638	0.647001	0.949614	A0A087WT39;A0A087WZP9	A0A087WT39;A0A087WZP9		LIME1
0.970035	0.994448	0.978496	1.00261	1.06443	1.07169	1.00138	1.01872	0.993333	0.970221	0.994648	0.943659	1.02606	1.01703	1.00495	1.00413	1.02811	1.02169	1.01364	0.990858	0.995036	1.01647	0.928967	0.992672			blood microparticle;cell part;cytoplasmic part;early endosome;endosome;extracellular region part;intracellular membrane-bounded organelle;intracellular organelle;intracellular part;membrane-bounded organelle;organelle	Acetylation;Alternativesplicing;Coiledcoil;Completeproteome;Directproteinsequencing;Endosome;Phosphoprotein;Proteomicsidentification;Referenceproteome			38	38	38	53.3	53.3	53.3	90.856	0	184.29	7448400000	156	0.805036	0.756112	0.987327	A0A087WT45;Q4V328;A0A075B793;Q4V328-4;Q4V328-2;Q4V328-3;A0A087WXA6;A0A087WZF5;A0A087WW92	A0A087WT45;Q4V328;A0A075B793;Q4V328-4;Q4V328-2;Q4V328-3	GRIP1-associated protein 1	GRIPAP1
0.94924	0.975575	1.05117	0.991385	1.07433	1.09135	1.04321	1.01894	1.00458	0.992251	1.04033	1.04488	1.05368	1.01896	1.00174	1.02679	0.995085	0.993014	1.00753	0.97093	1.00377	1.02379	1.01369	1.00846	anatomical structure development;axon ensheathment;biological regulation;biosynthetic process;cell development;cellular biosynthetic process;cellular developmental process;cellular macromolecule biosynthetic process;cellular macromolecule metabolic process;cellular metabolic process;cellular process;cellular protein metabolic process;cellular response to stimulus;cellular response to stress;devel…	binding;nucleic acid binding;protein binding;RNA binding;translation factor activity, nucleic acid binding;translation initiation factor activity;translation initiation factor binding	cell part;cytoplasm;cytoplasmic part;cytosol;eukaryotic translation initiation factor 2B complex;intracellular part;macromolecular complex;protein complex	Acetylation;Alternativesplicing;Completeproteome;Diseasemutation;Initiationfactor;Leukodystrophy;Phosphoprotein;Polymorphism;Proteinbiosynthesis;Proteomicsidentification;Referenceproteome	RNA transport		14	14	1	28.5	28.5	3.8	57.495	0	128.58	1799500000	36	0.215621	0.65947	0.706513	A0A087WTA5;Q9UI10-3;Q9UI10-2;H7C2L8	A0A087WTA5;Q9UI10-3;Q9UI10-2	Translation initiation factor eIF-2B subunit delta	EIF2B4
0.967436	0.999608	1.16805	1.07384	1.12544	1.15544	1.00823	1.01993	0.998355	0.983778	1.03548	1.0084	1.02221	1.01391	0.984397	1.01572	0.875131	0.959389	1.01198	0.992834	0.952331	0.96632	1.05698	0.999631	biological regulation;catabolic process;cellular catabolic process;cellular macromolecule catabolic process;cellular macromolecule metabolic process;cellular metabolic process;cellular process;cellular protein metabolic process;cellular response to acid;cellular response to amine stimulus;cellular response to amino acid stimulus;cellular response to chemical stimulus;cellular response to endogeno…	amine binding;amino acid binding;binding;carboxylic acid binding;catalytic activity;cation binding;ion binding;leucine binding;ligase activity;metal ion binding;transition metal ion binding;zinc ion binding	cell part;cytoplasm;cytoplasmic part;cytosol;intracellular part;macromolecular complex;proteasome complex;protein complex;ubiquitin ligase complex	3D-structure;Acetylation;Alternativesplicing;Completeproteome;Cytoplasm;Diseasemutation;Ligase;Metal-binding;Phosphoprotein;Polymorphism;Proteomicsidentification;Referenceproteome;Ublconjugationpathway;Zinc;Zinc-finger			5	5	5	5.9	5.9	5.9	124.07	0	13.863	423630000	13	0.787868	0.99926	0.904956	A0A087WTJ9;Q8IWV7;Q8IWV7-2;H3BUC4	A0A087WTJ9;Q8IWV7	E3 ubiquitin-protein ligase UBR1	UBR1
0.989018	1.04434	1.04296	1.01038	1.1334	1.15888	1.00472	1.02407	0.976127	0.995348	0.940349	1.13853	1.0186	1.01573	0.981435	1.01715	0.94079	0.964328	1.02554	1.00982	0.954949	1.00585	1.13609	1.06296			cell part;integral to membrane;intrinsic to membrane;membrane part	Alternativesplicing;Completeproteome;Membrane;Phosphoprotein;Proteomicsidentification;Referenceproteome;Transmembrane;Transmembranehelix			3	3	3	35.1	35.1	35.1	7.9924	0	15.77	332400000	10	0.190227	0.391936	0.834567	Q5JWB9;A0A087WTT2;Q96A57;Q96A57-2	Q5JWB9;A0A087WTT2;Q96A57;Q96A57-2	Transmembrane protein 230	TMEM230
0.958952	1.00466	0.934597	1.00218	1.06868	1.04208	0.990921	1.01117	0.972451	0.956004	1.04352	0.9234	1.06304	1.04476	1.04919	1.04459	1.24174	1.02057	1.00156	0.979909	1.00162	1.02176	0.937976	0.968937	biological regulation;cell cycle;cell cycle process;cellular component organization;cellular component organization at cellular level;cellular component organization or biogenesis;cellular component organization or biogenesis at cellular level;cellular process;endosome transport;establishment of localization;establishment of localization in cell;G2/M transition of mitotic cell cycle;intracellular…		cell part;cell projection;centrosome;cilium;cytoplasm;cytoplasmic part;cytoskeletal part;cytosol;intracellular membrane-bounded organelle;intracellular non-membrane-bounded organelle;intracellular organelle;intracellular organelle part;intracellular part;membrane-bounded organelle;microtubule organizing center;non-membrane-bounded organelle;nuclear part;nucleoplasm;nucleus;organelle;organelle par…	Alternativesplicing;Cellprojection;Ciliopathy;Cilium;Completeproteome;Cone-roddystrophy;Cytoplasm;Cytoskeleton;Deafness;Diabetesmellitus;Obesity;Phosphoprotein;Polymorphism;Proteomicsidentification;Referenceproteome;Repeat			9	9	9	2.4	2.4	2.4	456.41	0	15.12	609430000	15	0.460651	0.538338	0.354539	A0A087WTU9;A0A087WZY3;Q8TCU4-2;Q8TCU4;A0A087WV20;Q8TCU4-3;H7C1D9	A0A087WTU9;A0A087WZY3;Q8TCU4-2;Q8TCU4;A0A087WV20;Q8TCU4-3	Alstrom syndrome protein 1	ALMS1
0.97191	1.00415	0.950549	0.979733	1.14734	1.13312	1.00262	0.997647	0.994145	0.968155	0.955519	0.937367	1.02073	1.00957	0.988236	0.999079	1.05338	1.01658	1.1232	1.18208	0.993341	1.06414	0.829371	0.960637	biological regulation;biosynthetic process;cell proliferation;cellular biosynthetic process;cellular macromolecule biosynthetic process;cellular macromolecule metabolic process;cellular metabolic process;cellular nitrogen compound metabolic process;cellular process;defense response;defense response to virus;gene expression;immune effector process;immune response;immune system process;innate immun…	catalytic activity;DNA-directed RNA polymerase activity;nucleotidyltransferase activity;RNA polymerase activity;transferase activity;transferase activity, transferring phosphorus-containing groups	cell part;chromatin;chromosomal part;cytoplasmic part;cytosol;DNA-directed RNA polymerase complex;DNA-directed RNA polymerase III complex;intracellular organelle part;intracellular part;macromolecular complex;nuclear chromatin;nuclear chromosome part;nuclear DNA-directed RNA polymerase complex;nuclear part;nucleoplasm;nucleoplasm part;organelle part;protein complex;RNA polymerase complex	Antiviraldefense;Completeproteome;DNA-directedRNApolymerase;Immunity;Innateimmunity;Nucleus;Phosphoprotein;Proteomicsidentification;Referenceproteome;Transcription	Cytosolic DNA-sensing pathway;Purine metabolism;Pyrimidine metabolism;RNA polymerase		3	3	3	12.3	12.3	12.3	25.579	0	9.7087	221820000	10	0.540691	0.500847	0.984912	D6R9U7;A0A087WTV7;O15318;D6R921	D6R9U7;A0A087WTV7;O15318	DNA-directed RNA polymerase III subunit RPC7	POLR3G
0.982753	1.00288	1.06788	1.01727	1.05032	1.0421	1.01938	1.01909	1.00576	0.998612	1.02528	1.06309	1.0295	1.02015	0.989609	1.0103	0.99671	0.984284	1.01713	0.995855	0.997331	1.0125	1.0182	0.986514	biological regulation;biosynthetic process;cell cycle;cell proliferation;cellular biosynthetic process;cellular component organization;cellular component organization at cellular level;cellular component organization or biogenesis;cellular component organization or biogenesis at cellular level;cellular macromolecule biosynthetic process;cellular macromolecule metabolic process;cellular metabolic …	acid-amino acid ligase activity;binding;catalytic activity;cation binding;chromatin binding;core promoter proximal region DNA binding;core promoter proximal region sequence-specific DNA binding;DNA binding;histone binding;identical protein binding;ion binding;ligase activity;ligase activity, forming carbon-nitrogen bonds;metal ion binding;methylated histone residue binding;methyl-CpG binding;nucl…	cell part;chromatin;chromosomal part;euchromatin;heterochromatin;intracellular membrane-bounded organelle;intracellular organelle;intracellular organelle part;intracellular part;membrane-bounded organelle;nuclear chromatin;nuclear chromosome part;nuclear heterochromatin;nuclear matrix;nuclear part;nucleus;organelle;organelle part;replication fork	3D-structure;Acetylation;Alternativesplicing;Cellcycle;Chromatinregulator;Completeproteome;DNA-binding;DNAdamage;DNArepair;Isopeptidebond;Ligase;Metal-binding;Nucleus;Phosphoprotein;Polymorphism;Proteomicsidentification;Referenceproteome;Repeat;Repressor;Transcription;Transcriptionregulation;Ublconjugation;Ublconjugationpathway;Zinc;Zinc-finger			26	26	25	32.8	32.8	31.5	91.099	0	258.8	6355900000	101	0.469807	0.882821	0.876157	A0A087WVR3;A0A087WTW0;Q96T88;Q96T88-2;A0A087WWG9	A0A087WVR3;A0A087WTW0;Q96T88;Q96T88-2;A0A087WWG9	E3 ubiquitin-protein ligase UHRF1	UHRF1
1.00412	1.0296	1.08312	1.04152	1.09481	1.1132	1.01696	1.0229	1.0086	1.00232	1.047	1.18345	1.0311	1.01939	0.996379	1.01663	0.930627	0.982573	1.02445	0.983713	1.01942	1.03301	0.950855	0.955696	cation transport;cellular process;divalent inorganic cation transport;divalent metal ion transport;establishment of localization;ion transport;metal ion transport;transition metal ion transport;transmembrane transport;transport;zinc ion transport	cation transmembrane transporter activity;ion transmembrane transporter activity;metal ion transmembrane transporter activity;substrate-specific transmembrane transporter activity;substrate-specific transporter activity;transmembrane transporter activity;transporter activity	cell part;cytoplasmic part;endoplasmic reticulum;endoplasmic reticulum membrane;endoplasmic reticulum part;Golgi apparatus;integral to membrane;intracellular membrane-bounded organelle;intracellular organelle;intracellular organelle part;intracellular part;intrinsic to membrane;membrane;membrane part;membrane-bounded organelle;nuclear part;nucleoplasm;organelle;organelle membrane;organelle part	Completeproteome;Endoplasmicreticulum;Golgiapparatus;Iontransport;Isopeptidebond;Membrane;Phosphoprotein;Polymorphism;Proteomicsidentification;Referenceproteome;Transmembrane;Transmembranehelix;Transport;Ublconjugation;Zinc;Zinctransport			5	5	5	8.2	8.2	8.2	46.393	0	13.336	4343600000	30	0.612812	0.333421	0.185782	A0A087WTX2;Q92504;A2AAT0	A0A087WTX2;Q92504;A2AAT0	Zinc transporter SLC39A7	SLC39A7
1.00687	1.05752	1.29822	1.18798	1.17819	1.12817	1.0158	1.0437	1.00811	0.999039	0.86032	1.4609	1.01449	1.01011	0.972483	1.00897	0.938359	0.977311	1.01903	1.09338	0.938289	0.957058	1.28162	1.07983	cellular process;establishment of localization;transport;vesicle-mediated transport		cell part;cytoplasm;cytoplasmic part;endoplasmic reticulum membrane;endoplasmic reticulum part;endoplasmic reticulum-Golgi intermediate compartment membrane;Golgi apparatus;integral to membrane;intracellular membrane-bounded organelle;intracellular non-membrane-bounded organelle;intracellular organelle;intracellular organelle part;intracellular part;intrinsic to membrane;membrane;membrane part;me…	Completeproteome;Cytoplasm;Endoplasmicreticulum;ER-Golgitransport;Golgiapparatus;Membrane;Nucleus;Proteomicsidentification;Referenceproteome;Transmembrane;Transmembranehelix;Transport			2	2	2	11.6	11.6	11.6	19.509	0	7.0281	373590000	8	0.49618	0.520404	0.650929	F8W0R1;F8VR88;F8VUZ2;F8VPA6;A0A087WU02;Q96RQ1;F8VRW9	F8W0R1;F8VR88;F8VUZ2;F8VPA6;A0A087WU02;Q96RQ1;F8VRW9	Endoplasmic reticulum-Golgi intermediate compartment protein 2	ERGIC2
1.00233	1.03816	1.10031	1.05305	1.07686	1.06389	1.00683	1.02263	1.00838	1.00833	1.0281	1.14221	1.02662	1.01344	0.998297	1.01893	0.968698	1.0039	1.00517	1.00867	0.972268	1.00141	1.08175	1.03008	carbohydrate metabolic process;cation transport;cellular carbohydrate metabolic process;cellular macromolecule metabolic process;cellular metabolic process;cellular process;cellular protein metabolic process;cognition;divalent inorganic cation transport;divalent metal ion transport;establishment of localization;glycosylation;ion transport;macromolecule glycosylation;macromolecule metabolic proces…	cation transmembrane transporter activity;divalent inorganic cation transmembrane transporter activity;inorganic cation transmembrane transporter activity;ion transmembrane transporter activity;magnesium ion transmembrane transporter activity;metal ion transmembrane transporter activity;substrate-specific transmembrane transporter activity;substrate-specific transporter activity;transmembrane tra…	cell part;cytoplasmic part;endoplasmic reticulum part;integral to membrane;integral to plasma membrane;intracellular organelle part;intracellular part;intrinsic to membrane;intrinsic to plasma membrane;macromolecular complex;membrane;membrane part;oligosaccharyltransferase complex;organelle part;plasma membrane;plasma membrane part;protein complex	Alternativesplicing;Cellmembrane;Completeproteome;Disulfidebond;Endoplasmicreticulum;Glycoprotein;Magnesium;Membrane;Polymorphism;Proteomicsidentification;Referenceproteome;Signal;Transmembrane;Transmembranehelix;Transport			5	5	5	13.6	13.6	13.6	41.531	0	9.9274	2064800000	26	0.217269	0.533692	0.77328	A0A087WU53;Q9H0U3;Q9H0U3-2	A0A087WU53;Q9H0U3;Q9H0U3-2	Magnesium transporter protein 1	MAGT1
0.962621	0.991436	1.05494	1.0285	0.989392	0.962971	1.00271	1.01295	0.994351	0.994306	1.03113	1.04714	1.03343	1.02335	0.995153	1.01041	0.980858	0.999341	0.999537	0.994586	0.995604	1.00836	1.00772	0.995247	biosynthetic process;cellular biosynthetic process;cellular component disassembly;cellular component disassembly at cellular level;cellular component organization;cellular component organization at cellular level;cellular component organization or biogenesis;cellular component organization or biogenesis at cellular level;cellular macromolecular complex disassembly;cellular macromolecular complex …		cell part;cytoplasmic part;intracellular membrane-bounded organelle;intracellular non-membrane-bounded organelle;intracellular organelle;intracellular organelle part;intracellular part;macromolecular complex;membrane;membrane-bounded organelle;mitochondrial inner membrane;mitochondrial membrane;mitochondrial part;mitochondrion;non-membrane-bounded organelle;organelle;organelle inner membrane;orga…	3D-structure;Completeproteome;Mitochondrion;Polymorphism;Proteomicsidentification;Referenceproteome;Ribonucleoprotein;Ribosomalprotein;Transitpeptide			10	10	10	38.7	38.7	38.7	29.348	0	20.988	2252100000	55	0.803625	0.805924	0.97207	A0A087WU62;A0A087X2D5;Q9BRJ2	A0A087WU62;A0A087X2D5;Q9BRJ2	39S ribosomal protein L45, mitochondrial	MRPL45
0.978976	1.01502	1.05465	1.02299	1.02213	1.01347	1.01408	1.02867	0.996	0.994039	1.02439	1.09394	1.01689	1.00866	0.982885	1.00633	0.944926	0.980851	1.00459	1.00276	0.970306	0.993811	1.01511	1.00591	anatomical structure homeostasis;biological regulation;biosynthetic process;cell cycle;cell cycle process;cell proliferation;cellular biosynthetic process;cellular component organization;cellular component organization at cellular level;cellular component organization or biogenesis;cellular component organization or biogenesis at cellular level;cellular macromolecule biosynthetic process;cellular…	3'-5' exonuclease activity;4 iron, 4 sulfur cluster binding;binding;catalytic activity;cation binding;chromatin binding;DNA binding;DNA polymerase activity;DNA-directed DNA polymerase activity;enzyme binding;exonuclease activity;hydrolase activity;hydrolase activity, acting on ester bonds;ion binding;iron-sulfur cluster binding;kinase binding;metal cluster binding;metal ion binding;nuclease activ…	alpha DNA polymerase:primase complex;cell part;chromosomal part;cytoplasm;envelope;intracellular membrane-bounded organelle;intracellular non-membrane-bounded organelle;intracellular organelle;intracellular organelle part;intracellular part;macromolecular complex;membrane-bounded organelle;non-membrane-bounded organelle;nuclear chromosome part;nuclear envelope;nuclear matrix;nuclear part;nucleolu…	3D-structure;4Fe-4S;Acetylation;Completeproteome;Directproteinsequencing;DNA-binding;DNA-directedDNApolymerase;DNAreplication;Host-virusinteraction;Iron;Iron-sulfur;Metal-binding;Nucleotidyltransferase;Nucleus;Phosphoprotein;Polymorphism;Proteomicsidentification;Referenceproteome;Transferase;Zinc;Zinc-finger	DNA replication;Purine metabolism;Pyrimidine metabolism		9	9	9	6.7	6.7	6.7	165.77	0	28.128	410830000	19	0.801963	0.357897	0.75219	A0A087WU64;A6NMQ1;P09884	A0A087WU64;A6NMQ1;P09884	DNA polymerase;DNA polymerase alpha catalytic subunit	POLA1
1.00595	1.03682	1.07581	1.02222	1.06517	1.0613	1.00597	1.00815	0.998732	0.998917	0.990391	1.17466	1.02628	1.01731	0.990113	1.02085	1.01047	0.976193	1.00058	1.03486	0.961677	1.00837	1.10925	1.0307	biological regulation;blood coagulation;cellular process;coagulation;establishment of localization;establishment of localization in cell;establishment of protein localization;hemostasis;intracellular protein transport;intracellular transport;membrane docking;multicellular organismal process;protein transport;regulation of biological quality;regulation of body fluid levels;transport;vesicle dockin…		cell part;cytoplasmic part;endosomal part;endosome membrane;Golgi apparatus;Golgi apparatus part;Golgi membrane;integral to membrane;intracellular membrane-bounded organelle;intracellular organelle;intracellular organelle part;intracellular part;intrinsic to membrane;membrane;membrane part;membrane-bounded organelle;organelle;organelle membrane;organelle part	Alternativesplicing;Completeproteome;Diseasemutation;Endosome;Golgiapparatus;Membrane;Phosphoprotein;Proteintransport;Proteomicsidentification;Referenceproteome;Transport	Endocytosis		7	7	6	14.8	14.8	13	50.736	0	6.065	286100000	9	0.162065	0.524248	0.90291	A0A087WU65;Q9NRW7;Q9NRW7-2;A0A0A6YYS6;B7Z7G7	A0A087WU65;Q9NRW7	Vacuolar protein sorting-associated protein 45	VPS45
0.958329	0.968625	0.958703	0.979498	1.03048	1.05013	1.00874	1.01552	0.983312	0.959799	1.04102	0.868313	1.02904	1.01555	1.00322	1.00501	1.02723	1.02895	1.02333	0.983692	1.01976	1.03133	0.879569	1.00419	anatomical structure development;cell differentiation;cellular developmental process;cellular process;developmental process;lens development in camera-type eye		adherens junction;anchoring junction;apical plasma membrane;cell junction;cell part;cell projection;cell-cell junction;cell-substrate adherens junction;cell-substrate junction;cytoplasm;focal adhesion;intracellular part;lamellipodium;membrane part;occluding junction;plasma membrane part;tight junction	Alternativesplicing;Cataract;Celljunction;Cellmembrane;Cellprojection;Completeproteome;Cytoplasm;Membrane;Phosphoprotein;Polymorphism;Proteomicsidentification;Referenceproteome;Tightjunction			12	12	12	9.4	9.4	9.4	157.77	0	158.15	750470000	32	0.916713	0.809053	0.958881	A0A087WU78;A0A087WWC4;Q6T4R5-4;Q6T4R5-3;Q6T4R5-2;Q6T4R5	A0A087WU78;A0A087WWC4;Q6T4R5-4;Q6T4R5-3;Q6T4R5-2;Q6T4R5	Nance-Horan syndrome protein	NHS
0.98236	1.02371	1.02477	0.98432	1.09329	1.10679	1.01173	1.01877	0.995308	0.996402	1.00397	1.10556	1.02591	1.01841	0.991078	1.01821	0.922855	0.978707	1.0157	1.01535	0.97651	0.997959	1.07762	1.06094	apoptosis;biological regulation;cell death;cellular macromolecule metabolic process;cellular metabolic process;cellular nitrogen compound metabolic process;cellular process;death;gene expression;immune system process;macromolecule metabolic process;metabolic process;mRNA metabolic process;mRNA processing;nitrogen compound metabolic process;nuclear mRNA splicing, via spliceosome;nucleic acid metab…	binding;enzyme binding;protein binding	cell part;cytoplasm;intracellular membrane-bounded organelle;intracellular organelle;intracellular organelle part;intracellular part;macromolecular complex;membrane;membrane-bounded organelle;nuclear part;nucleoplasm;nucleus;organelle;organelle part;protein complex;Prp19 complex;ribonucleoprotein complex;spliceosomal complex	3D-structure;Acetylation;Alternativesplicing;Apoptosis;Coiledcoil;Completeproteome;Cytoplasm;mRNAprocessing;mRNAsplicing;Nucleus;Phosphoprotein;Polymorphism;Proteomicsidentification;Referenceproteome;Repeat;Spliceosome	Spliceosome		15	15	14	30.3	30.3	30.3	65.702	0	75.52	2622200000	62	0.184227	0.452793	0.694713	A0A087WUB9;Q8WYA6;Q8WYA6-4;Q8WYA6-3;Q8WYA6-2;A2A2P1	A0A087WUB9;Q8WYA6;Q8WYA6-4;Q8WYA6-3;Q8WYA6-2	Beta-catenin-like protein 1	CTNNBL1
0.964531	0.990028	1.07372	1.02454	1.05142	1.03816	1.01236	1.01569	1.00694	0.99631	1.04337	1.10372	1.02691	1.02222	1.00061	1.01374	0.966173	0.99289	1.01033	1.01726	1.00646	1.02444	1.03475	1.01319	biological regulation;biosynthetic process;cellular biosynthetic process;cellular macromolecule biosynthetic process;cellular macromolecule metabolic process;cellular metabolic process;cellular process;cellular protein metabolic process;cotranslational protein targeting to membrane;establishment of localization;establishment of localization in cell;establishment of protein localization;establishm…	catalytic activity;hydrolase activity;peptidase activity	cell part;cytoplasmic part;endoplasmic reticulum membrane;endoplasmic reticulum part;integral to membrane;intracellular organelle part;intracellular part;intrinsic to membrane;macromolecular complex;membrane;membrane part;organelle membrane;organelle part;protein complex;signal peptidase complex	Acetylation;Completeproteome;Directproteinsequencing;Endoplasmicreticulum;Hydrolase;Membrane;Microsome;Protease;Proteomicsidentification;Referenceproteome;Transmembrane;Transmembranehelix	Protein export		12	12	12	72.6	72.6	72.6	17.027	0	323.31	9360900000	54	0.335297	0.701204	0.704367	E9PL01;A0A087WUC6;E9PI68;Q15005;E9PRB9;H0YE04	E9PL01;A0A087WUC6;E9PI68;Q15005;E9PRB9	Signal peptidase complex subunit 2	SPCS2
0.947365	0.986329	1.01625	1.02932	1.0291	1.06566	0.994493	1.00213	0.982248	0.958154	1.05185	1.12081	1.03801	1.0143	1.02897	1.02125	0.833879	1.02089	1.00929	0.981726	1.01983	1.02218	1.03059	1.1118	biological regulation;biosynthetic process;cellular biosynthetic process;cellular macromolecule biosynthetic process;cellular macromolecule metabolic process;cellular metabolic process;cellular nitrogen compound metabolic process;cellular process;macromolecule biosynthetic process;macromolecule metabolic process;metabolic process;nitrogen compound metabolic process;nucleic acid metabolic process;…	binding;cation binding;DNA binding;ion binding;metal ion binding;nucleic acid binding	cell part;intracellular membrane-bounded organelle;intracellular organelle;intracellular part;membrane-bounded organelle;nucleus;organelle	Completeproteome;DNA-binding;Metal-binding;Nucleus;Phosphoprotein;Polymorphism;Proteomicsidentification;Referenceproteome;Repeat;Transcription;Transcriptionregulation;Zinc;Zinc-finger			7	7	7	27	27	27	40.428	0	49.898	1564900000	20	0.652219	0.329665	0.225685	A0A087WUD1;Q6DD87	A0A087WUD1;Q6DD87	Zinc finger protein 787	ZNF787
1.01572	1.09449	1.11258	1.03799	1.26792	1.21361	0.993261	0.999588	0.985596	0.996104	0.993055	1.15958	1.00903	1.00888	0.979229	1.02374	0.930358	0.985897	1.02173	1.08415	0.955777	0.987075	1.11212	1.02657	carbohydrate metabolic process;cellular carbohydrate metabolic process;cellular macromolecule metabolic process;cellular metabolic process;cellular process;cellular protein metabolic process;glycosylation;macromolecule glycosylation;macromolecule metabolic process;macromolecule modification;metabolic process;peptidyl-amino acid modification;peptidyl-asparagine modification;primary metabolic proce…		cell part;cytoplasmic part;endoplasmic reticulum part;integral to membrane;intracellular organelle part;intracellular part;intrinsic to membrane;macromolecular complex;membrane part;oligosaccharyltransferase complex;organelle part;protein complex	Alternativesplicing;Completeproteome;Membrane;Polymorphism;Proteomicsidentification;Referenceproteome;Transmembrane;Transmembranehelix			1	1	1	14.5	14.5	14.5	9.369	0	6.9965	322780000	21	0.154813	0.530326	0.869349	A0A087WUD3;Q9NRP0;Q9NRP0-2	A0A087WUD3;Q9NRP0;Q9NRP0-2	Oligosaccharyltransferase complex subunit OSTC	OSTC
0.95786	1.00306	1.02641	1.00663	1.13634	1.17058	1.0198	1.02244	0.989827	0.964051	0.976774	0.927033	1.02142	1.00425	0.986692	1.00033	0.992585	1.01322	1.02278	1.00708	0.987299	1.00587	0.93532	0.990995	amine catabolic process;amine metabolic process;asparagine catabolic process;asparagine catabolic process via L-aspartate;asparagine metabolic process;aspartate family amino acid catabolic process;aspartate family amino acid metabolic process;carboxylic acid catabolic process;carboxylic acid metabolic process;catabolic process;cellular amine metabolic process;cellular amino acid catabolic process…	asparaginase activity;beta-aspartyl-peptidase activity;catalytic activity;exopeptidase activity;hydrolase activity;hydrolase activity, acting on carbon-nitrogen (but not peptide) bonds;hydrolase activity, acting on carbon-nitrogen (but not peptide) bonds, in linear amides;omega peptidase activity;peptidase activity;peptidase activity, acting on L-amino acid peptides	cell part;cytoplasm;intracellular membrane-bounded organelle;intracellular organelle;intracellular part;membrane-bounded organelle;nucleus;organelle	3D-structure;Acetylation;Alternativesplicing;Autocatalyticcleavage;Completeproteome;Cytoplasm;Hydrolase;Protease;Proteomicsidentification;Referenceproteome			3	3	3	27.4	27.4	27.4	17.238	0	12.693	204530000	9	0.704203	0.782624	0.879099	A0A087WUG3;Q7L266;E9PJK6;A0A087WZI5	A0A087WUG3;Q7L266;E9PJK6;A0A087WZI5	Isoaspartyl peptidase/L-asparaginase;Isoaspartyl peptidase/L-asparaginase alpha chain;Isoaspartyl peptidase/L-asparaginase beta chain	ASRGL1
0.909488	0.944151	0.928128	0.944952	1.02109	1.04039	0.987934	0.99683	1.00852	0.989863	1.04918	1.00598	1.0843	1.05153	0.981036	1.02115	0.937926	0.989937	1.0047	1.0044	1.00152	0.989416	1.15236	1.19189	biological regulation;catabolic process;cellular catabolic process;cellular macromolecule catabolic process;cellular macromolecule metabolic process;cellular metabolic process;cellular nitrogen compound metabolic process;cellular process;cellular response to stimulus;cellular response to stress;DNA catabolic process;DNA excision;DNA metabolic process;DNA repair;macromolecule catabolic process;mac…	binding;bubble DNA binding;catalytic activity;cation binding;deoxyribonuclease activity;DNA binding;DNA secondary structure binding;double-stranded DNA binding;endodeoxyribonuclease activity;endonuclease activity;hydrolase activity;hydrolase activity, acting on ester bonds;identical protein binding;ion binding;metal ion binding;nuclease activity;nucleic acid binding;protein binding;protein dimeri…	cell part;cytoskeleton;intermediate filament cytoskeleton;intracellular membrane-bounded organelle;intracellular non-membrane-bounded organelle;intracellular organelle;intracellular organelle part;intracellular part;membrane-bounded organelle;non-membrane-bounded organelle;nuclear part;nucleoplasm;nucleus;organelle;organelle part	Acetylation;Alternativesplicing;Cockaynesyndrome;Completeproteome;Deafness;Diseasemutation;DNA-binding;DNAdamage;DNArepair;Dwarfism;Endonuclease;Hydrolase;Magnesium;Metal-binding;Nuclease;Nucleus;Phosphoprotein;Polymorphism;Proteomicsidentification;Referenceproteome;Xerodermapigmentosum	Nucleotide excision repair		5	5	5	4.7	4.7	4.7	133.11	0	5.1399	232430000	6	0.312022	0.752708	0.810833	A0A087WUH0;P28715;R4GMW8;P28715-2	A0A087WUH0;P28715;R4GMW8	DNA repair protein complementing XP-G cells	ERCC5;BIVM-ERCC5
0.969983	0.996523	0.978458	0.980153	1.07094	1.06864	1.00597	1.01203	0.992143	0.971003	0.997901	0.958507	1.01462	1.00394	1.00446	1.01139	1.01245	1.01385	1.01269	1.01645	0.989802	1.00947	0.925721	0.970553	actin cytoskeleton organization;actin filament organization;actin filament-based process;anatomical structure development;biological regulation;biosynthetic process;brain development;cellular biosynthetic process;cellular component organization;cellular component organization at cellular level;cellular component organization or biogenesis;cellular component organization or biogenesis at cellular …	actin binding;actin filament binding;binding;cytoskeletal protein binding;DNA binding;double-stranded DNA binding;mRNA binding;nucleic acid binding;nucleotide binding;poly(A) RNA binding;poly(G) RNA binding;poly-purine tract binding;protein binding;RNA binding;single-stranded DNA binding;single-stranded RNA binding;structure-specific DNA binding	actin filament bundle;actomyosin;apical plasma membrane;basal plasma membrane;cell cortex part;cell part;cortical actin cytoskeleton;cortical cytoskeleton;cytoplasm;cytoplasmic part;cytoskeletal part;cytoskeleton;extracellular membrane-bounded organelle;extracellular organelle;extracellular region part;extracellular vesicular exosome;internal side of plasma membrane;intracellular membrane-bounded…	3D-structure;Acetylation;Actin-binding;Activator;Alternativesplicing;Chromosomalrearrangement;Coiledcoil;Completeproteome;Cytoplasm;Cytoskeleton;Developmentalprotein;Directproteinsequencing;Diseasemutation;DNA-binding;Limb-girdlemusculardystrophy;Mentalretardation;Methylation;Nucleus;Phosphoprotein;Polymorphism;Proteomicsidentification;Referenceproteome;Repeat;Repressor;Ribonucleoprotein;RNA-bind…			23	23	4	51	51	11.3	40.04	0	174.97	75998000000	281	0.674409	0.685364	0.959428	A0A087WUK2;O14979;REV__Q8N0S2-3;REV__Q8N0S2-2;REV__Q8N0S2;REV__Q9ULL8-2;REV__Q9ULL8;Q9ULL8-2;Q9ULL8	A0A087WUK2;O14979	Heterogeneous nuclear ribonucleoprotein D-like	HNRNPDL
0.931742	0.962469	1.06886	1.01934	1.08153	1.08062	1.01273	1.00664	1.00881	0.998612	1.01379	1.00729	1.03997	1.02109	1.00877	1.02183	1.02123	0.981747	1.00795	0.968974	1.01271	1.03163	0.996676	1.0033	alcohol metabolic process;alditol metabolic process;biological regulation;carbohydrate metabolic process;carbohydrate phosphorylation;cellular carbohydrate metabolic process;cellular metabolic process;cellular process;defense response;fructose metabolic process;glycerol metabolic process;hexose metabolic process;immune response;immune system process;innate immune response;metabolic process;monosa…	adenyl nucleotide binding;adenyl ribonucleotide binding;ATP binding;binding;catalytic activity;cation binding;cyclase activity;FAD-AMP lyase (cyclizing) activity;glycerone kinase activity;ion binding;kinase activity;lyase activity;metal ion binding;nucleotide binding;phosphorus-oxygen lyase activity;phosphotransferase activity, alcohol group as acceptor;purine nucleotide binding;purine ribonucleo…	cell part;cytoplasmic part;cytosol;extracellular membrane-bounded organelle;extracellular organelle;extracellular region part;extracellular vesicular exosome;intracellular membrane-bounded organelle;intracellular organelle;intracellular part;membrane-bounded organelle;membrane-bounded vesicle;nucleus;organelle;vesicle	Alternativesplicing;ATP-binding;Cobalt;Completeproteome;FAD;Flavoprotein;Kinase;Lyase;Magnesium;Manganese;Metal-binding;Multifunctionalenzyme;Nucleotide-binding;Phosphoprotein;Polymorphism;Proteomicsidentification;Referenceproteome;Transferase	Glycerolipid metabolism;Methane metabolism;RIG-I-like receptor signaling pathway		12	12	12	24.3	24.3	24.3	59.057	0	72.587	2057500000	85	0.18788	0.598679	0.992922	A0A087WUL0;Q3LXA3;H0YCY6;Q3LXA3-2;I3L252;E9PQR1;E9PJG8	A0A087WUL0;Q3LXA3;H0YCY6;Q3LXA3-2	Bifunctional ATP-dependent dihydroxyacetone kinase/FAD-AMP lyase (cyclizing);ATP-dependent dihydroxyacetone kinase;FAD-AMP lyase (cyclizing)	TKFC;DAK
1.08702	1.12593	1.07227	1.02844	1.11444	1.11247	1.00288	1.01614	1.01895	1.00385	0.990281	1.23259	1.02451	1.02476	0.981554	1.00698	0.94788	0.997522	1.01777	1.16806	0.845106	0.871485	1.18342	1.01492	activation of immune response;activation of innate immune response;anaphase-promoting complex-dependent proteasomal ubiquitin-dependent protein catabolic process;antigen processing and presentation;antigen processing and presentation of exogenous antigen;antigen processing and presentation of exogenous peptide antigen;antigen processing and presentation of exogenous peptide antigen via MHC class …	catalytic activity;endopeptidase activity;hydrolase activity;peptidase activity;peptidase activity, acting on L-amino acid peptides;threonine-type endopeptidase activity;threonine-type peptidase activity	actin cytoskeleton;cell part;cytoplasm;cytoplasmic part;cytoskeleton;cytosol;extracellular membrane-bounded organelle;extracellular organelle;extracellular region part;extracellular vesicular exosome;Golgi apparatus;intracellular membrane-bounded organelle;intracellular non-membrane-bounded organelle;intracellular organelle;intracellular organelle part;intracellular part;macromolecular complex;me…	3D-structure;Acetylation;Completeproteome;Cytoplasm;Directproteinsequencing;Host-virusinteraction;Hydrolase;Nucleus;Polymorphism;Protease;Proteasome;Proteomicsidentification;Referenceproteome;Threonineprotease	Proteasome		5	5	5	34.5	34.5	34.5	16.161	0	17.387	2364700000	44	0.0752043	0.424497	0.769754	A0A087WUL2;P49720;A0A087WXQ8;A0A087WY10	A0A087WUL2;P49720;A0A087WXQ8;A0A087WY10	Proteasome subunit beta type-3	PSMB3
0.941571	0.993059	1.02861	1.01561	1.04102	1.07965	1.06845	1.07255	0.987628	1.04634	0.987682	1.12008	1.03166	1.02498	0.967196	0.991428	1.02674	1.00037	1.01662	1.06018	0.909835	0.945234	1.09268	1.00878	anatomical structure development;apoptosis;biological regulation;cell death;cell differentiation;cellular developmental process;cellular process;death;developmental process;negative regulation of biological process;negative regulation of cell communication;negative regulation of cellular process;negative regulation of response to stimulus;negative regulation of signal transduction;negative regula…	binding;cation binding;DNA binding;ion binding;metal ion binding;nucleic acid binding;transition metal ion binding;zinc ion binding	cell part;cytoplasm;intracellular membrane-bounded organelle;intracellular organelle;intracellular part;membrane-bounded organelle;nucleus;organelle	Apoptosis;Coiledcoil;Completeproteome;Cytoplasm;Differentiation;DNA-binding;Metal-binding;Nucleus;Phosphoprotein;Proteomicsidentification;Referenceproteome;Ribosomalframeshifting;Transposableelement;Zinc;Zinc-finger			3	3	3	9.2	9.2	9.2	40.471	0	23.235	144270000	4	0.055747	0.252432	0.978818	A0A087WZG9;B4DSP0;A0A087WUL4;A0A087WX23;A0A087WXK2;Q86TG7-2;Q86TG7	A0A087WZG9;B4DSP0;A0A087WUL4;A0A087WX23;A0A087WXK2;Q86TG7-2;Q86TG7	Retrotransposon-derived protein PEG10	PEG10
0.954491	0.997278	1.00615	1.01249	1.16749	1.19492	0.994705	1.01156	0.980145	0.976292	0.986649	0.970414	1.02599	1.00842	0.99335	1.00933	1.02284	1.02633	1.00024	1.00126	0.988716	1.01484	0.958388	1.00786	cellular component organization;cellular component organization at cellular level;cellular component organization or biogenesis;cellular component organization or biogenesis at cellular level;cellular localization;cellular process;intracellular distribution of mitochondria;localization;mitochondrion distribution;mitochondrion localization;mitochondrion organization;organelle localization;organell…		cell part;cytoplasmic part;integral to membrane;integral to mitochondrial membrane;integral to mitochondrial outer membrane;integral to organelle membrane;intracellular membrane-bounded organelle;intracellular organelle;intracellular organelle part;intracellular part;intrinsic to membrane;intrinsic to mitochondrial outer membrane;intrinsic to organelle membrane;membrane;membrane part;membrane-bou…	3D-structure;Completeproteome;Membrane;Mitochondrion;Mitochondrionoutermembrane;Polymorphism;Referenceproteome;Transmembrane;Transmembranehelix			4	4	3	26.3	26.3	20.4	17.188	0	7.6379	980340000	16	0.215148	0.579559	0.929731	A0A087X1F5;A0A087WYV9;A0A087WUM0;P57105;A0A087WX56	A0A087X1F5;A0A087WYV9;A0A087WUM0;P57105	Synaptojanin-2-binding protein	SYNJ2BP-COX16;SYNJ2BP
1.01973	1.06389	1.10632	1.05389	1.11513	1.09843	0.999164	1.00934	1.01222	1.00583	0.992812	1.18178	1.01649	1.00762	0.992648	1.01141	0.943253	0.991788	1.03345	1.07774	0.939184	0.961633	1.12867	1.09844	biological regulation;biosynthetic process;catabolic process;cellular biosynthetic process;cellular catabolic process;cellular component biogenesis;cellular component biogenesis at cellular level;cellular component disassembly;cellular component disassembly at cellular level;cellular component organization;cellular component organization at cellular level;cellular component organization or biogen…	binding;nucleotide binding;protein binding;structural constituent of ribosome;structural molecule activity;translation initiation factor binding	cell part;cytoplasm;cytoplasmic part;cytosol;cytosolic small ribosomal subunit;intracellular membrane-bounded organelle;intracellular non-membrane-bounded organelle;intracellular organelle;intracellular organelle part;intracellular part;macromolecular complex;membrane;membrane-bounded organelle;non-membrane-bounded organelle;nuclear part;nucleolus;nucleus;organelle;organelle part;ribonucleoprotei…	3D-structure;Acetylation;Alternativesplicing;Completeproteome;Diamond-Blackfananemia;Directproteinsequencing;Phosphoprotein;Proteomicsidentification;Referenceproteome;Ribonucleoprotein;Ribosomalprotein	Ribosome		6	6	6	37.4	37.4	37.4	15.197	0	14.145	3611800000	63	0.265915	0.519003	0.741099	E7ETK0;A0A087WUS0;P62847-2;P62847-3;P62847;P62847-4	E7ETK0;A0A087WUS0;P62847-2;P62847-3;P62847;P62847-4	40S ribosomal protein S24	RPS24
0.973947	0.998583	1.02988	1.02316	1.05363	1.05382	1.00807	1.01191	0.991094	0.983505	1.00757	1.0325	1.02438	1.01628	1.00583	1.0122	0.98522	1.00852	1.00913	0.992844	1.00437	1.02016	0.962394	1.01021	biological regulation;biosynthetic process;cellular biosynthetic process;cellular macromolecule biosynthetic process;cellular macromolecule metabolic process;cellular metabolic process;cellular process;cellular protein metabolic process;gene expression;macromolecule biosynthetic process;macromolecule metabolic process;metabolic process;posttranscriptional regulation of gene expression;primary met…	binding;catalytic activity;GTP binding;GTPase activity;guanyl nucleotide binding;guanyl ribonucleotide binding;hydrolase activity;hydrolase activity, acting on acid anhydrides;hydrolase activity, acting on acid anhydrides, in phosphorus-containing anhydrides;nucleic acid binding;nucleoside-triphosphatase activity;nucleotide binding;purine nucleotide binding;purine ribonucleoside triphosphate bind…	cell part;cytoplasm;cytoplasmic part;cytosol;intracellular part	Completeproteome;Cytoplasm;Directproteinsequencing;GTP-binding;Initiationfactor;Nucleotide-binding;Phosphoprotein;Polymorphism;Proteinbiosynthesis;Proteomicsidentification;Referenceproteome	RNA transport		55	55	55	39.4	39.4	39.4	138.68	0	323.31	39789000000	336	0.689001	0.346813	0.432283	A0A087WUT6;O60841	A0A087WUT6;O60841	Eukaryotic translation initiation factor 5B	EIF5B
0.949453	0.983134	0.930577	0.959024	1.07156	1.07644	1.02313	0.998389	1.00868	0.985115	1.04918	0.857304	1.06253	1.03416	1.02704	1.02165	1.10867	1.01308	1.03739	0.955416	1.02985	1.02801	0.775368	0.96492	anatomical structure development;biological regulation;catabolic process;cell activation;cell differentiation;cell division;cell proliferation;cellular catabolic process;cellular developmental process;cellular macromolecule catabolic process;cellular macromolecule metabolic process;cellular metabolic process;cellular nitrogen compound metabolic process;cellular process;definitive hemopoiesis;deve…	AU-rich element binding;binding;cation binding;DNA binding;ion binding;metal ion binding;mRNA 3'-UTR AU-rich region binding;mRNA 3'-UTR binding;mRNA binding;nucleic acid binding;nucleic acid binding transcription factor activity;RNA binding;sequence-specific DNA binding transcription factor activity	cell part;cytoplasm;intracellular membrane-bounded organelle;intracellular organelle;intracellular part;membrane-bounded organelle;nucleus;organelle	3D-structure;Completeproteome;Cytoplasm;DNA-binding;Metal-binding;Nucleus;Phosphoprotein;Proteomicsidentification;Referenceproteome;Repeat;RNA-binding;Zinc;Zinc-finger			3	2	2	7.5	4.9	4.9	51.047	0	12.25	306960000	9	0.95854	0.685779	0.952417	A0A087WUU9;P47974	A0A087WUU9;P47974	Zinc finger protein 36, C3H1 type-like 2	ZFP36L2
0.984971	1.02823	1.08292	1.05745	1.24429	1.25597	1.01734	1.03155	1.01181	0.997355	0.940598	1.02041	1.0051	0.992962	0.98379	1.02348	0.911349	0.99812	1.00686	1.01297	0.978178	1.01801	1.02691	1.0355	biological regulation;cellular process;cellular response to stimulus;establishment of localization;establishment of localization in cell;establishment of protein localization;intracellular protein transport;intracellular signal transduction;intracellular transport;protein transport;regulation of biological process;regulation of cellular process;response to stimulus;signal transduction;small GTPas…	binding;GTP binding;guanyl nucleotide binding;guanyl ribonucleotide binding;nucleotide binding;purine nucleotide binding;purine ribonucleoside triphosphate binding;purine ribonucleotide binding;ribonucleotide binding	cell part;extracellular membrane-bounded organelle;extracellular organelle;extracellular region part;extracellular vesicular exosome;intracellular;membrane-bounded organelle;membrane-bounded vesicle;organelle;vesicle	Completeproteome;GTP-binding;Nucleotide-binding;Proteomicsidentification;Referenceproteome			3	3	3	19.1	19.1	19.1	22.876	0	8.6724	116920000	7	0.537549	0.510173	0.810353	A0A087WUW9;Q9NXU5	A0A087WUW9;Q9NXU5	ADP-ribosylation factor-like protein 15	ARL15
0.967514	0.999508	0.98469	1.00941	1.10546	1.11553	1.00268	1.01103	0.976821	0.960801	1.00125	0.94369	1.01876	1.01239	1.00549	1.00179	1.01507	1.00613	1.01376	0.987407	1.00715	1.02781	0.942953	0.993449	biological regulation;biosynthetic process;cellular biosynthetic process;cellular macromolecule biosynthetic process;cellular macromolecule metabolic process;cellular metabolic process;cellular nitrogen compound metabolic process;cellular process;gamete generation;macromolecule biosynthetic process;macromolecule metabolic process;male gamete generation;metabolic process;multicellular organismal p…	protein binding transcription factor activity;transcription coactivator activity;transcription cofactor activity;transcription factor binding transcription factor activity	cell part;centrosome;cytoplasm;cytoplasmic part;cytoskeletal part;intracellular membrane-bounded organelle;intracellular non-membrane-bounded organelle;intracellular organelle;intracellular organelle part;intracellular part;membrane-bounded organelle;microtubule organizing center;mitochondrion;non-membrane-bounded organelle;nucleus;organelle;organelle part	3D-structure;Completeproteome;Cytoplasm;Directproteinsequencing;Mitochondrion;Nucleus;Referenceproteome;Transcription;Transcriptionregulation			6	6	6	35.5	35.5	35.5	12.755	0	18.234	9789300000	65	0.624086	0.857306	0.992162	A0A087WV05;Q99417	A0A087WV05;Q99417	C-Myc-binding protein	MYCBP
0.941781	0.973621	1.00916	1.01654	1.03255	1.04241	1.00333	0.996609	0.995606	0.972271	1.03968	1.02716	1.0398	1.04517	1.00875	1.01759	1.0229	1.01706	0.958935	0.987962	1.02432	1.02889	0.931541	1.06202	anatomical structure development;biological adhesion;biological regulation;cell adhesion;cell differentiation;cell junction assembly;cell junction organization;cell-substrate junction assembly;cellular component assembly;cellular component assembly at cellular level;cellular component disassembly;cellular component disassembly at cellular level;cellular component organization;cellular component o…	structural molecule activity	basement membrane;extracellular matrix part;extracellular membrane-bounded organelle;extracellular organelle;extracellular region;extracellular region part;extracellular vesicular exosome;laminin complex;laminin-1 complex;laminin-5 complex;macromolecular complex;membrane-bounded organelle;membrane-bounded vesicle;organelle;protein complex;vesicle	Alternativesplicing;Basementmembrane;Celladhesion;Coiledcoil;Completeproteome;Disulfidebond;Epidermolysisbullosa;Extracellularmatrix;Glycoprotein;LamininEGF-likedomain;Polymorphism;Proteomicsidentification;Referenceproteome;Repeat;Secreted;Signal	Amoebiasis;ECM-receptor interaction;Focal adhesion;Pathways in cancer;Small cell lung cancer;Toxoplasmosis		5	5	5	2.9	2.9	2.9	184.02	0	8.4448	105890000	9	0.415442	0.454574	0.79475	A0A0A0MTS5;A0A0A6YYF2;A0A0A0MSA0;A0A087WV15;Q16787-4;Q16787-1;Q16787-3;Q16787;K7EIP4	A0A0A0MTS5;A0A0A6YYF2;A0A0A0MSA0;A0A087WV15;Q16787-4;Q16787-1;Q16787-3;Q16787;K7EIP4	Laminin subunit alpha-3	LAMA3
0.975407	0.998367	0.986797	0.991355	1.03281	1.06675	1.01949	1.00954	0.991483	0.970223	1.04368	0.9492	1.06591	1.04977	1.01242	1.02744	1.01991	1.01733	1.02187	0.98651	1.01446	1.0316	0.871249	0.989223	biological regulation;cellular process;cellular response to stimulus;intracellular receptor mediated signaling pathway;positive regulation of biological process;positive regulation of biosynthetic process;positive regulation of cellular biosynthetic process;positive regulation of cellular metabolic process;positive regulation of cellular process;positive regulation of gene expression;positive reg…	binding;DNA binding;ligand-dependent nuclear receptor activity;ligand-dependent nuclear receptor transcription coactivator activity;molecular transducer activity;nucleic acid binding;nucleic acid binding transcription factor activity;protein binding transcription factor activity;receptor activity;regulatory region DNA binding;regulatory region nucleic acid binding;sequence-specific DNA binding tr…	cell part;cytoplasmic part;cytosol;integral to membrane;intracellular membrane-bounded organelle;intracellular organelle;intracellular organelle part;intracellular part;intrinsic to membrane;lysosomal membrane;lysosome;lytic vacuole;membrane;membrane part;membrane-bounded organelle;nucleus;organelle;organelle membrane;organelle part;vacuolar membrane;vacuolar part;vacuole	Alternativesplicing;Completeproteome;Glycoprotein;Lysosome;Membrane;Polymorphism;Proteomicsidentification;Referenceproteome;Signal;Transmembrane;Transmembranehelix			2	2	2	10.9	10.9	10.9	34.576	0	28.359	891190000	16	0.781013	0.826391	0.836692	A0A087WV34;Q8WWB7-2;Q8WWB7;X6R6A3;A0A087X0W3	A0A087WV34;Q8WWB7-2;Q8WWB7;X6R6A3;A0A087X0W3	Glycosylated lysosomal membrane protein	GLMP
0.944136	0.983617	0.930196	0.989274	1.10156	1.0882	1.01714	1.03543	0.979254	0.978117	1.0159	0.927343	1.02804	1.00971	0.976499	1.01477	1.02141	1.00546	1.01169	0.990923	0.997808	1.0167	0.866453	0.961586	biological regulation;cell cycle;cell cycle phase;cell cycle process;cell division;cellular component organization;cellular component organization at cellular level;cellular component organization or biogenesis;cellular component organization or biogenesis at cellular level;cellular process;G2/M transition of mitotic cell cycle;mitosis;mitotic cell cycle;nuclear division;organelle fission;organel…	binding;enzyme binding;kinase binding;protein binding;protein kinase binding	cell part;cytoplasmic part;cytoskeletal part;cytosol;intracellular non-membrane-bounded organelle;intracellular organelle;intracellular organelle part;intracellular part;meiotic spindle;non-membrane-bounded organelle;organelle;organelle part;spindle	Alternativesplicing;Cellcycle;Celldivision;Completeproteome;Mitosis;Phosphoprotein;Polymorphism;Proteomicsidentification;Referenceproteome			2	2	2	3.2	3.2	3.2	67.671	0	7.9432	161230000	8	0.762957	0.585309	0.886227	B5LMG6;A0A087WV86;Q6PGQ7-2;Q6PGQ7;H3BLY2	B5LMG6;A0A087WV86;Q6PGQ7-2;Q6PGQ7;H3BLY2	Protein aurora borealis	C13orf34;BORA
1.09751	1.17997	1.06277	1.07751	1.11044	1.12875	1.00456	1.02884	1.00546	0.989327	0.982369	1.14359	1.02001	1.01901	0.999492	1.01599	0.922765	0.983959	1.03255	1.03321	0.941759	0.971361	1.18787	1.10354	biological regulation;cellular lipid metabolic process;cellular metabolic process;cellular process;cellular response to stimulus;lipid metabolic process;membrane lipid metabolic process;metabolic process;primary metabolic process;regulation of biological process;regulation of cellular process;response to stimulus;signal transduction;sphingolipid metabolic process		cell part;integral to membrane;intrinsic to membrane;membrane;membrane part	Alternativesplicing;Completeproteome;Glycoprotein;Membrane;Phosphoprotein;Polymorphism;Proteomicsidentification;Referenceproteome;Transmembrane;Transmembranehelix			6	6	6	6	6	6	125.38	0	6.0043	158110000	9	0.313467	0.504485	0.950335	A0A087WVA8;Q8IWB9;Q8IWB9-2;J3KRZ8	A0A087WVA8;Q8IWB9;Q8IWB9-2;J3KRZ8	Testis-expressed sequence 2 protein	TEX2
0.999536	1.03968	1.09513	1.03479	1.10668	1.12066	1.0209	1.03703	1.01175	1.00778	1.00827	1.10353	1.02036	1.01529	0.983772	1.0015	0.982384	0.992984	1.00644	1.03092	0.965106	0.989749	1.0516	1.00347	cellular macromolecule metabolic process;cellular metabolic process;cellular nitrogen compound metabolic process;cellular process;macromolecule metabolic process;metabolic process;nitrogen compound metabolic process;nucleic acid metabolic process;nucleobase-containing compound metabolic process;primary metabolic process;RNA metabolic process;RNA secondary structure unwinding	adenyl nucleotide binding;adenyl ribonucleotide binding;ATP binding;ATPase activity;ATPase activity, coupled;ATP-dependent helicase activity;ATP-dependent RNA helicase activity;binding;catalytic activity;helicase activity;hydrolase activity;hydrolase activity, acting on acid anhydrides;hydrolase activity, acting on acid anhydrides, in phosphorus-containing anhydrides;nucleic acid binding;nucleosi…	cell part;cytoplasm;intracellular membrane-bounded organelle;intracellular non-membrane-bounded organelle;intracellular organelle;intracellular organelle part;intracellular part;membrane;membrane-bounded organelle;non-membrane-bounded organelle;nuclear part;nucleolus;nucleus;organelle;organelle part;plasma membrane	3D-structure;ATP-binding;Completeproteome;Helicase;Hydrolase;Nucleotide-binding;Nucleus;Phosphoprotein;Proteomicsidentification;Referenceproteome;RNA-binding			13	11	11	17.7	14	14	82.226	0	52.497	836170000	42	0.180033	0.469727	0.644562	A0A087WVC1;A0A087WVB0;Q9BQ39	A0A087WVC1;A0A087WVB0;Q9BQ39	ATP-dependent RNA helicase DDX50	DDX50
0.962192	1.01459	1.08718	1.05659	1.08903	1.07038	1.0164	1.02715	0.991717	0.988135	1.00601	1.09183	1.02522	1.01697	0.989714	1.02177	0.968268	0.989084	1.03738	1.00497	0.989453	1.02491	1.12128	1.07257	cellular metabolic process;cellular nitrogen compound metabolic process;cellular process;metabolic process;nitrogen compound metabolic process;nucleobase-containing compound metabolic process;nucleobase-containing small molecule metabolic process;nucleoside phosphate metabolic process;nucleotide metabolic process;nucleotide phosphorylation;phosphate-containing compound metabolic process;phosphoru…	adenyl nucleotide binding;adenyl ribonucleotide binding;adenylate kinase activity;ATP binding;ATPase activity;binding;catalytic activity;hydrolase activity;hydrolase activity, acting on acid anhydrides;hydrolase activity, acting on acid anhydrides, in phosphorus-containing anhydrides;kinase activity;nucleobase-containing compound kinase activity;nucleoside-triphosphatase activity;nucleotide bindi…	Cajal body;cell part;intracellular organelle part;intracellular part;membrane;nuclear body;nuclear part;nucleoplasm;nucleoplasm part;organelle part	3D-structure;Alternativesplicing;ATP-binding;Completeproteome;Kinase;Nucleotide-binding;Nucleus;Referenceproteome;Transferase			3	3	3	31.2	31.2	31.2	12.545	0	7.3589	564290000	11	0.302166	0.824659	0.990363	A0A087WVD7;Q9Y3D8;A0A087WY94;Q9Y3D8-2;D6RDH4	A0A087WVD7;Q9Y3D8;A0A087WY94;Q9Y3D8-2	Adenylate kinase isoenzyme 6	TAF9;AK6
1.03157	1.07213	0.968332	0.996927	1.13572	1.11142	1.04376	0.986475	0.939287	0.933897	0.926509	0.927482	1.01246	1.00908	0.97298	1.00518	1.02546	1.07097	1.08274	1.08985	1.01548	1.07311	0.962464	1.06059	biological regulation;carbohydrate metabolic process;cell communication;cell differentiation;cellular carbohydrate metabolic process;cellular developmental process;cellular macromolecule metabolic process;cellular metabolic process;cellular process;cellular protein metabolic process;cellular response to chemical stimulus;cellular response to external stimulus;cellular response to extracellular st…	binding;core promoter proximal region DNA binding;core promoter proximal region sequence-specific DNA binding;DNA binding;nucleic acid binding;p53 binding;protein binding;protein binding transcription factor activity;regulatory region DNA binding;regulatory region nucleic acid binding;RNA polymerase II core promoter proximal region sequence-specific DNA binding;RNA polymerase II regulatory region…	apical plasma membrane;cell part;cell surface;chromatin;chromosomal part;cytoplasm;cytoplasmic part;extracellular membrane-bounded organelle;extracellular organelle;extracellular region part;extracellular space;extracellular vesicular exosome;Golgi apparatus part;Golgi lumen;integral to membrane;integral to plasma membrane;intracellular organelle lumen;intracellular organelle part;intracellular p…	3D-structure;Alternativesplicing;Autocatalyticcleavage;Cellmembrane;Completeproteome;Cytoplasm;Directproteinsequencing;Disulfidebond;Glycoprotein;Lipoprotein;Membrane;Nucleus;Palmitate;Phosphoprotein;Polymorphism;Proteomicsidentification;Referenceproteome;Repeat;Secreted;Signal;Transmembrane;Transmembranehelix;Tumorsuppressor			3	3	3	15.8	15.8	15.8	25.565	0	7.034	199780000	8	0.257959	0.563109	0.863359	A0A087WVJ0;A0A0A0MSH4;A0A087X2A4;A0A087WWM1;P15941-7;P15941-17;P15941-11;P15941-8;P15941-4;P15941-3;P15941;P15941-2;A0A087X061;A0A087WZZ6;Q7Z536;B1AVQ7;A0A0A0MRB3;P15941-13;A6ZIE4;A6ZIE3;A0A087X0L2;P15941-12;P15941-16;P15941-9;P15941-10;P15941-15;P15941-6	A0A087WVJ0;A0A0A0MSH4;A0A087X2A4;A0A087WWM1;P15941-7;P15941-17;P15941-11;P15941-8;P15941-4;P15941-3;P15941;P15941-2;A0A087X061;A0A087WZZ6;Q7Z536;B1AVQ7;A0A0A0MRB3;P15941-13	Mucin-1;Mucin-1 subunit alpha;Mucin-1 subunit beta	MUC1
0.980164	1.01813	0.893712	0.940105	1.00444	1.00847	1.01793	1.05145	0.975478	0.942367	1.03564	0.950808	1.05242	1.0434	1.04409	1.03513	1.09968	1.05843	0.888098	0.922625	1.06256	1.06958	0.771072	0.866521		catalytic activity;methyltransferase activity;transferase activity;transferase activity, transferring one-carbon groups	cell part;cytoplasm;intracellular part	Acetylation;Completeproteome;Cytoplasm;Methyltransferase;Phosphoprotein;Polymorphism;Proteomicsidentification;Referenceproteome;S-adenosyl-L-methionine;Transferase			1	1	1	14.4	14.4	14.4	11.347	0	27.303	77783000	4	0.986332	0.614867	0.951496	G3V238;A0A087WVN1;Q5JPI9	G3V238;A0A087WVN1;Q5JPI9	Protein-lysine N-methyltransferase METTL10	METTL10
0.976839	1.00837	1.02851	1.0282	1.07652	1.09786	1.00709	1.01492	1.0027	0.989972	1.01493	1.07374	1.02282	1.013	0.991615	1.01267	0.980419	1.02094	1.01401	1.01406	0.997902	1.02289	1.00305	1.02396	actin cytoskeleton organization;actin filament organization;actin filament-based process;anatomical structure formation involved in morphogenesis;anatomical structure morphogenesis;biological adhesion;biological regulation;cell adhesion;cell communication;cell migration;cell morphogenesis;cell morphogenesis involved in differentiation;cell motility;cell-cell adhesion;cell-cell signaling;cellular …	binding;calcium ion binding;cation binding;ion binding;metal ion binding	adherens junction;anchoring junction;cell junction;cell part;cell projection;cell-cell junction;cell-substrate adherens junction;cell-substrate junction;cytoplasmic part;dendrite;extracellular membrane-bounded organelle;extracellular organelle;extracellular region part;extracellular vesicular exosome;filopodium;focal adhesion;integral to membrane;integral to plasma membrane;intracellular membrane…	Alternativesplicing;Calcium;Celladhesion;Cellmembrane;Completeproteome;Cytoplasm;Developmentalprotein;Disulfidebond;EGF-likedomain;Glycoprotein;Membrane;Nucleus;Polymorphism;Proteomicsidentification;Referenceproteome;Repeat;Signal;Transmembrane;Transmembranehelix			49	49	49	12.4	12.4	12.4	506.37	0	169.64	4751400000	120	0.0670861	0.122839	0.290473	A0A087WVP1;Q14517;D6RCE4;H0Y9C8;H0Y9H4;E9PQ73;Q8TDW7-3;Q8TDW7;H0Y8F5	A0A087WVP1;Q14517	Protocadherin Fat 1;Protocadherin Fat 1, nuclear form	FAT1
1.01209	1.04349	1.08041	1.02961	1.05831	1.05725	1.00623	1.01931	1.01049	1.00573	1.01301	1.13655	1.01794	1.01227	0.990744	1.01325	0.968898	0.985421	1.01859	1.04187	0.959374	0.978842	1.08462	1.01399	antigen processing and presentation;antigen processing and presentation of exogenous antigen;antigen processing and presentation of exogenous peptide antigen;antigen processing and presentation of exogenous peptide antigen via MHC class II;antigen processing and presentation of peptide antigen;antigen processing and presentation of peptide antigen via MHC class II;antigen processing and presentat…	binding;clathrin binding;clathrin light chain binding;double-stranded RNA binding;enzyme binding;kinase binding;nucleic acid binding;protein binding;protein kinase binding;RNA binding;structural molecule activity	adherens junction;anchoring junction;cell junction;cell part;cell-substrate adherens junction;cell-substrate junction;clathrin coat;clathrin coat of coated pit;clathrin coat of trans-Golgi network vesicle;clathrin coated vesicle membrane;clathrin complex;clathrin vesicle coat;clathrin-coated endocytic vesicle membrane;clathrin-coated vesicle;coated vesicle;coated vesicle membrane;cytoplasm;cytopl…	3D-structure;Acetylation;Alternativesplicing;Coatedpit;Completeproteome;Cytoplasmicvesicle;Directproteinsequencing;Membrane;Phosphoprotein;Proteomicsidentification;Referenceproteome;Repeat	Bacterial invasion of epithelial cells;Endocrine and other factor-regulated calcium reabsorption;Endocytosis;Huntington's disease;Lysosome		72	72	57	39.5	39.5	32.9	192.06	0	323.31	99007000000	704	0.289576	0.533198	0.755168	A0A087WVQ6;Q00610-2;Q00610;J3KS13;K7EJJ5;J3KRF5;J3KSQ2;J3QL20;F5H5N6;A0A087WV74;A0A087WXH4	A0A087WVQ6;Q00610-2;Q00610	Clathrin heavy chain;Clathrin heavy chain 1	CLTC
1.02159	1.05323	1.14319	1.06376	1.16948	1.20718	1.00328	1.01529	1.01574	1.00564	0.995748	1.20476	1.01235	1.01725	0.989972	1.00797	0.952909	0.994697	1.00025	1.02347	0.96544	0.965839	1.08245	1.02742	actin cytoskeleton organization;actin filament-based process;biological regulation;cellular component organization;cellular component organization at cellular level;cellular component organization or biogenesis;cellular component organization or biogenesis at cellular level;cellular process;cytoskeleton organization;organelle organization;positive regulation of biological process;positive regulat…	binding;cation binding;ion binding;metal ion binding	cell part;cell projection part;cytoplasm;cytoplasmic part;intracellular membrane-bounded organelle;intracellular non-membrane-bounded organelle;intracellular organelle;intracellular organelle part;intracellular part;membrane-bounded organelle;neuron projection terminus;non-membrane-bounded organelle;nuclear part;nucleolus;nucleus;organelle;organelle part;perinuclear region of cytoplasm	Alternativesplicing;Completeproteome;Cytoplasm;Metal-binding;Nucleus;Phosphoprotein;Proteomicsidentification;Referenceproteome;Zinc			3	3	3	11.9	11.9	11.9	26.879	0	4.4202	271410000	9	0.129811	0.470034	0.373016	A0A087WVS8;Q70IA6-2;Q70IA6;Q70IA6-3	A0A087WVS8;Q70IA6-2;Q70IA6;Q70IA6-3	MOB kinase activator 2	MOB2
0.981947	1.03485	1.09984	1.06968	1.19086	1.19665	0.998884	1.01421	0.999759	0.988132	1.03985	1.06075	1.02672	1.01698	1.00226	1.00222	0.981477	0.995306	0.990293	0.953818	1.00686	1.03471	0.992853	0.998023	amine transport;amino acid transport;biological regulation;carboxylic acid transport;cellular process;cytoplasmic sequestering of protein;cytoplasmic sequestering of transcription factor;D-amino acid transport;D-serine transport;establishment of localization;maintenance of location;maintenance of location in cell;maintenance of protein location;maintenance of protein location in cell;negative reg…		cell part;cytoplasm;cytoplasmic part;cytosol;Golgi apparatus;intracellular membrane-bounded organelle;intracellular organelle;intracellular part;membrane-bounded organelle;organelle;perinuclear region of cytoplasm	ANKrepeat;Completeproteome;Cytoplasm;Phosphoprotein;Polymorphism;Proteomicsidentification;Referenceproteome;Repeat	Adipocytokine signaling pathway;B cell receptor signaling pathway;Neurotrophin signaling pathway;T cell receptor signaling pathway		4	4	4	10.4	10.4	10.4	52.696	0	23.568	592970000	17	0.168849	0.776916	0.837675	A0A087WVX9;O00221;Q7LC14;H3BNC2	A0A087WVX9;O00221;Q7LC14	NF-kappa-B inhibitor epsilon	NFKBIE
0.997914	1.03609	1.04437	1.02252	1.05631	1.06196	1.00092	1.01695	0.996581	0.993403	1.03883	1.1567	1.02007	1.01969	0.988468	1.01299	0.95226	0.991999	1.02199	1.04927	0.940411	0.954209	1.07391	1.00079	biological regulation;biosynthetic process;cellular biosynthetic process;cellular macromolecule biosynthetic process;cellular macromolecule metabolic process;cellular metabolic process;cellular nitrogen compound metabolic process;cellular process;cellular response to stimulus;cellular response to stress;defense response;developmental process;DNA metabolic process;DNA repair;gene expression;immune…	binding;catalytic activity;DNA binding;DNA-directed RNA polymerase activity;nucleic acid binding;nucleotidyltransferase activity;RNA polymerase activity;transferase activity;transferase activity, transferring phosphorus-containing groups	cell part;cytoplasmic part;cytosol;DNA-directed RNA polymerase complex;DNA-directed RNA polymerase I complex;DNA-directed RNA polymerase II, core complex;DNA-directed RNA polymerase III complex;intracellular membrane-bounded organelle;intracellular organelle;intracellular organelle part;intracellular part;macromolecular complex;membrane-bounded organelle;nuclear DNA-directed RNA polymerase comple…	Acetylation;Completeproteome;Directproteinsequencing;DNA-directedRNApolymerase;Host-virusinteraction;Nucleus;Polymorphism;Proteomicsidentification;Referenceproteome;Transcription	Cytosolic DNA-sensing pathway;Huntington's disease;Purine metabolism;Pyrimidine metabolism;RNA polymerase		7	7	7	38	38	38	21.459	0	15.434	1972300000	27	0.0860926	0.340063	0.714861	A0A087WVZ9;P19388;A0A087WWX0;A0A0A0MQR7;A0A087WVN5;K7EQN2;K7EJ87	A0A087WVZ9;P19388;A0A087WWX0;A0A0A0MQR7	DNA-directed RNA polymerases I, II, and III subunit RPABC1	POLR2E
1.01194	1.02992	1.13953	1.05232	1.11764	1.10372	1.01383	1.03511	1.01062	1.00644	1.00738	1.11413	1.01829	1.00779	1.00242	1.01077	1.08002	0.978672	1.03787	1.09779	0.90266	0.916398	1.03496	0.970565	cellular process;establishment of localization;establishment of localization in cell;exocytosis;secretion;secretion by cell;transport;vesicle-mediated transport	catalytic activity;dipeptidase activity;exopeptidase activity;hydrolase activity;peptidase activity;peptidase activity, acting on L-amino acid peptides		Alternativesplicing;Completeproteome;Polymorphism;Proteomicsidentification;Referenceproteome			3	3	3	9.3	9.3	9.3	49.154	0	5.9822	85266000	5	0.214301	0.979176	0.80258	A0A087WW14;Q0VDG4-2;Q0VDG4;F8W0M9;C9JID8	A0A087WW14;Q0VDG4-2;Q0VDG4	Secernin-3	SCRN3
0.942241	1.07657	0.991706	1.02014	1.0459	1.06339	1.00172	1.01315	1.00566	0.983893	1.05666	1.13464	1.05537	1.05743	1.00064	0.998197	0.929458	0.981559	1.00026	0.992087	1.00347	1.00287	1.03368	1.03234	biological regulation;regulation of biological process;regulation of biosynthetic process;regulation of cellular biosynthetic process;regulation of cellular macromolecule biosynthetic process;regulation of cellular metabolic process;regulation of cellular process;regulation of gene expression;regulation of macromolecule biosynthetic process;regulation of macromolecule metabolic process;regulation…	binding;cation binding;ion binding;metal ion binding;transition metal ion binding;zinc ion binding	cell part;intracellular membrane-bounded organelle;intracellular organelle;intracellular part;membrane-bounded organelle;nucleus;organelle	Chromosomalrearrangement;Completeproteome;Metal-binding;Nucleus;Phosphoprotein;Polymorphism;Proteomicsidentification;Proto-oncogene;Referenceproteome;Repeat;Zinc;Zinc-finger			2	2	2	1.6	1.6	1.6	112.05	0	3.332	75248000	5	0.355741	0.216786	0.618177	A0A087WW39;P55198;A0A087WVY1;Q6P2C6	A0A087WW39;P55198;A0A087WVY1;Q6P2C6	Protein AF-17	MLLT6
0.98346	1.02275	1.06681	1.00608	1.06436	1.059	1.04173	0.966246	0.987693	0.987881	0.917373	1.18074	1.0314	1.02789	1.00516	1.03204	1.00889	1.00906	1.0063	1.01971	0.945928	0.964784	1.03474	1.00417	biological regulation;cation homeostasis;cellular cation homeostasis;cellular chemical homeostasis;cellular homeostasis;cellular ion homeostasis;cellular iron ion homeostasis;cellular metal ion homeostasis;cellular process;chemical homeostasis;cofactor transport;establishment of localization;heme transport;homeostatic process;ion homeostasis;iron ion homeostasis;metabolic process;metal ion homeos…	active transmembrane transporter activity;adenyl nucleotide binding;adenyl ribonucleotide binding;ATP binding;ATPase activity;ATPase activity, coupled;ATPase activity, coupled to movement of substances;ATPase activity, coupled to transmembrane movement of substances;binding;catalytic activity;cofactor transporter activity;heme transporter activity;hydrolase activity;hydrolase activity, acting on …	cell part;cytoplasmic part;integral to membrane;intracellular membrane-bounded organelle;intracellular organelle;intracellular organelle part;intracellular part;intrinsic to membrane;membrane;membrane part;membrane-bounded organelle;mitochondrial inner membrane;mitochondrial membrane;mitochondrial part;mitochondrion;organelle;organelle inner membrane;organelle membrane;organelle part	Acetylation;Alternativesplicing;ATP-binding;Completeproteome;Diseasemutation;Membrane;Mitochondrion;Mitochondrioninnermembrane;Nucleotide-binding;Phosphoprotein;Polymorphism;Proteomicsidentification;Referenceproteome;Transitpeptide;Transmembrane;Transmembranehelix;Transport	ABC transporters		4	4	4	6.1	6.1	6.1	77.12	0	10.457	195930000	12	0.32178	0.417457	0.226597	B4DGL8;A0A087WW65;O75027-3;O75027;O75027-2;E9PJR8	B4DGL8;A0A087WW65;O75027-3;O75027;O75027-2	ATP-binding cassette sub-family B member 7, mitochondrial	ABCB7
0.993441	1.02346	1.0712	1.03426	1.06887	1.07495	1.00287	1.01405	1.00358	1.0006	1.01312	1.11837	1.0201	1.01344	0.997554	1.01238	0.95781	0.989902	1.01278	1.01524	0.978881	0.996388	1.0581	1.01105	activation of immune response;activation of innate immune response;anaphase-promoting complex-dependent proteasomal ubiquitin-dependent protein catabolic process;antigen processing and presentation;antigen processing and presentation of exogenous antigen;antigen processing and presentation of exogenous peptide antigen;antigen processing and presentation of exogenous peptide antigen via MHC class …	enzyme regulator activity	cell part;cytoplasmic part;cytosol;extracellular membrane-bounded organelle;extracellular organelle;extracellular region part;extracellular vesicular exosome;intracellular organelle part;intracellular part;macromolecular complex;membrane;membrane-bounded organelle;membrane-bounded vesicle;nuclear part;nucleoplasm;organelle;organelle part;proteasome accessory complex;proteasome complex;proteasome …	Acetylation;Alternativesplicing;Completeproteome;Phosphoprotein;Proteasome;Proteomicsidentification;Referenceproteome;Repeat	Proteasome		35	35	35	37.4	37.4	37.4	105.85	0	252.05	22969000000	224	0.256619	0.447872	0.587953	A0A087WW66;Q99460;Q99460-2;H7BZR6;C9J9M4;H7C378	A0A087WW66;Q99460;Q99460-2	26S proteasome non-ATPase regulatory subunit 1	PSMD1
0.9881	1.01876	0.976215	0.983473	1.06709	1.06151	1.00793	1.01909	0.994849	0.97178	1.01938	0.913085	1.02308	1.02555	0.997411	1.00565	1.05302	1.01735	0.979946	0.974364	0.996176	1.01409	0.865578	0.956069	actin cytoskeleton organization;actin filament organization;actin filament-based movement;actin filament-based process;actin polymerization or depolymerization;biological regulation;cellular component assembly;cellular component movement;cellular component organization;cellular component organization at cellular level;cellular component organization or biogenesis;cellular component organization o…	actin binding;binding;cytoskeletal protein binding;profilin binding;protein binding	actin cytoskeleton;actin filament;cell part;cell projection;cytoplasmic membrane-bounded vesicle;cytoplasmic part;cytoplasmic vesicle;cytoskeletal part;cytoskeleton;cytosol;intracellular membrane-bounded organelle;intracellular non-membrane-bounded organelle;intracellular organelle;intracellular organelle part;intracellular part;macromolecular complex;membrane-bounded organelle;membrane-bounded v…	3D-structure;Actin-binding;Alternativesplicing;Cellprojection;Completeproteome;Cytoplasm;Cytoplasmicvesicle;Cytoskeleton;Phosphoprotein;Polymorphism;Proteomicsidentification;Referenceproteome;Repeat			4	4	4	6.7	6.7	6.7	50.413	0	5.5876	441690000	18	0.886277	0.88509	0.965464	A0A087WW70;O43516-4;O43516-2;O43516;O43516-3;E9PB87;C9JTB9;B8ZZ90;C9JB04	A0A087WW70;O43516-4;O43516-2;O43516;O43516-3;E9PB87	WAS/WASL-interacting protein family member 1	WIPF1
0.958985	0.996445	0.979446	0.981382	1.04842	1.07443	1.00806	1.00437	1.0007	0.986145	1.03536	1.00017	1.05507	1.05122	0.999684	1.02447	0.997203	1.00941	1.00315	0.97252	1.00582	1.02816	0.834001	0.957929	biological regulation;cellular component movement;cellular component organization;cellular component organization at cellular level;cellular component organization or biogenesis;cellular component organization or biogenesis at cellular level;cellular process;cellular response to stimulus;cytoskeleton-dependent intracellular transport;establishment of Golgi localization;establishment of localizati…	enzyme activator activity;enzyme regulator activity;GTPase activator activity;GTPase regulator activity;nucleoside-triphosphatase regulator activity	cell junction;cell part;cytoplasmic part;cytoplasmic vesicle membrane;cytoplasmic vesicle part;cytoskeleton;Golgi apparatus;Golgi apparatus part;Golgi membrane;intracellular;intracellular membrane-bounded organelle;intracellular non-membrane-bounded organelle;intracellular organelle;intracellular organelle part;intracellular part;membrane;membrane-bounded organelle;non-membrane-bounded organelle;…	3D-structure;Alternativesplicing;Celljunction;Completeproteome;Cytoplasm;Cytoplasmicvesicle;Cytoskeleton;Golgiapparatus;GTPaseactivation;Isopeptidebond;Membrane;Phosphoprotein;Polymorphism;Proteomicsidentification;Referenceproteome;Ublconjugation			4	4	4	3.6	3.6	3.6	155.98	0	25.852	191690000	11	0.96399	0.404926	0.614635	A0A087WW76;Q5T5U3;E7ESW5;F8W9U9;Q5T5U3-3	A0A087WW76;Q5T5U3;E7ESW5;F8W9U9;Q5T5U3-3	Rho GTPase-activating protein 21	ARHGAP21
0.99366	1.00559	1.12223	1.07661	1.10827	1.06647	1.00674	1.01164	0.998275	0.982865	0.995128	1.04497	1.03981	1.02225	0.98916	1.01528	1.02389	1.00045	1.02128	1.02912	0.956183	0.984212	1.00701	0.972906	actin cytoskeleton organization;actin filament-based process;anatomical structure morphogenesis;axonogenesis;biological regulation;cell part morphogenesis;cell projection morphogenesis;cell projection organization;cellular component assembly;cellular component morphogenesis;cellular component organization;cellular component organization at cellular level;cellular component organization or biogene…	binding;enzyme activator activity;enzyme binding;enzyme regulator activity;GTPase activator activity;GTPase regulator activity;kinase binding;nucleoside-triphosphatase regulator activity;protein binding;protein kinase binding;structural molecule activity	axon;cell cortex part;cell part;cell projection;cortical actin cytoskeleton;cortical cytoskeleton;cytoplasm;cytoplasmic part;cytoskeletal part;cytoskeleton;early endosome membrane;endosomal part;endosome membrane;Golgi apparatus part;Golgi cis cisterna;Golgi cisterna;Golgi membrane;intracellular non-membrane-bounded organelle;intracellular organelle;intracellular organelle part;intracellular part…	Cellprojection;Completeproteome;Cytoplasm;Cytoskeleton;Endosome;Exocytosis;Golgiapparatus;Membrane;Phosphoprotein;Polymorphism;Proteomicsidentification;Referenceproteome;Repeat;WDrepeat	Tight junction		11	11	11	10.4	10.4	10.4	114.43	0	40.356	444620000	19	0.638685	0.998506	0.990752	A0A087WW77;Q15334	A0A087WW77;Q15334	Lethal(2) giant larvae protein homolog 1	LLGL1
0.931295	0.948165	1.01191	1.02759	1.01046	1.05327	1.01169	1.02448	0.992108	0.963444	1.05591	1.01843	1.07591	1.04091	1.02936	1.03787	0.990683	1.01128	0.969864	0.993592	1.01244	1.0365	0.933374	1.03899				Completeproteome;Proteomicsidentification;Referenceproteome			2	1	1	11.8	6.8	6.8	25.01	0.0028464	1.8782	491740000	11	0.775775	0.499129	0.804014	A0A087WWB6	A0A087WWB6	Transgelin	TAGLN3
0.998065	1.03474	1.01678	1.01759	1.06508	1.05708	0.995298	1.01252	1.00777	0.999009	0.986963	1.05925	1.00995	1.01101	1.00286	1.0245	1.02893	0.991842	1.01694	1.04985	0.952879	0.972476	1.03574	1.00173	cellular process;ER to Golgi vesicle-mediated transport;establishment of localization;establishment of localization in cell;Golgi vesicle transport;intracellular transport;transport;vesicle-mediated transport		cell part;cytoplasmic part;cytosol;endoplasmic reticulum;Golgi apparatus;Golgi apparatus part;Golgi membrane;intracellular membrane-bounded organelle;intracellular organelle;intracellular organelle part;intracellular part;macromolecular complex;membrane;membrane-bounded organelle;organelle;organelle membrane;organelle part;protein complex;TRAPP complex	3D-structure;Alternativesplicing;Completeproteome;Endoplasmicreticulum;ER-Golgitransport;Golgiapparatus;Lipoprotein;Palmitate;Proteomicsidentification;Referenceproteome;Transport			9	9	9	41.5	41.5	41.5	21.231	0	47.439	3268500000	44	0.0769588	0.319953	0.812376	A0A087WWM0;O43617;O43617-2;A0A087WYS5;A6NKE1	A0A087WWM0;O43617;O43617-2;A0A087WYS5;A6NKE1	Trafficking protein particle complex subunit 3	TRAPPC3
1.01466	1.03758	1.05566	1.01612	1.07793	1.08928	1.01583	1.01634	1.01569	1.00113	1.05001	1.1059	1.01979	1.02498	0.99616	1.01611	1.04445	0.999558	1.01382	1.03097	0.965111	0.977247	1.00522	0.938961	biosynthetic process;cellular aromatic compound metabolic process;cellular biosynthetic process;cellular metabolic compound salvage;cellular metabolic process;cellular nitrogen compound biosynthetic process;cellular nitrogen compound metabolic process;cellular process;GMP metabolic process;heterocycle biosynthetic process;heterocycle metabolic process;metabolic process;nitrogen compound metabolic…	binding;catalytic activity;cation binding;GMP reductase activity;ion binding;metal ion binding;oxidoreductase activity;oxidoreductase activity, acting on NADH or NADPH;oxidoreductase activity, acting on NADH or NADPH, nitrogenous group as acceptor	cell part;cytoplasmic part;cytosol;intracellular part	3D-structure;Acetylation;Alternativesplicing;Completeproteome;Metal-binding;NADP;Oxidoreductase;Polymorphism;Potassium;Proteomicsidentification;Purinemetabolism;Referenceproteome	Purine metabolism		7	7	6	26	26	22.9	33.921	0	23.733	1157500000	28	0.0196554	0.644181	0.678773	H0YMB3;A0A087WWM4;F8WAN9;Q9P2T1-3;Q9P2T1;H0YLV5;H0YNJ6;Q9P2T1-2;H0YK13;H0YLB8;H0YNH0;H0YN22;H0YMG3;H0YNS9;H0YMR9;H0YK71;H0YMV5;H0YKE1;H0YKK3;H0YN74	H0YMB3;A0A087WWM4;F8WAN9;Q9P2T1-3;Q9P2T1;H0YLV5;H0YNJ6;Q9P2T1-2	GMP reductase;GMP reductase 2	GMPR2
0.971961	1.00524	1.04852	1.01874	1.03785	1.03744	1.01025	1.01304	0.991855	0.981898	1.03431	1.02953	1.02351	1.01695	0.989988	1.01118	1.00031	0.992113	0.994846	0.9892	0.994535	1.00737	0.982621	0.989599	anatomical structure development;anatomical structure morphogenesis;biological regulation;blood vessel development;branching morphogenesis of a tube;cardiac septum morphogenesis;developmental process;hemopoietic or lymphoid organ development;morphogenesis of a branching epithelium;morphogenesis of a branching structure;morphogenesis of an epithelium;multicellular organismal process;negative regul…	binding;nucleic acid binding;nucleotide binding	cell part;intracellular organelle part;intracellular part;membrane;nuclear membrane;nuclear part;nucleoplasm;organelle membrane;organelle part	Acetylation;Alternativeinitiation;Alternativesplicing;Chromosomalrearrangement;Completeproteome;Host-virusinteraction;Membrane;Nucleus;Phosphoprotein;Proteomicsidentification;Proto-oncogene;Referenceproteome;Repeat;RNA-binding			18	18	17	23.2	23.2	22.4	102.13	0	323.31	2708000000	63	0.496021	0.781012	0.928199	A0A087WWP4;Q96T37-4;Q96T37-2;Q96T37-3;Q96T37	A0A087WWP4;Q96T37-4;Q96T37-2;Q96T37-3;Q96T37	Putative RNA-binding protein 15	RBM15
0.982209	1.01961	1.0038	1.00252	1.06124	1.09196	0.999409	1.00943	0.988817	0.979043	1.0408	1.05324	1.02087	1.00924	1.00341	1.03103	0.968037	1.01028	0.999689	0.978366	0.994484	1.01302	0.980639	0.990996			cell part;intracellular membrane-bounded organelle;intracellular organelle;intracellular part;membrane-bounded organelle;nucleus;organelle	Alternativesplicing;Completeproteome;Nucleus;Phosphoprotein;Proteomicsidentification;Referenceproteome			3	2	2	4	3.1	3.1	84.975	0	16.117	232860000	8	0.120095	0.226718	0.425727	A0A087WWP8;Q5VWQ0;Q5VWQ0-4	A0A087WWP8;Q5VWQ0	Round spermatid basic protein 1	RSBN1
0.963665	0.982525	0.98983	1.02452	1.13017	1.12492	1.00776	1.00099	0.969374	0.947166	1.07769	0.888051	1.04558	1.03983	0.999703	1.00386	1.00409	1.03021	0.996029	0.957919	1.04359	1.04953	0.949679	0.998637			cell part;cytoplasm;intracellular part	Acetylation;Alternativesplicing;Completeproteome;Cytoplasm;Polymorphism;Proteomicsidentification;Referenceproteome			3	3	3	56.5	56.5	56.5	7.4817	0	6.0677	209160000	8	0.60379	0.691584	0.88127	A0A087WWQ8;Q9BWK5	A0A087WWQ8;Q9BWK5	Modulator of retrovirus infection homolog	C7orf49;MRI
0.968075	0.994085	1.07618	1.03658	1.0931	1.09167	1.00527	1.00806	1.00606	0.987309	0.998439	1.06989	1.0166	1.01214	0.990726	1.01247	0.956807	0.998232	1.00697	0.987048	0.993468	1.02001	1.02621	1.00311	apoptosis;biological regulation;biosynthetic process;cell death;cellular biosynthetic process;cellular macromolecule biosynthetic process;cellular macromolecule metabolic process;cellular metabolic process;cellular nitrogen compound metabolic process;cellular process;cellular response to stimulus;cellular response to stress;death;DNA metabolic process;establishment of localization;establishment o…	binding;DNA binding;nucleic acid binding;RNA binding	cell part;cytoplasm;extracellular region part;intercellular bridge;intracellular membrane-bounded organelle;intracellular organelle;intracellular organelle part;intracellular part;macromolecular complex;membrane-bounded organelle;nuclear body;nuclear matrix;nuclear part;nuclear speck;nucleoplasm;nucleoplasm part;nucleus;organelle;organelle part;protein complex;THO complex;THO complex part of tran…	3D-structure;Acetylation;Alternativesplicing;Apoptosis;Completeproteome;Cytoplasm;DNA-binding;mRNAprocessing;mRNAsplicing;mRNAtransport;Nucleus;Phosphoprotein;Proteomicsidentification;Referenceproteome;RNA-binding;Transcription;Transcriptionregulation;Transport;Ublconjugation	RNA transport;Spliceosome		17	17	17	29.4	29.4	29.4	75.651	0	71.277	2823200000	79	0.230899	0.592902	0.572483	A0A087WWS1;Q96FV9;R4GMN4;Q96FV9-2;A0A087WY84;J3KRD7;R4GN58;J3QQZ3;J3KT14	A0A087WWS1;Q96FV9	THO complex subunit 1	THOC1
0.98056	1.01581	1.08104	1.03663	1.07951	1.09409	0.99431	1.01119	1.01287	1.0062	1.00365	1.14999	1.01947	1.00698	0.993108	1.01449	0.91682	0.987118	1.01138	0.991347	0.995037	1.01452	1.05639	1.02022	biological regulation;cell activation;cell activation involved in immune response;cell killing;cellular process;establishment of localization;establishment of localization in cell;establishment of protein localization;exocytosis;immune effector process;immune system process;leukocyte activation;leukocyte activation involved in immune response;leukocyte degranulation;leukocyte mediated cytotoxicit…	binding;protein binding;SNARE binding;syntaxin binding;syntaxin-3 binding	apical plasma membrane;azurophil granule;cell part;cytolytic granule;cytoplasmic membrane-bounded vesicle;cytoplasmic part;cytoplasmic vesicle;cytosol;extracellular membrane-bounded organelle;extracellular organelle;extracellular region part;extracellular vesicular exosome;intracellular membrane-bounded organelle;intracellular organelle;intracellular part;lysosome;lytic vacuole;membrane;membrane …	3D-structure;Alternativesplicing;Completeproteome;Diseasemutation;Exocytosis;Polymorphism;Proteintransport;Proteomicsidentification;Referenceproteome;Transport			15	15	15	31.8	31.8	31.8	64.705	0	56.205	2479800000	58	0.320583	0.367481	0.356938	A0A087WWS7;Q15833;Q15833-2;Q15833-3;M0R0M7;M0R1A1;M0QZ54;R4GMY7;M0R118;A0A087WUN8;M0R376;M0R0D4	A0A087WWS7;Q15833;Q15833-2;Q15833-3;M0R0M7	Syntaxin-binding protein 2	STXBP2
1.09615	1.1688	1.10835	1.07555	1.13375	1.08182	1.01574	1.03016	1.00363	1.00805	1.01954	1.38927	1.03616	1.04775	1.00197	1.04981	0.775177	0.984824	1.0212	1.12485	0.807813	0.915592	1.21127	0.99987	establishment of localization;establishment of protein localization;establishment of protein localization to organelle;macromolecule metabolic process;metabolic process;primary metabolic process;protein maturation;protein metabolic process	binding;enzyme binding;protein binding	cell part;integral to membrane;intrinsic to membrane;membrane part	Completeproteome;Glycoprotein;Membrane;Polymorphism;Proteomicsidentification;Referenceproteome;Transmembrane;Transmembranehelix			1	1	1	2.3	2.3	2.3	36.644	0.0092579	1.2569	193720000	4	0.372669	0.27194	0.798567	A0A087X235;A0A087WWT4;Q9H1Z9	A0A087X235;A0A087WWT4;Q9H1Z9	Tetraspanin;Tetraspanin-10	TSPAN10
0.972307	0.99991	0.939941	0.992566	1.09626	1.12008	1.00829	1.01887	0.967087	0.951313	0.997407	0.94252	1.01601	1.00549	1.01653	1.01199	1.0364	1.03399	1.01359	1.01707	0.977694	0.9977	0.917896	0.987532	biological regulation;regulation of apoptosis;regulation of biological process;regulation of cell death;regulation of cellular process;regulation of programmed cell death			Completeproteome;Proteomicsidentification;Referenceproteome			12	12	1	61.5	61.5	5.8	18.073	0	50.028	7410600000	87	0.306299	0.566591	0.965479	A0A087WWW9	A0A087WWW9		BCL10
0.974893	1.01098	1.09437	1.04653	1.09802	1.11591	0.980807	1.00645	1.00386	0.998245	1.00011	1.05973	1.02097	1.01303	0.990904	1.00906	0.992375	0.997752	1.03622	1.09911	0.910047	0.960635	1.03847	0.953843	cellular process;establishment of localization;transmembrane transport;transport	structural constituent of cytoskeleton;structural molecule activity	cell cortex;cell junction;cell part;cell-cell junction;chromosome;condensed chromosome;condensed nuclear chromosome;cytoplasm;cytoplasmic part;cytoskeleton;cytosol;intracellular non-membrane-bounded organelle;intracellular organelle;intracellular organelle part;intracellular part;membrane;non-membrane-bounded organelle;nuclear chromosome;nuclear part;nucleoplasm;organelle;organelle part;plasma me…	Acetylation;Actin-binding;Alternativesplicing;Calmodulin-binding;Cellmembrane;Completeproteome;Cytoplasm;Cytoskeleton;Membrane;Phosphoprotein;Proteomicsidentification;Referenceproteome;Ublconjugation			9	9	9	14.9	14.9	14.9	75.375	0	20.057	771580000	21	0.306958	0.42904	0.860756	A0A087WX08;Q9UEY8-2;Q9UEY8	A0A087WX08;Q9UEY8-2;Q9UEY8	Gamma-adducin	ADD3
0.948844	0.993436	1.11935	1.0581	1.10493	1.11994	1.01301	1.01608	0.990413	0.989511	1.00718	1.12454	1.0211	1.01345	0.985119	1.00961	0.938071	0.985567	1.00401	0.991913	0.994864	1.02042	1.09418	1.02591	cellular metabolic process;cellular process;electron transport chain;generation of precursor metabolites and energy;metabolic process;mitochondrial electron transport, NADH to ubiquinone;oxidation-reduction process;respiratory electron transport chain;response to chemical stimulus;response to drug;response to stimulus;small molecule metabolic process	adenyl nucleotide binding;adenyl ribonucleotide binding;ATP binding;binding;catalytic activity;kinase activity;NADH dehydrogenase (quinone) activity;NADH dehydrogenase (ubiquinone) activity;NADH dehydrogenase activity;nucleobase-containing compound kinase activity;nucleoside kinase activity;nucleotide binding;oxidoreductase activity;oxidoreductase activity, acting on NADH or NADPH;oxidoreductase …	cell part;cytoplasmic part;intracellular organelle lumen;intracellular organelle part;intracellular part;macromolecular complex;membrane;membrane part;membrane-enclosed lumen;mitochondrial inner membrane;mitochondrial matrix;mitochondrial membrane;mitochondrial membrane part;mitochondrial part;mitochondrial respiratory chain complex I;NADH dehydrogenase complex;organelle inner membrane;organelle …	Alternativesplicing;Completeproteome;Electrontransport;FAD;Flavoprotein;Mitochondrion;Polymorphism;Proteomicsidentification;Referenceproteome;Respiratorychain;Transitpeptide;Transport;Ubiquinone	Alzheimer's disease;Huntington's disease;Oxidative phosphorylation;Parkinson's disease		10	10	10	23.9	23.9	23.9	40.836	0	41.315	1378200000	53	0.19167	0.635494	0.723415	A0A087WXC5;E7ESZ7;O95299;O95299-2;H7C2W5;H7C1Y7;H7C2X4;Q8N1B9;C9J6X0	A0A087WXC5;E7ESZ7;O95299;O95299-2	NADH dehydrogenase [ubiquinone] 1 alpha subcomplex subunit 10, mitochondrial	NDUFA10
0.986483	1.02974	1.07254	1.04172	1.1833	1.1808	1.0137	1.04025	0.999433	0.988131	1.03548	1.10684	1.03324	1.02477	0.998766	1.03184	0.988621	1.0356	1.02235	1.05127	0.964668	0.99133	1.03971	1.00804	biological regulation;cation homeostasis;cation transport;cellular potassium ion transport;cellular process;chemical homeostasis;establishment of localization;homeostatic process;ion homeostasis;ion transmembrane transport;ion transport;metal ion transport;monovalent inorganic cation homeostasis;monovalent inorganic cation transport;potassium ion transmembrane transport;potassium ion transport;re…	active transmembrane transporter activity;antiporter activity;binding;cation transmembrane transporter activity;cation:cation antiporter activity;hydrogen ion transmembrane transporter activity;identical protein binding;inorganic cation transmembrane transporter activity;ion transmembrane transporter activity;metal ion transmembrane transporter activity;monovalent cation:hydrogen antiporter activ…	cell part;cytoplasmic part;endosomal part;endosome membrane;Golgi apparatus part;Golgi membrane;integral to membrane;intracellular organelle part;intracellular part;intrinsic to membrane;membrane;membrane part;organelle membrane;organelle part;recycling endosome membrane;trans-Golgi network	Antiport;Completeproteome;Endosome;Golgiapparatus;Iontransport;Membrane;Potassium;Potassiumtransport;Proteomicsidentification;Referenceproteome;Sodium;Sodiumtransport;Transmembrane;Transmembranehelix;Transport			3	3	3	3.4	3.4	3.4	80.215	0	19.512	260230000	12	0.0346613	0.365149	0.714081	A0A087WXD1;Q96T83	A0A087WXD1;Q96T83	Sodium/hydrogen exchanger;Sodium/hydrogen exchanger 7	SLC9A7
0.976621	1.00827	1.09542	1.04081	1.06422	1.07233	1.00446	1.0079	1.00194	0.994823	1.00511	1.10827	1.02427	1.01466	0.996119	1.01577	0.914121	0.974381	1.00127	0.979858	1.00882	1.02771	1.04847	1.02488	amine catabolic process;amine metabolic process;branched chain family amino acid catabolic process;branched chain family amino acid metabolic process;carboxylic acid catabolic process;carboxylic acid metabolic process;catabolic process;cellular amine metabolic process;cellular amino acid catabolic process;cellular amino acid metabolic process;cellular catabolic process;cellular ketone metabolic p…	3-hydroxyisobutyryl-CoA hydrolase activity;catalytic activity;CoA hydrolase activity;hydrolase activity;hydrolase activity, acting on ester bonds;thiolester hydrolase activity	cell part;cytoplasmic part;extracellular membrane-bounded organelle;extracellular organelle;extracellular region part;extracellular vesicular exosome;intracellular organelle lumen;intracellular organelle part;intracellular part;membrane-bounded organelle;membrane-bounded vesicle;membrane-enclosed lumen;mitochondrial matrix;mitochondrial part;organelle;organelle lumen;organelle part;vesicle	3D-structure;Acetylation;Alternativesplicing;Branched-chainaminoacidcatabolism;Completeproteome;Diseasemutation;Hydrolase;Mitochondrion;Polymorphism;Proteomicsidentification;Referenceproteome;Transitpeptide	beta-Alanine metabolism;Propanoate metabolism;Valine, leucine and isoleucine degradation		13	13	13	32.6	32.6	32.6	42.846	0	33.66	2271600000	47	0.513643	0.573871	0.523012	A0A087WXI1;Q6NVY1;B9A058;Q6NVY1-2;F8W8A6;H7C1A5;B8ZZZ0;H7C126;H7C400;H7BYI7	A0A087WXI1;Q6NVY1;B9A058;Q6NVY1-2	3-hydroxyisobutyryl-CoA hydrolase, mitochondrial	HIBCH
0.986198	1.01082	1.0214	1.01526	1.05039	1.05374	1.00847	1.02018	0.990757	0.983206	1.00994	1.01311	1.02102	1.01552	0.997581	1.01001	0.982571	1.01075	1.01314	0.998361	1.00256	1.01618	0.967965	1.01106	anatomical structure development;biosynthetic process;cardiac septum development;cellular biosynthetic process;cellular component organization;cellular component organization at cellular level;cellular component organization or biogenesis;cellular component organization or biogenesis at cellular level;cellular macromolecule biosynthetic process;cellular macromolecule metabolic process;cellular me…	protein binding transcription factor activity;transcription coactivator activity;transcription cofactor activity;transcription factor binding transcription factor activity	cell part;cis-Golgi network;cytoplasmic part;cytoplasmic vesicle part;cytoskeleton;Golgi apparatus;Golgi apparatus part;Golgi membrane;inner acrosomal membrane;intracellular membrane-bounded organelle;intracellular non-membrane-bounded organelle;intracellular organelle;intracellular organelle part;intracellular part;membrane;membrane part;membrane-bounded organelle;non-membrane-bounded organelle;…	Chromosomalrearrangement;Coiledcoil;Completeproteome;Cytoplasm;Cytoskeleton;Dwarfism;Golgiapparatus;Membrane;Phosphoprotein;Polymorphism;Proteomicsidentification;Referenceproteome			66	66	66	34	34	34	227.42	0	250.57	9186400000	220	0.755803	0.30982	0.591026	A0A087WXK9;Q15643;H0YJ97;H0YJI2;G3V4R7	A0A087WXK9;Q15643;H0YJ97	Thyroid receptor-interacting protein 11	TRIP11
0.959884	0.983327	1.05012	0.997804	1.06576	1.05564	1.00631	1.01018	0.996025	0.994816	1.01468	1.0577	1.05095	1.03054	1.00208	1.02323	0.937793	0.989444	1.0294	0.998132	1.02255	1.03661	0.987737	0.975714	cellular process;establishment of localization;establishment of localization in cell;establishment of protein localization;intracellular protein transport;intracellular transport;protein transport;transport;vesicle-mediated transport	binding;cation binding;ion binding;metal ion binding;nucleotide binding;protein binding;SNARE binding;syntaxin binding;transition metal ion binding;zinc ion binding	actin filament;cell part;cytoplasmic membrane-bounded vesicle;cytoplasmic part;cytoplasmic vesicle;cytoskeletal part;early endosome;endocytic vesicle;endosomal part;endosome;endosome membrane;HOPS complex;intracellular membrane-bounded organelle;intracellular organelle;intracellular organelle part;intracellular part;late endosome;late endosome membrane;lysosomal membrane;lysosome;lytic vacuole;ma…	Acetylation;Coiledcoil;Completeproteome;Cytoplasmicvesicle;Endosome;Lysosome;Membrane;Metal-binding;Nucleotide-binding;Polymorphism;Proteintransport;Proteomicsidentification;Referenceproteome;Repeat;Transport;Zinc;Zinc-finger			9	9	9	10.8	10.8	10.8	107.37	0	21.353	829360000	30	0.902595	0.690094	0.496634	B7Z879;A0A087WXL6;Q9H270;A0A087X2J4	B7Z879;A0A087WXL6;Q9H270	Vacuolar protein sorting-associated protein 11 homolog	VPS11
0.958124	0.981766	1.02685	1.00209	1.04362	1.06744	1.00212	1.01263	0.999841	0.982162	1.02595	1.01412	1.038	1.02455	1.00093	1.01477	0.992961	1.00476	0.999879	1.00175	1.00474	1.03721	0.959425	0.977259	anatomical structure morphogenesis;biological regulation;biosynthetic process;cell differentiation;cellular biosynthetic process;cellular developmental process;cellular macromolecule biosynthetic process;cellular macromolecule metabolic process;cellular metabolic process;cellular nitrogen compound metabolic process;cellular process;developmental process;macromolecule biosynthetic process;macromol…	binding;cation binding;core promoter proximal region DNA binding;core promoter proximal region sequence-specific DNA binding;DNA binding;ion binding;magnesium ion binding;metal ion binding;nucleic acid binding;nucleic acid binding transcription factor activity;regulatory region DNA binding;regulatory region nucleic acid binding;RNA polymerase II core promoter proximal region sequence-specific DNA…	cell part;intracellular membrane-bounded organelle;intracellular organelle;intracellular organelle part;intracellular part;membrane-bounded organelle;nuclear part;nucleoplasm;nucleus;organelle;organelle part	3D-structure;Acetylation;Alternativesplicing;Completeproteome;DNA-binding;Magnesium;Metal-binding;Nucleus;Phosphoprotein;Proteomicsidentification;Referenceproteome;Transcription;Transcriptionregulation			5	5	5	11.1	11.1	11.1	64.317	0	17.167	345090000	13	0.657618	0.458687	0.718006	A0A087WXM0;Q01167-2;Q01167;E9PPI7;I3L4U8;E9PM37	A0A087WXM0;Q01167-2;Q01167	Forkhead box protein K2	FOXK2
0.970408	0.989224	1.11504	1.04509	1.07832	1.08051	1.02312	1.00709	0.996479	0.979155	1.03986	1.12086	1.03008	1.02089	0.994748	1.00389	0.926785	0.988309	0.991654	0.991406	0.9828	1.00341	1.05224	1.01182	biosynthetic process;catabolic process;cellular biosynthetic process;cellular catabolic process;cellular component disassembly;cellular component disassembly at cellular level;cellular component organization;cellular component organization at cellular level;cellular component organization or biogenesis;cellular component organization or biogenesis at cellular level;cellular macromolecular complex…	structural constituent of ribosome;structural molecule activity	cell part;cytoplasmic part;cytosol;cytosolic large ribosomal subunit;intracellular membrane-bounded organelle;intracellular organelle;intracellular organelle part;intracellular part;large ribosomal subunit;macromolecular complex;membrane-bounded organelle;nucleus;organelle;organelle part;ribonucleoprotein complex	3D-structure;Alternativesplicing;Completeproteome;Directproteinsequencing;Phosphoprotein;Proteomicsidentification;Referenceproteome;Ribonucleoprotein;Ribosomalprotein	Ribosome		11	11	11	63.3	63.3	63.3	19.586	0	40.569	34442000000	181	0.3267	0.840976	0.555503	A0A087WXM6;J3QQT2;J3KRX5;A0A0A6YYL6;P18621;P18621-3;J3KRB3;A0A087WWH0;J3QS96;J3QLC8;A0A087WY81;A0A0A0MRF8;P18621-2;J3KSJ0	A0A087WXM6;J3QQT2;J3KRX5;A0A0A6YYL6;P18621;P18621-3;J3KRB3;A0A087WWH0;J3QS96;J3QLC8;A0A087WY81;A0A0A0MRF8;P18621-2	60S ribosomal protein L17	RPL17;RPL17-C18orf32
0.938838	0.965284	0.936365	0.98389	1.08387	1.0993	0.999748	1.01674	0.985038	0.96327	1.00442	0.887916	1.01984	1.01286	1.01315	1.01514	1.06722	1.02631	1.00217	0.965376	1.02967	1.0454	0.879639	0.990941	biological adhesion;biological regulation;cell adhesion;cell-matrix adhesion;cell-substrate adhesion;cellular process;cellular response to stimulus;regulation of biological process;regulation of cellular process;response to stimulus;signal transduction	binding;extracellular matrix binding;laminin binding;laminin receptor activity;molecular transducer activity;protein binding;protein C-terminus binding;receptor activity;signal transducer activity;signaling receptor activity;transmembrane signaling receptor activity	cell part;external side of plasma membrane;extracellular membrane-bounded organelle;extracellular organelle;extracellular region part;extracellular vesicular exosome;integral to membrane;integral to plasma membrane;intrinsic to membrane;intrinsic to plasma membrane;membrane;membrane part;membrane-bounded organelle;membrane-bounded vesicle;organelle;plasma membrane;plasma membrane part;vesicle	3D-structure;Bloodgroupantigen;Celladhesion;Completeproteome;Directproteinsequencing;Disulfidebond;Glycoprotein;Immunoglobulindomain;Membrane;Phosphoprotein;Polymorphism;Proteomicsidentification;Receptor;Referenceproteome;Repeat;Signal;Transmembrane;Transmembranehelix			10	10	10	19.6	19.6	19.6	63.693	0	134.34	3230800000	39	0.868259	0.949235	0.969103	A0A087WXM8;P50895;K7ENU8	A0A087WXM8;P50895	Basal cell adhesion molecule	BCAM
0.914524	0.940508	1.10545	1.03545	1.10244	1.10868	0.994307	0.98936	1.01623	1	0.987996	1.13857	1.02474	1.01768	1.00502	1.01649	0.891547	0.97222	1.01647	0.985734	0.998728	1.01513	1.07112	1.04908	acid secretion;bile acid secretion;biological regulation;establishment of localization;positive regulation of biological process;positive regulation of cell communication;positive regulation of cellular process;positive regulation of peroxisome proliferator activated receptor signaling pathway;positive regulation of response to stimulus;positive regulation of signal transduction;positive regulati…	binding;lipid binding	cell junction;cell part;cell projection;cell-cell junction;cytoplasmic part;cytosol;intercellular canaliculus;intracellular part;membrane;microvillus	Acetylation;Cellprojection;Completeproteome;Cytoplasm;Lipid-binding;Lipidtransport;Membrane;Phosphoprotein;Proteomicsidentification;Referenceproteome;Transport			5	5	5	22.6	22.6	22.6	29.043	0	14.878	844400000	20	0.227063	0.715966	0.457953	F5H1Z6;F5H8H3;A0A087WXR2;Q9Y365;F5GY11;F5H0V7;H0YH17;H0YFF3;F5H8G1;F5GWK5;F5H5A8;H0YGN8;F5H3G8;H0YGA9;F5GY07	F5H1Z6;F5H8H3;A0A087WXR2;Q9Y365;F5GY11;F5H0V7;H0YH17;H0YFF3;F5H8G1	PCTP-like protein	STARD10
0.979274	1.01327	1.0513	1.01435	1.07772	1.08634	1.00529	1.00807	1.00512	1.00239	1.01313	1.12865	1.02315	1.02002	0.992378	1.01452	0.97835	1.00012	0.992268	1.00733	0.973242	0.991512	1.02482	0.997553	biological regulation;catabolic process;cellular catabolic process;cellular macromolecule catabolic process;cellular macromolecule metabolic process;cellular metabolic process;cellular nitrogen compound metabolic process;cellular process;chordate embryonic development;developmental process;embryo development;embryo development ending in birth or egg hatching;in utero embryonic development;macromo…	catalytic activity;endonuclease activity;endonuclease activity, active with either ribo- or deoxyribonucleic acids and producing 5'-phosphomonoesters;endoribonuclease activity;endoribonuclease activity, producing 5'-phosphomonoesters;hydrolase activity;hydrolase activity, acting on ester bonds;nuclease activity;ribonuclease activity;ribonuclease H activity	cell part;intracellular membrane-bounded organelle;intracellular organelle;intracellular organelle part;intracellular part;macromolecular complex;membrane-bounded organelle;nuclear part;nucleoplasm;nucleus;organelle;organelle part;protein complex;ribonuclease H2 complex	3D-structure;Acetylation;Aicardi-Goutieressyndrome;Alternativesplicing;Completeproteome;Diseasemutation;Nucleus;Proteomicsidentification;Referenceproteome	DNA replication		6	6	6	18.7	18.7	18.7	37.36	0	13.405	731930000	17	0.0621617	0.250487	0.368953	A0A087WXR7;Q5TBB1;Q5TBB1-2;A0A087WZJ6	A0A087WXR7;Q5TBB1;Q5TBB1-2;A0A087WZJ6	Ribonuclease H2 subunit B	RNASEH2B
1.03188	1.07279	1.08056	1.03796	1.10422	1.0974	1.00143	1.01616	1.00651	0.999379	0.993097	1.06295	1.01547	1.01316	0.982926	1.00239	0.998915	1.00383	1.02542	1.07345	0.929342	0.951574	1.09884	0.999589	anion transport;biological regulation;cellular localization;cellular macromolecule localization;cellular macromolecule metabolic process;cellular metabolic process;cellular process;cellular protein localization;cellular protein metabolic process;cellular response to chemical stimulus;cellular response to organic substance;cellular response to stimulus;cellular response to stress;cellular response…	adenyl nucleotide binding;adenyl ribonucleotide binding;anion transmembrane transporter activity;arsenite transmembrane transporter activity;ATP binding;ATPase activity;binding;catalytic activity;cation binding;hydrolase activity;hydrolase activity, acting on acid anhydrides;hydrolase activity, acting on acid anhydrides, in phosphorus-containing anhydrides;inorganic anion transmembrane transporte…	cell part;cytoplasm;cytoplasmic part;endoplasmic reticulum;endoplasmic reticulum membrane;endoplasmic reticulum part;extracellular membrane-bounded organelle;extracellular organelle;extracellular region part;extracellular vesicular exosome;intracellular membrane-bounded organelle;intracellular non-membrane-bounded organelle;intracellular organelle;intracellular organelle part;intracellular part;m…	Acetylation;ATP-binding;Completeproteome;Cytoplasm;Endoplasmicreticulum;Hydrolase;Metal-binding;Nucleotide-binding;Nucleus;Polymorphism;Proteomicsidentification;Referenceproteome;Transport;Zinc			8	8	8	28.4	28.4	28.4	37.119	0	27.979	2371300000	66	0.106404	0.68977	0.822668	A0A087WXS7;O43681;K7ERW9	A0A087WXS7;O43681;K7ERW9	ATPase ASNA1	ASNA1
0.980288	0.979693	1.26362	1.06033	1.03506	1.0505	1.01302	0.955767	1.02697	1.00368	1.03363	0.949868	1.15298	1.10135	1.01631	1.04946	0.920452	0.951355	1.01035	0.913955	1.04708	1.0745	0.902823	0.973956	amine metabolic process;anatomical structure development;biological regulation;biosynthetic process;blood coagulation;carbohydrate homeostasis;carboxylic acid metabolic process;cellular amine metabolic process;cellular amino acid metabolic process;cellular biosynthetic process;cellular ketone metabolic process;cellular macromolecule metabolic process;cellular metabolic process;cellular nitrogen c…	activating transcription factor binding;binding;carboxylic acid binding;cation binding;core promoter binding;core promoter sequence-specific DNA binding;DNA binding;fatty acid binding;identical protein binding;ion binding;ligand-dependent nuclear receptor activity;lipid binding;metal ion binding;molecular transducer activity;monocarboxylic acid binding;nucleic acid binding;nucleic acid binding tr…	cell part;cytoplasm;intracellular membrane-bounded organelle;intracellular organelle;intracellular organelle part;intracellular part;membrane-bounded organelle;nuclear part;nucleoplasm;nucleus;organelle;organelle part	3D-structure;Acetylation;Alternativepromoterusage;Alternativesplicing;Completeproteome;Diabetesmellitus;Diseasemutation;DNA-binding;Isopeptidebond;Metal-binding;Nucleus;Phosphoprotein;Polymorphism;Proteomicsidentification;Receptor;Referenceproteome;Transcription;Transcriptionregulation;Ublconjugation;Zinc;Zinc-finger	Maturity onset diabetes of the young		2	2	2	4.2	4.2	4.2	49.99	0.0001616	3.1526	51764000	7	0.107207	0.447396	0.715333	A0A087WXV4;P41235-7;P41235-3;P41235-6;P41235-5;P41235-2;P41235;P41235-4;Q14541;Q14541-2	A0A087WXV4;P41235-7;P41235-3;P41235-6;P41235-5;P41235-2;P41235;P41235-4;Q14541;Q14541-2	Hepatocyte nuclear factor 4-alpha;Hepatocyte nuclear factor 4-gamma	HNF4A;HNF4G
0.996343	1.02669	0.991754	1.00814	1.05067	1.11234	1.00978	1.0036	0.991952	0.96737	1.01768	0.989572	1.05134	1.0346	1.01363	1.02546	1.0451	1.06075	1.01345	1.05359	0.975302	0.987028	0.959343	1.03699	anatomical structure development;anatomical structure morphogenesis;axon guidance;biological adhesion;biological regulation;biosynthetic process;blood vessel development;cell adhesion;cell migration;cell motility;cellular component disassembly;cellular component disassembly at cellular level;cellular component movement;cellular component organization;cellular component organization at cellular le…	binding;carbohydrate binding;cation binding;extracellular matrix structural constituent;glycoprotein binding;glycosaminoglycan binding;growth factor binding;heparin binding;integrin binding;ion binding;metal ion binding;pattern binding;platelet-derived growth factor binding;polysaccharide binding;protein binding;protein complex binding;proteoglycan binding;receptor binding;structural molecule act…	basement membrane;cell part;collagen;collagen type V;cytoplasmic part;endoplasmic reticulum lumen;endoplasmic reticulum part;extracellular matrix;extracellular matrix part;extracellular membrane-bounded organelle;extracellular organelle;extracellular region;extracellular region part;extracellular vesicular exosome;fibrillar collagen;intracellular organelle lumen;intracellular organelle part;intra…	3D-structure;Calcium;Collagen;Completeproteome;Directproteinsequencing;Diseasemutation;Disulfidebond;Ehlers-Danlossyndrome;Extracellularmatrix;Heparin-binding;Hydroxylation;Metal-binding;Polymorphism;Proteomicsidentification;Referenceproteome;Repeat;Secreted;Signal;Sulfation	Amoebiasis;ECM-receptor interaction;Focal adhesion;Protein digestion and absorption		5	5	4	2.3	2.3	1.8	183.65	0	13.023	268960000	14	0.0870911	0.297731	0.628707	A0A087WXW9;P20908;H7BY82	A0A087WXW9;P20908	Collagen alpha-1(V) chain	COL5A1
0.969275	1.00082	1.07527	1.03839	1.08653	1.1093	1.01124	1.02198	0.998076	0.987458	1.02372	1.07889	1.02046	1.01978	0.998547	1.00932	0.97773	0.989868	0.991311	0.974148	0.990401	1.0054	1.06556	1.0154	biological regulation;cellular macromolecule metabolic process;cellular metabolic process;cellular nitrogen compound metabolic process;cellular process;humoral immune response;immune response;immune system process;macromolecule metabolic process;metabolic process;mRNA metabolic process;nitrogen compound metabolic process;nucleic acid metabolic process;nucleobase-containing compound metabolic proc…		cell part;cytoplasmic mRNA processing body;cytoplasmic part;intracellular non-membrane-bounded organelle;intracellular organelle;intracellular part;macromolecular complex;non-membrane-bounded organelle;organelle;ribonucleoprotein complex;RNA granule	3D-structure;Acetylation;Alternativesplicing;Completeproteome;Cytoplasm;Directproteinsequencing;Phosphoprotein;Polymorphism;Proteomicsidentification;Referenceproteome;RNA-binding			15	12	11	26.2	21.8	21.8	61.163	0	56.993	3189300000	36	0.0748157	0.798452	0.787354	A0A087WXZ3;Q9Y5A9;Q9Y5A9-2;S4R3V3;S4R3J8	A0A087WXZ3;Q9Y5A9;Q9Y5A9-2	YTH domain-containing family protein 2	YTHDF2
0.960508	0.997178	0.994355	1.02321	1.1006	1.07943	1.02679	1.02387	0.97879	0.951948	1.02455	0.896068	1.04771	1.02875	1.01057	1.01186	1.02537	1.013	1.04019	1.03131	1.00832	1.04533	0.807468	0.938391	cellular macromolecule metabolic process;cellular metabolic process;cellular nitrogen compound metabolic process;cellular process;macromolecule metabolic process;metabolic process;mRNA metabolic process;mRNA processing;nitrogen compound metabolic process;nucleic acid metabolic process;nucleobase-containing compound metabolic process;primary metabolic process;RNA metabolic process;RNA processing;R…	binding;cation binding;ion binding;metal ion binding;nucleic acid binding;transition metal ion binding;zinc ion binding		Completeproteome;Metal-binding;mRNAprocessing;mRNAsplicing;Phosphoprotein;Proteomicsidentification;Referenceproteome;Zinc;Zinc-finger			4	4	4	29.6	29.6	29.6	11.405	0.0039683	1.6371	1045000000	11	0.733042	0.800633	0.990736	A0A087WXZ8;Q8N9Q2	A0A087WXZ8;Q8N9Q2	Protein SREK1IP1	SREK1IP1
1.00406	1.02405	1.08545	1.03774	1.13108	1.13028	0.995348	1.01916	0.997009	0.991078	1.00325	1.06085	1.01162	1.00439	0.990332	1.01523	0.938587	0.997806	1.02487	1.01886	0.98058	1.0004	1.01354	0.979689	cellular component organization;cellular component organization or biogenesis;cellular process;endosome transport;establishment of localization;establishment of localization in cell;establishment of protein localization;intracellular transport;membrane organization;multivesicular body sorting pathway;non-lytic viral release;non-lytic virus budding;protein transport;release of virus from host;repr…	binding;protein binding;protein C-terminus binding	cell part;cytoplasmic part;cytosol;endosomal part;endosome membrane;extracellular membrane-bounded organelle;extracellular organelle;extracellular region part;extracellular vesicular exosome;intracellular organelle part;intracellular part;membrane;membrane-bounded organelle;membrane-bounded vesicle;organelle;organelle membrane;organelle part;vesicle	3D-structure;Acetylation;Alternativesplicing;Completeproteome;Cytoplasm;Directproteinsequencing;Endosome;Membrane;Polymorphism;Proteintransport;Proteomicsidentification;Referenceproteome;Transport	Endocytosis		6	6	6	27.1	27.1	27.1	31.102	0	37.436	3044500000	62	0.463672	0.526062	0.652184	A0A087WY55;Q9NP79;Q5TGM0;Q9NP79-2	A0A087WY55;Q9NP79	Vacuolar protein sorting-associated protein VTA1 homolog	VTA1
1.01136	1.036	1.08359	1.03796	1.08199	1.09577	1.00744	1.01964	1.00954	0.998039	1.00869	1.1272	1.01648	1.0166	0.987842	1.01182	0.953485	0.991273	1.0045	1.02881	0.950148	0.970571	1.04627	1.01724	antigen processing and presentation;antigen processing and presentation of exogenous antigen;antigen processing and presentation of exogenous peptide antigen;antigen processing and presentation of exogenous peptide antigen via MHC class II;antigen processing and presentation of peptide antigen;antigen processing and presentation of peptide antigen via MHC class II;antigen processing and presentat…	binding;lipid binding;lipoprotein particle receptor binding;low-density lipoprotein particle receptor binding;peptide binding;protein binding;receptor binding;signal sequence binding;transporter activity	AP-2 adaptor complex;AP-type membrane coat adaptor complex;cell part;clathrin adaptor complex;clathrin coated vesicle membrane;clathrin-coated endocytic vesicle membrane;coated vesicle membrane;cytoplasmic part;cytoplasmic vesicle membrane;cytoplasmic vesicle part;cytosol;endocytic vesicle membrane;extracellular membrane-bounded organelle;extracellular organelle;extracellular region part;extracel…	3D-structure;Alternativesplicing;Cellmembrane;Coatedpit;Completeproteome;Endocytosis;Lipid-binding;Membrane;Phosphoprotein;Proteintransport;Proteomicsidentification;Referenceproteome;Transport	Endocrine and other factor-regulated calcium reabsorption;Endocytosis;Huntington's disease		15	15	10	35.9	35.9	26.5	49.526	0	35.496	2783000000	84	0.259312	0.359184	0.512528	A0A087WY71;Q96CW1-2;Q96CW1;E9PFW3;C9JJ47;C9JGT8;C9JJD3;C9JPV8;H7C4C3	A0A087WY71;Q96CW1-2;Q96CW1;E9PFW3;C9JJ47	AP-2 complex subunit mu	AP2M1
0.985669	1.01408	1.1584	1.08629	1.12681	1.19473	1.02696	1.03774	1.01478	1.00052	0.95246	1.1763	1.01844	1.02152	0.983352	1.017	0.903142	0.99009	1.01449	0.992987	0.981832	1.00427	1.13271	1.06107	activation of immune response;activation of innate immune response;apoptosis;biological regulation;biosynthetic process;BMP signaling pathway;catabolic process;cell death;cell surface receptor linked signaling pathway;cellular biosynthetic process;cellular catabolic process;cellular macromolecule biosynthetic process;cellular macromolecule catabolic process;cellular macromolecule metabolic proces…	acid-amino acid ligase activity;adenyl nucleotide binding;adenyl ribonucleotide binding;ATP binding;binding;catalytic activity;ligase activity;ligase activity, forming carbon-nitrogen bonds;nucleotide binding;purine nucleotide binding;purine ribonucleoside triphosphate binding;purine ribonucleotide binding;ribonucleotide binding;small conjugating protein ligase activity;ubiquitin-protein ligase a…	cell part;cytoplasmic part;cytosol;endosomal part;endosome membrane;extracellular membrane-bounded organelle;extracellular organelle;extracellular region part;extracellular vesicular exosome;intracellular organelle part;intracellular part;macromolecular complex;membrane;membrane-bounded organelle;membrane-bounded vesicle;nuclear part;nucleoplasm;organelle;organelle membrane;organelle part;plasma …	3D-structure;Alternativesplicing;Apoptosis;ATP-binding;Cellmembrane;Completeproteome;Directproteinsequencing;Disulfidebond;DNAdamage;DNArepair;Endosome;Ligase;Membrane;Nucleotide-binding;Phosphoprotein;Proteomicsidentification;Referenceproteome;Ublconjugationpathway	Protein processing in endoplasmic reticulum;Ubiquitin mediated proteolysis		2	2	2	16.1	16.1	16.1	13.637	0	4.0667	1564300000	18	0.387728	0.458148	0.410635	D6RAH7;H9KV45;A0A087WY85;P61077;P61077-3;D6RAW0;D6RFM0;A0A0A0MQU3;P62837-2;P62837;P61077-2	D6RAH7;H9KV45;A0A087WY85;P61077;P61077-3;D6RAW0;D6RFM0;A0A0A0MQU3;P62837-2;P62837;P61077-2	Ubiquitin-conjugating enzyme E2 D3;Ubiquitin-conjugating enzyme E2 D2	UBE2D3;UBE2D2
0.987015	1.02438	1.00984	0.972316	1.09149	1.06727	1.05196	1.04176	1.00608	0.989603	1.04871	1.01721	1.02385	1.03079	1.00502	1.0268	1.00763	1.00945	0.989792	0.977801	0.995326	1.01446	1.01639	0.995558	cell differentiation;cellular component organization;cellular component organization at cellular level;cellular component organization or biogenesis;cellular component organization or biogenesis at cellular level;cellular developmental process;cellular process;defense response;defense response to fungus;developmental process;endoplasmic reticulum organization;establishment of localization;establi…		cell part;cytoplasmic part;endoplasmic reticulum;endoplasmic reticulum membrane;endoplasmic reticulum part;integral to membrane;intracellular membrane-bounded organelle;intracellular organelle;intracellular organelle part;intracellular part;intrinsic to membrane;membrane;membrane part;membrane-bounded organelle;organelle;organelle membrane;organelle part	Completeproteome;Diseasemutation;Endoplasmicreticulum;Immunity;Membrane;Phosphoprotein;Proteintransport;Proteomicsidentification;Referenceproteome;Transmembrane;Transmembranehelix;Transport			4	4	4	14.9	14.9	14.9	20.791	0	27.117	878230000	18	0.087362	0.749853	0.862706	A0A087WY88;Q8N5M9	A0A087WY88;Q8N5M9	Protein jagunal homolog 1	JAGN1
0.911397	0.956694	1.30963	1.14674	1.23609	1.24669	0.998806	0.962152	0.993403	0.980016	0.950485	1.14222	1.0269	1.01704	0.978375	1.01714	0.868066	0.958412	1.00382	0.907785	1.09688	1.15355	1.08807	1.00414			cell part;cytoplasmic part;integral to membrane;intracellular organelle part;intracellular part;intrinsic to membrane;membrane;membrane part;mitochondrial inner membrane;mitochondrial membrane;mitochondrial part;organelle inner membrane;organelle membrane;organelle part	Completeproteome;Membrane;Mitochondrion;Mitochondrioninnermembrane;Phosphoprotein;Proteomicsidentification;Referenceproteome;Transitpeptide;Transmembrane;Transmembranehelix			4	4	4	13.1	13.1	13.1	29.205	0	29.301	435690000	9	0.146319	0.904203	0.632729	A0A087WYF7;Q6UXV4;A0A087WUX8	A0A087WYF7;Q6UXV4;A0A087WUX8	MICOS complex subunit MIC27	APOOL
0.951431	1.02442	1.43661	1.32682	1.09111	1.04984	1.00153	1.02532	1.01474	1.00457	1.03502	1.21353	1.01101	1.00223	0.987899	1.01558	0.946897	0.971683	1.04055	1.07822	0.928359	0.959889	1.19684	1.02722	anatomical structure development;autophagy;axon ensheathment;biological regulation;biosynthetic process;catabolic process;cell cycle;cell cycle phase;cell cycle process;cell division;cell surface receptor linked signaling pathway;cellular biosynthetic process;cellular catabolic process;cellular component organization;cellular component organization at cellular level;cellular component organizatio…	binding;catalytic activity;cation binding;chromatin binding;coenzyme binding;cofactor binding;deacetylase activity;enzyme binding;histone acetyltransferase binding;histone deacetylase activity;histone deacetylase binding;hydrolase activity;hydrolase activity, acting on carbon-nitrogen (but not peptide) bonds;hydrolase activity, acting on carbon-nitrogen (but not peptide) bonds, in linear amides;i…	axon part;cell junction;cell part;cell projection part;cell-cell junction;centriole;centrosome;chromatin;chromatin remodeling complex;chromatin silencing complex;chromosomal part;chromosome;cytoplasm;cytoplasmic part;cytoskeletal part;cytosol;growth cone;heterochromatin;intracellular membrane-bounded organelle;intracellular non-membrane-bounded organelle;intracellular organelle;intracellular orga…	3D-structure;Acetylation;Alternativesplicing;Autophagy;Cellcycle;Celldivision;Cellmembrane;Cellprojection;Chromosome;Completeproteome;Cytoplasm;Cytoskeleton;Differentiation;Hydrolase;Immunity;Innateimmunity;Meiosis;Membrane;Metal-binding;Microtubule;Mitosis;NAD;Neurodegeneration;Neurogenesis;Nucleus;Phosphoprotein;Proteomicsidentification;Referenceproteome;Transcription;Transcriptionregulation;Ub…			4	4	4	10.5	10.5	10.5	43.301	0	6.3943	85898000	9	0.588505	0.89567	0.943271	A0A087WYM3;Q8IXJ6-2;Q8IXJ6-3;Q8IXJ6;A0A0A0MRF5;E7EWX6;Q8IXJ6-4;F8WF57;F8WDM4;C9JR33;C9J3U7;F8WCF4;C9JZQ0;B5MCS1;Q8IXJ6-5	A0A087WYM3;Q8IXJ6-2;Q8IXJ6-3;Q8IXJ6;A0A0A0MRF5;E7EWX6;Q8IXJ6-4;F8WF57;F8WDM4;C9JR33;C9J3U7;F8WCF4;C9JZQ0;B5MCS1;Q8IXJ6-5	NAD-dependent protein deacetylase sirtuin-2	SIRT2
0.996789	1.02787	1.06763	1.01502	1.05782	1.05622	1.00856	1.0179	0.997914	0.990473	1.01949	1.13598	1.02604	1.02134	0.99259	1.011	0.957074	0.994453	1.00722	1.00886	0.985789	0.997115	1.04715	1.02356	cellular macromolecule metabolic process;cellular metabolic process;cellular nitrogen compound metabolic process;cellular process;macromolecule metabolic process;metabolic process;nitrogen compound metabolic process;nucleic acid metabolic process;nucleobase-containing compound metabolic process;primary metabolic process;RNA metabolic process;RNA processing	adenyl nucleotide binding;adenyl ribonucleotide binding;ATP binding;ATPase activity;ATPase activity, coupled;ATP-dependent helicase activity;ATP-dependent RNA helicase activity;binding;catalytic activity;helicase activity;hydrolase activity;hydrolase activity, acting on acid anhydrides;hydrolase activity, acting on acid anhydrides, in phosphorus-containing anhydrides;nucleic acid binding;nucleosi…	cell part;cytoplasmic part;eukaryotic 43S preinitiation complex;intracellular membrane-bounded organelle;intracellular organelle;intracellular part;macromolecular complex;membrane-bounded organelle;mitochondrion;nucleus;organelle;ribonucleoprotein complex;translation preinitiation complex	ATP-binding;Coiledcoil;Completeproteome;Cytoplasm;Helicase;Hydrolase;Initiationfactor;Nucleotide-binding;Phosphoprotein;Polymorphism;Proteinbiosynthesis;Proteomicsidentification;Referenceproteome			26	26	26	19.4	19.4	19.4	155.29	0	63.928	2923800000	56	0.243503	0.4523	0.419911	A0A087WYN9;Q7Z478;H0Y8L1	A0A087WYN9;Q7Z478	ATP-dependent RNA helicase DHX29	DHX29
0.983248	1.01487	1.08415	1.02607	1.08657	1.0905	1.01278	1.01568	1.00504	0.991206	1.01787	1.10261	1.02439	1.01241	0.990066	1.0092	0.910806	0.982269	0.997434	1.01287	0.962707	0.988583	1.13161	1.0376	biosynthetic process;cellular biosynthetic process;cellular macromolecule biosynthetic process;cellular macromolecule metabolic process;cellular metabolic process;cellular process;cellular protein metabolic process;cotranslational protein targeting to membrane;establishment of localization;establishment of localization in cell;establishment of protein localization;establishment of protein localiz…	7S RNA binding;binding;nucleic acid binding;RNA binding	cell part;cytoplasm;cytoplasmic part;cytosol;intracellular membrane-bounded organelle;intracellular non-membrane-bounded organelle;intracellular organelle;intracellular organelle part;intracellular part;macromolecular complex;membrane-bounded organelle;mitochondrion;non-membrane-bounded organelle;nuclear part;nucleolus;nucleoplasm;nucleus;organelle;organelle part;ribonucleoprotein complex;signal …	3D-structure;Alternativesplicing;Completeproteome;Cytoplasm;Directproteinsequencing;Polymorphism;Proteomicsidentification;Referenceproteome;Ribonucleoprotein;RNA-binding;Signalrecognitionparticle	Protein export		9	9	9	60	60	60	13.654	0	66.778	3866100000	32	0.303846	0.815819	0.866335	A0A087WYR0;P09132;A0A087WWU9;P09132-2;D6RBG4	A0A087WYR0;P09132;A0A087WWU9	Signal recognition particle 19 kDa protein	SRP19
0.962553	0.990791	1.06602	1.03084	1.04982	1.05185	1.00979	1.01216	1.0038	0.997891	1.01319	1.0507	1.02297	1.01491	0.997031	1.01359	1.01651	1.01284	1.00687	0.981001	1.00057	1.01894	0.959432	0.992603	biological regulation;cell cycle cytokinesis;cell cycle phase;cell cycle process;cellular component assembly;cellular component assembly at cellular level;cellular component organization;cellular component organization at cellular level;cellular component organization or biogenesis;cellular component organization or biogenesis at cellular level;cellular macromolecular complex assembly;cellular ma…	1-phosphatidylinositol binding;Arp2/3 complex binding;binding;enzyme binding;identical protein binding;lipid binding;phosphatidylinositol binding;phospholipid binding;protein binding;protein complex binding;protein dimerization activity;protein homodimerization activity;ubiquitin protein ligase binding	cell part;cell projection;clathrin-coated vesicle;coated vesicle;cytoplasm;cytoplasmic membrane-bounded vesicle;cytoplasmic part;cytoplasmic vesicle;cytoplasmic vesicle membrane;cytoplasmic vesicle part;endosome;extracellular membrane-bounded organelle;extracellular organelle;extracellular region part;extracellular vesicular exosome;extrinsic to internal side of plasma membrane;extrinsic to membr…	3D-structure;Acetylation;Cellcycle;Celldivision;Cellmembrane;Cellprojection;Completeproteome;Cytoplasm;Cytoplasmicvesicle;Endocytosis;Golgiapparatus;Lipid-binding;Membrane;Mitosis;Phosphoprotein;Proteintransport;Proteomicsidentification;Referenceproteome;SH3domain;Transport;Ublconjugation			11	11	11	23.7	23.7	23.7	66.476	0	207.37	2167200000	46	0.272148	0.539524	0.4772	A0A087WYU1;Q9Y5X1;A0A087WVE4;A0A087WZW2	A0A087WYU1;Q9Y5X1	Sorting nexin;Sorting nexin-9	SNX9
1.0109	1.05974	1.12865	1.07146	1.31051	1.36859	0.97649	1.018	0.994142	0.992245	0.974938	1.08663	1.0098	1.01718	0.978131	0.997811	0.969734	1.00226	1.02258	1.01908	0.968955	0.962187	1.14027	1.0175				Acetylation;Alternativesplicing;Completeproteome;Directproteinsequencing;Polymorphism;Proteomicsidentification;Referenceproteome			2	2	2	13	13	13	20.428	0	4.5145	143850000	11	0.0958384	0.752528	0.819778	A0A087WYU2;Q96S19-3;Q96S19-5;Q96S19;H3BS73;H3BRT2;H3BQ55;H3BNT3;H3BNB2;H3BMF3;Q96S19-2;Q96S19-6;Q96S19-4	A0A087WYU2;Q96S19-3;Q96S19-5;Q96S19;H3BS73;H3BRT2;H3BQ55;H3BNT3;H3BNB2;H3BMF3;Q96S19-2;Q96S19-6;Q96S19-4	UPF0585 protein C16orf13	C16orf13
0.983824	1.0636	1.11898	1.02823	1.18855	1.15307	0.988523	0.999388	1.03188	1.03882	0.938854	1.13439	1.02787	0.997124	0.967906	1.00143	0.963007	0.975492	1.00302	1.02582	0.948717	0.973882	1.12319	1.02304	anatomical structure development;cellular component organization;cellular component organization at cellular level;cellular component organization or biogenesis;cellular component organization or biogenesis at cellular level;cellular process;cellular response to heat;cellular response to stimulus;cellular response to stress;developmental process;establishment of localization;establishment of loca…	binding;heat shock protein binding;Hsp70 protein binding;protein binding;protein transporter activity;substrate-specific transporter activity;transporter activity	cell junction;cell part;cytoplasmic part;cytosol;extracellular membrane-bounded organelle;extracellular organelle;extracellular region part;extracellular vesicular exosome;intracellular;intracellular membrane-bounded organelle;intracellular organelle;intracellular organelle part;intracellular part;membrane-bounded organelle;membrane-bounded vesicle;nuclear part;nucleoplasm;nucleus;organelle;organ…	3D-structure;Completeproteome;Cytoplasm;Nucleus;Polymorphism;Proteintransport;Proteomicsidentification;Referenceproteome;Transport			1	1	1	7.6	7.6	7.6	14.399	0.0021154	2.015	72764000	8	0.259325	0.697082	0.851454	A0A087WYW7;Q53FT3	A0A087WYW7;Q53FT3	Protein Hikeshi	C11orf73
0.940758	0.984823	1.0724	1.02655	1.08616	1.09666	1.00726	1.01474	1.00066	0.983396	1.01827	1.03894	1.01889	1.013	0.993739	1.0068	0.956316	0.99283	1.00027	0.986094	0.991712	1.01246	1.01793	1.03213		binding;nucleic acid binding;nucleotide binding	cell part;cytoplasm;intracellular membrane-bounded organelle;intracellular organelle;intracellular part;membrane-bounded organelle;nucleus;organelle	3D-structure;Acetylation;Alternativesplicing;Completeproteome;Cytoplasm;Nucleus;Phosphoprotein;Proteomicsidentification;Referenceproteome;Repeat;RNA-binding			16	16	16	25.2	25.2	25.2	77.843	0	92.039	2345500000	70	0.244755	0.728413	0.73561	A0A087WZ13;E9PAU2;Q8IY67-2;Q8IY67;K7EKR9;Q8IY67-3;K7EQG2	A0A087WZ13;E9PAU2;Q8IY67-2;Q8IY67	Ribonucleoprotein PTB-binding 1	RAVER1
0.967217	1.00206	1.09795	1.0161	1.02497	1.06674	1.02364	1.01406	1.01841	1.00656	1.09379	1.10039	1.03086	1.02107	0.994352	1.00838	0.959444	0.988399	0.978596	0.961609	1.01576	1.03591	1.01452	1.02033	biosynthetic process;carbohydrate biosynthetic process;carbohydrate metabolic process;cellular carbohydrate metabolic process;cellular macromolecule metabolic process;cellular metabolic process;cellular process;cellular protein metabolic process;dolichol-linked oligosaccharide biosynthetic process;glycosylation;macromolecule glycosylation;macromolecule metabolic process;macromolecule modification…	catalytic activity;mannosyltransferase activity;transferase activity;transferase activity, transferring glycosyl groups;transferase activity, transferring hexosyl groups	cell part;cytoplasmic part;endoplasmic reticulum;endoplasmic reticulum membrane;endoplasmic reticulum part;integral to membrane;intracellular membrane-bounded organelle;intracellular organelle;intracellular organelle part;intracellular part;intrinsic to membrane;membrane;membrane part;membrane-bounded organelle;organelle;organelle membrane;organelle part	Alternativesplicing;Chromosomalrearrangement;Completeproteome;Congenitaldisorderofglycosylation;Diseasemutation;Endoplasmicreticulum;Glycoprotein;Glycosyltransferase;Membrane;Phosphoprotein;Polymorphism;Proteomicsidentification;Referenceproteome;Transferase;Transmembrane;Transmembranehelix	N-Glycan biosynthesis;Various types of N-glycan biosynthesis		5	5	5	7.3	7.3	7.3	95.921	0	24.295	504130000	16	0.241341	0.914916	0.584594	A0A087WZ62;Q9H6U8;Q9H6U8-3;A0A087WTZ3;A0A087WVC0;A0A087WZY8;A0A087WX16;H0YCW6;Q9H6U8-2;Q9H6U8-4	A0A087WZ62;Q9H6U8;Q9H6U8-3;A0A087WTZ3;A0A087WVC0;A0A087WZY8;A0A087WX16	Alpha-1,2-mannosyltransferase ALG9	ALG9
0.990555	1.01855	1.03426	1.0164	1.05373	1.08933	1.01045	1.02146	0.999849	0.994396	0.977059	1.02183	1.01763	1.01404	0.999502	1.02044	0.989836	1.01717	1.00732	1.02395	0.96386	0.977102	1.03192	1.02237	5S class rRNA transcription from RNA polymerase III type 1 promoter;biosynthetic process;cellular biosynthetic process;cellular macromolecule biosynthetic process;cellular macromolecule metabolic process;cellular metabolic process;cellular nitrogen compound metabolic process;cellular process;gene expression;macromolecule biosynthetic process;macromolecule metabolic process;metabolic process;nitro…		cell part;intracellular organelle part;intracellular part;macromolecular complex;nuclear part;nucleoplasm;nucleoplasm part;organelle part;protein complex;transcription factor complex;transcription factor TFIIIC complex	Alternativesplicing;Completeproteome;Directproteinsequencing;Nucleus;Phosphoprotein;Proteomicsidentification;Referenceproteome;Repeat;Transcription;WDrepeat			2	2	2	3.1	3.1	3.1	63.874	0	5.1251	312540000	10	0.198913	0.236425	0.604072	A0A087WZD8;Q8WUA4-2;Q8WUA4	A0A087WZD8;Q8WUA4-2;Q8WUA4	General transcription factor 3C polypeptide 2	GTF3C2
0.976256	1.01602	1.04453	0.979711	1.15052	1.13336	0.991113	1.01215	1.00671	0.967438	0.991232	0.966101	1.0268	1.03099	0.992156	1.01208	0.957385	1.00178	1.02406	1.05677	0.951467	0.988679	0.986653	0.968272	biological regulation;cell surface receptor linked signaling pathway;cellular component movement;cellular process;cellular response to stimulus;defense response;developmental process;enzyme linked receptor protein signaling pathway;fertilization;immune response;immune system process;innate immune response;multicellular organismal development;multicellular organismal process;multi-organism process…	adenyl nucleotide binding;adenyl ribonucleotide binding;ATP binding;binding;catalytic activity;enzyme binding;kinase activity;macrophage colony-stimulating factor receptor activity;molecular transducer activity;nucleotide binding;phosphotransferase activity, alcohol group as acceptor;protein binding;protein kinase activity;protein tyrosine kinase activity;purine nucleotide binding;purine ribonucl…	actin filament bundle;actomyosin;cell part;cell surface;cytoskeletal part;integral to membrane;integral to plasma membrane;intracellular organelle part;intracellular part;intrinsic to membrane;intrinsic to plasma membrane;membrane part;organelle part;plasma membrane part;stress fiber	3D-structure;Alternativesplicing;ATP-binding;Cleavageonpairofbasicresidues;Completeproteome;Disulfidebond;Glycoprotein;Immunity;Innateimmunity;Kinase;Membrane;Nucleotide-binding;Phosphoprotein;Polymorphism;Proteomicsidentification;Receptor;Referenceproteome;Repeat;Signal;Transferase;Transmembrane;Transmembranehelix;Tyrosine-proteinkinase;Ublconjugation			6	6	6	6.3	6.3	6.3	140.7	0	16.793	241380000	16	0.450149	0.761594	0.784345	A0A087WZG2;Q04912-2;Q04912;J3KQS7;Q04912-5;A0A087WZQ8;Q04912-3;Q04912-4;Q04912-6;H7C3Z8	A0A087WZG2;Q04912-2;Q04912;J3KQS7;Q04912-5;A0A087WZQ8;Q04912-3;Q04912-4;Q04912-6	Receptor protein-tyrosine kinase;Macrophage-stimulating protein receptor;Macrophage-stimulating protein receptor alpha chain;Macrophage-stimulating protein receptor beta chain	MST1R
0.957975	0.979887	0.936815	0.985756	1.0221	1.04396	1.00811	1.02361	0.981449	0.954281	1.00987	0.882383	1.02222	1.01461	1.01754	1.00838	1.11564	1.04456	1.01925	0.999198	1.0065	1.0218	0.880708	0.984828	biological regulation;cellular metabolic process;cellular process;energy derivation by oxidation of organic compounds;energy reserve metabolic process;generation of precursor metabolites and energy;metabolic process;oxidation-reduction process;regulation of biological process;regulation of cell communication;regulation of cellular localization;regulation of cellular process;regulation of hormone …	actin binding;actin filament binding;binding;calmodulin binding;cytoskeletal protein binding;protein binding	actin cytoskeleton;adherens junction;anchoring junction;cell cortex;cell junction;cell part;cell-substrate adherens junction;cell-substrate junction;centrosome;cytoplasmic part;cytoskeletal part;cytoskeleton;extracellular membrane-bounded organelle;extracellular organelle;extracellular region part;extracellular vesicular exosome;female germ cell nucleus;focal adhesion;germ cell nucleus;germinal v…	Actin-binding;Calmodulin-binding;Completeproteome;Cytoplasm;Cytoskeleton;Lipoprotein;Membrane;Myristate;Phosphoprotein;Polymorphism;Proteomicsidentification;Referenceproteome	Fc gamma R-mediated phagocytosis		16	16	15	55.2	55.2	52.1	31.595	0	323.31	129570000000	340	0.878018	0.935544	0.916428	A0A087WZH7;P29966	A0A087WZH7;P29966	Myristoylated alanine-rich C-kinase substrate	MARCKS
0.982622	1.01067	1.08784	1.03192	1.07493	1.07086	1.009	1.01384	0.998979	0.999871	1.03105	1.13951	1.02259	1.01579	0.99457	1.01165	0.969858	0.991453	1.01252	1.01448	0.976055	0.995785	1.04353	0.979115	biological regulation;biosynthetic process;cellular biosynthetic process;cellular component assembly;cellular component assembly at cellular level;cellular component organization;cellular component organization at cellular level;cellular component organization or biogenesis;cellular component organization or biogenesis at cellular level;cellular macromolecular complex assembly;cellular macromolec…	binding;nucleic acid binding;RNA binding;translation factor activity, nucleic acid binding;translation initiation factor activity	cell part;cytoplasmic part;cytosol;eukaryotic 43S preinitiation complex;eukaryotic 48S preinitiation complex;eukaryotic translation initiation factor 3 complex;eukaryotic translation initiation factor 3 complex, eIF3m;extracellular membrane-bounded organelle;extracellular organelle;extracellular region part;extracellular vesicular exosome;intracellular part;macromolecular complex;membrane;membran…	3D-structure;Completeproteome;Cytoplasm;Initiationfactor;Phosphoprotein;Proteinbiosynthesis;Proteomicsidentification;Referenceproteome	Measles;RNA transport		15	15	15	38.7	38.7	38.7	39.589	0	290.29	23130000000	181	0.175739	0.550847	0.576936	A0A087WZK9;B3KS98;O15372;E5RGU4;E5RJT0;E5RHC7;E5RH59;E5RFW7;E5RFH0;REV__Q2WGJ6	A0A087WZK9;B3KS98;O15372	Eukaryotic translation initiation factor 3 subunit H	EIF3H
0.966711	1.00683	0.96584	0.987941	1.12223	1.12526	0.984831	1.0028	0.988887	0.970711	0.975764	0.918326	1.02929	1.0012	1.00692	1.00321	1.01462	1.01118	1.02231	1.02823	1.00315	1.02929	0.905185	0.97762	catabolic process;cellular catabolic process;cellular macromolecule catabolic process;cellular macromolecule metabolic process;cellular metabolic process;cellular nitrogen compound metabolic process;cellular process;macromolecule catabolic process;macromolecule metabolic process;metabolic process;nitrogen compound metabolic process;nucleic acid metabolic process;nucleobase-containing compound met…	binding;catalytic activity;endonuclease activity;endonuclease activity, active with either ribo- or deoxyribonucleic acids and producing 3'-phosphomonoesters;endoribonuclease activity;endoribonuclease activity, producing 3'-phosphomonoesters;hydrolase activity;hydrolase activity, acting on ester bonds;nuclease activity;nucleic acid binding;ribonuclease activity;ribonuclease T2 activity;RNA binding	cell part;cytoplasmic part;endoplasmic reticulum lumen;endoplasmic reticulum part;extracellular membrane-bounded organelle;extracellular organelle;extracellular region;extracellular region part;extracellular space;extracellular vesicular exosome;intracellular membrane-bounded organelle;intracellular organelle;intracellular organelle lumen;intracellular organelle part;intracellular part;lysosomal …	3D-structure;Alternativesplicing;Completeproteome;Diseasemutation;Disulfidebond;Endonuclease;Endoplasmicreticulum;Glycoprotein;Hydrolase;Lysosome;Nuclease;Polymorphism;Proteomicsidentification;Referenceproteome;Secreted;Signal			6	6	6	24.5	24.5	24.5	29.114	0	11.478	1871100000	43	0.851041	0.704726	0.99128	D6RHI9;A0A087WZM2;O00584;D6REQ6;H0YAE9;A0A087WWI1;O00584-2;J3QQ64	D6RHI9;A0A087WZM2;O00584;D6REQ6;H0YAE9	Ribonuclease T2	RNASET2
0.988729	1.03354	1.06202	1.02813	1.09432	1.09287	1.00964	1.02301	0.99781	0.996905	1.01246	1.10136	1.0108	1.01386	0.995242	1.01418	0.947105	0.978641	0.989195	0.997453	0.971477	0.9945	1.04951	1.00312	2-oxoglutarate metabolic process;acetyl-CoA catabolic process;acetyl-CoA metabolic process;carboxylic acid metabolic process;catabolic process;cellular catabolic process;cellular ketone metabolic process;cellular metabolic process;cellular nitrogen compound metabolic process;cellular process;coenzyme catabolic process;coenzyme metabolic process;cofactor catabolic process;cofactor metabolic proces…	binding;catalytic activity;cation binding;coenzyme binding;cofactor binding;electron carrier activity;ion binding;isocitrate dehydrogenase (NAD+) activity;isocitrate dehydrogenase activity;magnesium ion binding;metal ion binding;NAD binding;nucleotide binding;oxidoreductase activity;oxidoreductase activity, acting on CH-OH group of donors;oxidoreductase activity, acting on the CH-OH group of dono…	cell part;cytoplasmic part;intracellular membrane-bounded organelle;intracellular organelle;intracellular organelle lumen;intracellular organelle part;intracellular part;membrane-bounded organelle;membrane-enclosed lumen;mitochondrial matrix;mitochondrial part;mitochondrion;nucleus;organelle;organelle lumen;organelle part	Acetylation;Alternativesplicing;Completeproteome;Diseasemutation;Magnesium;Manganese;Metal-binding;Mitochondrion;NAD;Oxidoreductase;Polymorphism;Proteomicsidentification;Referenceproteome;Retinitispigmentosa;Transitpeptide;Tricarboxylicacidcycle	Citrate cycle (TCA cycle)		8	8	8	17.6	17.6	17.6	42.41	0	23.563	1345400000	36	0.250471	0.407016	0.768905	A0A087WZN1;O43837;O43837-3;A0A087X2E5;O43837-2	A0A087WZN1;O43837;O43837-3;A0A087X2E5;O43837-2	Isocitrate dehydrogenase [NAD] subunit, mitochondrial;Isocitrate dehydrogenase [NAD] subunit beta, mitochondrial	IDH3B
0.992029	1.02865	1.08654	1.04404	1.07788	1.08631	0.976613	1.0279	1.00612	1.00304	1.04621	1.20165	1.02906	1.02734	1.01115	1.02221	0.939728	0.999433	0.999776	1.00846	0.973691	0.98832	1.09616	1.04076	amine biosynthetic process;amine metabolic process;biosynthetic process;carboxylic acid biosynthetic process;carboxylic acid metabolic process;cellular amine metabolic process;cellular amino acid biosynthetic process;cellular amino acid metabolic process;cellular biosynthetic process;cellular ketone metabolic process;cellular metabolic process;cellular nitrogen compound biosynthetic process;cellu…	catalytic activity;oxidoreductase activity;oxidoreductase activity, acting on the CH-NH group of donors;oxidoreductase activity, acting on the CH-NH group of donors, NAD or NADP as acceptor;pyrroline-5-carboxylate reductase activity	cell part;cytoplasm;intracellular part	Acetylation;Amino-acidbiosynthesis;Completeproteome;Cytoplasm;Directproteinsequencing;NADP;Oxidoreductase;Phosphoprotein;Prolinebiosynthesis;Proteomicsidentification;Referenceproteome	Arginine and proline metabolism		8	7	7	25.1	21	21	33.637	0	13.625	1457400000	33	0.132668	0.363629	0.535475	A0A087WZR9;Q96C36;A0A087WTV6;J3KR12;A0A087WX69;A0A087WZF0	A0A087WZR9;Q96C36;A0A087WTV6	Pyrroline-5-carboxylate reductase;Pyrroline-5-carboxylate reductase 2	PYCR2
0.935269	0.996055	1.18895	1.07597	1.17966	1.19736	1.00208	0.986528	1.00321	0.987809	1.00907	1.1617	1.02687	1.02049	0.992009	1.00079	0.906594	0.980904	0.997982	0.995324	0.984784	0.992641	1.08479	1.03446	cellular metabolic process;cellular process;metabolic process;methylation;one-carbon metabolic process;small molecule metabolic process	catalytic activity;methyltransferase activity;S-adenosylmethionine-dependent methyltransferase activity;transferase activity;transferase activity, transferring one-carbon groups	cell part;cytoplasm;intracellular part	Completeproteome;Methyltransferase;Proteomicsidentification;Referenceproteome;Signal;Transferase			6	6	6	23.2	23.2	23.2	31.288	0	12.044	361310000	13	0.183131	0.765157	0.512246	A0A087WZT2;Q6UX53	A0A087WZT2;Q6UX53	Methyltransferase-like protein 7B	METTL7B
0.98255	1.0155	1.05938	1.01323	1.04608	1.04242	1.01379	1.02213	0.996672	1.00273	0.977619	1.06896	1.01628	1.01439	0.982144	1.00617	0.983252	0.991126	1.00372	1.02256	0.972509	1.00126	1.04001	1.00199	alcohol metabolic process;carbohydrate metabolic process;cellular carbohydrate metabolic process;cellular metabolic process;cellular process;inositol metabolic process;inositol phosphate metabolic process;metabolic process;organophosphate metabolic process;polyol metabolic process;primary metabolic process;small molecule metabolic process	acid phosphatase activity;adenyl nucleotide binding;adenyl ribonucleotide binding;ATP binding;binding;catalytic activity;diphosphoinositol-pentakisphosphate kinase activity;hydrolase activity;hydrolase activity, acting on ester bonds;inositol 1,3,4,5,6-pentakisphosphate kinase activity;inositol hexakisphosphate 1-kinase activity;inositol hexakisphosphate 3-kinase activity;inositol hexakisphosphat…	cell part;cytoplasm;cytoplasmic part;cytosol;intracellular organelle part;intracellular part;membrane;nuclear part;nucleoplasm;organelle part;plasma membrane	3D-structure;Alternativesplicing;ATP-binding;Cellmembrane;Completeproteome;Cytoplasm;Kinase;Membrane;Nucleotide-binding;Phosphoprotein;Polymorphism;Proteomicsidentification;Referenceproteome;Transferase			8	8	8	8.3	8.3	8.3	144.36	0	42.879	819300000	36	0.490369	0.302012	0.786535	A0A087WZV0;O43314-2;O43314;H0Y9S9;A0A087WWN8;D6RBU4;F8W9A8;B7WPL9;Q6PFW1-6;Q6PFW1-5;Q6PFW1-7;Q6PFW1-4;Q6PFW1-3;Q6PFW1-2;Q6PFW1;D6RFG4;K7ENU7	A0A087WZV0;O43314-2;O43314	Inositol hexakisphosphate and diphosphoinositol-pentakisphosphate kinase 2	PPIP5K2
0.964712	0.991809	0.991329	1.01228	1.06709	1.09232	1.00789	1.01584	0.986522	0.957592	1.01811	0.944161	1.02594	1.01419	1.01303	1.00739	1.05356	1.0289	1.01676	0.994121	0.999596	1.01482	0.941047	0.995217	biological regulation;biosynthetic process;canonical Wnt receptor signaling pathway;cell differentiation;cell surface receptor linked signaling pathway;cellular biosynthetic process;cellular developmental process;cellular macromolecule biosynthetic process;cellular macromolecule metabolic process;cellular metabolic process;cellular nitrogen compound metabolic process;cellular process;cellular res…	beta-catenin binding;binding;protein binding;protein binding transcription factor activity;transcription coactivator activity;transcription cofactor activity;transcription factor binding transcription factor activity	cell part;intracellular membrane-bounded organelle;intracellular non-membrane-bounded organelle;intracellular organelle;intracellular organelle part;intracellular part;membrane-bounded organelle;non-membrane-bounded organelle;nuclear part;nucleolus;nucleoplasm;nucleus;organelle;organelle part	3D-structure;Acetylation;Activator;Alternativesplicing;Completeproteome;Nucleus;Phosphoprotein;Proteomicsidentification;Referenceproteome;Transcription;Transcriptionregulation			19	19	19	13	13	13	153.09	0	132.06	3638700000	71	0.52035	0.977961	0.996303	A0A087WZX0;Q86UU0-3;Q86UU0-4;Q86UU0-2;Q86UU0;E9PNR0	A0A087WZX0;Q86UU0-3;Q86UU0-4;Q86UU0-2;Q86UU0	B-cell CLL/lymphoma 9-like protein	BCL9L
0.948061	0.98388	1.06351	1.02879	1.04897	1.05155	1.0079	1.022	1.00328	0.996765	1.00767	1.01418	1.01321	1.01815	0.987026	1.00353	1.00751	0.999678	1.01685	0.994397	0.998202	1.01984	0.983465	0.99234	cellular macromolecule metabolic process;cellular metabolic process;cellular process;cellular protein metabolic process;electron transport chain;generation of precursor metabolites and energy;macromolecule metabolic process;macromolecule modification;metabolic process;mitochondrial electron transport, NADH to ubiquinone;oxidation-reduction process;primary metabolic process;protein metabolic proce…	catalytic activity;NADH dehydrogenase (quinone) activity;NADH dehydrogenase (ubiquinone) activity;NADH dehydrogenase activity;oxidoreductase activity;oxidoreductase activity, acting on NADH or NADPH;oxidoreductase activity, acting on NADH or NADPH, quinone or similar compound as acceptor	cell part;cytoplasmic part;integral to membrane;intracellular membrane-bounded organelle;intracellular organelle;intracellular organelle part;intracellular part;intrinsic to membrane;macromolecular complex;membrane;membrane part;membrane-bounded organelle;mitochondrial inner membrane;mitochondrial membrane;mitochondrial membrane part;mitochondrial part;mitochondrial respiratory chain complex I;mi…	Acetylation;Alternativesplicing;Completeproteome;Electrontransport;Membrane;Mitochondrion;Mitochondrioninnermembrane;Proteomicsidentification;Referenceproteome;Respiratorychain;Transmembrane;Transmembranehelix;Transport;Ublconjugationpathway	Alzheimer's disease;Huntington's disease;Oxidative phosphorylation;Parkinson's disease		5	5	5	48.5	48.5	48.5	11.716	0	8.768	1183100000	30	0.498385	0.662642	0.91385	A0A087WZX2;O95139;O95139-2;Q7Z6M2	A0A087WZX2;O95139;O95139-2	NADH dehydrogenase [ubiquinone] 1 beta subcomplex subunit 6	NDUFB6
0.983634	1.02959	1.08837	1.03601	1.03389	1.08714	1.01271	1.01614	1.00392	0.994958	1.00313	0.924778	1.02734	1.01777	0.99242	1.01399	1.03904	0.991653	1.01876	1.00943	0.991037	1.00695	1.00802	1.01923	anatomical structure development;anatomical structure formation involved in morphogenesis;anatomical structure morphogenesis;anterior/posterior pattern specification;antigen processing and presentation;antigen processing and presentation of exogenous antigen;antigen processing and presentation of exogenous peptide antigen;antigen processing and presentation of exogenous peptide antigen via MHC cl…	adenyl nucleotide binding;adenyl ribonucleotide binding;ATP binding;ATPase activity;binding;catalytic activity;cytoskeletal protein binding;hydrolase activity;hydrolase activity, acting on acid anhydrides;hydrolase activity, acting on acid anhydrides, in phosphorus-containing anhydrides;microtubule motor activity;motor activity;nucleoside-triphosphatase activity;nucleotide binding;plus-end-direct…	axoneme;axoneme part;cell part;cell projection;cell projection part;centrosome;cilium;clathrin-coated vesicle;coated vesicle;cytoplasmic membrane-bounded vesicle;cytoplasmic part;cytoplasmic vesicle;cytoskeletal part;cytoskeleton;cytosol;extracellular membrane-bounded organelle;extracellular organelle;extracellular region part;extracellular vesicular exosome;intracellular membrane-bounded organel…	ATP-binding;Cellprojection;Cilium;Ciliumbiogenesis/degradation;Coiledcoil;Completeproteome;Cytoplasm;Cytoskeleton;Microtubule;Motorprotein;Nucleotide-binding;Phosphoprotein;Polymorphism;Proteomicsidentification;Referenceproteome			15	13	13	22.3	19	19	82.764	0	39.27	1372300000	36	0.983876	0.7399	0.775718	A0A087X011;E9PES4;J3KPF9;Q9Y496;H7C2F6;C9J9X2	A0A087X011;E9PES4;J3KPF9;Q9Y496	Kinesin-like protein;Kinesin-like protein KIF3A	KIF3A
0.999128	1.03011	1.09499	1.03522	1.10501	1.11229	1.00726	1.02084	1.00851	1.00675	1.009	1.11994	1.01527	1.00734	0.990118	1.00976	0.941697	0.979267	1.02297	1.03009	0.959611	0.988664	1.11293	1.02248	anatomical structure development;biological regulation;biomineral tissue development;bone marrow development;bone mineralization;cell chemotaxis;cell cycle process;cell migration;cell motility;cell proliferation;cellular component assembly;cellular component assembly at cellular level;cellular component biogenesis;cellular component biogenesis at cellular level;cellular component movement;cellula…	binding;cytoskeletal protein binding;microtubule binding;nucleic acid binding;protein binding;ribonucleoprotein binding;ribosome binding;RNA binding;rRNA binding;tubulin binding	cell part;cytoplasm;cytoskeletal part;intracellular membrane-bounded organelle;intracellular non-membrane-bounded organelle;intracellular organelle;intracellular organelle part;intracellular part;membrane-bounded organelle;non-membrane-bounded organelle;nuclear part;nucleolus;nucleoplasm;nucleus;organelle;organelle part;spindle pole	3D-structure;Acetylation;Completeproteome;Cytoplasm;Cytoskeleton;Directproteinsequencing;Diseasemutation;Nucleus;Proteomicsidentification;Referenceproteome;Ribosomebiogenesis	Ribosome biogenesis in eukaryotes		19	19	19	56	56	56	28.864	0	99.329	9012800000	109	0.247918	0.688134	0.834874	A0A087X020;Q9Y3A5;F8WE72	A0A087X020;Q9Y3A5	Ribosome maturation protein SBDS	SBDS
0.928905	1.0112	1.24861	1.18226	1.16112	1.12585	0.927028	0.983159	1.01299	1.01826	0.816368	1.03359	1.01119	1.00288	0.978474	1.00975	0.938721	0.986595	0.999698	0.890288	1.01965	1.09117	1.13125	0.87748	activation of anaphase-promoting complex activity;activation of immune response;activation of mitotic anaphase-promoting complex activity;aging;anatomical structure development;anatomical structure formation involved in morphogenesis;anatomical structure morphogenesis;angiogenesis;antigen receptor-mediated signaling pathway;apoptosis;axonogenesis;behavior;behavioral interaction between organisms;…	anaphase-promoting complex binding;binding;catalytic activity;cation binding;enzyme binding;hydrolase activity;hydrolase activity, acting on ester bonds;inositol or phosphatidylinositol phosphatase activity;inositol phosphate phosphatase activity;inositol tetrakisphosphate phosphatase activity;inositol-1,3,4,5-tetrakisphosphate 3-phosphatase activity;ion binding;lipid binding;lipid phosphatase ac…	cell part;cell projection;cell projection part;cytoplasm;cytoplasmic part;cytosol;dendritic spine;extracellular region;internal side of plasma membrane;intracellular membrane-bounded organelle;intracellular organelle;intracellular organelle part;intracellular part;membrane;membrane part;membrane-bounded organelle;mitochondrion;myelin sheath adaxonal region;neuron projection;neuron spine;nuclear b…	3D-structure;Acetylation;Alternativeinitiation;Alternativesplicing;Apoptosis;Completeproteome;Cytoplasm;Diseasemutation;Hydrolase;Isopeptidebond;Lipid-binding;Lipidmetabolism;Neurogenesis;Nucleus;Phosphoprotein;Polymorphism;Proteinphosphatase;Proteomicsidentification;Referenceproteome;Secreted;Tumorsuppressor;Ublconjugation	Endometrial cancer;Focal adhesion;Glioma;Inositol phosphate metabolism;Melanoma;p53 signaling pathway;Pathways in cancer;Phosphatidylinositol signaling system;Prostate cancer;Small cell lung cancer;Tight junction		2	2	2	10.5	10.5	10.5	17.83	0.0099319	1.2068	42383000	5	0.160531	0.707616	0.949423	A0A087X033;P60484;P60484-2	A0A087X033;P60484;P60484-2	Phosphatidylinositol 3,4,5-trisphosphate 3-phosphatase and dual-specificity protein phosphatase PTEN	PTEN
1.01419	0.971147	0.923875	0.952068	1.06328	1.03316	1.06396	0.94792	0.947426	0.983268	1.05011	0.805978	1.01933	1.01468	0.989038	1.0079	1.02292	0.982833	1.07649	1.07411	1.04189	1.0416	0.742515	0.962649	biological regulation;negative regulation of biological process;negative regulation of biosynthetic process;negative regulation of cellular biosynthetic process;negative regulation of cellular metabolic process;negative regulation of cellular process;negative regulation of macromolecule metabolic process;negative regulation of metabolic process;negative regulation of nitrogen compound metabolic p…		cell part;cytoplasm;cytoplasmic part;Golgi apparatus;intracellular membrane-bounded organelle;intracellular organelle;intracellular organelle part;intracellular part;membrane-bounded organelle;nuclear part;nucleoplasm;nucleus;organelle;organelle part	Acetylation;Completeproteome;Cytoplasm;Nucleus;Phosphoprotein;Polymorphism;Proteomicsidentification;Referenceproteome			3	3	3	13.2	13.2	13.2	23.468	0.00016106	3.0613	353810000	7	0.348276	0.716358	0.744414	G3V2W9;A0A087X060;Q56P03	G3V2W9;A0A087X060;Q56P03	E2F-associated phosphoprotein	EAPP
1.005	1.02274	0.971835	1.00425	1.1133	1.11819	0.997013	1.00636	0.980387	0.932106	1.01538	0.913448	1.02802	1.01644	0.99589	1.00279	1.10149	1.01803	1.00557	1.02462	0.987103	0.999772	0.946193	0.968729	biological regulation;biosynthetic process;cell surface receptor linked signaling pathway;cellular biosynthetic process;cellular macromolecule metabolic process;cellular metabolic process;cellular nitrogen compound metabolic process;cellular process;cellular response to stimulus;gene expression;macromolecule metabolic process;metabolic process;nitrogen compound metabolic process;Notch signaling p…	protein binding transcription factor activity;transcription coactivator activity;transcription cofactor activity;transcription factor binding transcription factor activity	cell part;cytoplasmic part;Golgi apparatus;intracellular membrane-bounded organelle;intracellular organelle;intracellular organelle part;intracellular part;membrane-bounded organelle;nuclear body;nuclear part;nuclear speck;nucleoplasm;nucleoplasm part;nucleus;organelle;organelle part	Activator;Chromosomalrearrangement;Completeproteome;Notchsignalingpathway;Nucleus;Polymorphism;Proteomicsidentification;Referenceproteome;Transcription;Transcriptionregulation	Notch signaling pathway		1	1	1	0.9	0.9	0.9	108.01	0.003845	1.7028	110380000	4	0.212572	0.748937	0.776279	A0A087X0G5;Q8IZL2	A0A087X0G5;Q8IZL2	Mastermind-like protein 2	MAML2
0.979226	1.00586	1.06375	1.03179	1.07482	1.104	0.983741	1.00882	0.983623	0.977156	1.00194	1.04686	1.01283	1.01383	0.996638	1.0129	1.00466	1.00241	1.00576	1.00801	0.989522	1.00261	0.981687	0.999672	biological regulation;cellular macromolecule metabolic process;cellular metabolic process;cellular nitrogen compound metabolic process;cellular process;macromolecule metabolic process;metabolic process;mRNA metabolic process;mRNA processing;negative regulation of catalytic activity;negative regulation of hydrolase activity;negative regulation of molecular function;negative regulation of phosphata…	binding;cation binding;ion binding;metal ion binding;nucleic acid binding;nucleotide binding;RNA binding		Acetylation;Alternativesplicing;Coiledcoil;Completeproteome;Metal-binding;Phosphoprotein;Polymorphism;Proteomicsidentification;Referenceproteome;Repeat;RNA-binding;Zinc;Zinc-finger			24	24	22	21.2	21.2	19.9	113.79	0	62.061	1943800000	54	0.204638	0.336066	0.522843	A0A087X0H9;Q5T8P6;Q5T8P6-3;Q5T8P6-2;Q5T8P6-4;Q5T8P6-5;E2PSN0;Q5T8P6-6	A0A087X0H9;Q5T8P6;Q5T8P6-3;Q5T8P6-2;Q5T8P6-4;Q5T8P6-5	RNA-binding protein 26	RBM26
1.03522	1.08161	1.08183	1.03178	1.13652	1.12824	1.00292	1.02763	1.00626	1.00517	1.02064	1.17383	1.02899	1.02165	0.993612	1.0085	0.95818	0.997657	1.02226	1.0741	0.922351	0.942715	1.1115	1.00839	activation of protein kinase activity;biological regulation;cell cycle arrest;cell cycle process;cell surface receptor linked signaling pathway;cellular component assembly;cellular component organization;cellular component organization or biogenesis;cellular hypotonic response;cellular process;cellular response to abiotic stimulus;cellular response to chemical stimulus;cellular response to endoge…	binding;catalytic activity;enzyme activator activity;enzyme binding;enzyme regulator activity;kinase activator activity;kinase activity;kinase binding;kinase regulator activity;phosphotransferase activity, alcohol group as acceptor;protein binding;protein kinase activator activity;protein kinase activity;protein kinase regulator activity;protein serine/threonine kinase activator activity;protein …	cell part;cytoplasmic part;cytosol;extracellular membrane-bounded organelle;extracellular organelle;extracellular region part;extracellular vesicular exosome;intracellular part;membrane-bounded organelle;membrane-bounded vesicle;organelle;vesicle	3D-structure;Completeproteome;Cytoplasm;Proteomicsidentification;Referenceproteome	mTOR signaling pathway		8	8	8	23.3	23.3	23.3	39.452	0	11.013	2149000000	39	0.0663616	0.466508	0.717975	A0A087X0K1;Q9Y376;B7ZBJ4;Q5TAW7;Q9H9S4;B7ZBJ5	A0A087X0K1;Q9Y376	Calcium-binding protein 39	CAB39
0.963181	1.00772	1.0364	1.01444	1.10443	1.10791	1.01253	1.01179	0.994351	0.978089	1.01395	1.00022	1.02528	1.01463	0.99347	1.00725	1.01822	1.01567	1.00816	0.990743	0.993343	1.0203	0.955385	0.993738		binding;nucleotide binding		Alternativesplicing;Coiledcoil;Completeproteome;Polymorphism;Proteomicsidentification;Referenceproteome			5	5	5	7.8	7.8	7.8	87.882	0	34.185	312990000	10	0.312402	0.727192	0.884986	A0A087X0M0;Q7Z5L2-2;Q7Z5L2;Q7Z5L2-3	A0A087X0M0;Q7Z5L2-2;Q7Z5L2	Coiled-coil domain-containing protein R3HCC1L	R3HCC1L
0.987085	1.02288	1.05178	1.02257	1.03262	1.0313	0.995075	1.00748	0.9977	0.982382	1.03467	1.0223	1.0211	1.01896	0.99222	1.0078	1.07956	0.99962	1.01528	1.02082	0.991349	1.00866	1.01661	1.02068			cell part;cytoplasm;intracellular membrane-bounded organelle;intracellular organelle;intracellular organelle part;intracellular part;membrane;membrane-bounded organelle;nuclear part;nucleoplasm;nucleus;organelle;organelle part;plasma membrane	3D-structure;Coiledcoil;Completeproteome;Cytoplasm;Nucleus;Phosphoprotein;Polymorphism;Proteomicsidentification;Referenceproteome			18	18	18	33	33	33	82.89	0	133.11	1852900000	57	0.0802802	0.5826	0.259853	A0A087X0M4;Q9BWU0;A0A087WWF4;H7C256	A0A087X0M4;Q9BWU0	Kanadaptin	SLC4A1AP
1.00267	1.03941	0.994728	1.00697	1.11347	1.11029	0.984984	1.01632	1.0008	0.970204	0.971933	0.929262	1.02663	1.01519	0.972531	0.995908	1.03591	1.01346	1.03969	1.05776	0.980875	0.998648	0.909367	0.973318		binding;nucleic acid binding;RNA binding	cell part;cytoplasm;intracellular membrane-bounded organelle;intracellular non-membrane-bounded organelle;intracellular organelle;intracellular organelle part;intracellular part;membrane-bounded organelle;non-membrane-bounded organelle;nuclear part;nucleolus;nucleoplasm;nucleus;organelle;organelle part	Alternativesplicing;Completeproteome;Nucleus;Phosphoprotein;Proteomicsidentification;Referenceproteome			3	3	3	5.6	5.6	5.6	74.224	0	8.2504	370170000	21	0.439011	0.60487	0.965963	A0A087X0N3;Q96MY1;A0A087WTU5;O94818-4;Q96MY1-2;O94818-3;O94818;K7EQ17;O94818-2	A0A087X0N3;Q96MY1;A0A087WTU5;O94818-4;Q96MY1-2;O94818-3;O94818	Nucleolar protein 4-like;Nucleolar protein 4	NOL4L;NOL4
0.972488	0.999123	1.02369	1.02528	1.04897	1.03747	1.01066	1.02696	0.986512	0.982793	1.01185	1.05729	1.03551	1.01749	0.998369	1.01353	1.02528	1.00912	1.01848	0.995128	1.01013	1.02697	0.969864	0.988646	antigen processing and presentation;antigen processing and presentation of exogenous antigen;antigen processing and presentation of exogenous peptide antigen;antigen processing and presentation of exogenous peptide antigen via MHC class II;antigen processing and presentation of peptide antigen;antigen processing and presentation of peptide antigen via MHC class II;antigen processing and presentat…	adenyl nucleotide binding;adenyl ribonucleotide binding;ATP binding;ATPase activity;binding;catalytic activity;hydrolase activity;hydrolase activity, acting on acid anhydrides;hydrolase activity, acting on acid anhydrides, in phosphorus-containing anhydrides;kinetochore binding;microtubule motor activity;motor activity;nucleoside-triphosphatase activity;nucleotide binding;purine nucleotide bindin…	cell part;chromosomal part;chromosome;chromosome, centromeric region;condensed chromosome kinetochore;condensed chromosome outer kinetochore;condensed chromosome, centromeric region;condensed nuclear chromosome kinetochore;cytoplasm;cytoplasmic part;cytoskeletal part;cytoskeleton;cytosol;intracellular membrane-bounded organelle;intracellular non-membrane-bounded organelle;intracellular organelle;…	3D-structure;Alternativesplicing;ATP-binding;Cellcycle;Celldivision;Centromere;Chromosome;Coiledcoil;Completeproteome;Cytoplasm;Cytoskeleton;Developmentalprotein;Directproteinsequencing;Diseasemutation;Isopeptidebond;Kinetochore;Lipoprotein;Methylation;Microtubule;Mitosis;Motorprotein;Nucleotide-binding;Phosphoprotein;Polymorphism;Prenylation;Primarymicrocephaly;Proteomicsidentification;Reference…			24	24	24	9.7	9.7	9.7	312.1	0	48.475	867380000	51	0.439715	0.420475	0.704855	A0A087X0P0;Q02224-3;Q02224-2;Q02224;D6RBW0;D6RHK2	A0A087X0P0;Q02224-3;Q02224-2;Q02224	Kinesin-like protein;Centromere-associated protein E	CENPE
0.992385	1.02433	1.03411	1.00629	1.05537	1.06664	1.00611	1.0182	0.999308	0.995225	1.01032	1.03797	1.02164	1.01653	0.993756	1.00585	1.02207	1.00103	1.00795	1.01434	0.967439	0.985402	1.00967	0.994552				Acetylation;Completeproteome;Directproteinsequencing;Phosphoprotein;Proteomicsidentification;Referenceproteome;RNA-binding			16	16	10	25	25	16.6	63.674	0	86.088	6133300000	99	0.0268082	0.503872	0.787963	A0A087X0Q1;Q7Z739;A0A024R7W5;A0A087WY31;A0A087X0C3;S4R373	A0A087X0Q1;Q7Z739;A0A024R7W5;A0A087WY31	YTH domain-containing family protein 3	YTHDF3
0.982205	1.01228	1.08157	1.01546	1.13145	1.15725	1.00263	1.00959	0.996996	0.987793	1.06078	1.06941	1.02854	1.01321	0.994609	1.01668	0.910717	0.991077	0.992231	1.00679	0.985152	1.00164	1.03306	1.02397	biological regulation;cellular component organization;cellular component organization at cellular level;cellular component organization or biogenesis;cellular component organization or biogenesis at cellular level;cellular membrane organization;cellular process;endocytosis;establishment of localization;establishment of protein localization;membrane invagination;membrane organization;negative regu…	binding;enzyme binding;lipid binding;phosphatidylinositol binding;phospholipid binding;protein binding	cell part;cytoplasmic part;early endosome;endosome;extracellular membrane-bounded organelle;extracellular organelle;extracellular region part;extracellular vesicular exosome;extrinsic to membrane;intracellular membrane-bounded organelle;intracellular organelle;intracellular part;membrane part;membrane-bounded organelle;membrane-bounded vesicle;organelle;vesicle	3D-structure;Acetylation;Alternativesplicing;Completeproteome;Lipid-binding;Membrane;Phosphoprotein;Proteintransport;Proteomicsidentification;Referenceproteome;Transport			11	9	9	48.8	44.8	44.8	19.825	0	22.149	7339300000	49	0.229724	0.690426	0.682191	A0A087X0R6;Q9UMY4-2;Q9UMY4;Q9UMY4-3	A0A087X0R6;Q9UMY4-2;Q9UMY4;Q9UMY4-3	Sorting nexin-12	SNX12
0.984715	1.01418	1.05659	1.03726	1.05023	1.07341	0.999198	1.01264	1.00564	0.988533	0.99827	1.09159	1.02265	1.01216	0.983628	0.991198	0.994298	1.06272	1.01157	1.02187	0.983055	0.990488	1.06491	1.06631	axon guidance;biological adhesion;cell adhesion;cell differentiation;cellular component assembly;cellular component disassembly;cellular component disassembly at cellular level;cellular component organization;cellular component organization at cellular level;cellular component organization or biogenesis;cellular component organization or biogenesis at cellular level;cellular developmental process…	binding;growth factor binding;platelet-derived growth factor binding;protein binding	anchoring collagen;cell part;collagen;collagen type VI;cytoplasmic part;endoplasmic reticulum lumen;endoplasmic reticulum part;extracellular matrix;extracellular matrix part;extracellular membrane-bounded organelle;extracellular organelle;extracellular region;extracellular region part;extracellular vesicular exosome;intracellular organelle lumen;intracellular organelle part;intracellular part;lys…	Celladhesion;Collagen;Completeproteome;Directproteinsequencing;Diseasemutation;Extracellularmatrix;Glycoprotein;Hydroxylation;Polymorphism;Proteomicsidentification;Referenceproteome;Repeat;Secreted;Signal	ECM-receptor interaction;Focal adhesion;Protein digestion and absorption		6	6	6	7.7	7.7	7.7	108.34	0	18.363	286610000	13	0.00723074	0.192572	0.125995	A0A087X0S5;P12109	A0A087X0S5;P12109	Collagen alpha-1(VI) chain	COL6A1
0.959854	0.993695	1.0406	1.01233	1.11847	1.1399	1.02463	1.01227	1.01193	0.990625	1.02468	1.07433	1.03347	1.00663	0.977157	1.00096	0.980412	0.983347	1.00224	0.980115	0.984231	1.00406	0.992427	0.999112	acyl-CoA metabolic process;carboxylic acid metabolic process;cellular ketone metabolic process;cellular lipid metabolic process;cellular metabolic process;cellular process;coenzyme metabolic process;cofactor metabolic process;fatty acid metabolic process;lipid metabolic process;long-chain fatty acid metabolic process;metabolic process;monocarboxylic acid metabolic process;organic acid metabolic p…	acyl-CoA hydrolase activity;acyl-CoA thioesterase activity;binding;carboxylic ester hydrolase activity;catalytic activity;CoA hydrolase activity;hydrolase activity;hydrolase activity, acting on ester bonds;palmitoyl-CoA hydrolase activity;protein binding;receptor binding;thiolester hydrolase activity	cell part;cytoplasmic part;cytosol;extracellular membrane-bounded organelle;extracellular organelle;extracellular region part;extracellular vesicular exosome;intracellular membrane-bounded organelle;intracellular organelle;intracellular part;membrane-bounded organelle;membrane-bounded vesicle;mitochondrion;organelle;vesicle	3D-structure;Acetylation;Alternativesplicing;Completeproteome;Cytoplasm;Directproteinsequencing;Hydrolase;Mitochondrion;Polymorphism;Proteomicsidentification;Referenceproteome;Serineesterase;Transitpeptide	Biosynthesis of unsaturated fatty acids		7	7	6	22.5	22.5	19.7	43.733	0	23.171	14040000000	35	0.116081	0.759656	0.571301	G3V4F2;A0A087X0W7;Q86TX2;A0A087WT95;P49753;P49753-2	G3V4F2;A0A087X0W7;Q86TX2;A0A087WT95;P49753;P49753-2	Acyl-coenzyme A thioesterase 1;Acyl-coenzyme A thioesterase 2, mitochondrial	ACOT1;ACOT2
1.0027	1.03691	1.05938	1.02035	1.05184	1.0682	1.00777	1.0154	0.997427	0.97934	1.03045	1.11884	1.01534	1.0114	0.989381	1.00692	0.937821	0.982237	1.00732	1.02348	0.967758	0.986472	1.03574	1.00419	acetaldehyde metabolic process;activation of immune response;activation of innate immune response;aging;anatomical structure development;anatomical structure morphogenesis;antigen receptor-mediated signaling pathway;biological regulation;cell surface receptor linked signaling pathway;cellular aldehyde metabolic process;cellular defense response;cellular metabolic process;cellular process;cellular…	activating transcription factor binding;anion binding;binding;chromatin binding;core promoter proximal region DNA binding;core promoter proximal region sequence-specific DNA binding;DNA binding;enhancer binding;enhancer sequence-specific DNA binding;enzyme binding;histone deacetylase binding;identical protein binding;ion binding;kinase binding;NF-kappaB binding;nucleic acid binding;nucleic acid b…	cell part;cytoplasm;cytoplasmic part;cytosol;I-kappaB/NF-kappaB complex;intracellular membrane-bounded organelle;intracellular organelle;intracellular organelle part;intracellular part;macromolecular complex;membrane-bounded organelle;NF-kappaB complex;nuclear part;nucleoplasm;nucleoplasm part;nucleus;organelle;organelle part;protein complex;transcription factor complex	3D-structure;Acetylation;Activator;Alternativesplicing;Chromosomalrearrangement;Completeproteome;Cytoplasm;DNA-binding;Host-virusinteraction;Isopeptidebond;Methylation;Nucleus;Phosphoprotein;Proteomicsidentification;Referenceproteome;S-nitrosylation;Transcription;Transcriptionregulation;Ublconjugation	Acute myeloid leukemia;Adipocytokine signaling pathway;Amoebiasis;Apoptosis;B cell receptor signaling pathway;Chagas disease (American trypanosomiasis);Chemokine signaling pathway;Chronic myeloid leukemia;Cytosolic DNA-sensing pathway;Epithelial cell signaling in Helicobacter pylori infection;Hepatitis C;ko05152;Leishmaniasis;MAPK signaling pathway;Measles;Neurotrophin signaling pathway;NOD-like …		9	9	9	27.9	27.9	27.9	42.868	0	55.258	2782700000	38	0.295218	0.377765	0.480724	Q2TAM5;A0A087X0W8;Q04206-2;Q04206-3;Q04206;E9PKV4;A0A087WVP0;E9PKH5;Q04206-4;E9PI38;E9PQS6;E9PMD5;E9PRX2;E9PJR1;E9PNV4;E9PJZ9;E9PM47;E9PNK5;E9PN69	Q2TAM5;A0A087X0W8;Q04206-2;Q04206-3;Q04206;E9PKV4;A0A087WVP0;E9PKH5;Q04206-4;E9PI38;E9PQS6;E9PMD5	Transcription factor p65	RELA
0.989101	1.02048	1.02162	1.02055	1.11	1.13008	1.02967	1.02933	0.989559	0.988279	1.00702	1.03861	1.03528	1.01845	1.00177	1.00969	0.959761	0.966483	1.01902	1.01108	0.995077	1.00585	0.998651	0.992239		catalytic activity;cysteine-type peptidase activity;hydrolase activity;peptidase activity;peptidase activity, acting on L-amino acid peptides		Acetylation;Alternativesplicing;Completeproteome;Hydrolase;Polymorphism;Protease;Proteomicsidentification;Referenceproteome;Thiolprotease;Ublconjugationpathway			6	6	6	17.6	17.6	17.6	37.325	0	9.1262	1473100000	19	0.477903	0.617531	0.81962	A0A087X0W9;Q8N6M0;Q8N6M0-2	A0A087X0W9;Q8N6M0;Q8N6M0-2	OTU domain-containing protein 6B	OTUD6B
0.891254	0.994806	1.06626	0.841304	1.0128	0.998583	1.10535	1.08243	1.02857	0.990079	0.991459	0.905984	1.00796	1.02594	0.989408	0.995017	0.983264	0.988711	0.95813	0.944996	0.956024	1.01057	0.963056	0.963949		binding;calcium ion binding;calcium-dependent phospholipid binding;cation binding;ion binding;lipid binding;metal ion binding;phospholipid binding	cell part;cytoplasmic part;intracellular membrane-bounded organelle;intracellular organelle;intracellular part;membrane-bounded organelle;mitochondrion;organelle	Annexin;Completeproteome;Polymorphism;Proteomicsidentification;Referenceproteome;Repeat			1	1	1	5	5	5	37.111	0	22.288	40409000	10	0.752588	0.541098	0.519932	A0A087X0X1;Q9UJ72	A0A087X0X1;Q9UJ72	Annexin A10	ANXA10
0.992815	1.02836	1.06228	1.02816	1.08314	1.08077	1.00853	1.01158	1.00594	1.00164	1.0059	1.06688	1.02772	1.01434	0.991538	1.0136	0.958316	0.998734	1.01974	1.02507	0.981219	0.996467	1.03759	1.00503		binding;carbohydrate binding	cell part;integral to membrane;intrinsic to membrane;membrane;membrane part	Completeproteome;Glycoprotein;Membrane;Phosphoprotein;Polymorphism;Proteomicsidentification;Referenceproteome;Signal;Transmembrane;Transmembranehelix			25	25	1	22.6	22.6	1.3	139.47	0	169.15	8782600000	161	0.385157	0.484544	0.698027	A0A087X117;Q15155;A0A087WW46;H3BUC9;H3BPS9;I3L0Q6;H3BTW1	A0A087X117;Q15155;A0A087WW46	Nodal modulator 1	NOMO1
0.976183	1.03537	1.05785	1.01785	1.10646	1.15343	0.994096	1.01167	0.992584	1.00369	0.987959	1.15138	1.00865	1.03691	0.994647	0.979875	1.09492	0.998999	1.0231	1.01697	1.00716	1.01086	1.05153	1.00211		binding;GTP binding;guanyl nucleotide binding;guanyl ribonucleotide binding;nucleotide binding;purine nucleotide binding;purine ribonucleoside triphosphate binding;purine ribonucleotide binding;ribonucleotide binding	cell part;cytoplasm;cytoskeleton;intracellular non-membrane-bounded organelle;intracellular organelle;intracellular part;non-membrane-bounded organelle;organelle	Acetylation;Alternativesplicing;Coiledcoil;Completeproteome;Cytoplasm;Cytoskeleton;GTP-binding;Nucleotide-binding;Phosphoprotein;Proteomicsidentification;Referenceproteome			10	6	6	23.7	14.1	14.1	49.355	0	22.5	617170000	16	0.00867599	0.45544	0.480464	A0A087X142;A6NMH6;A6NFQ9;F8W8I8;Q92599-2;Q92599-4;Q92599;Q92599-3;C9JV02;A0A0A0MRP8;C9J4G8	A0A087X142;A6NMH6;A6NFQ9;F8W8I8;Q92599-2;Q92599-4;Q92599;Q92599-3	Septin-8	2008-09-01
0.975572	1.04885	1.11542	1.0529	1.11213	1.12954	1.00974	1.02913	1.00007	0.993805	1.01332	1.06629	1.01598	1.01371	1.00101	1.01762	0.930739	0.987383	1.03091	1.04665	0.967753	0.997628	1.10222	1.05247	biological regulation;cell redox homeostasis;cellular homeostasis;cellular macromolecule metabolic process;cellular metabolic process;cellular process;cellular protein metabolic process;homeostatic process;macromolecule metabolic process;metabolic process;primary metabolic process;protein folding;protein metabolic process;regulation of biological process;regulation of biological quality;regulatio…	catalytic activity;flavin-linked sulfhydryl oxidase activity;intramolecular oxidoreductase activity;intramolecular oxidoreductase activity, interconverting keto- and enol-groups;intramolecular oxidoreductase activity, transposing S-S bonds;isomerase activity;oxidoreductase activity;oxidoreductase activity, acting on a sulfur group of donors;oxidoreductase activity, acting on a sulfur group of don…	cell part;cytoplasmic part;extracellular region part;extracellular space;Golgi apparatus part;integral to Golgi membrane;integral to membrane;integral to organelle membrane;intracellular organelle part;intracellular part;intrinsic to Golgi membrane;intrinsic to membrane;intrinsic to organelle membrane;membrane;membrane part;nuclear membrane;nuclear part;organelle membrane;organelle part;plasma me…	Cellmembrane;Completeproteome;Disulfidebond;FAD;Flavoprotein;Glycoprotein;Membrane;Nucleus;Oxidoreductase;Phosphoprotein;Polymorphism;Proteomicsidentification;Referenceproteome;Secreted;Signal;Transmembrane;Transmembranehelix			10	10	10	16.8	16.8	16.8	77.249	0	19.545	867950000	33	0.503082	0.600904	0.814685	A0A087X176;Q6ZRP7;H0Y430	A0A087X176;Q6ZRP7	Sulfhydryl oxidase;Sulfhydryl oxidase 2	QSOX2
0.970018	1.03097	1.07034	1.04953	1.09169	1.13431	1.03169	1.0177	0.98415	0.990569	1.0354	1.05908	1.05747	1.04423	0.996932	1.02548	1.0042	1.027	1.0424	1.0059	0.998612	1.0181	0.97027	1.05143	actin cytoskeleton organization;actin filament-based process;anatomical structure development;biological regulation;biosynthetic process;catabolic process;cell communication;cell-cell signaling;cellular biosynthetic process;cellular catabolic process;cellular component organization;cellular component organization at cellular level;cellular component organization or biogenesis;cellular component o…	ATPase binding;binding;catalytic activity;cysteine-type peptidase activity;enzyme binding;exopeptidase activity;hydrolase activity;identical protein binding;omega peptidase activity;peptidase activity;peptidase activity, acting on L-amino acid peptides;protein binding;small conjugating protein-specific protease activity;ubiquitin protein ligase binding;ubiquitin-specific protease activity	cell part;cytoplasm;cytoplasmic part;cytosol;inclusion body;intracellular membrane-bounded organelle;intracellular organelle;intracellular organelle lumen;intracellular organelle part;intracellular part;membrane;membrane-bounded organelle;membrane-enclosed lumen;mitochondrial matrix;mitochondrial membrane;mitochondrial part;nuclear inclusion body;nuclear matrix;nuclear part;nucleoplasm;nucleus;or…	3D-structure;Alternativesplicing;Completeproteome;Hydrolase;Isopeptidebond;Neurodegeneration;Nucleus;Phosphoprotein;Polymorphism;Protease;Proteomicsidentification;Referenceproteome;Repeat;Spinocerebellarataxia;Thiolprotease;Transcription;Transcriptionregulation;Tripletrepeatexpansion;Ublconjugation;Ublconjugationpathway	Protein processing in endoplasmic reticulum		4	4	4	18.3	18.3	18.3	31.61	0	9.1417	191350000	17	0.352426	0.351693	0.460592	G3V4U9;D3VVH9;A0A0A0MS38;A0A087X1A8;G3V3R7;F5H211;P54252-4;P54252-2;P54252;G3V2G2;S4R399;G3V526;E9PJN5;G3V2G1;G3V3T6;G3V328;A0A087WXY4;C9JQV6;P54252-5;P54252-3;G3V3A6;D3VVP3;D6R9I5;G3V4B1;G3V390;G3V3S5;G3V4F5;G3V4F4;G3V5H3	G3V4U9;D3VVH9;A0A0A0MS38;A0A087X1A8;G3V3R7;F5H211;P54252-4;P54252-2;P54252;G3V2G2;S4R399;G3V526;E9PJN5;G3V2G1;G3V3T6;G3V328;A0A087WXY4;C9JQV6;P54252-5;P54252-3	Ataxin-3	ATXN3
0.975917	1.01779	1.09374	1.05109	1.11575	1.12286	1.00333	1.0176	1.00851	1.00535	0.993437	1.16615	1.01899	1.01251	0.990086	1.01516	0.908071	0.981736	1.02056	1.02455	0.922963	0.964261	1.13952	1.04294	actin cytoskeleton organization;actin filament-based process;biological regulation;cell projection assembly;cell projection organization;cellular component assembly;cellular component assembly at cellular level;cellular component movement;cellular component organization;cellular component organization at cellular level;cellular component organization or biogenesis;cellular component organization …	binding;enzyme binding;GTP binding;GTPase binding;GTP-dependent protein binding;guanyl nucleotide binding;guanyl ribonucleotide binding;lipid binding;nucleotide binding;phosphatidylinositol binding;phosphatidylinositol-4-phosphate binding;phospholipid binding;protein binding;purine nucleotide binding;purine ribonucleoside triphosphate binding;purine ribonucleotide binding;Rac GTPase binding;Ras G…	cell cortex;cell part;cell projection;cytoplasm;cytoplasmic part;Golgi apparatus part;Golgi membrane;intracellular organelle part;intracellular part;membrane;organelle membrane;organelle part;plasma membrane;ruffle;trans-Golgi network membrane	3D-structure;Alternativesplicing;Completeproteome;Proteomicsidentification;Referenceproteome			8	8	8	25.4	25.4	25.4	41.595	0	20.831	927350000	22	0.243351	0.509055	0.776344	A0A087X1E4;P53365;P53365-3;P53365-2;E9PPY7;E9PRV8	A0A087X1E4;P53365;P53365-3;P53365-2	Arfaptin-2	ARFIP2
0.997749	1.0258	1.10624	1.05027	1.05704	1.05711	1.0164	1.03721	1.00481	1.00324	0.969472	1.07079	1.03052	1.02114	0.98393	1.01012	0.93462	0.990004	1.01528	1.02913	0.95645	0.981079	1.17004	1.07399	biological regulation;biosynthetic process;cellular biosynthetic process;cellular macromolecule biosynthetic process;cellular macromolecule metabolic process;cellular metabolic process;cellular nitrogen compound metabolic process;cellular process;gene expression;macromolecule biosynthetic process;macromolecule metabolic process;metabolic process;nitrogen compound metabolic process;nucleic acid me…	catalytic activity;DNA-directed RNA polymerase activity;nucleotidyltransferase activity;protein binding transcription factor activity;RNA polymerase activity;RNA polymerase II transcription cofactor activity;RNA polymerase II transcription factor binding transcription factor activity;transcription cofactor activity;transcription factor binding transcription factor activity;transferase activity;tr…	cell part;intracellular organelle part;intracellular part;macromolecular complex;mediator complex;nuclear part;nucleoplasm;nucleoplasm part;organelle part;protein complex	Activator;Alternativesplicing;Completeproteome;Directproteinsequencing;Nucleus;Proteomicsidentification;Referenceproteome;Transcription;Transcriptionregulation			4	4	4	21.3	21.3	21.3	23.103	0	12.978	639880000	23	0.719739	0.836737	0.963068	A0A087X1F4;Q9H944;B7ZBQ3;Q9H944-2;A6PVP4;B7ZBQ1	A0A087X1F4;Q9H944;B7ZBQ3;Q9H944-2;A6PVP4	Mediator of RNA polymerase II transcription subunit 20	MED20
0.967723	1.00817	0.966943	1.00746	1.09488	1.12977	1.00196	1.02091	0.997795	0.966852	0.996923	0.950551	1.02352	1.01485	0.982072	1.00512	0.952828	0.991629	1.0044	1.01095	1.00922	1.01523	0.942739	1.01122	cellular macromolecule metabolic process;cellular metabolic process;cellular process;cellular protein metabolic process;'de novo' posttranslational protein folding;'de novo' protein folding;macromolecule metabolic process;metabolic process;primary metabolic process;protein folding;protein metabolic process	binding;selenium binding	cell part;cytoplasmic part;endoplasmic reticulum lumen;endoplasmic reticulum part;extracellular membrane-bounded organelle;extracellular organelle;extracellular region part;extracellular vesicular exosome;intracellular organelle lumen;intracellular organelle part;intracellular part;membrane-bounded organelle;membrane-bounded vesicle;membrane-enclosed lumen;organelle;organelle lumen;organelle part…	Alternativesplicing;Completeproteome;Directproteinsequencing;Endoplasmicreticulum;Proteomicsidentification;Referenceproteome;Selenocysteine;Signal			5	5	5	29.3	29.3	29.3	17.942	0	21.236	759390000	20	0.796854	0.419045	0.931135	A0A087X1G7;O60613;A0A087WXL0;A8MZD0;O60613-2	A0A087X1G7;O60613	15 kDa selenoprotein	2015-09-01
0.990844	1.03222	1.13561	1.07516	1.29318	1.27617	1.00926	1.01149	1.00122	0.988078	1.0258	1.16884	1.01971	1.02134	1.01286	1.02153	0.963445	0.995292	1.01438	1.01508	0.966951	0.979418	1.08629	1.0293		binding;cation binding;enzyme activator activity;enzyme regulator activity;GTPase activator activity;GTPase regulator activity;ion binding;metal ion binding;nucleoside-triphosphatase regulator activity;transition metal ion binding;zinc ion binding	cell part;cytoplasmic part;endosomal part;endosome membrane;intracellular organelle part;intracellular part;membrane;organelle membrane;organelle part	ANKrepeat;Coiledcoil;Completeproteome;Endosome;GTPaseactivation;Membrane;Metal-binding;Phosphoprotein;Proteomicsidentification;Referenceproteome;Repeat;Zinc;Zinc-finger	Endocytosis		8	8	8	9.1	9.1	9.1	88.02	0	11.075	409390000	14	0.0679648	0.785814	0.739294	A0A087X1H5;Q15057;H7C3K3;H7C3Q8;C9J8L1	A0A087X1H5;Q15057	Arf-GAP with coiled-coil, ANK repeat and PH domain-containing protein 2	ACAP2
0.958411	0.993425	1.11551	1.02296	1.11459	1.07229	1.00832	1.03168	1.03196	1.02533	1.02223	1.09389	1.0281	1.01116	0.966863	0.992959	0.97756	1.00767	1.03128	0.965195	1.01108	1.03347	1.00096	1.01609			extracellular membrane-bounded organelle;extracellular organelle;extracellular region part;extracellular vesicular exosome;membrane-bounded organelle;membrane-bounded vesicle;organelle;vesicle	Alternativesplicing;Coiledcoil;Completeproteome;Phosphoprotein;Polymorphism;Proteomicsidentification;Referenceproteome			4	4	4	5.7	5.7	5.7	91.818	0	7.0321	100750000	11	0.275789	0.979082	0.632303	A0A087X1I8;Q7Z3E5-2;Q7Z3E5;H7C3U7;H7BZY2;C9J535;C9JW07;H7BZA2	A0A087X1I8;Q7Z3E5-2;Q7Z3E5;H7C3U7;H7BZY2	LisH domain-containing protein ARMC9	ARMC9
1.01091	1.04174	1.03907	1.01534	1.11421	1.14172	1.00973	1.01485	1.0128	1.00006	1.03655	1.12724	1.02827	1.02107	0.982461	1.00768	0.93613	0.98499	1.04008	1.02208	1.00493	1.02378	1.00475	0.986876	biological regulation;carboxylic acid metabolic process;catabolic process;cellular catabolic process;cellular ketone metabolic process;cellular lipid metabolic process;cellular macromolecule catabolic process;cellular macromolecule metabolic process;cellular metabolic process;cellular process;cellular protein metabolic process;fatty acid metabolic process;lipid metabolic process;lipoprotein catab…	carboxylic ester hydrolase activity;catalytic activity;hydrolase activity;hydrolase activity, acting on ester bonds;lipase activity;lysophospholipase activity;palmitoyl-(protein) hydrolase activity;phospholipase activity;thiolester hydrolase activity	cell part;cytoplasmic part;cytosol;extracellular membrane-bounded organelle;extracellular organelle;extracellular region part;extracellular vesicular exosome;intracellular membrane-bounded organelle;intracellular organelle;intracellular part;membrane-bounded organelle;membrane-bounded vesicle;mitochondrion;organelle;vesicle	3D-structure;Acetylation;Alternativesplicing;Completeproteome;Cytoplasm;Fattyacidmetabolism;Hydrolase;Lipidmetabolism;Polymorphism;Proteomicsidentification;Referenceproteome	Glycerophospholipid metabolism		4	4	4	23.5	23.5	23.5	17.981	0	13.986	2115400000	30	0.27122	0.348758	0.36943	A0A087X1K9;E5RGR0;O75608-2;O75608;B4DP64;E5RJ48;E5RI35	A0A087X1K9;E5RGR0;O75608-2;O75608;B4DP64;E5RJ48;E5RI35	Acyl-protein thioesterase 1	LYPLA1
0.975719	1.01355	0.919534	0.968036	1.07626	1.08274	1.00843	1.01944	0.951947	0.922834	1.01343	0.854644	1.02725	1.0042	1.01757	1.00154	1.17038	1.05543	1.03148	1.04997	0.95315	0.987275	0.88088	0.951082	biological regulation;cellular component organization;cellular component organization at cellular level;cellular component organization or biogenesis;cellular component organization or biogenesis at cellular level;cellular macromolecule metabolic process;cellular metabolic process;cellular process;cellular protein metabolic process;chromatin modification;chromatin organization;chromosome organiza…	binding;enzyme inhibitor activity;enzyme regulator activity;identical protein binding;kinase inhibitor activity;kinase regulator activity;protein binding;protein kinase inhibitor activity;protein kinase regulator activity	Ada2/Gcn5/Ada3 transcription activator complex;cell part;cytoplasm;histone acetyltransferase complex;intracellular membrane-bounded organelle;intracellular non-membrane-bounded organelle;intracellular organelle;intracellular organelle part;intracellular part;macromolecular complex;membrane-bounded organelle;non-membrane-bounded organelle;nuclear part;nucleolus;nucleoplasm part;nucleus;organelle;o…	Acetylation;Alternativesplicing;Completeproteome;Cytoplasm;Nucleus;Phosphoprotein;Polymorphism;Proteomicsidentification;Referenceproteome;Repeat			4	4	4	14.9	14.9	14.9	32.057	0	14.198	289910000	7	0.273532	0.847336	0.766162	S4R3N2;A0A087X1L0;S4R2X9;Q9NS73-2;Q9NS73-5;Q9NS73;S4R3P6;Q9NS73-3;S4R3Y0	S4R3N2;A0A087X1L0;S4R2X9;Q9NS73-2;Q9NS73-5;Q9NS73;S4R3P6;Q9NS73-3	MAP3K12-binding inhibitory protein 1	MBIP
0.982133	1.0289	1.01283	0.999068	1.03154	1.02612	1.01189	1.01853	0.993924	0.990239	1.01554	1.03117	1.02294	1.01517	1.00122	1.02717	0.937107	0.997267	1.00426	0.995092	0.984955	0.999076	0.931264	0.947906	biological regulation;biosynthetic process;calcium ion homeostasis;catabolic process;cation homeostasis;cellular biosynthetic process;cellular macromolecule biosynthetic process;cellular macromolecule metabolic process;cellular metabolic process;cellular nitrogen compound metabolic process;cellular process;cellular protein metabolic process;cellular response to chemical stimulus;cellular response…	acid-amino acid ligase activity;binding;catalytic activity;cation binding;chromatin binding;DNA binding;estrogen response element binding;histone acetyl-lysine binding;histone binding;ion binding;kinase activity;ligase activity;ligase activity, forming carbon-nitrogen bonds;metal ion binding;nucleic acid binding;p53 binding;phosphotransferase activity, alcohol group as acceptor;protein binding;pr…	cell part;chromatin;chromosomal part;cytoplasmic part;cytosol;euchromatin;intracellular;intracellular membrane-bounded organelle;intracellular organelle;intracellular organelle part;intracellular part;membrane-bounded organelle;nuclear chromatin;nuclear chromosome part;nuclear euchromatin;nuclear part;nucleoplasm;nucleus;organelle;organelle part;perichromatin fibrils	3D-structure;Alternativesplicing;Bromodomain;Chromosomalrearrangement;Coiledcoil;Completeproteome;Cytoplasm;Directproteinsequencing;DNA-binding;Isopeptidebond;Ligase;Metal-binding;Nucleus;Phosphoprotein;Polymorphism;Proteomicsidentification;Referenceproteome;Repeat;Repressor;Transcription;Transcriptionregulation;Tumorsuppressor;Ublconjugation;Ublconjugationpathway;Zinc;Zinc-finger			12	12	12	14.1	14.1	14.1	113.05	0	72.968	2846400000	26	0.574914	0.125452	0.416995	A0A087X1V3;O15164-2;O15164	A0A087X1V3;O15164-2;O15164	Transcription intermediary factor 1-alpha	TRIM24
1.00129	1.03299	1.08189	1.02812	1.0392	1.04728	1.00422	1.01976	1.00068	0.991122	1.02816	1.10624	1.02448	1.01749	0.998459	1.01516	1.04066	0.999939	1.01375	1.03253	0.949734	0.96556	1.08274	1.00526	activation of immune response;activation of innate immune response;anaphase-promoting complex-dependent proteasomal ubiquitin-dependent protein catabolic process;antigen processing and presentation;antigen processing and presentation of exogenous antigen;antigen processing and presentation of exogenous peptide antigen;antigen processing and presentation of exogenous peptide antigen via MHC class …		cell part;cytoplasmic part;cytosol;extracellular membrane-bounded organelle;extracellular organelle;extracellular region part;extracellular vesicular exosome;intracellular organelle part;intracellular part;macromolecular complex;membrane;membrane-bounded organelle;membrane-bounded vesicle;nuclear part;nucleoplasm;organelle;organelle part;proteasome activator complex;proteasome complex;protein com…	Acetylation;Completeproteome;Directproteinsequencing;Phosphoprotein;Polymorphism;Proteasome;Proteomicsidentification;Referenceproteome	Antigen processing and presentation;Proteasome		17	17	16	47.6	47.6	44.9	29.126	0	86.281	13596000000	91	0.0534814	0.933597	0.791839	A0A087X1Z3;Q9UL46;H0YM70;H0YLG1;H0YLD2;H0YKU2	A0A087X1Z3;Q9UL46;H0YM70	Proteasome activator complex subunit 2	PSME2
1.00785	1.04443	1.05772	1.03005	1.05765	0.996649	1.01258	1.02759	1.00692	1.00468	1.00826	1.10427	1.03467	1.02427	0.986955	1.01066	0.976741	0.978543	1.01411	1.02103	0.98237	1.00005	1.03137	0.99805	biological regulation;gamete generation;male gamete generation;multicellular organismal process;multicellular organismal reproductive process;positive regulation of biological process;positive regulation of cell proliferation;positive regulation of cellular process;positive regulation of neural precursor cell proliferation;regulation of biological process;regulation of cell proliferation;regulati…		cell part;cytoplasm;integral to membrane;intracellular part;intrinsic to membrane;membrane;membrane part;plasma membrane	Acetylation;Alternativesplicing;Coiledcoil;Completeproteome;Cytoplasm;Membrane;Phosphoprotein;Polymorphism;Proteomicsidentification;Referenceproteome;Transmembrane;Transmembranehelix			18	18	18	18.8	18.8	18.8	102.28	0	22.856	1000900000	38	0.668865	0.596522	0.959375	A0A087X211;Q8TCG1;Q8TCG1-2;F8WF26;F8WAX6	A0A087X211;Q8TCG1;Q8TCG1-2	Protein CIP2A	KIAA1524
0.981788	1.01778	1.09181	1.03523	1.08557	1.10164	1.00983	1.01527	1.00773	0.992057	1.02455	1.13512	1.02399	1.02175	0.992539	1.00606	0.903217	0.972606	0.988674	0.983325	0.977177	0.996855	1.04085	0.996991			cell part;intracellular membrane-bounded organelle;intracellular organelle;intracellular part;membrane-bounded organelle;nucleus;organelle	Acetylation;Alternativesplicing;Completeproteome;Nucleus;Proteomicsidentification;Referenceproteome			10	10	9	15.1	15.1	14.2	94.611	0	27.78	766080000	27	0.457686	0.501054	0.45754	A0A087X239;Q6PCB5;Q6PCB5-2;H7C2D3;C9JM20	A0A087X239;Q6PCB5;Q6PCB5-2	Round spermatid basic protein 1-like protein	RSBN1L
0.981879	1.00624	1.06028	1.01235	1.05518	1.06394	1.0201	1.02318	0.999015	0.987058	0.98895	1.01863	1.04211	1.02706	0.985489	1.00449	1.08607	1.00264	1.01681	1.00622	0.983321	0.985398	1.04051	1.00297	cellular component organization;cellular component organization at cellular level;cellular component organization or biogenesis;cellular component organization or biogenesis at cellular level;cellular process;endosome organization;endosome transport;establishment of localization;establishment of localization in cell;establishment of protein localization;intracellular transport;organelle organizat…		cell part;cytoplasmic part;early endosome;endosome;intracellular membrane-bounded organelle;intracellular organelle;intracellular organelle part;intracellular part;macromolecular complex;membrane-bounded organelle;nuclear part;nucleoplasm;organelle;organelle part;protein complex;WASH complex	Acetylation;Alternativesplicing;Coiledcoil;Completeproteome;Diseasemutation;Endosome;Mentalretardation;Phosphoprotein;Polymorphism;Proteintransport;Proteomicsidentification;Referenceproteome;Transport			9	9	9	8.5	8.5	8.5	136.5	0	38.561	839790000	28	0.0904022	0.448498	0.866074	A0A087X256;Q2M389;Q2M389-2;F8VYH7;F8W1W1	A0A087X256;Q2M389;Q2M389-2	WASH complex subunit 7	KIAA1033
1.01173	1.0528	1.05873	1.02362	1.06313	1.06208	1.00508	1.01455	1.00093	1.00256	1.00006	1.17531	1.02093	1.01248	0.986483	1.00788	0.974829	0.990532	1.0448	1.05891	0.964967	0.982683	1.04911	1.00614	apoptotic mitochondrial changes;biological regulation;cell surface receptor linked signaling pathway;cellular component organization;cellular component organization at cellular level;cellular component organization or biogenesis;cellular component organization or biogenesis at cellular level;cellular process;cellular response to chemical stimulus;cellular response to cytokine stimulus;cellular re…		cell part;cytoplasm;cytoplasmic part;cytosol;endoplasmic reticulum;intracellular membrane-bounded organelle;intracellular organelle;intracellular part;membrane-bounded organelle;organelle	3D-structure;Acetylation;Antiviraldefense;Apoptosis;Completeproteome;Cytoplasm;Endoplasmicreticulum;Immunity;Innateimmunity;Polymorphism;Proteomicsidentification;Referenceproteome;Repeat;RNA-binding;TPRrepeat			9	9	9	20.1	20.1	20.1	55.984	0	14.606	412970000	18	0.194742	0.281624	0.48079	A0A087X279;P09913	A0A087X279;P09913	Interferon-induced protein with tetratricopeptide repeats 2	IFIT2
0.986135	1.01494	0.981862	0.998649	1.08671	1.09786	0.990864	1.00847	0.990445	0.969346	1.00677	0.955176	1.02572	1.00952	1.01452	1.00996	1.02977	1.02952	1.00579	1.0009	0.994697	1.02275	0.899949	0.997041	anatomical structure development;anatomical structure morphogenesis;artery morphogenesis;biological regulation;biosynthetic process;blood vessel morphogenesis;cardiac cell differentiation;cardiac chamber development;cardiac muscle cell differentiation;cardiac ventricle development;cell activation;cell differentiation;cell growth;cell growth involved in cardiac muscle cell development;cellular bio…	actin binding;actin monomer binding;binding;core promoter binding;core promoter sequence-specific DNA binding;cytoskeletal protein binding;DNA binding;leucine zipper domain binding;LRR domain binding;nucleic acid binding;nucleic acid binding transcription factor activity;protein binding;protein binding transcription factor activity;protein domain specific binding;regulatory region DNA binding;reg…	cell part;cytoplasm;cytoplasmic part;cytosol;intracellular membrane-bounded organelle;intracellular organelle;intracellular organelle part;intracellular part;membrane-bounded organelle;nuclear part;nucleoplasm;nucleus;organelle;organelle part	3D-structure;Actin-binding;Activator;Alternativesplicing;Chromosomalrearrangement;Coiledcoil;Completeproteome;Cytoplasm;Nucleus;Phosphoprotein;Polymorphism;Proteomicsidentification;Proto-oncogene;Referenceproteome;Repeat;Transcription;Transcriptionregulation			8	7	6	10.2	9.3	8.3	85.075	0	11.054	805330000	23	0.743862	0.603374	0.917616	E7ER32;A0A087X287;W0Z7M9;Q969V6;B0QY83;A0A087WU73;B0QY84;Q8IZQ8-2;Q8IZQ8;Q8IZQ8-3	E7ER32;A0A087X287;W0Z7M9;Q969V6;B0QY83;A0A087WU73	MKL/myocardin-like protein 1	MKL1;mkl1
0.987585	1.01782	1.06956	1.03015	1.0962	1.10906	1.0092	1.01568	1.00006	0.993706	1.00561	1.12458	1.02094	1.01379	0.994557	1.01024	0.960512	0.994227	0.998522	1.01336	0.969609	0.985521	1.08853	1.0353	activation of immune response;activation of innate immune response;anaphase-promoting complex-dependent proteasomal ubiquitin-dependent protein catabolic process;antigen processing and presentation;antigen processing and presentation of exogenous antigen;antigen processing and presentation of exogenous peptide antigen;antigen processing and presentation of exogenous peptide antigen via MHC class …	adenyl nucleotide binding;adenyl ribonucleotide binding;ATP binding;ATPase activity;binding;binding, bridging;catalytic activity;hydrolase activity;hydrolase activity, acting on acid anhydrides;hydrolase activity, acting on acid anhydrides, in phosphorus-containing anhydrides;nucleoside-triphosphatase activity;nucleotide binding;protein binding;protein binding, bridging;purine nucleotide binding;…	cell part;cytoplasmic part;cytosol;cytosolic part;cytosolic proteasome complex;extracellular membrane-bounded organelle;extracellular organelle;extracellular region part;extracellular vesicular exosome;inclusion body;intracellular membrane-bounded organelle;intracellular organelle;intracellular organelle part;intracellular part;macromolecular complex;membrane;membrane-bounded organelle;membrane-b…	Acetylation;ATP-binding;Completeproteome;Cytoplasm;Directproteinsequencing;Nucleotide-binding;Nucleus;Proteasome;Proteomicsidentification;Referenceproteome	Proteasome		28	28	28	62	62	62	45.796	0	185.05	22471000000	204	0.0835721	0.531807	0.631846	A0A087X2I1;P62333;H0YJC0;H0YJS8;H0YJT1;H0YJE9;H0YJX2;H0YJD2;H0YJY8	A0A087X2I1;P62333;H0YJC0;H0YJS8	26S protease regulatory subunit 10B	PSMC6
0.967934	1.02198	1.12165	1.04665	1.16482	1.14746	1.00742	1.01827	1.00695	1.00139	1.03164	1.14193	1.03013	1.01542	0.987538	1.00963	0.917651	0.964712	1.0162	1.01353	0.981854	1.00064	1.0941	1.05658	biological regulation;blood coagulation;cellular process;cellular response to stimulus;coagulation;hemostasis;intracellular signal transduction;multicellular organismal process;regulation of biological process;regulation of biological quality;regulation of body fluid levels;regulation of cellular process;response to stimulus;signal transduction;small GTPase mediated signal transduction	enzyme regulator activity;GTPase regulator activity;guanyl-nucleotide exchange factor activity;nucleoside-triphosphatase regulator activity;Ras guanyl-nucleotide exchange factor activity;Rho guanyl-nucleotide exchange factor activity;small GTPase regulator activity	cell part;cytoplasmic part;cytosol;endomembrane system;intracellular part;membrane	3D-structure;Alternativesplicing;Coiledcoil;Completeproteome;Guanine-nucleotidereleasingfactor;Membrane;Phosphoprotein;Polymorphism;Proteomicsidentification;Referenceproteome;Repeat			11	11	10	5.5	5.5	5.1	237.75	0	11.862	616420000	22	0.246527	0.788189	0.814664	A0A088AWN3;A0A0A0MSY4;A0A0A0MRA7;Q9BZ29-3;Q9BZ29-5;Q9BZ29;Q9BZ29-4;Q9BZ29-6;H0Y3S1;Q5JUD3;H7BZ79;Q5JUD8;H0YFC5;A0A0A0MT38;A6NIW2;Q5JSL3	A0A088AWN3;A0A0A0MSY4;A0A0A0MRA7;Q9BZ29-3;Q9BZ29-5;Q9BZ29;Q9BZ29-4;Q9BZ29-6	Dedicator of cytokinesis protein 9	DOCK9
0.966391	1.00427	1.05672	1.03076	1.08682	1.10622	1.00059	1.01812	1.00683	0.996516	0.992467	1.10937	1.02202	1.02436	0.97332	1.04067	1.00058	1.06939	1.02348	1.0209	0.976855	1.00258	0.982977	1.02669	biological regulation;cellular component disassembly;cellular component disassembly at cellular level;cellular component organization;cellular component organization at cellular level;cellular component organization or biogenesis;cellular component organization or biogenesis at cellular level;cellular process;collagen catabolic process;collagen metabolic process;defense response;digestion;extrace…	binding;calcium ion binding;catalytic activity;cation binding;endopeptidase activity;hydrolase activity;ion binding;metal ion binding;peptidase activity;peptidase activity, acting on L-amino acid peptides;serine hydrolase activity;serine-type endopeptidase activity;serine-type peptidase activity	extracellular matrix;extracellular region;extracellular region part;extracellular space	Calcium;Completeproteome;Digestion;Directproteinsequencing;Disulfidebond;Hydrolase;Metal-binding;Polymorphism;Protease;Referenceproteome;Secreted;Serineprotease;Signal;Sulfation;Zymogen	Neuroactive ligand-receptor interaction;Pancreatic secretion;Protein digestion and absorption		4	4	3	17.9	17.9	14.2	26.67	0	6.5041	279190000	16	0.0377503	0.0271196	0.093389	A6XMV8;A0A096LNX4;A6XMV9;A0A096LP77;P07478;A0A096LPH0	A6XMV8;A0A096LNX4;A6XMV9;A0A096LP77;P07478;A0A096LPH0	Trypsin-2	PRSS2
0.984653	1.01592	1.07488	1.04821	1.06322	1.0886	0.990702	1.00161	1.00259	0.992638	1.01947	1.11676	1.01751	1.00517	1.00151	1.01933	0.946816	1.01752	1.00309	1.00599	0.98889	1.00742	1.01472	1.04428				Acetylation;Completeproteome;Phosphoprotein;Proteomicsidentification;Referenceproteome			10	10	8	26	26	22.1	54.448	0	50.886	1049600000	34	0.159112	0.171428	0.178981	A0A096LP25;A0A096LNZ0;Q6ZSR9	A0A096LP25;A0A096LNZ0;Q6ZSR9	Uncharacterized protein FLJ45252	AAK1
0.899481	0.929728	0.925286	0.984631	1.07279	1.08025	1.00392	0.99423	0.959407	0.919993	1.04543	0.880581	1.01715	1.01094	1.02513	1.01295	1.07585	1.03402	0.984714	0.911604	1.06989	1.06972	0.822613	0.987403	biological adhesion;cell adhesion;cellular process		adherens junction;anchoring junction;cell junction;cell part;cell-substrate adherens junction;cell-substrate junction;cytoplasm;focal adhesion;integral to membrane;integral to plasma membrane;intracellular part;intrinsic to membrane;intrinsic to plasma membrane;membrane;membrane part;plasma membrane;plasma membrane part	Alternativesplicing;Celladhesion;Completeproteome;Directproteinsequencing;Glycoprotein;Membrane;Polymorphism;Proteomicsidentification;Referenceproteome;Signal;Transmembrane;Transmembranehelix	Cell adhesion molecules (CAMs);Leukocyte transendothelial migration		1	1	1	5.4	5.4	5.4	18.777	0	9.0251	91779000	6	0.691961	0.825501	0.977505	A0A096LP69;P14209-3;P14209	A0A096LP69;P14209-3;P14209	CD99 antigen	CD99
0.970604	1.00431	0.985555	1.01045	1.09772	1.11107	1.00181	1.01524	0.985526	0.961885	0.990561	0.940584	1.03496	1.01459	1.00143	1.00664	1.05657	1.03019	1.02641	1.01916	0.975642	1.00571	0.935641	0.99228	actin cytoskeleton organization;actin filament organization;actin filament-based process;actin nucleation;Arp2/3 complex-mediated actin nucleation;biological regulation;cellular component disassembly;cellular component disassembly at cellular level;cellular component organization;cellular component organization at cellular level;cellular component organization or biogenesis;cellular component org…	alpha-tubulin binding;binding;cytoskeletal protein binding;enzyme binding;protein binding;tubulin binding;ubiquitin protein ligase binding	autophagic vacuole;cell part;cell projection;centriole;cytoplasmic part;cytoplasmic vesicle;cytoskeletal part;early endosome;early endosome membrane;endosomal part;endosome;endosome membrane;filopodium;intracellular membrane-bounded organelle;intracellular non-membrane-bounded organelle;intracellular organelle;intracellular organelle part;intracellular part;invadopodium;lamellipodium;late endosom…	Actin-binding;Cellprojection;Completeproteome;Cytoplasm;Cytoplasmicvesicle;Cytoskeleton;Endosome;Isopeptidebond;Membrane;Proteintransport;Referenceproteome;Transport;Ublconjugation			13	13	13	25.9	25.9	25.9	50.073	0	87.193	2072600000	61	0.408009	0.765669	0.992747	A0A096LP75;C4AMC7;Q6VEQ5;A0A096LP26;A0A096LNU2;Q9NQA3;A8K0Z3;A8MWX3;H3BV49	A0A096LP75;C4AMC7;Q6VEQ5;A0A096LP26;A0A096LNU2;Q9NQA3;A8K0Z3;A8MWX3	Putative WAS protein family homolog 3;WAS protein family homolog 2;WAS protein family homolog 6;WAS protein family homolog 1;Putative WAS protein family homolog 4	WASH3P;WASH2P;WASH6P;WASH1;WASH4P
0.952316	0.98146	0.948293	0.995692	1.06928	1.08627	1.00262	1.01267	0.981799	0.949906	1.01465	0.893184	1.01992	1.00645	1.01234	1.009	1.10204	1.02621	1.01196	0.991939	1.00506	1.02633	0.907743	0.986661	biological regulation;cellular process;endosome transport;establishment of localization;establishment of localization in cell;establishment of protein localization;intracellular transport;negative regulation of barbed-end actin filament capping;negative regulation of biological process;negative regulation of cellular component organization;protein transport;regulation of barbed-end actin filament…	binding;lipid binding;phosphatidylinositol binding;phosphatidylinositol-3,4,5-trisphosphate binding;phosphatidylinositol-3,4-bisphosphate binding;phosphatidylinositol-3,5-bisphosphate binding;phosphatidylinositol-3-phosphate binding;phosphatidylinositol-4,5-bisphosphate binding;phosphatidylinositol-4-phosphate binding;phosphatidylinositol-5-phosphate binding;phospholipid binding	cell part;cytoplasmic part;early endosome;early endosome membrane;endosomal part;endosome;endosome membrane;intracellular membrane-bounded organelle;intracellular organelle;intracellular organelle part;intracellular part;macromolecular complex;membrane;membrane-bounded organelle;organelle;organelle membrane;organelle part;plasma membrane;protein complex;WASH complex	Alternativesplicing;Cellmembrane;Completeproteome;Endosome;Lipid-binding;Membrane;Phosphoprotein;Proteintransport;Proteomicsidentification;Referenceproteome;Transport			40	40	7	35.9	35.9	8.1	147.15	0	253.9	14475000000	196	0.706296	0.854312	0.860859	A0A096LPC5;A0A0A0MR88;J3KP36;Q9Y4E1-2;Q9Y4E1;Q9Y4E1-4;Q9Y4E1-3;Q9Y4E1-6;Q9Y4E1-5;Q5SRD0;B1AP61;A0A0A0MT65;Q5T1D7	A0A096LPC5;A0A0A0MR88;J3KP36;Q9Y4E1-2;Q9Y4E1;Q9Y4E1-4;Q9Y4E1-3;Q9Y4E1-6;Q9Y4E1-5	WASH complex subunit FAM21C	FAM21C
0.950648	0.983425	1.05376	1.00654	1.02875	1.03602	1.0042	1.01059	1.0109	1.00789	1.01881	1.0219	1.02891	1.01073	0.990898	1.01657	0.974741	0.965464	1.03324	0.959755	1.05349	1.06845	0.936687	0.969351			cell part;cytoplasmic part;intracellular membrane-bounded organelle;intracellular organelle;intracellular part;membrane-bounded organelle;mitochondrion;organelle	Acetylation;Alternativesplicing;Completeproteome;Directproteinsequencing;Mitochondrion;Polymorphism;Referenceproteome;Transitpeptide			11	11	11	50.8	50.8	50.8	25.64	0	102.76	5560300000	47	0.194302	0.953078	0.681403	A0A096LPI6;P30042;A0A096LNH5;H7C1F6;P30042-2;H7C2G3;A0A096LP73;F2Z2Q0;H7BYH1;A0A096LP12;A0A096LNJ1	A0A096LPI6;P30042;A0A096LNH5;H7C1F6;P30042-2;H7C2G3;A0A096LP73;F2Z2Q0;H7BYH1;A0A096LP12	ES1 protein homolog, mitochondrial	C21orf33
0.994919	1.02371	1.14884	1.07727	1.11217	1.11745	1.01187	1.00824	1.01187	1.00694	0.997043	1.09362	1.0151	1.01344	0.981472	1.0105	0.913497	0.992833	0.995499	1.0289	0.93873	0.955438	1.09213	1.02585	activation of JUN kinase activity;activation of MAPK activity;activation of MAPKKK activity;activation of protein kinase activity;biological regulation;cellular macromolecule metabolic process;cellular metabolic process;cellular process;cellular protein metabolic process;cellular response to stimulus;intracellular signal transduction;macromolecule metabolic process;macromolecule modification;meta…	adenyl nucleotide binding;adenyl ribonucleotide binding;ATP binding;binding;catalytic activity;kinase activity;MAP kinase kinase kinase kinase activity;molecular transducer activity;nucleotide binding;phosphotransferase activity, alcohol group as acceptor;protein kinase activity;protein serine/threonine kinase activity;purine nucleotide binding;purine ribonucleoside triphosphate binding;purine ri…	cell part;cytoplasm;intracellular part;membrane;plasma membrane	ATP-binding;Completeproteome;Cytoplasm;Kinase;Nucleotide-binding;Phosphoprotein;Polymorphism;Proteomicsidentification;Referenceproteome;Serine/threonine-proteinkinase;Transferase			9	9	9	13	13	13	95.023	0	20.732	530780000	21	0.544026	0.650125	0.772576	A0A0A0MQR1;Q9Y4K4;G3V3V7;G3V4Q4;G3V5C6;G3V4T8	A0A0A0MQR1;Q9Y4K4	Mitogen-activated protein kinase kinase kinase kinase;Mitogen-activated protein kinase kinase kinase kinase 5	MAP4K5
0.957607	0.973727	1.02784	1.00431	1.04028	1.04325	1.011	1.01003	1.00826	0.993672	1.05153	1.01181	1.04388	1.02645	1.00738	1.02305	1.01984	1.0168	1.01711	0.968519	1.02489	1.04082	0.948123	0.985394				Completeproteome;Polymorphism;Proteomicsidentification;Referenceproteome			8	8	8	23.5	23.5	23.5	37.531	0	69.236	2869700000	46	0.460688	0.816224	0.782041	A0A0A0MQR2;Q9BY42;A2A2L5;A2A2L6	A0A0A0MQR2;Q9BY42;A2A2L5	Protein RTF2 homolog	RTFDC1
0.979158	1.00599	0.931996	0.978332	1.03163	1.03233	1.01081	1.02207	0.996966	0.973779	1.03377	0.88421	1.08385	1.05856	1.0433	1.03571	1.12581	1.01472	1.04893	1.03901	1.00982	1.003	0.846689	0.967428	anatomical structure development;biological regulation;biosynthetic process;cellular biosynthetic process;cellular macromolecule biosynthetic process;cellular macromolecule metabolic process;cellular metabolic process;cellular nitrogen compound metabolic process;cellular process;developmental process;lung alveolus development;macromolecule biosynthetic process;macromolecule metabolic process;meta…	binding;chromatin binding;DNA binding;nucleic acid binding	cell part;intracellular membrane-bounded organelle;intracellular organelle;intracellular part;membrane-bounded organelle;nucleus;organelle	3D-structure;Acetylation;Completeproteome;DNA-binding;Nucleus;Phosphoprotein;Polymorphism;Proteomicsidentification;Referenceproteome;Repressor;Transcription;Transcriptionregulation			6	6	6	4.1	4.1	4.1	163.68	0	58.204	374090000	17	0.481647	0.782569	0.848305	A0A0A0MQR4;I3L2J0;Q96RK0;I3L373;I3L135;I3L1Q4	A0A0A0MQR4;I3L2J0;Q96RK0	Protein capicua homolog	CIC
0.983108	0.96187	1.03754	0.996778	1.0628	1.08968	1.05519	1.03299	1.01506	0.987834	1.05453	0.993391	1.05071	1.02447	0.973485	0.977881	1.08889	1.02385	1.0175	0.987209	0.988788	1.01404	1.01757	0.999435		adenyl nucleotide binding;adenyl ribonucleotide binding;ATP binding;binding;catalytic activity;kinase activity;nucleotide binding;phosphotransferase activity, alcohol group as acceptor;protein kinase activity;protein serine/threonine kinase activity;purine nucleotide binding;purine ribonucleoside triphosphate binding;purine ribonucleotide binding;ribonucleotide binding;transferase activity;transf…	cell part;extracellular membrane-bounded organelle;extracellular organelle;extracellular region part;extracellular vesicular exosome;membrane;membrane-bounded organelle;membrane-bounded vesicle;organelle;plasma membrane;vesicle	3D-structure;Alternativesplicing;ATP-binding;Cellmembrane;Completeproteome;Kinase;Membrane;Nucleotide-binding;Phosphoprotein;Polymorphism;Proteomicsidentification;Referenceproteome;Serine/threonine-proteinkinase;Transferase			6	2	2	7.6	3.8	3.8	74.09	0	5.0908	89464000	6	0.0281467	0.139929	0.867196	A0A0A0MST9;A0A0A0MQR8;A0A0A0MSZ1;A0A0A0MT23;J3KNR0;P27448-8;P27448-6;P27448-3;P27448-4;P27448-2;P27448;P27448-7;H0YIY6;A2SY06;H0YKP9	A0A0A0MST9;A0A0A0MQR8;A0A0A0MSZ1;A0A0A0MT23;J3KNR0;P27448-8;P27448-6;P27448-3;P27448-4;P27448-2;P27448;P27448-7;H0YIY6;A2SY06	MAP/microtubule affinity-regulating kinase 3	MARK3
0.98256	1.02899	0.977946	1.01341	1.17565	1.1985	0.996578	1.00865	0.995002	0.965111	1.02008	1.00521	1.01865	1.02502	1.01663	1.00128	0.989825	1.01289	0.986677	0.993502	0.98374	0.993962	0.942078	1.00749	cellular macromolecule metabolic process;cellular metabolic process;cellular nitrogen compound metabolic process;cellular process;macromolecule metabolic process;metabolic process;mRNA metabolic process;mRNA processing;nitrogen compound metabolic process;nucleic acid metabolic process;nucleobase-containing compound metabolic process;primary metabolic process;RNA metabolic process;RNA processing;R…		cell part;intracellular membrane-bounded organelle;intracellular organelle;intracellular part;membrane-bounded organelle;nucleus;organelle	Alternativesplicing;Coiledcoil;Completeproteome;mRNAprocessing;mRNAsplicing;Nucleus;Phosphoprotein;Polymorphism;Proteomicsidentification;Referenceproteome			5	5	5	9.6	9.6	9.6	74.824	0	23.75	618310000	12	0.187472	0.539889	0.799891	F5H0Q6;A0A0A0MQS2;Q8N2M8;Q8N2M8-3;Q8N2M8-4;K7EKC9;K7EP11;K7EM61	F5H0Q6;A0A0A0MQS2;Q8N2M8;Q8N2M8-3;Q8N2M8-4	CLK4-associating serine/arginine rich protein	CLASRP
0.975519	1.00409	1.09411	1.05176	1.05454	1.05955	1.01368	1.02077	1.00213	0.99272	1.03755	1.08849	1.04227	1.01718	0.998544	1.01969	0.878127	0.968491	0.983102	0.983992	0.977838	1.01109	1.05608	1.04028	developmental process;multicellular organismal development;multicellular organismal process		cell part;cytoplasm;intracellular organelle part;intracellular part;nuclear part;nucleoplasm;organelle part	Completeproteome;Cytoplasm;Developmentalprotein;Nucleus;Polymorphism;Proteomicsidentification;Referenceproteome;Repeat;WDrepeat			9	9	9	18.8	18.8	18.8	43.237	0	16.419	1307000000	20	0.811823	0.630603	0.804903	U3KQC1;A0A0A0MQU0;Q9BV38;K7EIR0;K7EML4	U3KQC1;A0A0A0MQU0;Q9BV38;K7EIR0	WD repeat-containing protein 18	WDR18
0.989345	1.0266	1.0666	1.0204	1.09228	1.08867	1.01399	1.01525	0.999475	0.994697	1.01105	1.04314	1.01882	1.01651	0.984524	1.01384	1.01277	0.980799	1.00514	1.00388	0.986126	0.998618	0.988961	0.999171	biosynthetic process;cell differentiation;cellular biosynthetic process;cellular developmental process;cellular macromolecule biosynthetic process;cellular macromolecule metabolic process;cellular metabolic process;cellular nitrogen compound metabolic process;cellular process;developmental process;macromolecule biosynthetic process;macromolecule metabolic process;metabolic process;muscle cell dif…	binding;DNA binding;nucleic acid binding;nucleotide binding	cell part;cytoplasm;intracellular membrane-bounded organelle;intracellular organelle;intracellular organelle part;intracellular part;membrane-bounded organelle;nuclear part;nucleoplasm;nucleus;organelle;organelle part	Alternativesplicing;Completeproteome;DNA-binding;Nucleus;Phosphoprotein;Polymorphism;Proteomicsidentification;Referenceproteome;Repeat;Repressor;RNA-binding;Transcription			11	11	11	20	20	20	61.957	0	25.738	1886500000	57	0.357283	0.753322	0.904993	A0A0A0MQW0;A0A0A0MR39;Q9P2K5-2;Q9P2K5;A0A087WUT0;H0YN19;Q9P2K5-3;H0YKS1;A0A087WWC8;Q9P2K5-4	A0A0A0MQW0;A0A0A0MR39;Q9P2K5-2;Q9P2K5;A0A087WUT0	Myelin expression factor 2	MYEF2
1.00584	1.06661	1.07018	0.990065	1.09393	1.03818	0.995769	0.992837	0.998961	0.991559	0.984504	0.998978	1.03114	1.01117	0.993236	1.01425	0.94974	0.98899	0.982573	1.01407	0.968182	0.969938	0.993493	0.982012	axon guidance;biological regulation;cellular process;cellular response to stimulus;chemotaxis;cytoskeleton-dependent intracellular transport;defense response;establishment of localization;establishment of localization in cell;immune response;immune system process;innate immune response;intracellular transport;locomotion;metabolic process;regulation of anatomical structure morphogenesis;regulation…	actin binding;actin filament binding;actin-dependent ATPase activity;adenyl nucleotide binding;adenyl ribonucleotide binding;ATP binding;ATPase activity;ATPase activity, coupled;binding;catalytic activity;cytoskeletal protein binding;hydrolase activity;hydrolase activity, acting on acid anhydrides;hydrolase activity, acting on acid anhydrides, in phosphorus-containing anhydrides;lipid binding;mic…	cell cortex;cell part;cell projection;cell projection membrane;cell projection part;cytoplasm;cytoplasmic part;cytoskeletal part;cytosol;filopodium membrane;filopodium tip;intracellular non-membrane-bounded organelle;intracellular organelle;intracellular organelle part;intracellular part;lamellipodium;macromolecular complex;membrane;membrane part;myosin complex;non-membrane-bounded organelle;nucl…	3D-structure;Acetylation;Actin-binding;Alternativepromoterusage;Alternativesplicing;ATP-binding;Calmodulin-binding;Cellmembrane;Cellprojection;Coiledcoil;Completeproteome;Cytoplasm;Cytoskeleton;Membrane;Motorprotein;Myosin;Nucleotide-binding;Phosphoprotein;Polymorphism;Proteomicsidentification;Referenceproteome;Repeat;Transport	Fc gamma R-mediated phagocytosis		8	7	7	4.5	4.2	4.2	238.51	0	12.128	441170000	15	0.789228	0.93287	0.674413	A0A0A0MQX1;Q9HD67;E9PEW5;Q9HD67-3;D6RGD1;E9PCN3	A0A0A0MQX1;Q9HD67;E9PEW5;Q9HD67-3	Unconventional myosin-X	MYO10
0.990865	1.02427	1.03654	1.00987	1.07165	1.1023	1.00973	1.01365	1.0061	0.992136	1.03408	1.01639	1.03343	1.02052	1.00329	1.0188	1.02793	0.995768	1.00627	1.00444	0.989879	1.00514	0.948416	0.964991	alternative nuclear mRNA splicing, via spliceosome;anatomical structure development;anatomical structure morphogenesis;appendage morphogenesis;biological regulation;cell differentiation;cellular component assembly;cellular component assembly at cellular level;cellular component organization;cellular component organization at cellular level;cellular component organization or biogenesis;cellular co…	binding;cation binding;double-stranded RNA binding;ion binding;metal ion binding;nucleic acid binding;RNA binding	cell part;centrosome;cytoplasm;cytoplasmic part;cytoskeletal part;intracellular membrane-bounded organelle;intracellular non-membrane-bounded organelle;intracellular organelle;intracellular organelle part;intracellular part;macromolecular complex;membrane-bounded organelle;microtubule organizing center;non-membrane-bounded organelle;nuclear part;nucleoplasm;nucleus;organelle;organelle part;ribonu…	3D-structure;Alternativesplicing;Completeproteome;Cytoplasm;Metal-binding;mRNAprocessing;mRNAsplicing;Nucleus;Proteomicsidentification;Referenceproteome;Repeat;RNA-binding;Zinc;Zinc-finger			15	15	6	37.9	37.9	17.5	37.898	0	53.045	10705000000	91	0.458789	0.694136	0.828886	C9JP00;A0A0A0MQX8;Q9NR56;Q9NR56-7;Q9NR56-6;Q9NR56-2;Q9NR56-5;H7C4T5;Q9NR56-3;Q9NR56-4;Q86VM6;C9JCX1;H7C4Y1;C9J4T8	C9JP00;A0A0A0MQX8;Q9NR56;Q9NR56-7;Q9NR56-6;Q9NR56-2;Q9NR56-5;H7C4T5;Q9NR56-3;Q9NR56-4;Q86VM6	Muscleblind-like protein 1	MBNL1
0.974031	0.997125	0.998138	1.00392	1.04869	1.0526	1.00258	1.0129	0.994759	0.983931	1.01081	0.984126	1.02492	1.01558	1.00525	1.01203	1.0074	1.01455	1.01285	0.99622	1.00626	1.01683	0.931352	0.991507	3'-UTR-mediated mRNA stabilization;biological regulation;cellular macromolecule metabolic process;cellular metabolic process;cellular nitrogen compound metabolic process;cellular process;macromolecule metabolic process;metabolic process;mRNA metabolic process;mRNA processing;mRNA stabilization;negative regulation of biological process;negative regulation of biosynthetic process;negative regulatio…	binding;cation binding;identical protein binding;ion binding;metal ion binding;nucleic acid binding;nucleotide binding;protein binding;protein complex binding;transition metal ion binding;zinc ion binding	cell part;intracellular membrane-bounded organelle;intracellular organelle;intracellular organelle part;intracellular part;membrane-bounded organelle;nuclear part;nucleoplasm;nucleus;organelle;organelle part	3D-structure;Acetylation;Alternativesplicing;Completeproteome;Metal-binding;mRNAprocessing;mRNAsplicing;Nucleus;Phosphoprotein;Polymorphism;Proteomicsidentification;Referenceproteome;Repeat;RNA-binding;Zinc;Zinc-finger			32	32	28	27.2	27.2	25.3	110.36	0	318.37	6407100000	118	0.949616	0.55208	0.825536	A0A0A0MR66;P98175-2;P98175;P98175-4;P98175-3	A0A0A0MR66;P98175-2;P98175;P98175-4;P98175-3	RNA-binding protein 10	RBM10
0.920454	0.950534	1.08059	1.03902	1.08487	1.13193	1.008	1.01334	1.00713	0.972088	1.04482	1.01497	1.08328	1.01244	0.963732	0.99114	0.987768	0.912845	1.00766	0.973559	1.0106	1.03019	1.03865	1.02649	anatomical structure development;anatomical structure formation involved in morphogenesis;anatomical structure morphogenesis;axis specification;biological regulation;cell cycle checkpoint;cell cycle process;cell part morphogenesis;cell projection morphogenesis;cell projection organization;cell proliferation;cell surface receptor linked signaling pathway;cellular component morphogenesis;cellular c…		cell part;centriole;centrosome;cytoplasm;cytoplasmic part;cytoskeletal part;cytosol;intracellular non-membrane-bounded organelle;intracellular organelle;intracellular organelle part;intracellular part;microtubule organizing center;microtubule organizing center part;non-membrane-bounded organelle;organelle;organelle part	Acetylation;Alternativesplicing;Chromosomalrearrangement;Completeproteome;Cytoplasm;Developmentalprotein;Diseasemutation;Mentalretardation;Phosphoprotein;Polymorphism;Primarymicrocephaly;Proteomicsidentification;Proto-oncogene;Referenceproteome			3	3	3	3.2	3.2	3.2	137.83	0	9.8078	83128000	5	0.513013	0.510073	0.973483	A0A0A0MR87;E9PSF2;Q15468;Q15468-2;H0Y702;Q5T0C7	A0A0A0MR87;E9PSF2;Q15468;Q15468-2;H0Y702;Q5T0C7	SCL-interrupting locus protein	STIL
0.949673	0.966999	0.978171	0.985345	1.07232	1.0564	0.995055	1.01414	0.975901	0.96003	1.02706	0.928264	1.0217	1.01445	1.01645	1.01543	1.05728	1.01768	1.03849	0.993606	1.00771	0.998888	0.883223	0.971815	anatomical structure development;B cell activation;B cell differentiation;B cell lineage commitment;biological regulation;biosynthetic process;cell activation;cell development;cell differentiation;cell fate commitment;cellular biosynthetic process;cellular component organization;cellular component organization at cellular level;cellular component organization or biogenesis;cellular component orga…	bHLH transcription factor binding;binding;chromatin binding;core promoter proximal region DNA binding;core promoter proximal region sequence-specific DNA binding;DNA binding;E-box binding;enhancer binding;enzyme binding;identical protein binding;kinase binding;mitogen-activated protein kinase kinase kinase binding;nucleic acid binding;nucleic acid binding transcription factor activity;protein bin…	cell part;chromatin;chromosomal part;cytoplasm;intracellular membrane-bounded organelle;intracellular organelle;intracellular organelle part;intracellular part;macromolecular complex;membrane-bounded organelle;nuclear chromatin;nuclear chromosome part;nuclear nucleosome;nuclear part;nucleoplasm;nucleoplasm part;nucleosome;nucleus;organelle;organelle part;protein complex;protein-DNA complex;transc…	3D-structure;Alternativesplicing;Chromosomalrearrangement;Completeproteome;Differentiation;DNA-binding;Neurogenesis;Nucleus;Phosphoprotein;Polymorphism;Proteomicsidentification;Proto-oncogene;Referenceproteome;Transcription;Transcriptionregulation			5	5	5	8.8	8.8	8.8	62.044	0	21.15	354360000	15	0.860856	0.757643	0.993142	A0A0A0MRB7;X6REB3;P15923-2;P15923;P15923-3;K7ELF3;K7ENI0;K7ENH8	A0A0A0MRB7;X6REB3;P15923-2;P15923;P15923-3;K7ELF3	Transcription factor E2-alpha	TCF3
0.982211	1.00483	1.04107	1.01857	1.06668	1.07239	1.00805	1.01695	0.998201	0.992084	1.0094	1.08712	1.02666	1.02103	0.9964	1.01534	0.999452	0.995193	1.02608	0.997183	1.00795	1.02425	0.990923	1.00982	anatomical structure morphogenesis;cell part morphogenesis;cell projection morphogenesis;cell projection organization;cellular component morphogenesis;cellular component organization;cellular component organization at cellular level;cellular component organization or biogenesis;cellular component organization or biogenesis at cellular level;cellular developmental process;cellular process;cilium m…	binding;cation binding;enzyme activator activity;enzyme regulator activity;GTPase activator activity;GTPase regulator activity;ion binding;lipid binding;metal ion binding;nucleoside-triphosphatase regulator activity;phosphatidylinositol binding;phosphatidylinositol-3,4,5-trisphosphate binding;phosphatidylinositol-4,5-bisphosphate binding;phospholipid binding;transition metal ion binding;zinc ion …	cell part;cytoplasmic part;cytosol;intracellular part;membrane	3D-structure;Alternativesplicing;ANKrepeat;Ciliumbiogenesis/degradation;Completeproteome;Cytoplasm;GTPaseactivation;Membrane;Metal-binding;Phosphoprotein;Polymorphism;Proteomicsidentification;Referenceproteome;Repeat;SH3domain;Zinc;Zinc-finger	Endocytosis;Fc gamma R-mediated phagocytosis		15	15	13	16.4	16.4	14.7	124.77	0	37.99	839480000	37	0.258483	0.402182	0.378733	A0A0A0MRE5;Q9ULH1;Q9ULH1-2;H0YBF7;H0YBM4;H0YBY9;E5RHD7	A0A0A0MRE5;Q9ULH1;Q9ULH1-2;H0YBF7	Arf-GAP with SH3 domain, ANK repeat and PH domain-containing protein 1	ASAP1
1.00137	1.0571	1.10269	0.995408	1.12861	1.08924	1.00856	1.02404	0.984969	0.997555	0.975079	1.09019	1.02757	1.02183	0.977036	1.0224	1.01029	1.00212	1.0478	1.09915	0.887317	0.973955	1.14157	1.02947	developmental process;multicellular organismal development;multicellular organismal process		cell part;cytoplasm;cytoskeletal part;intracellular organelle part;intracellular part;macromolecular complex;microtubule;organelle part;protein complex	Alternativesplicing;Completeproteome;Cytoplasm;Cytoskeleton;Developmentalprotein;Microtubule;Phosphoprotein;Proteomicsidentification;Referenceproteome;Repeat;WDrepeat			1	1	1	1.5	1.5	1.5	98.701	0	3.8481	48151000	9	0.0854404	0.696383	0.852187	A0A0A0MRE6;O94967-2;O94967;O94967-3;O94967-4	A0A0A0MRE6;O94967-2;O94967;O94967-3;O94967-4	WD repeat-containing protein 47	WDR47
0.979715	1.00599	0.985667	1.0016	1.05636	1.05926	1.00376	1.01503	0.992	0.979198	1.00572	0.967476	1.02152	1.01376	0.998716	1.00963	1.00346	1.01771	1.01364	1.00053	1.00425	1.01846	0.935687	0.996562	anatomical structure development;biological regulation;cell communication;cell cycle;cell cycle process;cell development;cell-cell signaling;cellular chemical homeostasis;cellular component organization;cellular component organization at cellular level;cellular component organization or biogenesis;cellular component organization or biogenesis at cellular level;cellular developmental process;cellu…	binding;catalytic activity;channel regulator activity;ion channel binding;kinase activity;potassium channel regulator activity;protein binding;protein complex scaffold;receptor binding;structural molecule activity;transferase activity;transferase activity, transferring phosphorus-containing groups	cation channel complex;cell part;centrosome;cytoplasmic part;cytoskeletal part;cytoskeleton;cytosol;Golgi apparatus;intracellular membrane-bounded organelle;intracellular non-membrane-bounded organelle;intracellular organelle;intracellular organelle part;intracellular part;ion channel complex;macromolecular complex;membrane part;membrane-bounded organelle;microtubule organizing center;microtubule…	Alternativesplicing;Coiledcoil;Completeproteome;Cytoplasm;Cytoskeleton;Diseasemutation;Golgiapparatus;Kinase;LongQTsyndrome;Phosphoprotein;Polymorphism;Proteomicsidentification;Referenceproteome;Transferase			63	63	63	15.9	15.9	15.9	453.49	0	120.52	4450600000	161	0.817509	0.508639	0.937251	A0A0A0MRF6;Q99996-5;Q99996-2;Q99996;Q99996-3;Q99996-6;A0A0A0MRE9;A0A087WX84;Q99996-4;H7BYL6;Q6PJH3	A0A0A0MRF6;Q99996-5;Q99996-2;Q99996;Q99996-3;Q99996-6;A0A0A0MRE9	A-kinase anchor protein 9	AKAP9
1.00425	1.02532	0.969794	0.994587	1.06651	1.06845	0.999614	1.0013	0.980027	0.949586	1.01363	0.812546	1.01124	1.00368	1.00381	1.00725	1.05677	1.01691	1.00693	1.00552	0.989411	0.995627	0.939223	0.993455				Acetylation;Alternativesplicing;Completeproteome;Phosphoprotein;Proteomicsidentification;Referenceproteome			13	13	12	29.3	29.3	28.7	37.971	0	71.496	1345600000	53	0.744003	0.535623	0.545064	A0A0A0MRI1;Q8IXQ4;Q8IXQ4-2;Q8IXQ4-3;Q8IXQ4-4;A0A087WW86	A0A0A0MRI1;Q8IXQ4;Q8IXQ4-2;Q8IXQ4-3	GPALPP motifs-containing protein 1	GPALPP1
0.987004	1.01659	1.07704	1.03454	1.09318	1.09177	1.00704	1.01492	0.994768	0.99527	1.02456	1.20522	1.02212	1.00722	0.993246	1.01436	0.955285	0.995798	1.0163	1.01218	0.977642	0.989587	1.07718	1.03802	actin cytoskeleton organization;actin cytoskeleton reorganization;actin filament-based process;actomyosin structure organization;biological regulation;cell migration;cell motility;cellular component movement;cellular component organization;cellular component organization at cellular level;cellular component organization or biogenesis;cellular component organization or biogenesis at cellular level…	adenyl nucleotide binding;adenyl ribonucleotide binding;ATP binding;binding;catalytic activity;cation binding;identical protein binding;ion binding;kinase activity;magnesium ion binding;metal ion binding;nucleotide binding;phosphotransferase activity, alcohol group as acceptor;protein binding;protein kinase activity;protein serine/threonine kinase activity;purine nucleotide binding;purine ribonuc…	actomyosin;cell junction;cell leading edge;cell part;cell-cell junction;cytoplasm;cytoskeletal part;extracellular membrane-bounded organelle;extracellular organelle;extracellular region part;extracellular vesicular exosome;intracellular organelle part;intracellular part;membrane-bounded organelle;membrane-bounded vesicle;organelle;organelle part;vesicle	Alternativesplicing;ATP-binding;Coiledcoil;Completeproteome;Cytoplasm;Kinase;Magnesium;Metal-binding;Nucleotide-binding;Phosphoprotein;Polymorphism;Proteomicsidentification;Referenceproteome;Serine/threonine-proteinkinase;Transferase;Zinc;Zinc-finger			28	23	23	16.4	14.2	14.2	193.63	0	59.333	1757800000	42	0.0873033	0.462359	0.435914	A0A0A0MRJ0;Q5VT25-4;Q5VT25-5;Q5VT25;Q5VT25-2;Q5VT25-6;Q5VT25-3;H0Y5V1;A0A0A0MRJ1;H0Y7V8;H0Y6V3;H0Y6R0	A0A0A0MRJ0;Q5VT25-4;Q5VT25-5;Q5VT25;Q5VT25-2;Q5VT25-6;Q5VT25-3;H0Y5V1;A0A0A0MRJ1	Non-specific serine/threonine protein kinase;Serine/threonine-protein kinase MRCK alpha	CDC42BPA
0.992463	1.01872	1.04587	1.02823	1.09418	1.09438	1.00879	1.02135	1.00171	0.99445	0.993234	1.05661	1.01735	1.01068	0.987875	1.01119	0.976397	0.998807	1.01646	1.0119	0.971831	0.995787	1.06311	1.02442	amine metabolic process;carboxylic acid metabolic process;cellular amine metabolic process;cellular amino acid metabolic process;cellular ketone metabolic process;cellular macromolecule metabolic process;cellular metabolic process;cellular modified amino acid metabolic process;cellular nitrogen compound metabolic process;cellular process;cellular protein metabolic process;coenzyme metabolic proce…	carboxyl-O-methyltransferase activity;catalytic activity;methyltransferase activity;O-methyltransferase activity;protein carboxyl O-methyltransferase activity;protein methyltransferase activity;protein-L-isoaspartate (D-aspartate) O-methyltransferase activity;S-adenosylmethionine-dependent methyltransferase activity;transferase activity;transferase activity, transferring one-carbon groups	cell part;cytoplasm;cytoplasmic part;endoplasmic reticulum;extracellular membrane-bounded organelle;extracellular organelle;extracellular region part;extracellular vesicular exosome;intracellular membrane-bounded organelle;intracellular organelle;intracellular part;membrane-bounded organelle;membrane-bounded vesicle;organelle;vesicle	3D-structure;Acetylation;Alternativesplicing;Completeproteome;Cytoplasm;Directproteinsequencing;Disulfidebond;Methyltransferase;Polymorphism;Proteomicsidentification;Referenceproteome;S-adenosyl-L-methionine;Transferase			15	15	15	49.8	49.8	49.8	30.315	0	84.518	14213000000	131	0.13125	0.571815	0.913467	A0A0A0MRJ6;H7BY58;P22061;P22061-2;F6S8N6;F8WDT3;F8WAV5;F8WAX2;C9J0F2;H7C4X2	A0A0A0MRJ6;H7BY58;P22061;P22061-2;F6S8N6	Protein-L-isoaspartate O-methyltransferase;Protein-L-isoaspartate(D-aspartate) O-methyltransferase	PCMT1
0.967172	0.984065	1.07036	1.02039	1.05285	1.06824	1.01358	1.01403	0.999031	0.993026	1.00976	1.08161	1.02587	1.01998	0.994167	1.01498	1.00244	0.990514	1.01252	0.972197	1.00487	1.01826	0.999423	1.01128	cellular macromolecule metabolic process;cellular metabolic process;cellular process;cellular protein metabolic process;establishment of localization;establishment of localization in cell;establishment of protein localization;establishment of protein localization in mitochondrion;establishment of protein localization to organelle;intracellular protein transport;intracellular transport;macromolecu…		cell part;cytoplasmic part;integral to membrane;intracellular organelle part;intracellular part;intrinsic to membrane;membrane;membrane part;mitochondrial inner membrane;mitochondrial membrane;mitochondrial outer membrane;mitochondrial part;organelle inner membrane;organelle membrane;organelle outer membrane;organelle part;outer membrane	Alternativesplicing;Completeproteome;Isopeptidebond;Membrane;Mitochondrion;Mitochondrionoutermembrane;Polymorphism;Proteintransport;Proteomicsidentification;Referenceproteome;Transmembrane;Transmembranehelix;Transport;Ublconjugation			8	8	8	21.7	21.7	21.7	51.462	0	28.48	1740000000	43	0.209941	0.781556	0.4013	A0A0A0MRK6;Q13505-3;Q13505;Q13505-2	A0A0A0MRK6;Q13505-3;Q13505;Q13505-2	Metaxin-1	MTX1
0.988038	1.01838	1.05483	0.991587	1.07304	1.07858	1.01136	1.0127	1.00531	1.00202	1.01604	1.06887	1.02159	1.01397	0.992085	1.01116	0.966866	0.993174	1.01363	1.00998	0.987566	1.00618	1.0414	1.00108	actin filament-based movement;actin filament-based process;anatomical structure development;anatomical structure morphogenesis;auditory receptor cell differentiation;behavior;biological regulation;cell communication;cell differentiation;cell projection organization;cell-cell signaling;cellular component assembly;cellular component assembly at cellular level;cellular component movement;cellular co…	actin binding;actin filament binding;adenyl nucleotide binding;adenyl ribonucleotide binding;ADP binding;ATP binding;binding;calmodulin binding;catalytic activity;cytoskeletal protein binding;hydrolase activity;hydrolase activity, acting on acid anhydrides;hydrolase activity, acting on acid anhydrides, in phosphorus-containing anhydrides;microfilament motor activity;minus-end directed microfilame…	apical part of cell;axon;cell body;cell cortex;cell part;cell projection;cell projection membrane;cell projection part;clathrin coated vesicle membrane;coated pit;coated vesicle membrane;cytoplasm;cytoplasmic membrane-bounded vesicle;cytoplasmic part;cytoplasmic vesicle;cytoplasmic vesicle membrane;cytoplasmic vesicle part;cytoskeletal part;cytosol;DNA-directed RNA polymerase II, holoenzyme;endoc…	Actin-binding;Alternativesplicing;ATP-binding;Calmodulin-binding;Cellmembrane;Cellprojection;Coatedpit;Coiledcoil;Completeproteome;Cytoplasm;Cytoplasmicvesicle;Deafness;Diseasemutation;Endocytosis;Golgiapparatus;Hearing;Membrane;Motorprotein;Myosin;Non-syndromicdeafness;Nucleotide-binding;Nucleus;Phosphoprotein;Proteintransport;Proteomicsidentification;Referenceproteome;Transport			48	48	48	34.7	34.7	34.7	145.01	0	314.95	11259000000	207	0.177081	0.714965	0.614282	A0A0A0MRM8;Q9UM54-5;Q9UM54-2;Q9UM54-6;E7EW20;Q9UM54-4;Q9UM54-1;Q9UM54;Q5JVM0	A0A0A0MRM8;Q9UM54-5;Q9UM54-2;Q9UM54-6;E7EW20;Q9UM54-4;Q9UM54-1;Q9UM54	Unconventional myosin-VI	MYO6
0.952154	1.00295	1.11552	1.06998	1.16726	1.11885	1.03306	1.04895	1.03045	1.02468	0.922752	1.31322	1.01851	1.01765	0.997805	1.0049	0.875838	1.00741	1.0326	1.06335	0.959489	0.978294	1.23089	1.16911	anatomical structure development;ATP-dependent chromatin remodeling;biological regulation;biosynthetic process;brain development;cell differentiation;cellular biosynthetic process;cellular component organization;cellular component organization at cellular level;cellular component organization or biogenesis;cellular component organization or biogenesis at cellular level;cellular developmental proc…	adenyl nucleotide binding;adenyl ribonucleotide binding;ATP binding;ATPase activity;binding;catalytic activity;chromatin binding;DNA binding;helicase activity;hydrolase activity;hydrolase activity, acting on acid anhydrides;hydrolase activity, acting on acid anhydrides, in phosphorus-containing anhydrides;nucleic acid binding;nucleoside-triphosphatase activity;nucleotide binding;purine nucleotide…	cell part;chromatin;chromatin remodeling complex;chromosomal part;intracellular membrane-bounded organelle;intracellular organelle;intracellular organelle part;intracellular part;ISWI complex;macromolecular complex;membrane-bounded organelle;nuclear chromatin;nuclear chromosome part;nuclear part;nucleus;NURF complex;organelle;organelle part;protein complex	Activator;Alternativesplicing;ATP-binding;Chromatinregulator;Completeproteome;Helicase;Hydrolase;Nucleotide-binding;Nucleus;Phosphoprotein;Polymorphism;Proteomicsidentification;Referenceproteome;Repeat;Transcription;Transcriptionregulation			21	6	6	18.4	6	6	122.86	0	11.131	287460000	11	0.327883	0.460611	0.594338	A0A0A0MRP6;B7ZLQ5;P28370-2;P28370	A0A0A0MRP6;B7ZLQ5;P28370-2;P28370	Probable global transcription activator SNF2L1	SMARCA1
0.950716	0.983503	0.994198	0.981853	1.01405	1.12537	1.02811	1.00423	0.991403	0.975337	0.950178	0.906084	1.05085	1.02802	1.05163	1.05229	0.983239	1.04385	1.07915	0.972018	1.04599	1.08994	0.898126	1.2171	biological regulation;cell cycle;cell division;cellular process;establishment of localization;establishment of protein localization;protein transport;regulation of biological process;regulation of cell division;regulation of cellular process;regulation of cytokinesis;transport		cell part;cytoplasmic part;early endosome;endosome;intracellular membrane-bounded organelle;intracellular organelle;intracellular part;membrane-bounded organelle;midbody;organelle;recycling endosome	Alternativesplicing;Cellcycle;Celldivision;Coiledcoil;Completeproteome;Cytoplasm;Endosome;Phosphoprotein;Polymorphism;Proteintransport;Proteomicsidentification;Referenceproteome;Transport			1	1	1	4	4	4	24.048	0.0038416	1.6969	94158000	4	0.515264	0.631369	0.305723	A0A0A0MRP9;Q96C92-4;Q96C92-2;Q96C92	A0A0A0MRP9;Q96C92-4;Q96C92-2;Q96C92	Serologically defined colon cancer antigen 3	SDCCAG3
1.00546	1.03505	0.96687	0.995454	1.13011	1.15677	0.995311	1.02028	0.993991	0.972797	0.989053	0.953759	1.02514	1.0183	1.00344	1.0041	1.03133	1.02591	1.02346	1.0458	0.971623	0.992853	0.941441	0.981824	cellular component assembly;cellular component assembly at cellular level;cellular component organization;cellular component organization at cellular level;cellular component organization or biogenesis;cellular component organization or biogenesis at cellular level;cellular macromolecular complex assembly;cellular macromolecular complex subunit organization;cellular macromolecule metabolic proces…	binding;cation binding;identical protein binding;ion binding;metal ion binding;mRNA binding;nucleic acid binding;protein binding;protein dimerization activity;protein homodimerization activity;RNA binding;single-stranded RNA binding;snRNA binding;transition metal ion binding;U1 snRNA binding;zinc ion binding	Cajal body;cell part;commitment complex;intracellular organelle part;intracellular part;macromolecular complex;nuclear body;nuclear part;nucleoplasm;nucleoplasm part;organelle part;prespliceosome;ribonucleoprotein complex;small nuclear ribonucleoprotein complex;spliceosomal complex;U1 snRNP;U2-type prespliceosome;U2-type spliceosomal complex	3D-structure;Acetylation;Completeproteome;Metal-binding;Nucleus;Phosphoprotein;Proteomicsidentification;Referenceproteome;Ribonucleoprotein;RNA-binding;Zinc;Zinc-finger	Spliceosome		3	3	3	21.7	21.7	21.7	19.687	0	16.171	6941100000	74	0.221458	0.524377	0.952306	A0A0A0MRR7;P09234;Q5TAL2	A0A0A0MRR7;P09234	U1 small nuclear ribonucleoprotein C	SNRPC
0.978782	1.00917	1.02848	1.00947	1.12116	1.16649	1.00953	1.02332	0.997886	0.98665	1.00926	1.0227	1.017	1.01065	0.994564	1.0115	0.97625	1.00644	1.01335	0.996787	0.992963	1.00886	0.966345	1.00396	actin cytoskeleton organization;actin filament organization;actin filament-based process;actin polymerization or depolymerization;anatomical structure development;anatomical structure formation involved in morphogenesis;anatomical structure morphogenesis;anterior/posterior pattern specification;biological regulation;cell development;cell part morphogenesis;cell projection morphogenesis;cell proje…	binding;cytoskeletal protein binding;enzyme activator activity;enzyme regulator activity;kinase activator activity;kinase regulator activity;protein binding;protein complex binding;protein kinase activator activity;protein kinase regulator activity;protein tyrosine kinase activator activity	cell junction;cell part;cell projection;cell projection part;cytoplasm;cytoplasmic part;cytoskeletal part;cytoskeleton;cytosol;endoplasmic reticulum;extracellular membrane-bounded organelle;extracellular organelle;extracellular region part;extracellular vesicular exosome;filopodium;growth cone;intracellular;intracellular membrane-bounded organelle;intracellular non-membrane-bounded organelle;intr…	Acetylation;Alternativesplicing;Celljunction;Cellmembrane;Cellprojection;Chromosomalrearrangement;Coiledcoil;Completeproteome;Cytoplasm;Cytoskeleton;Directproteinsequencing;Host-virusinteraction;Membrane;Nucleus;Phosphoprotein;Polymorphism;Postsynapticcellmembrane;Proteomicsidentification;Referenceproteome;SH3domain;Synapse			11	11	9	28.5	28.5	23.9	43.294	0	41.612	2970600000	51	0.28414	0.454524	0.556082	B6VEX4;A0A0A0MRT6;Q8IZP0-10;Q8IZP0-8;Q8IZP0-7;Q8IZP0-2;Q8IZP0-4;Q8IZP0-3;Q8IZP0-5;Q8IZP0-6;Q8IZP0-9;Q8IZP0;Q8IZP0-11;Q8IZP0-12	B6VEX4;A0A0A0MRT6;Q8IZP0-10;Q8IZP0-8;Q8IZP0-7;Q8IZP0-2;Q8IZP0-4;Q8IZP0-3;Q8IZP0-5;Q8IZP0-6;Q8IZP0-9;Q8IZP0;Q8IZP0-11;Q8IZP0-12	Abl interactor 1	ABI1
0.981148	0.999583	0.967769	0.993449	1.01723	1.0145	1.01146	1.01326	0.9836	0.967766	1.00987	0.929046	1.02221	1.01177	1.01254	1.01068	1.07123	1.02016	1.00855	1.00789	1.00033	1.00997	0.916124	0.977113	biosynthetic process;cell differentiation;cellular biosynthetic process;cellular developmental process;cellular macromolecule biosynthetic process;cellular macromolecule metabolic process;cellular metabolic process;cellular process;cellular protein metabolic process;developmental process;establishment of localization;establishment of protein localization;macromolecule biosynthetic process;macromo…	receptor activity	cell part;cytoplasmic part;endoplasmic reticulum;endoplasmic reticulum part;integral to endoplasmic reticulum membrane;integral to membrane;integral to organelle membrane;intracellular membrane-bounded organelle;intracellular non-membrane-bounded organelle;intracellular organelle;intracellular organelle part;intracellular part;intrinsic to endoplasmic reticulum membrane;intrinsic to membrane;intr…	Acetylation;Alternativesplicing;Completeproteome;Endoplasmicreticulum;Membrane;Phosphoprotein;Polymorphism;Proteintransport;Proteomicsidentification;Referenceproteome;Repeat;Translocation;Transmembrane;Transmembranehelix;Transport	Protein processing in endoplasmic reticulum		127	127	2	78.7	78.7	1.3	152.45	0	323.31	373090000000	1394	0.727036	0.884545	0.838515	A0A0A0MRV0;Q9P2E9;A0A087WVV2;F8W7S5;A0A087WU26;A2A2S5;V9GY78	A0A0A0MRV0;Q9P2E9;A0A087WVV2;F8W7S5	Ribosome-binding protein 1	RRBP1
0.993174	1.01384	0.970587	0.98927	1.10424	1.14436	1.00131	1.01578	0.992503	0.970715	1.01045	0.999185	1.04125	1.03139	1.00408	1.0215	1.05596	1.03411	1.01416	1.02915	0.97591	0.995947	0.941318	0.991498	activation of immune response;activation of innate immune response;biological adhesion;biological regulation;biosynthetic process;cell adhesion;cell-cell adhesion;cellular biosynthetic process;cellular macromolecule biosynthetic process;cellular macromolecule metabolic process;cellular metabolic process;cellular process;cellular protein metabolic process;cellular response to stimulus;defense resp…	binding;enzyme binding;kinase binding;mitogen-activated protein kinase binding;protein binding;protein kinase binding	cell part;cytoplasm;intracellular;intracellular membrane-bounded organelle;intracellular organelle;intracellular part;membrane-bounded organelle;nucleus;organelle	Alternativesplicing;Coiledcoil;Completeproteome;Cytoplasm;Inflammatoryresponse;Nucleus;Phosphoprotein;Polymorphism;Proteomicsidentification;Referenceproteome			10	10	10	17.4	17.4	17.4	70.074	0	25.57	1384600000	36	0.0856188	0.446563	0.839403	A0A0A0MRZ4;Q15025-7;Q15025-8;Q15025-5;Q15025-6;Q15025-4;Q15025-2;Q15025;E7EMV7;Q15025-3;H0YC17;E7EW15;E7EWG2;E7EW68	A0A0A0MRZ4;Q15025-7;Q15025-8;Q15025-5;Q15025-6;Q15025-4;Q15025-2;Q15025;E7EMV7;Q15025-3	TNFAIP3-interacting protein 1	TNIP1
0.978495	1.01247	1.06877	1.02233	1.06169	1.06561	1.00992	1.01223	0.998478	0.99443	0.990476	1.13509	1.01902	1.01747	0.983555	1.00265	0.964583	0.992412	1.01288	1.02073	0.974152	0.993564	1.05887	1.01492	biological regulation;cation homeostasis;chemical homeostasis;homeostatic process;ion homeostasis;iron ion homeostasis;regulation of biological quality	ion transmembrane transporter activity;substrate-specific transmembrane transporter activity;substrate-specific transporter activity;transmembrane transporter activity;transporter activity	cell part;cytoplasmic part;integral to membrane;intracellular membrane-bounded organelle;intracellular organelle;intracellular organelle part;intracellular part;intrinsic to membrane;membrane;membrane part;membrane-bounded organelle;mitochondrial membrane;mitochondrial part;mitochondrion;organelle;organelle membrane;organelle part	Completeproteome;Iontransport;Iron;Irontransport;Membrane;Mitochondrion;Proteomicsidentification;Referenceproteome;Transmembrane;Transmembranehelix;Transport			15	15	15	46.1	46.1	46.1	35.503	0	85.677	5629500000	80	0.220972	0.376491	0.466804	A0A0A0MS41;Q9BWM7;S4R3N9	A0A0A0MS41;Q9BWM7;S4R3N9	Sideroflexin;Sideroflexin-3	SFXN3
0.97725	1.04427	1.08787	0.995806	1.10379	1.07584	0.980988	1.01372	1.01234	0.983501	1.00454	1.12414	1.0298	1.02039	0.987256	1.0197	0.936485	0.952425	1.00365	1.02167	0.942282	0.991461	1.03114	0.980702	anatomical structure development;biological regulation;calcium ion transport;cation transport;cell communication;cell cycle process;cell differentiation;cell surface receptor linked signaling pathway;cell-cell signaling;cellular component assembly;cellular component organization;cellular component organization or biogenesis;cellular developmental process;cellular macromolecule metabolic process;c…	adenyl nucleotide binding;adenyl ribonucleotide binding;ATP binding;binding;calcium-dependent protein serine/threonine phosphatase activity;calmodulin binding;calmodulin-dependent protein kinase activity;catalytic activity;hydrolase activity;hydrolase activity, acting on ester bonds;identical protein binding;kinase activity;nucleotide binding;phosphatase activity;phosphoprotein phosphatase activi…	cell part;cytoplasmic part;cytoplasmic vesicle membrane;cytoplasmic vesicle part;cytosol;endocytic vesicle membrane;endoplasmic reticulum membrane;endoplasmic reticulum part;intracellular organelle part;intracellular part;membrane;membrane part;nuclear part;nucleoplasm;organelle membrane;organelle part;plasma membrane;sarcoplasmic reticulum membrane;vesicle membrane	3D-structure;Alternativesplicing;ATP-binding;Calmodulin-binding;Completeproteome;Developmentalprotein;Differentiation;Kinase;Membrane;Neurogenesis;Nucleotide-binding;Phosphoprotein;Polymorphism;Proteomicsidentification;Referenceproteome;Sarcoplasmicreticulum;Serine/threonine-proteinkinase;Transferase	Calcium signaling pathway;ErbB signaling pathway;Gastric acid secretion;Glioma;GnRH signaling pathway;ko05152;Long-term potentiation;Melanogenesis;Neurotrophin signaling pathway;Olfactory transduction;Oocyte meiosis;Phototransduction - fly;Wnt signaling pathway		8	4	4	16.9	7.8	7.8	57.796	0	8.7422	212640000	8	0.521631	0.520476	0.683163	Q5SWX3;A0A0A0MS52;A0A0A0MT11;Q13555-10;Q13555-3;Q13555-5;Q13555-4;Q13555-7;Q13555-9;Q13555-2;Q13555-8;Q13555;Q13555-6;Q8WU40;H0Y6G2;H7BXS4;E9PBE8;E7EQE4;D6RHX9;D6RFJ0;E7ERS6;E7ETC9	Q5SWX3;A0A0A0MS52;A0A0A0MT11;Q13555-10;Q13555-3;Q13555-5;Q13555-4;Q13555-7;Q13555-9;Q13555-2;Q13555-8;Q13555;Q13555-6;Q8WU40;H0Y6G2;H7BXS4	Calcium/calmodulin-dependent protein kinase type II subunit gamma	CAMK2G;CAMK2B
0.992711	1.02733	1.04583	1.01606	1.05514	1.07283	1.01137	1.00933	0.986204	0.977204	1.02198	0.870089	1.04041	1.02346	1.00195	1.01609	0.973534	1.00465	1.01344	1.01585	0.983565	0.996629	0.997387	1.00886	biological regulation;biosynthetic process;cellular biosynthetic process;cellular component organization;cellular component organization at cellular level;cellular component organization or biogenesis;cellular component organization or biogenesis at cellular level;cellular macromolecule biosynthetic process;cellular macromolecule metabolic process;cellular metabolic process;cellular nitrogen comp…	acetyltransferase activity;adenyl nucleotide binding;adenyl ribonucleotide binding;ATP binding;binding;catalytic activity;DNA binding;helicase activity;histone acetyltransferase activity;hydrolase activity;hydrolase activity, acting on acid anhydrides;hydrolase activity, acting on acid anhydrides, in phosphorus-containing anhydrides;lysine N-acetyltransferase activity;N-acetyltransferase activity…	cell part;cytoplasmic part;Golgi apparatus;intracellular membrane-bounded organelle;intracellular organelle;intracellular organelle part;intracellular part;macromolecular complex;membrane-bounded organelle;nuclear part;nucleoplasm;nucleus;organelle;organelle part;perinuclear region of cytoplasm;protein complex	Activator;Alternativesplicing;ATP-binding;Chromatinregulator;Completeproteome;DNA-binding;Helicase;Host-virusinteraction;Hydrolase;Nucleotide-binding;Nucleus;Phosphoprotein;Proteomicsidentification;Referenceproteome;Repeat;Transcription;Transcriptionregulation			16	16	16	6	6	6	315.61	0	26.313	30777000000	40	0.696826	0.668803	0.722903	A0A0A0MS59;Q6ZRS2-3;Q6ZRS2-2;Q6ZRS2;A0A087X0E3	A0A0A0MS59;Q6ZRS2-3;Q6ZRS2-2;Q6ZRS2;A0A087X0E3	Helicase SRCAP	SRCAP
0.966247	0.991774	1.01724	1.00393	1.00944	0.990287	1.01897	1.01768	0.993769	0.99917	1.12126	1.04298	1.04093	1.02416	1.01475	1.02242	0.977956	1.00293	1.00053	0.969542	1.01994	1.03187	0.986049	1.02729	biological regulation;biosynthetic process;cellular biosynthetic process;cellular macromolecule biosynthetic process;cellular macromolecule metabolic process;cellular metabolic process;cellular nitrogen compound metabolic process;cellular process;macromolecule biosynthetic process;macromolecule metabolic process;metabolic process;negative regulation of biological process;negative regulation of bi…	binding;cation binding;DNA binding;ion binding;metal ion binding;methyl-CpG binding;nucleic acid binding;nucleic acid binding transcription factor activity;nucleotide binding;protein binding transcription factor activity;sequence-specific DNA binding;sequence-specific DNA binding transcription factor activity;transcription cofactor activity;transcription corepressor activity;transcription factor …	cell part;chromatin;chromosomal part;cytoplasm;heterochromatin;intracellular membrane-bounded organelle;intracellular organelle;intracellular organelle part;intracellular part;membrane-bounded organelle;nuclear body;nuclear matrix;nuclear part;nuclear speck;nucleoplasm part;nucleus;organelle;organelle part	3D-structure;Alternativesplicing;Chromosome;Completeproteome;DNA-binding;Isopeptidebond;Metal-binding;Nucleus;Phosphoprotein;Polymorphism;Proteomicsidentification;Referenceproteome;Repeat;Transcription;Transcriptionregulation;Ublconjugation;Zinc;Zinc-finger			4	4	4	10.2	10.2	10.2	62.4	0	15.92	362790000	10	0.70795	0.729562	0.920505	A0A0A0MS90;Q9UIS9-7;Q9UIS9-5;Q9UIS9-10;Q9UIS9;Q9UIS9-9;Q9UIS9-12;Q9UIS9-4;Q9UIS9-11;Q9UIS9-8;Q9UIS9-6;Q9UIS9-2;K7EN65;K7EPZ6;K7EMA9	A0A0A0MS90;Q9UIS9-7;Q9UIS9-5;Q9UIS9-10;Q9UIS9;Q9UIS9-9;Q9UIS9-12;Q9UIS9-4;Q9UIS9-11;Q9UIS9-8;Q9UIS9-6;Q9UIS9-2;K7EN65;K7EPZ6	Methyl-CpG-binding domain protein 1	MBD1
0.999958	1.03482	1.03775	1.02083	1.06056	1.07352	1.00691	1.01354	1.00198	0.989877	1.01207	1.0777	1.02577	1.01671	0.991782	1.00968	0.965023	0.997394	1.00569	1.00781	0.983671	1.0032	1.00667	0.995913	biological regulation;cell surface receptor linked signaling pathway;cellular process;cellular response to chemical stimulus;cellular response to cytokine stimulus;cellular response to organic substance;cellular response to stimulus;cytokine-mediated signaling pathway;gamete generation;male gamete generation;multicellular organismal process;multicellular organismal reproductive process;positive r…	binding;nucleic acid binding;RNA binding;RNA cap binding;translation factor activity, nucleic acid binding;translation initiation factor activity	cell part;cytoplasmic part;cytosol;eukaryotic translation initiation factor 4F complex;intracellular part;macromolecular complex;protein complex	3D-structure;Alternativesplicing;Coiledcoil;Completeproteome;Host-virusinteraction;Initiationfactor;Phosphoprotein;Polymorphism;Proteinbiosynthesis;Proteomicsidentification;Referenceproteome;Repeat;RNA-binding;Translationregulation	RNA transport;Viral myocarditis		37	31	30	20.5	16.9	16.5	180.5	0	70.188	2999500000	80	0.270678	0.213756	0.389464	A0A0A0MSA7;O43432;O43432-3;O43432-4;O43432-2;Q5SWD0	A0A0A0MSA7;O43432;O43432-3;O43432-4	Eukaryotic translation initiation factor 4 gamma 3	EIF4G3
0.991707	1.04591	1.02573	1.01825	1.17255	1.17616	0.964138	1.00053	0.979177	0.989538	0.967965	0.981176	1.0624	1.04741	0.965539	0.987897	1.00364	1.0118	1.02392	0.995058	0.997144	1.01115	0.967067	0.984389	anatomical structure morphogenesis;biological adhesion;biological regulation;camera-type eye morphogenesis;cell adhesion;cell-cell adhesion;cellular process;cellular response to stimulus;developmental process;eye morphogenesis;homophilic cell adhesion;organ morphogenesis;positive regulation of biological process;positive regulation of cell projection organization;positive regulation of cellular c…	binding;identical protein binding;protein binding;protein dimerization activity;protein heterodimerization activity;protein homodimerization activity	axon;cell part;cell projection;integral to membrane;intrinsic to membrane;membrane;membrane part;neuron projection	Celladhesion;Cellprojection;Completeproteome;Differentiation;Disulfidebond;EGF-likedomain;Glycoprotein;Membrane;Microphthalmia;Polymorphism;Proteomicsidentification;Referenceproteome;Repeat;Transmembrane;Transmembranehelix			3	3	3	1.3	1.3	1.3	281.76	0	5.2463	93612000	6	0.399664	0.583802	0.9443	A0A0A0MSD6;Q9P273	A0A0A0MSD6;Q9P273	Teneurin-3	TENM3
0.981292	1.00625	0.966552	1.0002	1.06637	1.05525	1.03113	1.03957	0.982415	0.971631	1.01502	0.895243	1.03047	1.01261	1.00637	1.01827	1.08208	1.02308	1.01122	1.01828	0.988899	1.005	0.913932	0.97894		binding;nucleic acid binding		Acetylation;Alternativesplicing;Coiledcoil;Completeproteome;Proteomicsidentification;Referenceproteome			7	7	7	22.5	22.5	22.5	33.277	0	10.157	2333300000	50	0.585158	0.910492	0.670846	A0A0A0MSF9;Q8N954;Q8N954-2	A0A0A0MSF9;Q8N954	G patch domain-containing protein 11	GPATCH11
0.958231	0.987899	1.09189	1.0361	1.0822	1.09664	1.02383	1.01874	1.01221	0.999178	0.970281	1.13007	1.0117	1.01774	0.985451	1.00919	0.925054	0.965576	1.0132	1.01981	0.987609	1.01916	1.05158	0.995215	cellular component organization;cellular component organization at cellular level;cellular component organization or biogenesis;cellular component organization or biogenesis at cellular level;cellular macromolecule metabolic process;cellular metabolic process;cellular nitrogen compound metabolic process;cellular process;cellular response to stimulus;cellular response to stress;chromatin modificat…	adenyl nucleotide binding;adenyl ribonucleotide binding;ATP binding;ATPase activity;ATPase activity, coupled;ATP-dependent DNA helicase activity;ATP-dependent helicase activity;binding;catalytic activity;DNA binding;DNA helicase activity;DNA-dependent ATPase activity;helicase activity;hydrolase activity;hydrolase activity, acting on acid anhydrides;hydrolase activity, acting on acid anhydrides, i…	cell part;cytoplasm;intracellular membrane-bounded organelle;intracellular organelle;intracellular organelle part;intracellular part;membrane;membrane-bounded organelle;nuclear part;nucleoplasm;nucleus;organelle;organelle part;plasma membrane	Alternativesplicing;ATP-binding;Coiledcoil;Completeproteome;DNAdamage;DNArepair;Helicase;Hydrolase;Nucleotide-binding;Nucleus;Phosphoprotein;Polymorphism;Proteomicsidentification;Referenceproteome			8	8	8	12	12	12	89.974	0	12.541	228980000	15	0.628454	0.403695	0.494575	A0A0A0MSH9;Q86WJ1-4;Q86WJ1;Q86WJ1-3;Q86WJ1-2;A0A0A0MRH8;Q86WJ1-5;A0A087WTM4	A0A0A0MSH9;Q86WJ1-4;Q86WJ1;Q86WJ1-3;Q86WJ1-2;A0A0A0MRH8;Q86WJ1-5	Chromodomain-helicase-DNA-binding protein 1-like	CHD1L
1.00054	1.02765	1.06724	1.03093	1.10029	1.10778	1.00107	1.00995	1.00722	1.00152	1.00069	1.10539	1.01692	1.01187	0.993077	1.00964	0.953041	0.992703	1.01393	1.02493	0.960514	0.986939	1.06831	1.02047	anatomical structure development;anatomical structure homeostasis;biological regulation;biosynthetic process;catabolic process;cell killing;cell proliferation;cellular biosynthetic process;cellular catabolic process;cellular macromolecule metabolic process;cellular metabolic process;cellular nitrogen compound metabolic process;cellular process;cellular response to chemical stimulus;cellular respo…	antioxidant activity;binding;catalytic activity;cation binding;heme binding;ion binding;iron ion binding;metal ion binding;oxidoreductase activity;oxidoreductase activity, acting on paired donors, with incorporation or reduction of molecular oxygen;oxidoreductase activity, acting on peroxide as acceptor;peroxidase activity;peroxiredoxin activity;tetrapyrrole binding;thioredoxin peroxidase activit…	cell part;chromatin;chromosomal part;cytoplasm;cytoplasmic membrane-bounded vesicle;cytoplasmic part;cytoplasmic vesicle;cytosol;euchromatin;extracellular membrane-bounded organelle;extracellular organelle;extracellular region part;extracellular space;extracellular vesicular exosome;intracellular membrane-bounded organelle;intracellular non-membrane-bounded organelle;intracellular organelle;intra…	3D-structure;Acetylation;Antioxidant;Completeproteome;Cytoplasm;Directproteinsequencing;Disulfidebond;Oxidoreductase;Peroxidase;Phosphoprotein;Polymorphism;Proteomicsidentification;Redox-activecenter;Referenceproteome	Peroxisome		18	18	14	61.4	61.4	48	18.976	0	58.872	194950000000	390	0.173952	0.467425	0.668676	A0A0A0MSI0;Q06830;A0A0A0MRQ5	A0A0A0MSI0;Q06830	Peroxiredoxin-1	PRDX1
0.99967	1.05424	1.10902	1.06072	1.06376	1.0494	1.00758	1.02387	0.991009	0.99056	1.00128	1.13777	1.02257	1.00928	0.991734	1.01864	0.878901	0.991241	1.03354	1.07415	0.921449	0.959602	1.04976	1.01188	cellular macromolecule metabolic process;cellular metabolic process;cellular process;cellular protein metabolic process;developmental process;gamete generation;macromolecule metabolic process;macromolecule modification;male gamete generation;metabolic process;multicellular organismal development;multicellular organismal process;multicellular organismal reproductive process;post-translational prot…	binding;cation binding;DNA binding;identical protein binding;ion binding;metal ion binding;nucleic acid binding;protein binding;transition metal ion binding;zinc ion binding	cell part;chromatin;chromosomal part;heterochromatin;intracellular membrane-bounded organelle;intracellular organelle;intracellular organelle part;intracellular part;macromolecular complex;membrane-bounded organelle;nuclear part;nucleoplasm;nucleus;organelle;organelle part;PcG protein complex;PRC1 complex;protein complex	Alternativesplicing;Completeproteome;Developmentalprotein;DNA-binding;Metal-binding;Nucleus;Phosphoprotein;Polymorphism;Proteomicsidentification;Referenceproteome;Zinc;Zinc-finger			4	4	3	8.2	8.2	5.4	50.403	0	6.3539	546390000	13	0.715177	0.275268	0.650752	B3KPJ4;A0A0A0MSI2;Q8IXK0-2;Q8IXK0-4;Q8IXK0;Q8IXK0-5;Q8IXK0-3	B3KPJ4;A0A0A0MSI2;Q8IXK0-2;Q8IXK0-4;Q8IXK0;Q8IXK0-5;Q8IXK0-3	Polyhomeotic-like protein 2	PHC2
0.996961	1.03501	1.06812	1.04621	1.0976	1.09232	0.999093	1.01666	1.00274	0.994786	1.0059	1.08328	1.03061	1.01654	0.990444	1.01356	0.924392	1.00357	1.02098	1.02459	0.97044	0.988788	1.05151	1.02383	cellular component organization;cellular component organization at cellular level;cellular component organization or biogenesis;cellular component organization or biogenesis at cellular level;cellular macromolecule metabolic process;cellular metabolic process;cellular process;cellular protein metabolic process;establishment of localization;establishment of localization in cell;establishment of pr…	binding;enzyme binding;GTPase binding;protein binding;Ral GTPase binding;Ras GTPase binding;small GTPase binding	cell part;cytoplasm;cytoplasmic part;cytosol;intracellular part	Acetylation;Coiledcoil;Completeproteome;Cytoplasm;Exocytosis;Phosphoprotein;Polymorphism;Proteintransport;Proteomicsidentification;Referenceproteome;Transport			13	13	13	19.3	19.3	19.3	82.118	0	25.712	838210000	43	0.445347	0.38746	0.678593	A0A0A0MSI8;O00471;F8W9B8;G3V4Z7	A0A0A0MSI8;O00471;F8W9B8	Exocyst complex component 5	EXOC5
0.988366	1.02685	1.0955	1.0314	1.07425	1.07371	1.00486	1.01676	1.00209	0.993728	1.02082	1.08495	1.02262	1.0104	0.989224	1.01538	0.953762	1.00129	1.0235	1.04183	0.957373	0.983844	1.06389	1.00601	anatomical structure development;biological adhesion;biological regulation;cell adhesion;cellular component organization;cellular component organization or biogenesis;cellular process;cellular response to stimulus;developmental process;gland development;intracellular signal transduction;mammary gland development;metabolic process;organ development;positive regulation of biological process;positiv…	binding;catalytic activity;enzyme activator activity;enzyme regulator activity;GTP binding;GTPase activator activity;GTPase activity;GTPase regulator activity;guanyl nucleotide binding;guanyl ribonucleotide binding;hydrolase activity;hydrolase activity, acting on acid anhydrides;hydrolase activity, acting on acid anhydrides, in phosphorus-containing anhydrides;nucleoside-triphosphatase activity;n…	cell part;cytoplasm;cytoplasmic part;cytosol;intracellular;intracellular part;membrane	3D-structure;Alternativesplicing;Completeproteome;Cytoplasm;GTPaseactivation;Membrane;Nitration;Phosphoprotein;Polymorphism;Proteomicsidentification;Referenceproteome;Repeat	Focal adhesion;Leukocyte transendothelial migration		17	17	17	14.4	14.4	14.4	171.68	0	57.135	1414900000	51	0.33569	0.587175	0.755216	A0A0A0MSK6;Q13017-2;Q13017;G3V360;Q13017-3;Q13017-4	A0A0A0MSK6;Q13017-2;Q13017	Rho GTPase-activating protein 5	ARHGAP5
1.01052	1.03645	1.01341	0.988792	1.09105	1.10304	1.01842	1.02399	0.985544	0.959492	0.969639	1.072	1.04882	1.02952	1.01489	1.03686	1.07666	1.01798	1.02475	1.05258	0.952962	0.969206	1.0692	1.01671	biological regulation;biosynthetic process;cellular biosynthetic process;cellular macromolecule biosynthetic process;cellular macromolecule metabolic process;cellular metabolic process;cellular nitrogen compound metabolic process;cellular process;macromolecule biosynthetic process;macromolecule metabolic process;metabolic process;nitrogen compound metabolic process;nucleic acid metabolic process;…	binding;chromatin binding;DNA binding;nucleic acid binding	cell part;intracellular membrane-bounded organelle;intracellular organelle;intracellular organelle part;intracellular part;membrane-bounded organelle;nuclear part;nucleoplasm;nucleus;organelle;organelle part	Acetylation;Completeproteome;DNA-binding;Nucleus;Phosphoprotein;Polymorphism;Proteomicsidentification;Referenceproteome;Transcription;Transcriptionregulation			4	4	4	4.4	4.4	4.4	111.83	0	12.457	181680000	11	0.00545687	0.81828	0.874786	A0A0A0MSU2;Q6PJG2;H7C1L3	A0A0A0MSU2;Q6PJG2;H7C1L3	ELM2 and SANT domain-containing protein 1	ELMSAN1
0.99452	1.0153	1.08566	1.04468	1.05976	1.08675	1.01677	1.02788	1.00042	0.999706	1.04616	1.11884	1.04615	1.02689	1.02397	1.03402	0.943555	1.02031	1.0194	1.03349	0.963507	0.979203	1.06641	1.00198	amide transport;antigen processing and presentation;antigen processing and presentation of endogenous antigen;antigen processing and presentation of endogenous peptide antigen;antigen processing and presentation of endogenous peptide antigen via MHC class I;antigen processing and presentation of exogenous antigen;antigen processing and presentation of exogenous peptide antigen;antigen processing …	active transmembrane transporter activity;antigen binding;ATPase activity;ATPase activity, coupled;ATPase activity, coupled to movement of substances;ATPase activity, coupled to transmembrane movement of substances;binding;catalytic activity;hydrolase activity;hydrolase activity, acting on acid anhydrides;hydrolase activity, acting on acid anhydrides, catalyzing transmembrane movement of substanc…	cell part;cytoplasmic part;endoplasmic reticulum;endoplasmic reticulum membrane;endoplasmic reticulum part;Golgi apparatus part;Golgi membrane;integral to endoplasmic reticulum membrane;integral to lumenal side of endoplasmic reticulum membrane;integral to membrane;integral to organelle membrane;intracellular membrane-bounded organelle;intracellular organelle;intracellular organelle part;intracel…	3D-structure;Alternativesplicing;Completeproteome;Directproteinsequencing;Disulfidebond;Endoplasmicreticulum;Glycoprotein;Immunoglobulindomain;Membrane;Polymorphism;Proteomicsidentification;Referenceproteome;Signal;Transmembrane;Transmembranehelix	Antigen processing and presentation		4	4	4	9	9	9	49.491	0	7.8251	1362900000	25	0.283058	0.446648	0.464262	A2AB90;A0A0A0MSV9;O15533-2;O15533;O15533-3;Q6P1N7;C9JA35;A0A0A0MT98;O15533-4	A2AB90;A0A0A0MSV9;O15533-2;O15533;O15533-3;Q6P1N7;C9JA35;A0A0A0MT98;O15533-4	Tapasin	TAPBP
0.949085	0.986268	1.09809	1.02991	1.02972	1.0211	1.00925	1.00248	0.99107	0.989708	1.02035	1.06102	1.03298	1.02476	0.994268	1.0087	0.984381	0.971245	0.990317	0.981739	1.00048	1.01272	1.03097	1.00614	alcohol metabolic process;biological regulation;biosynthetic process;C21-steroid hormone biosynthetic process;C21-steroid hormone metabolic process;cellular biosynthetic process;cellular hormone metabolic process;cellular ketone metabolic process;cellular metabolic process;cellular nitrogen compound metabolic process;cellular process;cholesterol metabolic process;coenzyme biosynthetic process;coe…	binding;catalytic activity;coenzyme binding;cofactor binding;ferredoxin-NADP+ reductase activity;NADP binding;NADPH binding;NADPH-adrenodoxin reductase activity;nucleotide binding;oxidoreductase activity;oxidoreductase activity, acting on iron-sulfur proteins as donors;oxidoreductase activity, acting on iron-sulfur proteins as donors, NAD or NADP as acceptor	cell part;cytoplasmic part;intracellular membrane-bounded organelle;intracellular organelle;intracellular organelle lumen;intracellular organelle part;intracellular part;membrane;membrane-bounded organelle;membrane-enclosed lumen;mitochondrial inner membrane;mitochondrial matrix;mitochondrial membrane;mitochondrial part;mitochondrion;organelle;organelle inner membrane;organelle lumen;organelle me…	Alternativesplicing;Cholesterolmetabolism;Completeproteome;Electrontransport;FAD;Flavoprotein;Lipidmetabolism;Mitochondrion;NADP;Oxidoreductase;Polymorphism;Proteomicsidentification;Referenceproteome;Steroidmetabolism;Sterolmetabolism;Transitpeptide;Transport			10	10	10	25.9	25.9	25.9	52.89	0	17.823	820740000	25	0.444775	0.846152	0.902471	A0A0A0MTR6;A0A0A0MSZ4;P22570-5;P22570;P22570-2;P22570-7;A0A0A0MTN9;J3QQX3;A0A0A0MT64;P22570-4;P22570-6;P22570-3;J3QKZ8;J3QQW7	A0A0A0MTR6;A0A0A0MSZ4;P22570-5;P22570;P22570-2;P22570-7;A0A0A0MTN9;J3QQX3;A0A0A0MT64;P22570-4;P22570-6;P22570-3	NADPH:adrenodoxin oxidoreductase, mitochondrial	FDXR
0.988949	1.02094	1.16339	1.11008	1.06656	1.10113	0.993157	1.00672	1.00369	0.987634	0.988295	1.1525	1.00646	1.02033	1.00593	1.02017	0.898688	0.991061	1.02676	1.03828	0.941407	0.974202	1.07654	0.986734	biological regulation;biosynthetic process;cellular biosynthetic process;cellular macromolecule biosynthetic process;cellular macromolecule metabolic process;cellular metabolic process;cellular nitrogen compound metabolic process;cellular process;cellular protein metabolic process;macromolecule biosynthetic process;macromolecule metabolic process;metabolic process;nitrogen compound metabolic proc…	binding;DNA binding;nucleic acid binding;nucleic acid binding transcription factor activity;protein binding transcription factor activity;regulatory region DNA binding;regulatory region nucleic acid binding;sequence-specific DNA binding;sequence-specific DNA binding transcription factor activity;transcription coactivator activity;transcription cofactor activity;transcription factor binding transc…	CCAAT-binding factor complex;cell part;intracellular membrane-bounded organelle;intracellular organelle;intracellular organelle part;intracellular part;macromolecular complex;membrane-bounded organelle;nuclear part;nucleoplasm;nucleoplasm part;nucleus;organelle;organelle part;protein complex;protein-DNA complex;transcription factor complex	3D-structure;Activator;Alternativesplicing;Completeproteome;DNA-binding;Nucleus;Polymorphism;Proteomicsidentification;Referenceproteome;Transcription;Transcriptionregulation	Antigen processing and presentation;ko05152		4	4	4	29.5	29.5	29.5	14.909	0	4.0208	347740000	9	0.741396	0.372764	0.507392	Q5T6K7;E9PI99;A0A0A0MT00;Q5T6K5;Q13952-6;Q13952-7;Q13952-2;Q13952-5;Q13952-3;Q13952;E9PQR2;Q13952-4;E9PJA8;E9PL11	Q5T6K7;E9PI99;A0A0A0MT00;Q5T6K5;Q13952-6;Q13952-7;Q13952-2;Q13952-5;Q13952-3;Q13952;E9PQR2;Q13952-4	Nuclear transcription factor Y subunit gamma	NFYC
0.986673	1.00581	1.00893	0.991792	1.02135	1.04058	1.0158	1.02185	1.00105	0.993272	1.03551	1.00023	1.01649	1.01529	0.983373	1.00515	1.02391	0.993388	1.00049	0.982482	0.976126	1.02014	1.02007	1.01171	biological regulation;biosynthetic process;catabolic process;cell proliferation;cellular biosynthetic process;cellular catabolic process;cellular macromolecule biosynthetic process;cellular macromolecule catabolic process;cellular macromolecule metabolic process;cellular metabolic process;cellular nitrogen compound metabolic process;cellular process;macromolecule biosynthetic process;macromolecul…	binding;catalytic activity;DNA binding;endonuclease activity;enzyme inhibitor activity;enzyme regulator activity;hydrolase activity;hydrolase activity, acting on ester bonds;nuclease activity;nucleic acid binding;phosphatase inhibitor activity;phosphatase regulator activity;protein phosphatase inhibitor activity;protein phosphatase regulator activity;protein phosphatase type 1 regulator activity;…	cell part;cytoplasm;intracellular membrane-bounded organelle;intracellular organelle;intracellular organelle part;intracellular part;macromolecular complex;membrane-bounded organelle;nuclear body;nuclear part;nuclear speck;nucleoplasm;nucleoplasm part;nucleus;organelle;organelle part;ribonucleoprotein complex;spliceosomal complex	3D-structure;Alternativesplicing;Completeproteome;Cytoplasm;DNA-binding;Endonuclease;Hydrolase;Magnesium;mRNAprocessing;mRNAsplicing;Nuclease;Nucleus;Phosphoprotein;Proteinphosphataseinhibitor;Proteomicsidentification;Referenceproteome;Repeat;Repressor;RNA-binding;Spliceosome;Transcription;Transcriptionregulation			8	8	1	42	42	3.9	22.284	0	61.26	817680000	30	0.04713	0.865972	0.349775	A0A0A0MT09;Q12972-2	A0A0A0MT09;Q12972-2	Nuclear inhibitor of protein phosphatase 1;Activator of RNA decay	PPP1R8
0.935385	0.971419	1.18569	1.05041	1.1381	1.13184	0.99247	0.992231	1.01062	0.988223	1.00046	1.12476	1.02354	1.01375	0.989555	1.00885	0.91801	0.959481	1.00259	0.965407	0.993389	1.0239	1.2131	1.06863	apocarotenoid metabolic process;bile acid and bile salt transport;bile acid metabolic process;biological regulation;C21-steroid hormone metabolic process;carboxylic acid metabolic process;carboxylic acid transport;cell differentiation;cell surface receptor linked signaling pathway;cellular aldehyde metabolic process;cellular component assembly;cellular component organization;cellular component or…	17-alpha,20-alpha-dihydroxypregn-4-en-3-one dehydrogenase activity;alcohol dehydrogenase (NADP+) activity;alditol:NADP+ 1-oxidoreductase activity;aldo-keto reductase (NADP) activity;androsterone dehydrogenase (B-specific) activity;androsterone dehydrogenase activity;bile acid binding;binding;carboxylic acid binding;catalytic activity;indanol dehydrogenase activity;ketosteroid monooxygenase activi…	cell part;cytoplasm;cytoplasmic part;cytosol;extracellular membrane-bounded organelle;extracellular organelle;extracellular region part;extracellular vesicular exosome;intracellular part;membrane-bounded organelle;membrane-bounded vesicle;organelle;vesicle	3D-structure;Alternativesplicing;Completeproteome;Cytoplasm;Directproteinsequencing;Diseasemutation;Lipidmetabolism;NADP;Oxidoreductase;Polymorphism;Proteomicsidentification;Referenceproteome;Steroidmetabolism	Metabolism of xenobiotics by cytochrome P450;Steroid hormone biosynthesis		7	7	3	27.5	27.5	14.2	37.115	0	17.027	819790000	24	0.161765	0.706785	0.915025	A0A0A0MT30;Q04828;H0Y804;B4DK69;P52895;A0A0A0MSD5;S4R3P0;P52895-2	A0A0A0MT30;Q04828;H0Y804;B4DK69;P52895;A0A0A0MSD5	Aldo-keto reductase family 1 member C1;Aldo-keto reductase family 1 member C2	AKR1C1;AKR1C2
0.970327	0.997733	0.946022	0.950265	1.05719	1.06719	0.979588	1.01368	0.986153	0.956359	1.01036	1.01659	1.02216	1.02077	0.995836	1.00402	1.01294	1.01345	1.03401	1.03149	0.993947	1.02152	0.931914	0.956668	cellular macromolecule metabolic process;cellular metabolic process;cellular nitrogen compound metabolic process;cellular process;macromolecule metabolic process;metabolic process;mRNA metabolic process;mRNA processing;nitrogen compound metabolic process;nucleic acid metabolic process;nucleobase-containing compound metabolic process;primary metabolic process;RNA metabolic process;RNA processing;R…	binding;enzyme binding;nucleic acid binding;nucleotide binding;protein binding;RNA binding;RNA polymerase binding;RNA polymerase core enzyme binding	cell part;intracellular organelle part;intracellular part;macromolecular complex;nuclear matrix;nuclear part;nucleoplasm;organelle part;ribonucleoprotein complex;spliceosomal complex	3D-structure;Alternativesplicing;Completeproteome;Isopeptidebond;mRNAprocessing;mRNAsplicing;Nucleus;Phosphoprotein;Polymorphism;Proteomicsidentification;Referenceproteome;RNA-binding;Spliceosome;Ublconjugation			12	10	10	9.4	8.4	8.4	148.86	0	22.105	1030600000	30	0.138391	0.347598	0.741349	A0A0A0MT33;Q9UPN6;Q9UPN6-2	A0A0A0MT33;Q9UPN6;Q9UPN6-2	Protein SCAF8	SCAF8
1.00098	1.02995	1.07103	1.02588	1.04764	1.05291	1.00625	1.01602	1.00101	0.99557	1.00982	1.08519	1.02299	1.0156	0.990123	1.01095	0.96588	0.99148	1.00126	0.99634	0.982508	0.99666	1.05127	1.02204	anatomical structure development;anatomical structure formation involved in morphogenesis;anatomical structure morphogenesis;aortic smooth muscle cell differentiation;appendage morphogenesis;ATP-dependent chromatin remodeling;biological regulation;blastocyst growth;blastocyst hatching;cell development;cell differentiation;cell fate determination;cell morphogenesis;cellular component disassembly;c…	adenyl nucleotide binding;adenyl ribonucleotide binding;androgen receptor binding;ATP binding;ATPase activity;ATPase activity, coupled;binding;catalytic activity;chromatin binding;DNA binding;DNA polymerase binding;DNA-dependent ATPase activity;enzyme binding;helicase activity;histone acetyl-lysine binding;histone binding;hormone receptor binding;hydrolase activity;hydrolase activity, acting on a…	cell part;chromatin;chromatin remodeling complex;chromosomal part;euchromatin;extracellular region part;extracellular space;heterochromatin;intracellular membrane-bounded organelle;intracellular non-membrane-bounded organelle;intracellular organelle;intracellular organelle part;intracellular part;macromolecular complex;membrane;membrane-bounded organelle;nBAF complex;non-membrane-bounded organell…	3D-structure;Acetylation;Activator;Alternativesplicing;ATP-binding;Bromodomain;Chromatinregulator;Completeproteome;Diseasemutation;Helicase;Hydrolase;Mentalretardation;Neurogenesis;Nucleotide-binding;Nucleus;Phosphoprotein;Polymorphism;Proteomicsidentification;Referenceproteome;Repressor;Transcription;Transcriptionregulation			30	30	23	16.1	16.1	11.9	188.15	0	154.69	3998600000	96	0.404804	0.582499	0.668226	Q9HBD4;A0A0A0MT49;P51532-5;P51532-2;P51532-3;P51532-4;P51532;K7EP28	Q9HBD4;A0A0A0MT49;P51532-5;P51532-2;P51532-3;P51532-4;P51532	Transcription activator BRG1	SMARCA4
1.03351	1.09151	1.01532	1.07034	1.2336	1.20157	0.963741	1.01493	0.981182	0.955337	0.969157	0.921242	1.02043	0.994985	1.01468	1.00154	0.958906	1.02482	1.13409	1.18125	0.934952	0.928368	0.941591	0.934302	biological regulation;biosynthetic process;cellular biosynthetic process;cellular macromolecule metabolic process;cellular metabolic process;cellular process;cellular protein metabolic process;chaperone-mediated protein folding;macromolecule metabolic process;macromolecule modification;metabolic process;oxidation-reduction process;peptidyl-amino acid modification;peptidyl-diphthamide biosynthetic…	ATPase activator activity;ATPase regulator activity;binding;cation binding;enzyme activator activity;enzyme regulator activity;ferrous iron binding;ion binding;iron ion binding;metal ion binding;nucleoside-triphosphatase regulator activity;transition metal ion binding;zinc ion binding	cell part;cytoplasm;cytoskeleton;intracellular non-membrane-bounded organelle;intracellular organelle;intracellular part;non-membrane-bounded organelle;organelle	3D-structure;Alternativesplicing;Chaperone;Completeproteome;Cytoplasm;Cytoskeleton;Directproteinsequencing;Electrontransport;Iron;Metal-binding;Polymorphism;Proteomicsidentification;Referenceproteome;Transport;Zinc;Zinc-finger			2	2	2	31.8	31.8	31.8	9.8241	0	6.5778	174500000	10	0.367767	0.646999	0.946524	D3DQZ6;A0A0A0MT77;Q6P3W2-2;Q6P3W2;E9PRW3;E9PID3	D3DQZ6;A0A0A0MT77;Q6P3W2-2;Q6P3W2;E9PRW3;E9PID3	DnaJ homolog subfamily C member 24	ZCSL3;DNAJC24
0.966225	0.998897	1.10895	1.04201	1.07981	1.11222	1.00733	1.00957	0.999199	0.996281	0.997624	1.1467	1.02111	1.01284	0.998575	1.01731	0.91458	0.97233	1.00194	0.995674	0.987691	1.00545	1.08034	1.02847	amine catabolic process;amine metabolic process;branched chain family amino acid catabolic process;branched chain family amino acid metabolic process;carboxylic acid catabolic process;carboxylic acid metabolic process;catabolic process;cellular amine metabolic process;cellular amino acid catabolic process;cellular amino acid metabolic process;cellular catabolic process;cellular ketone metabolic p…	acyl-CoA dehydrogenase activity;binding;catalytic activity;coenzyme binding;cofactor binding;flavin adenine dinucleotide binding;isovaleryl-CoA dehydrogenase activity;oxidoreductase activity;oxidoreductase activity, acting on the CH-CH group of donors	cell part;cytoplasmic part;intracellular membrane-bounded organelle;intracellular organelle;intracellular organelle lumen;intracellular organelle part;intracellular part;membrane;membrane-bounded organelle;membrane-enclosed lumen;mitochondrial matrix;mitochondrial membrane;mitochondrial part;mitochondrion;nuclear part;nucleoplasm;organelle;organelle lumen;organelle membrane;organelle part	3D-structure;Acetylation;Alternativesplicing;Completeproteome;Directproteinsequencing;Diseasemutation;FAD;Flavoprotein;Mitochondrion;Oxidoreductase;Proteomicsidentification;Referenceproteome;Transitpeptide	Valine, leucine and isoleucine degradation		10	10	10	26.3	26.3	26.3	46.65	0	25.433	2503300000	49	0.344725	0.524864	0.462808	A0A0A0MT83;P26440;P26440-2;H0YLC3;H7C4G6;H0YKV0;H0YN10;A0A087WVD3	A0A0A0MT83;P26440;P26440-2;H0YLC3;H7C4G6	Isovaleryl-CoA dehydrogenase, mitochondrial	IVD
0.988405	1.02786	1.07623	1.03536	1.04453	1.05898	1.0067	1.0251	1.01211	1.00798	1.01277	1.16458	1.02871	1.02002	0.989613	1.01281	0.948719	0.976105	1.00416	1.02291	0.967397	0.990138	1.02745	0.996554	anatomical structure homeostasis;biological regulation;cellular macromolecule metabolic process;cellular metabolic process;cellular nitrogen compound metabolic process;cellular process;homeostatic process;macromolecule metabolic process;metabolic process;multicellular organismal process;ncRNA metabolic process;ncRNA processing;neurological system process;nitrogen compound metabolic process;nuclei…		cell part;intracellular non-membrane-bounded organelle;intracellular organelle;intracellular organelle part;intracellular part;macromolecular complex;non-membrane-bounded organelle;nuclear part;nucleolar part;nucleolus;organelle;organelle part;preribosome;protein complex;Pwp2p-containing subcomplex of 90S preribosome;ribonucleoprotein complex;small-subunit processome	Completeproteome;Diseasemutation;Glaucoma;Nucleus;Polymorphism;Proteomicsidentification;Referenceproteome;Repeat;Ribosomebiogenesis;rRNAprocessing;Sensorytransduction;Vision;WDrepeat	Ribosome biogenesis in eukaryotes		15	15	15	16.9	16.9	16.9	99.365	0	61.285	3782400000	73	0.59651	0.234692	0.434993	A0A0A0MTB8;Q8NI36	A0A0A0MTB8;Q8NI36	WD repeat-containing protein 36	WDR36
0.965805	1.00186	1.06594	1.02799	1.03771	1.0278	1.00009	1.01204	1.00411	0.986902	1.01567	1.07604	1.0242	1.01895	0.995496	1.01157	1.03721	0.998359	1.01022	1.0109	0.985122	1.00487	1.07148	1.04685	cellular macromolecule metabolic process;cellular metabolic process;cellular process;cellular protein metabolic process;macromolecule metabolic process;macromolecule modification;metabolic process;primary metabolic process;protein autoubiquitination;protein metabolic process;protein modification by small protein conjugation;protein modification by small protein conjugation or removal;protein modi…	acid-amino acid ligase activity;ATPase activity;binding;catalytic activity;cation binding;hydrolase activity;hydrolase activity, acting on acid anhydrides;hydrolase activity, acting on acid anhydrides, in phosphorus-containing anhydrides;ion binding;ligase activity;ligase activity, forming carbon-nitrogen bonds;metal ion binding;nucleoside-triphosphatase activity;pyrophosphatase activity;small co…	cell part;cytoplasm;intracellular non-membrane-bounded organelle;intracellular organelle;intracellular organelle part;intracellular part;membrane;non-membrane-bounded organelle;nuclear part;nucleolus;organelle;organelle part	Alternativesplicing;Chromosomalrearrangement;Coiledcoil;Completeproteome;Cytoplasm;Diseasemutation;Ligase;Metal-binding;Phosphoprotein;Proteomicsidentification;Proto-oncogene;Referenceproteome;Ublconjugation;Ublconjugationpathway;Zinc;Zinc-finger			19	19	18	4	4	3.9	591.4	0	31.681	1198400000	43	0.0626088	0.881885	0.762856	A0A0A0MTR7;A0A0A0MTC1;Q63HN8;Q63HN8-4;Q63HN8-5;Q63HN8-6;I3L3H9	A0A0A0MTR7;A0A0A0MTC1;Q63HN8;Q63HN8-4	E3 ubiquitin-protein ligase RNF213	RNF213
0.96471	1.0085	1.09819	1.03779	1.10353	1.10223	1.00366	1.01443	1.00253	1.00125	1.0017	1.05832	1.03629	1.01823	0.979237	0.998108	0.974709	0.993982	1.01214	1.01373	0.98184	1.01423	1.00942	0.990057	establishment of localization;transport	binding;double-stranded RNA binding;nucleic acid binding;RNA binding	cell part;cytoplasmic part;cytoskeletal part;endoplasmic reticulum;intracellular membrane-bounded organelle;intracellular non-membrane-bounded organelle;intracellular organelle;intracellular organelle part;intracellular part;macromolecular complex;membrane;membrane-bounded organelle;microtubule;non-membrane-bounded organelle;nuclear part;nucleolus;organelle;organelle part;protein complex	Alternativesplicing;Completeproteome;Cytoplasm;Endoplasmicreticulum;Microtubule;Nucleus;Phosphoprotein;Polymorphism;Proteomicsidentification;Referenceproteome;Repeat;RNA-binding;Transport			14	9	9	35.4	28.9	28.9	43.278	0	24.483	374610000	17	0.457376	0.577286	0.75575	A0A0A0MTC4;E9PH62;A0A0A0MTC5;Q9NUL3-6;Q9NUL3-2;Q9NUL3;E5RJN7;A0A0A0MTD1;F8VPI7;E7EPX0;A0A0A0MTC6;E7EVJ4;Q9NUL3-4;Q9NUL3-8;Q9NUL3-3;Q9NUL3-7;G5EA18;E7EVI1;E5RJ67;H0YBY0;E5RFK1	A0A0A0MTC4;E9PH62;A0A0A0MTC5;Q9NUL3-6;Q9NUL3-2;Q9NUL3;E5RJN7;A0A0A0MTD1;F8VPI7;E7EPX0;A0A0A0MTC6;E7EVJ4;Q9NUL3-4;Q9NUL3-8;Q9NUL3-3;Q9NUL3-7;G5EA18;E7EVI1	Double-stranded RNA-binding protein Staufen homolog 2	STAU2
0.977775	1.00742	1.02239	1.012	1.09273	1.08747	1.00483	1.01245	0.974281	0.971609	1.04774	1.08968	1.02811	1.02127	0.993604	1.01448	0.988669	1.00431	1.00309	1.00461	1.00042	1.01914	1.00568	0.987766	amine metabolic process;amino acid activation;carboxylic acid metabolic process;cellular amine metabolic process;cellular amino acid metabolic process;cellular ketone metabolic process;cellular macromolecule metabolic process;cellular metabolic process;cellular nitrogen compound metabolic process;cellular process;gene expression;macromolecule metabolic process;metabolic process;ncRNA metabolic pr…	adenyl nucleotide binding;adenyl ribonucleotide binding;aminoacyl-tRNA editing activity;aminoacyl-tRNA ligase activity;ATP binding;binding;carboxylic ester hydrolase activity;catalytic activity;hydrolase activity;hydrolase activity, acting on ester bonds;ligase activity;ligase activity, forming aminoacyl-tRNA and related compounds;ligase activity, forming carbon-oxygen bonds;nucleotide binding;pu…	cell part;cytoplasmic part;intracellular membrane-bounded organelle;intracellular organelle;intracellular part;membrane-bounded organelle;mitochondrion;organelle	Alternativesplicing;Aminoacyl-tRNAsynthetase;ATP-binding;Completeproteome;Diseasemutation;Ligase;Mitochondrion;Nucleotide-binding;Polymorphism;Proteinbiosynthesis;Proteomicsidentification;Referenceproteome;Transitpeptide	Aminoacyl-tRNA biosynthesis;Valine, leucine and isoleucine biosynthesis		2	2	2	1.3	1.3	1.3	118.36	0	25.171	90849000	5	0.0247609	0.40852	0.762226	A0A0A0MTG1;Q5ST30-2;Q5ST30-3;Q5ST30;Q5ST30-4	A0A0A0MTG1;Q5ST30-2;Q5ST30-3;Q5ST30;Q5ST30-4	Valine--tRNA ligase, mitochondrial	VARS2
0.945921	0.973068	1.09626	1.03467	1.10283	1.11405	1.02446	1.01802	1.00088	0.972929	1.04717	1.04011	1.0571	1.04911	1.00046	1.01414	1.0183	1.00826	0.96611	0.969061	1.02285	1.02101	1.04471	1.00377	aging;alcohol metabolic process;biological regulation;cellular process;cellular response to stimulus;cholesterol metabolic process;developmental process;ER-nucleus signaling pathway;lipid metabolic process;metabolic process;negative regulation of biological process;negative regulation of biosynthetic process;negative regulation of cholesterol biosynthetic process;negative regulation of cholestero…	binding;cholesterol binding;lipid binding;protein binding;steroid binding;sterol binding;unfolded protein binding	cell part;coated vesicle membrane;cytoplasmic part;cytoplasmic vesicle membrane;cytoplasmic vesicle part;endoplasmic reticulum;endoplasmic reticulum membrane;endoplasmic reticulum part;ER to Golgi transport vesicle membrane;Golgi apparatus;Golgi apparatus part;Golgi membrane;integral to membrane;intracellular membrane-bounded organelle;intracellular organelle;intracellular organelle part;intracel…	Alternativesplicing;Cholesterolmetabolism;Completeproteome;Cytoplasmicvesicle;Endoplasmicreticulum;Glycoprotein;Golgiapparatus;Lipidmetabolism;Membrane;Phosphoprotein;Polymorphism;Proteomicsidentification;Referenceproteome;Repeat;Steroidmetabolism;Sterolmetabolism;Transmembrane;Transmembranehelix;WDrepeat			2	2	2	2.4	2.4	2.4	97.936	0	13.472	111770000	6	0.0761113	0.665122	0.82921	A0A0A0MTG6;Q12770-4;Q12770-2;Q12770	A0A0A0MTG6;Q12770-4;Q12770-2;Q12770	Sterol regulatory element-binding protein cleavage-activating protein	SCAP
0.958366	1.00883	1.04671	0.985966	1.19459	1.21443	1.02381	1.02789	1.00934	0.992701	1.04736	0.997416	1.02108	1.02403	1.0151	1.02399	1.10074	1.10489	1.05792	1.05406	0.948599	0.993873	0.989367	1.04639	anatomical structure morphogenesis;axis elongation;biological regulation;branch elongation of an epithelium;bud elongation involved in lung branching;cell cycle process;cell fate commitment;cell surface receptor linked signaling pathway;cellular component organization;cellular component organization at cellular level;cellular component organization or biogenesis;cellular component organization or…	binding;enzyme activator activity;enzyme binding;enzyme inhibitor activity;enzyme regulator activity;kinase activator activity;kinase binding;kinase inhibitor activity;kinase regulator activity;protein binding;protein kinase activator activity;protein kinase binding;protein kinase inhibitor activity;protein kinase regulator activity;protein serine/threonine kinase activator activity;protein serin…	cell part;cell projection membrane;cell projection part;cytoplasmic part;cytoskeletal part;cytoskeleton;cytosol;intracellular non-membrane-bounded organelle;intracellular organelle;intracellular organelle part;intracellular part;leading edge membrane;macromolecular complex;membrane;membrane part;microtubule;microtubule cytoskeleton;non-membrane-bounded organelle;organelle;organelle part;plasma me…	3D-structure;Cellmembrane;Cellprojection;Completeproteome;Cytoplasm;Cytoskeleton;Developmentalprotein;Membrane;Microtubule;Polymorphism;Proteomicsidentification;Referenceproteome	Jak-STAT signaling pathway		3	3	3	9.9	9.9	9.9	39.19	0	11.927	185400000	7	0.0217211	0.856293	0.874383	A0A0A0MTG9;O43597	A0A0A0MTG9;O43597	Protein sprouty homolog 2	SPRY2
1.00619	1.03562	1.0839	1.0291	1.06837	1.07891	1.01307	1.01572	1.00588	0.996112	1.01089	1.13888	1.024	1.01896	0.987428	1.00868	0.970551	0.999519	1.0081	1.03309	0.955618	0.973764	1.09919	1.03149	aging;ameboidal cell migration;anatomical structure development;anatomical structure formation involved in morphogenesis;anatomical structure morphogenesis;axon ensheathment;biological adhesion;biological regulation;branching involved in ureteric bud morphogenesis;branching morphogenesis of a tube;cell adhesion;cell aging;cell cycle arrest;cell cycle process;cell junction assembly;cell junction o…	adenyl nucleotide binding;adenyl ribonucleotide binding;ATP binding;binding;catalytic activity;enzyme binding;kinase activity;kinase binding;molecular transducer activity;nucleotide binding;phosphotransferase activity, alcohol group as acceptor;protein binding;protein kinase activity;protein kinase binding;protein serine/threonine kinase activity;purine nucleotide binding;purine ribonucleoside tr…	actin filament bundle;actomyosin;adherens junction;anchoring junction;axon part;cell body;cell junction;cell part;cell projection;cell projection part;cell-cell junction;cell-substrate adherens junction;cell-substrate junction;contractile fiber part;costamere;cytoplasm;cytoplasmic part;cytoskeletal part;cytosol;dendritic shaft;focal adhesion;intracellular organelle part;intracellular part;lamelli…	3D-structure;Acetylation;Alternativesplicing;ANKrepeat;ATP-binding;Celljunction;Cellmembrane;Cellprojection;Completeproteome;Cytoplasm;Kinase;Membrane;Nucleotide-binding;Phosphoprotein;Polymorphism;Proteomicsidentification;Referenceproteome;Repeat;Serine/threonine-proteinkinase;Transferase	Bacterial invasion of epithelial cells;Endometrial cancer;Focal adhesion;PPAR signaling pathway		25	25	25	39.8	39.8	39.8	54.611	0	38.414	6199000000	112	0.121451	0.565039	0.645356	A0A0A0MTH3;Q13418;Q13418-3;Q13418-2;E9PQ52;A0A087WW45;A0A087WWY6	A0A0A0MTH3;Q13418;Q13418-3;Q13418-2	Integrin-linked protein kinase	ILK
1.00474	1.03645	1.11418	1.03936	1.08605	1.09652	0.994798	1.01057	1.00611	0.984742	0.98726	1.06192	1.00966	1.0087	0.979968	1.00885	0.952203	0.995376	1.0265	1.0394	0.971739	0.983809	0.966439	0.97348	biological regulation;negative regulation of binding;negative regulation of biological process;negative regulation of biosynthetic process;negative regulation of cellular biosynthetic process;negative regulation of cellular macromolecule biosynthetic process;negative regulation of cellular metabolic process;negative regulation of cellular process;negative regulation of chromatin binding;negative …	adenyl nucleotide binding;adenyl ribonucleotide binding;ATP binding;binding;catalytic activity;DNA binding;helicase activity;hydrolase activity;hydrolase activity, acting on acid anhydrides;hydrolase activity, acting on acid anhydrides, in phosphorus-containing anhydrides;nucleic acid binding;nucleic acid binding transcription factor activity;nucleoside-triphosphatase activity;nucleotide binding;…	cell part;intracellular membrane-bounded organelle;intracellular organelle;intracellular part;membrane-bounded organelle;nucleus;organelle	Alternativesplicing;ATP-binding;Completeproteome;Directproteinsequencing;DNA-binding;Helicase;Hydrolase;Nucleotide-binding;Nucleus;Proteomicsidentification;Referenceproteome;Repeat			9	9	9	6.7	6.7	6.7	206.93	0	25.571	479100000	21	0.911837	0.397954	0.359623	A0A0A0MTH9;O14981;O14981-2	A0A0A0MTH9;O14981	TATA-binding protein-associated factor 172	BTAF1
0.966968	0.925613	1.22795	1.06707	1.05411	1.06469	1.03239	1.01287	1.00489	1.0145	1.09101	1.38529	1.02385	1.00997	0.950214	0.999421	0.87115	0.924155	1.01789	1.06733	0.94821	0.968451	1.19654	1.02143	acyl-CoA biosynthetic process;acyl-CoA metabolic process;acylglycerol biosynthetic process;acylglycerol metabolic process;biosynthetic process;carboxylic acid biosynthetic process;carboxylic acid metabolic process;cellular biosynthetic process;cellular ketone metabolic process;cellular lipid metabolic process;cellular metabolic process;cellular process;coenzyme biosynthetic process;coenzyme metab…	catalytic activity;fatty acid elongase activity;fatty acid synthase activity;transferase activity;transferase activity, transferring acyl groups;transferase activity, transferring acyl groups other than amino-acyl groups	cell body;cell part;cell projection;cytoplasmic part;dendrite;endoplasmic reticulum;endoplasmic reticulum membrane;endoplasmic reticulum part;integral to membrane;intracellular membrane-bounded organelle;intracellular organelle;intracellular organelle part;intracellular part;intrinsic to membrane;membrane;membrane part;membrane-bounded organelle;neuron projection;neuronal cell body;organelle;orga…	Alternativesplicing;Cellprojection;Completeproteome;Diseasemutation;Endoplasmicreticulum;Fattyacidbiosynthesis;Fattyacidmetabolism;Lipidbiosynthesis;Lipidmetabolism;Membrane;Neurodegeneration;Phosphoprotein;Proteomicsidentification;Referenceproteome;Spinocerebellarataxia;Transferase;Transmembrane;Transmembranehelix	Biosynthesis of unsaturated fatty acids		3	3	3	11.8	11.8	11.8	30.742	0	3.6271	283600000	6	0.439386	0.875593	0.730279	A0A0A0MTI6;Q9NYP7;Q9NYP7-2;Q9NYP7-3	A0A0A0MTI6;Q9NYP7;Q9NYP7-2	Elongation of very long chain fatty acids protein;Elongation of very long chain fatty acids protein 5	ELOVL5
1.02124	1.06701	1.09301	1.04279	1.08784	1.09503	1.01335	1.02549	1.01602	1.0159	1.02781	1.21918	1.02346	1.01747	0.989317	1.01925	0.924447	0.973562	1.00701	1.04342	0.943953	0.970807	1.15642	1.0365	biological regulation;catabolic process;cellular macromolecule metabolic process;cellular metabolic process;cellular process;cellular protein metabolic process;cellular response to stimulus;dephosphorylation;lipid catabolic process;lipid metabolic process;macromolecule metabolic process;macromolecule modification;metabolic process;phosphate-containing compound metabolic process;phosphorus metabol…	anion binding;binding;carboxylic ester hydrolase activity;catalytic activity;hydrolase activity;hydrolase activity, acting on ester bonds;ion binding;phosphate ion binding;serine hydrolase activity	cell part;cytoplasmic part;endoplasmic reticulum;integral to membrane;intracellular membrane-bounded organelle;intracellular organelle;intracellular part;intrinsic to membrane;membrane;membrane part;membrane-bounded organelle;organelle	Alternativesplicing;Completeproteome;Endoplasmicreticulum;Glycoprotein;Hydrolase;Lipiddegradation;Lipidmetabolism;Membrane;Microsome;Polymorphism;Proteomicsidentification;Referenceproteome;Signal-anchor;Transmembrane;Transmembranehelix	Bile secretion		9	9	9	23.2	23.2	23.2	49.881	0	54.645	12436000000	103	0.255199	0.49828	0.804521	A0A0A0MTJ9;Q6PIU2;Q6PIU2-2;H7C046;Q6PIU2-3;F8WE33	A0A0A0MTJ9;Q6PIU2;Q6PIU2-2;H7C046;Q6PIU2-3	Neutral cholesterol ester hydrolase 1	NCEH1
1.02235	1.06221	1.07302	1.03329	1.05362	1.05239	1.00643	1.01056	1.00483	0.998133	1.01755	1.18186	1.02357	1.01586	0.997432	1.01093	0.947133	0.987897	1.01023	1.04625	0.945008	0.969609	1.06865	1.00853	biological regulation;catabolic process;cell cycle arrest;cell cycle process;cellular catabolic process;cellular macromolecule catabolic process;cellular macromolecule metabolic process;cellular metabolic process;cellular process;cellular protein metabolic process;cellular response to chemical stimulus;cellular response to hypoxia;cellular response to oxygen levels;cellular response to stimulus;c…	binding;enzyme binding;protein binding;ubiquitin protein ligase binding	cell part;Cul2-RING ubiquitin ligase complex;cullin-RING ubiquitin ligase complex;cytoplasmic part;cytoplasmic ubiquitin ligase complex;cytosol;intracellular non-membrane-bounded organelle;intracellular organelle;intracellular organelle part;intracellular part;macromolecular complex;non-membrane-bounded organelle;nuclear part;nucleolus;nucleoplasm;organelle;organelle part;protein complex;ubiquiti…	3D-structure;Acetylation;Alternativesplicing;Completeproteome;Host-virusinteraction;Isopeptidebond;Phosphoprotein;Polymorphism;Proteomicsidentification;Referenceproteome;Ublconjugation;Ublconjugationpathway	Pathways in cancer;Renal cell carcinoma;Ubiquitin mediated proteolysis		15	15	15	20.7	20.7	20.7	88.505	0	36.424	1808500000	49	0.309521	0.356019	0.569345	A0A0A0MTN0;Q13617;Q13617-2;Q5T2B5;Q5T2B4;Q5T2B7	A0A0A0MTN0;Q13617;Q13617-2;Q5T2B5	Cullin-2	CUL2
1.0062	1.03578	1.04884	1.00806	1.05464	1.07156	1.00897	1.01772	0.995625	0.98976	1.00991	1.09264	1.03892	1.02025	0.992035	1.01168	0.989237	0.985465	1.01179	1.05558	0.950787	0.975241	1.04348	1.01171	biological regulation;cell proliferation;cellular component assembly;cellular component assembly at cellular level;cellular component organization;cellular component organization at cellular level;cellular component organization or biogenesis;cellular component organization or biogenesis at cellular level;cellular macromolecular complex assembly;cellular macromolecular complex subunit organizatio…	binding;carboxylic acid binding;catalytic activity;cation binding;ion binding;iron ion binding;L-ascorbic acid binding;metal ion binding;oxidoreductase activity;oxidoreductase activity, acting on paired donors, with incorporation or reduction of molecular oxygen;oxidoreductase activity, acting on paired donors, with incorporation or reduction of molecular oxygen, 2-oxoglutarate as one donor, and …	cell part;cytoplasm;cytoplasmic part;intracellular membrane-bounded organelle;intracellular non-membrane-bounded organelle;intracellular organelle;intracellular part;macromolecular complex;membrane-bounded organelle;non-membrane-bounded organelle;nucleus;organelle;ribonucleoprotein complex;RNA granule;stress granule	3D-structure;Alternativesplicing;Completeproteome;Cytoplasm;Dioxygenase;Iron;Metal-binding;Nucleus;Oxidoreductase;Polymorphism;Proteomicsidentification;Referenceproteome;VitaminC			10	10	10	19.4	19.4	19.4	58.378	0	23.12	976610000	45	0.0684376	0.390969	0.710458	A0A0A0MTR2;Q8N543;H3BR79;H3BUA6;H3BR02;Q8N543-2;H3BP48	A0A0A0MTR2;Q8N543;H3BR79;H3BUA6	Prolyl 3-hydroxylase OGFOD1	OGFOD1
0.965246	0.995487	0.978881	1.00672	1.03337	1.00796	0.996124	1.0183	1.00427	0.99492	1.03949	1.18	1.02878	1.01546	1.01794	1.03384	0.991272	1.01237	1.00474	0.90692	1.0446	1.04759	0.89517	0.938033	biological regulation;cation homeostasis;cation transport;cellular cation homeostasis;cellular chemical homeostasis;cellular homeostasis;cellular ion homeostasis;cellular iron ion homeostasis;cellular metal ion homeostasis;cellular process;chemical homeostasis;establishment of localization;homeostatic process;ion homeostasis;ion transport;iron ion homeostasis;iron ion transport;metabolic process;…	4 iron, 4 sulfur cluster binding;binding;cation binding;ion binding;iron-responsive element binding;iron-sulfur cluster binding;metal cluster binding;metal ion binding;mRNA binding;nucleic acid binding;RNA binding;translation regulator activity;translation repressor activity	cell part;cytoplasm;intracellular part	4Fe-4S;Alternativesplicing;Completeproteome;Cytoplasm;Iron;Iron-sulfur;Metal-binding;Polymorphism;Proteomicsidentification;Referenceproteome;RNA-binding;Ublconjugation			8	8	8	6.2	6.2	6.2	105.06	0	13.345	2779700000	12	0.481185	0.374992	0.253932	A0A0A6YY96;P48200;H0YNL8;P48200-2	A0A0A6YY96;P48200	Iron-responsive element-binding protein 2	IREB2
0.978981	1.02153	1.04198	1.03196	1.11876	1.11586	1.00007	1.01412	0.996358	0.9854	0.99079	1.03901	1.02305	1.01657	1.00069	1.0083	0.976422	1.00933	1.00918	1.00717	0.989483	1.01369	0.996174	1.00958	biological regulation;cellular process;establishment of localization;establishment of localization in cell;establishment of protein localization;intracellular protein transport;intracellular transport;positive regulation of biological process;positive regulation of catabolic process;positive regulation of macromolecule metabolic process;positive regulation of metabolic process;positive regulation…		AP-type membrane coat adaptor complex;cell part;clathrin adaptor complex;cytoplasmic part;endosomal part;endosome membrane;Golgi apparatus;Golgi apparatus part;intracellular;intracellular membrane-bounded organelle;intracellular organelle;intracellular organelle part;intracellular part;macromolecular complex;membrane;membrane part;membrane-bounded organelle;nuclear part;nucleoplasm;organelle;orga…	3D-structure;Acetylation;Alternativesplicing;Completeproteome;Endosome;Golgiapparatus;Membrane;Phosphoprotein;Polymorphism;Proteintransport;Proteomicsidentification;Referenceproteome;Transport;Ublconjugation	Lysosome		9	9	8	11.6	11.6	10.5	72.277	0	15.282	1417100000	32	0.307421	0.383575	0.703962	A0A0A6YYG1;Q9UJY5-4;Q9UJY5-3;Q9UJY5;Q9UJY5-6;B0QYR6;Q9UJY5-2;B0QYS5;B0QYS3;B0QYR9;B0QYS0;B0QYS1;B0QYS2;B0QYR5;B0QYR8;A0A087WYN2;H3BPI3	A0A0A6YYG1;Q9UJY5-4;Q9UJY5-3;Q9UJY5;Q9UJY5-6;B0QYR6;Q9UJY5-2	ADP-ribosylation factor-binding protein GGA1	GGA1
0.994213	0.997423	1.00545	1.00844	1.05604	1.08636	1.00392	1.0053	1.00181	0.991347	1.00476	0.995779	1.0283	1.0211	1.004	1.01782	0.961173	0.99494	1.00169	0.960911	1.00224	1.02273	1.02756	1.01756	anterograde axon cargo transport;anterograde synaptic vesicle transport;axon cargo transport;biological regulation;cellular component movement;cellular process;cytoskeleton-dependent intracellular transport;directional locomotion;establishment of localization;establishment of localization in cell;establishment of protein localization;intracellular protein transport;intracellular transport;locomot…	protein transporter activity;substrate-specific transporter activity;transporter activity	AP-3 adaptor complex;AP-type membrane coat adaptor complex;cell part;cell projection;cytoplasmic part;cytoplasmic vesicle membrane;cytoplasmic vesicle part;Golgi apparatus;intracellular membrane-bounded organelle;intracellular organelle;intracellular organelle part;intracellular part;lamellipodium;macromolecular complex;membrane;membrane coat;membrane part;membrane-bounded organelle;organelle;org…	Alternativesplicing;Cellprojection;Completeproteome;Cytoplasmicvesicle;Golgiapparatus;Membrane;Proteintransport;Proteomicsidentification;Referenceproteome;Transport	Lysosome		8	8	8	21.1	21.1	21.1	43.881	0	18.807	658990000	17	0.530131	0.887537	0.692961	A0A0A6YYH1;Q7Z6K5-2;Q7Z6K5;H0YMP5;H0YL85;H0YLI7;P59780;H0YL03;H0YMK0	A0A0A6YYH1;Q7Z6K5-2;Q7Z6K5	Arpin	C15orf38-AP3S2;ARPIN
0.927233	0.953437	0.955867	0.981564	1.00754	0.994413	1.00095	1.00732	0.924824	0.910459	1.04949	0.973026	1.05438	0.98877	1.02967	1.0113	1.06528	1.03279	0.982607	0.967572	0.990998	1.00188	0.837284	0.958623	biological regulation;biosynthetic process;cellular biosynthetic process;cellular macromolecule biosynthetic process;cellular macromolecule metabolic process;cellular metabolic process;cellular nitrogen compound metabolic process;cellular process;macromolecule biosynthetic process;macromolecule metabolic process;metabolic process;nitrogen compound metabolic process;nucleic acid metabolic process;…	binding;DNA binding;nucleic acid binding	cell part;cytoplasmic part;endoplasmic reticulum;intracellular membrane-bounded organelle;intracellular organelle;intracellular part;membrane-bounded organelle;nucleus;organelle	Alternativesplicing;Completeproteome;DNA-binding;Nucleus;Referenceproteome;Transcription;Transcriptionregulation			2	2	2	3.5	3.5	3.5	61.297	0.006634	1.3979	1996200000	7	0.828688	0.946505	0.93275	A0A0A6YYH8;Q8N3S3-7;Q8N3S3-4;Q8N3S3-3;Q8N3S3-2;Q8N3S3;Q8N3S3-6;Q8N3S3-5	A0A0A6YYH8;Q8N3S3-7;Q8N3S3-4;Q8N3S3-3;Q8N3S3-2;Q8N3S3;Q8N3S3-6;Q8N3S3-5	Putative homeodomain transcription factor 2	PHTF2
0.984535	1.01907	1.0904	1.02862	1.07124	1.0519	1.02397	1.01021	1.00413	0.998041	1.03616	1.08613	1.04075	1.02808	0.994401	1.0148	0.942728	0.9841	1.01102	0.986901	0.999148	1.00854	0.974393	1.00608			cell part;intracellular membrane-bounded organelle;intracellular non-membrane-bounded organelle;intracellular organelle;intracellular organelle part;intracellular part;membrane-bounded organelle;non-membrane-bounded organelle;nuclear part;nucleolus;nucleus;organelle;organelle part	Acetylation;Alternativesplicing;Completeproteome;Nucleus;Phosphoprotein;Polymorphism;Proteomicsidentification;Referenceproteome			10	10	4	18.5	18.5	7.9	58.199	0	56.323	2514500000	38	0.923915	0.746022	0.506012	A0A0A6YYI3;Q9NQ55-2;Q9NQ55;Q9NQ55-3;A8MV53;C9J3W3	A0A0A6YYI3;Q9NQ55-2;Q9NQ55;Q9NQ55-3;A8MV53	Suppressor of SWI4 1 homolog	PPAN-P2RY11;PPAN
0.982338	1.02246	0.939035	0.990158	1.06288	1.06336	0.99781	1.01516	0.989252	0.960213	0.998598	0.913363	1.02007	1.01926	1.02591	1.01905	1.06687	1.03796	1.00511	0.999588	0.978701	1.00813	0.887675	0.963224				Alternativesplicing;Completeproteome;Phosphoprotein;Polymorphism;Proteomicsidentification;Referenceproteome;Repeat			13	11	11	10.6	9.1	9.1	150.45	0	25.999	670360000	41	0.718645	0.691748	0.968681	A0A0A6YYJ5;O94854;O94854-2	A0A0A6YYJ5;O94854;O94854-2	Uncharacterized protein KIAA0754	MACF1;KIAA0754
0.950495	0.984561	1.00328	1.01463	1.07947	1.10812	1.00833	1.01162	0.994976	0.983846	1.00772	0.983817	1.02561	1.01776	0.996134	1.00555	1.019	1.00556	1.00786	0.997718	0.997273	1.01208	0.924105	0.968085	actin cytoskeleton organization;actin filament organization;actin filament polymerization;actin filament-based process;actin polymerization or depolymerization;biological regulation;cellular component assembly;cellular component assembly at cellular level;cellular component organization;cellular component organization at cellular level;cellular component organization or biogenesis;cellular compon…	actin binding;binding;cytoskeletal protein binding;protein binding	cell part;cytoplasmic membrane-bounded vesicle;cytoplasmic part;cytoplasmic vesicle;cytosol;extrinsic to membrane;extrinsic to mitochondrial inner membrane;extrinsic to organelle membrane;Golgi apparatus;Golgi apparatus part;Golgi membrane;integral to membrane;intracellular membrane-bounded organelle;intracellular organelle;intracellular organelle lumen;intracellular organelle part;intracellular …	Actin-binding;Alternativesplicing;Completeproteome;Cytoplasm;Cytoplasmicvesicle;Golgiapparatus;Isopeptidebond;Membrane;Mitochondrion;Mitochondrioninnermembrane;Phosphoprotein;Polymorphism;Proteintransport;Proteomicsidentification;Referenceproteome;Repeat;Translocation;Transport;Ublconjugation;WDrepeat			14	14	14	13	13	13	114.16	0	26.465	4917100000	49	0.616985	0.537212	0.858007	A0A0A6YYL4;P57737-3;P57737-2;P57737-4;P57737;I3L0X9;I3L3T0;Q9Y3D7;I3L1U7;I3L167;E7EP81;I3L351;I3L359;I3L2Y6;I3L1M1;I3L442;I3NI06;I3L1G9	A0A0A6YYL4;P57737-3;P57737-2;P57737-4;P57737	Coronin;Coronin-7	CORO7-PAM16;CORO7
0.956751	1.01224	1.18003	1.07683	1.10565	1.16522	1.05444	1.04947	1.00558	1.01416	1.3108	1.40542	1.05284	1.03466	0.966169	1.02179	0.952219	0.958505	1.01746	1.00863	1.04355	1.03476	1.05312	0.979458	biological regulation;negative regulation of biological process;negative regulation of biosynthetic process;negative regulation of cellular biosynthetic process;negative regulation of cellular macromolecule biosynthetic process;negative regulation of cellular metabolic process;negative regulation of cellular process;negative regulation of gene expression;negative regulation of macromolecule biosy…	binding;cation binding;ion binding;lipid binding;metal ion binding;phosphatidylinositol binding;phospholipid binding;protein binding transcription factor activity;RNA polymerase II transcription cofactor activity;RNA polymerase II transcription corepressor activity;RNA polymerase II transcription factor binding transcription factor activity;RNA polymerase II transcription factor binding transcrip…	cell part;chromatin remodeling complex;chromosomal part;histone deacetylase complex;intracellular membrane-bounded organelle;intracellular non-membrane-bounded organelle;intracellular organelle;intracellular organelle part;intracellular part;macromolecular complex;membrane-bounded organelle;non-membrane-bounded organelle;nuclear chromosome part;nuclear part;nucleolus;nucleoplasm;nucleoplasm part;…	3D-structure;Alternativesplicing;Completeproteome;Metal-binding;Nucleus;Phosphoprotein;Proteomicsidentification;Referenceproteome;Repeat;Repressor;Transcription;Transcriptionregulation;Zinc;Zinc-finger			1	1	1	4.8	4.8	4.8	28.394	0	13.506	47144000	4	0.140783	0.782213	0.747335	K7EPF7;C9J9G2;A0A0A6YYL7;Q96QT6-4;Q96QT6-2;Q96QT6-5;Q96QT6-3;Q96QT6	K7EPF7;C9J9G2;A0A0A6YYL7;Q96QT6-4;Q96QT6-2;Q96QT6-5;Q96QT6-3;Q96QT6	PHD finger protein 12	PHF12
0.949884	0.997757	1.10051	1.02496	1.10966	1.12431	0.99959	1.00279	1.00942	0.98353	1.00985	1.12362	1.02005	1.01675	0.995353	1.00878	0.907961	0.98562	0.995624	0.948742	1.00946	1.00328	1.00744	1.02531	cell differentiation;cellular developmental process;cellular process;developmental process;hemopoietic progenitor cell differentiation	binding;nucleic acid binding;nucleotide binding;RNA binding	cell part;intracellular membrane-bounded organelle;intracellular organelle;intracellular part;membrane-bounded organelle;nucleus;organelle	3D-structure;Alternativesplicing;Completeproteome;Nucleus;Polymorphism;Proteomicsidentification;Referenceproteome;Repeat;RNA-binding			5	5	5	17.3	17.3	17.3	43.987	0	21.189	199060000	9	0.245947	0.637535	0.241154	D6R9D6;A0AV96-2;A0AV96;D6REZ6;D6RBS9;B7Z8Z7;D6RBP6;D6RA49;D6RFL5;D6R9M7;D6RCT1;D6RF41;Q8TBY0-2;Q8TBY0-3;Q8TBY0	D6R9D6;A0AV96-2;A0AV96;D6REZ6;D6RBS9;B7Z8Z7;D6RBP6;D6RA49;D6RFL5;D6R9M7	RNA-binding protein 47	RBM47
1.00715	1.03557	1.08001	1.04088	1.06707	1.07093	1.00388	1.01459	1.00711	0.999531	1.00239	1.14182	1.01707	1.01062	0.993027	1.00872	0.953506	0.993023	1.01522	1.02502	0.964626	0.984194	1.08795	1.0257	catabolic process;cellular catabolic process;cellular macromolecule catabolic process;cellular macromolecule metabolic process;cellular metabolic process;cellular process;cellular protein metabolic process;macromolecule catabolic process;macromolecule metabolic process;macromolecule modification;metabolic process;modification-dependent macromolecule catabolic process;modification-dependent protei…	adenyl nucleotide binding;adenyl ribonucleotide binding;ATP binding;binding;catalytic activity;FAT10 activating enzyme activity;nucleotide binding;purine nucleotide binding;purine ribonucleoside triphosphate binding;purine ribonucleotide binding;ribonucleotide binding;small protein activating enzyme activity	cell part;cytoplasm;cytoplasmic part;cytosol;intracellular part	Acetylation;Alternativesplicing;ATP-binding;Completeproteome;Ligase;Nucleotide-binding;Polymorphism;Proteomicsidentification;Referenceproteome;Ublconjugationpathway	Ubiquitin mediated proteolysis		34	34	34	34.2	34.2	34.2	117.97	0	160.65	13923000000	214	0.274213	0.483273	0.618927	A0AVT1;A0AVT1-2;A0AVT1-3;H0Y8S8;A0AVT1-4;H0Y9U5	A0AVT1;A0AVT1-2	Ubiquitin-like modifier-activating enzyme 6	UBA6
0.954134	0.980813	1.05625	1.02984	1.07736	1.09787	0.997839	1.00758	0.996656	0.983839	1.0081	1.02124	1.02337	1.01473	1.00531	1.01762	0.957658	1.00172	1.0094	0.980234	1.01181	1.02725	0.967614	1.02852	axon guidance;biological regulation;chemotaxis;locomotion;regulation of biological process;regulation of cellular process;regulation of establishment of cell polarity;regulation of establishment or maintenance of cell polarity;response to chemical stimulus;response to external stimulus;response to stimulus;taxis		axon part;axonal growth cone;cell part;cell projection part;growth cone;site of polarized growth	Acetylation;Alternativesplicing;Cellprojection;Coiledcoil;Completeproteome;Developmentalprotein;Directproteinsequencing;Phosphoprotein;Referenceproteome			25	25	25	42	42	42	71.639	0	111.03	7205300000	117	0.400728	0.534348	0.488947	A0MZ66;A0MZ66-3;A0MZ66-4;A0MZ66-6;A0MZ66-5;A0MZ66-8;A0MZ66-2;A0MZ66-7	A0MZ66;A0MZ66-3;A0MZ66-4;A0MZ66-6;A0MZ66-5;A0MZ66-8;A0MZ66-2	Shootin-1	KIAA1598
0.996651	1.03257	1.11009	1.0307	1.06298	1.04447	1.00253	1.01166	0.998445	0.995109	1.00505	1.09517	1.0238	1.01083	0.992066	1.01144	0.987065	0.985381	0.998074	1.01233	0.967059	0.996642	1.07073	1.00713		binding;catalytic activity;cation binding;coenzyme binding;cofactor binding;ion binding;magnesium ion binding;metal ion binding;thiamine pyrophosphate binding;transferase activity;vitamin binding	cell part;integral to membrane;intrinsic to membrane;membrane;membrane part	Completeproteome;Magnesium;Membrane;Metal-binding;Polymorphism;Proteomicsidentification;Referenceproteome;Thiaminepyrophosphate;Transferase;Transmembrane;Transmembranehelix			7	7	7	17	17	17	56.732	0	47.697	2032300000	46	0.404783	0.868427	0.844166	M0R026;A1L0T0;M0QZX5;M0R1B5;E9PJS0	M0R026;A1L0T0	Acetolactate synthase-like protein	ILVBL
0.97622	1.00621	1.10497	1.05368	1.06589	1.06759	1.00125	1.01	1.00482	1.00285	1.01256	1.14774	1.01572	1.00936	0.990387	1.00936	0.933494	0.985461	1.00495	0.999559	0.987003	1.00658	1.06348	1.02295	acetyl-CoA catabolic process;acetyl-CoA metabolic process;carboxylic acid metabolic process;catabolic process;cellular catabolic process;cellular ketone metabolic process;cellular metabolic process;cellular process;citrate metabolic process;coenzyme catabolic process;coenzyme metabolic process;cofactor catabolic process;cofactor metabolic process;generation of precursor metabolites and energy;iso…	3 iron, 4 sulfur cluster binding;4 iron, 4 sulfur cluster binding;aconitate hydratase activity;binding;carbon-oxygen lyase activity;catalytic activity;cation binding;hydro-lyase activity;ion binding;iron ion binding;iron-sulfur cluster binding;lyase activity;metal cluster binding;metal ion binding;transition metal ion binding	cell part;cytoplasmic part;intracellular membrane-bounded organelle;intracellular organelle;intracellular organelle lumen;intracellular organelle part;intracellular part;membrane-bounded organelle;membrane-enclosed lumen;mitochondrial matrix;mitochondrial part;mitochondrion;nucleus;organelle;organelle lumen;organelle part	4Fe-4S;Acetylation;Completeproteome;Directproteinsequencing;Diseasemutation;Iron;Iron-sulfur;Isopeptidebond;Lyase;Metal-binding;Mitochondrion;Neurodegeneration;Phosphoprotein;Polymorphism;Proteomicsidentification;Pyrrolidonecarboxylicacid;Referenceproteome;Transitpeptide;Tricarboxylicacidcycle;Ublconjugation	Carbon fixation pathways in prokaryotes;Citrate cycle (TCA cycle);Glyoxylate and dicarboxylate metabolism		31	31	31	43.6	43.6	43.6	87.819	0	323.31	13934000000	189	0.338705	0.488634	0.543485	A2A274;Q99798	A2A274;Q99798	Aconitate hydratase, mitochondrial	ACO2
1.01702	1.04758	1.06406	1.03242	1.08218	1.09192	0.992025	1.01321	1.00657	0.992961	1.03119	1.14039	1.02977	1.02191	0.990914	1.00663	0.956861	0.993296	1.01465	1.00487	0.984797	0.99796	1.06917	1.02356	biological regulation;cellular component organization;cellular component organization or biogenesis;cellular process;cellular response to stimulus;intracellular signal transduction;membrane organization;Ral protein signal transduction;Ras protein signal transduction;regulation of biological process;regulation of cellular localization;regulation of cellular process;regulation of exocyst localizati…	binding;enzyme activator activity;enzyme regulator activity;GTPase activator activity;GTPase regulator activity;nucleoside-triphosphatase regulator activity;protein binding;protein dimerization activity;protein heterodimerization activity		Alternativesplicing;Completeproteome;GTPaseactivation;Phosphoprotein;Proteomicsidentification;Referenceproteome			5	5	5	3.3	3.3	3.3	147.39	0	8.3818	299030000	11	0.127524	0.510428	0.558655	A2A2F0;Q86X10-2;Q86X10-3;Q86X10;Q86X10-4	A2A2F0;Q86X10-2;Q86X10-3;Q86X10	Ral GTPase-activating protein subunit beta	RALGAPB
0.962684	1.00692	0.998589	1.01406	1.14891	1.19259	1.00662	1.02106	0.999671	0.990091	0.98391	0.970473	1.01484	0.999531	0.97545	1.01298	1.02727	1.05107	1.03216	1.02214	1.00329	1.00846	0.945109	1.01035	androgen receptor signaling pathway;biological regulation;cell surface receptor linked signaling pathway;cellular process;cellular response to stimulus;enzyme linked receptor protein signaling pathway;intracellular receptor mediated signaling pathway;negative regulation of biological process;negative regulation of cell communication;negative regulation of cell development;negative regulation of c…	binding;protein binding;protein domain specific binding;R-SMAD binding;SMAD binding;WW domain binding	cell part;cytoplasmic part;early endosome membrane;endosomal part;endosome membrane;Golgi apparatus part;Golgi membrane;integral to membrane;intracellular organelle part;intracellular part;intrinsic to membrane;membrane;membrane part;organelle membrane;organelle part;plasma membrane	Alternativesplicing;Completeproteome;Disulfidebond;Endosome;Golgiapparatus;Membrane;Polymorphism;Proteomicsidentification;Referenceproteome;Repeat;Signaltransductioninhibitor;Transmembrane;Transmembranehelix;Ublconjugationpathway			4	4	4	25.5	25.5	25.5	22.952	0	17.047	382560000	14	0.276878	0.446221	0.785108	A2A2F4;Q969W9-3;Q969W9-2;Q969W9;A2A2F5;O15165-8;O15165-5;O15165-4;O15165-3;O15165-7;O15165-6;O15165-2;O15165	A2A2F4;Q969W9-3;Q969W9-2;Q969W9	Protein TMEPAI	PMEPA1
0.990259	1.03473	1.11442	1.03791	1.11252	1.11322	1.00558	1.01383	1.00991	1.01413	0.993055	1.11079	1.02171	1.0103	0.982263	1.00723	0.941102	1.01174	1.0007	1.0305	0.973655	0.990921	1.13305	1.01999				Acetylation;Completeproteome;Polymorphism;Proteomicsidentification;Referenceproteome			6	6	5	19.6	19.6	16.6	45.034	0	21.516	620600000	23	0.20523	0.625491	0.745099	A2A2Q9;Q9Y312	A2A2Q9;Q9Y312	Protein AAR2 homolog	AAR2
0.976935	1.0142	1.00985	1.00723	1.05156	1.09321	1.00508	1.01694	0.988372	0.971372	1.00082	0.913559	1.02689	0.999455	1.01978	1.01248	1.16685	1.06349	1.02197	1.02058	1.00502	1.0212	0.944849	1.00317	axon guidance;behavior;biological regulation;cation homeostasis;cell cycle arrest;cell cycle process;cellular cation homeostasis;cellular chemical homeostasis;cellular component assembly;cellular component organization;cellular component organization or biogenesis;cellular copper ion homeostasis;cellular homeostasis;cellular ion homeostasis;cellular process;cellular response to chemical stimulus;…	binding;cation binding;copper ion binding;cytoskeletal protein binding;identical protein binding;ion binding;metal ion binding;microtubule binding;protein binding;transition metal ion binding;tubulin binding	anchored to membrane;cell part;cell surface;cytoplasm;cytoplasmic part;endoplasmic reticulum;extracellular membrane-bounded organelle;extracellular organelle;extracellular region part;extracellular vesicular exosome;extrinsic to membrane;Golgi apparatus;intracellular membrane-bounded organelle;intracellular organelle;intracellular part;intrinsic to membrane;membrane;membrane part;membrane raft;me…	3D-structure;Alternativeinitiation;Amyloid;Amyloidosis;Cellcycle;Cellmembrane;Completeproteome;Copper;Cytoplasm;Directproteinsequencing;Diseasemutation;Disulfidebond;Glycoprotein;Golgiapparatus;GPI-anchor;Growtharrest;Lipoprotein;Membrane;Metal-binding;Nucleus;Polymorphism;Prion;Proteomicsidentification;Referenceproteome;Repeat;Signal;Ublconjugation;Zinc	Prion diseases		3	3	3	11.6	11.6	11.6	27.278	0	33.247	3037700000	36	0.560083	0.79198	0.917636	A2A2V1;P04156-2;P04156;X6RKS3	A2A2V1;P04156-2;P04156	Major prion protein	PRNP
0.932618	1.00346	1.1454	1.03687	1.12268	1.10616	1.00843	1.00376	0.995369	0.968691	1.02688	1.00015	1.02717	1.03937	0.993861	1.02021	0.979693	0.988119	1.03347	0.973214	1.06614	1.0746	0.97219	0.998332	biosynthetic process;cellular biosynthetic process;cellular component disassembly;cellular component disassembly at cellular level;cellular component organization;cellular component organization at cellular level;cellular component organization or biogenesis;cellular component organization or biogenesis at cellular level;cellular macromolecular complex disassembly;cellular macromolecular complex …	structural constituent of ribosome;structural molecule activity	cell part;cytoplasm;cytoplasmic part;intracellular membrane-bounded organelle;intracellular non-membrane-bounded organelle;intracellular organelle;intracellular organelle part;intracellular part;macromolecular complex;membrane;membrane-bounded organelle;mitochondrial inner membrane;mitochondrial membrane;mitochondrial part;mitochondrial ribosome;mitochondrion;non-membrane-bounded organelle;nuclea…	Completeproteome;Mitochondrion;Polymorphism;Proteomicsidentification;Referenceproteome;Ribonucleoprotein;Ribosomalprotein;Transitpeptide			5	5	5	25	25	25	28.506	0	12.39	320350000	13	0.450891	0.805523	0.825734	A2IDC6;Q13084;A2IDC7;Q4TT37;Q4TT38	A2IDC6;Q13084;A2IDC7;Q4TT37;Q4TT38	39S ribosomal protein L28, mitochondrial	MRPL28
0.968754	1.01087	1.00067	1.01877	1.09965	1.12068	0.995977	1.0115	1.0271	1.01944	1.01502	1.14637	1.02626	1.02066	0.983375	1.00762	0.9065	0.97718	1.00987	1.04952	0.944375	0.972122	1.14417	1.06194	biological regulation;catabolic process;cellular catabolic process;cellular macromolecule catabolic process;cellular macromolecule metabolic process;cellular metabolic process;cellular nitrogen compound metabolic process;cellular process;establishment of localization;establishment of localization in cell;Golgi vesicle transport;intracellular transport;macromolecule catabolic process;macromolecule…		cell part;cytoplasm;cytoplasmic part;Golgi apparatus;intracellular membrane-bounded organelle;intracellular non-membrane-bounded organelle;intracellular organelle;intracellular organelle part;intracellular part;membrane;membrane-bounded organelle;non-membrane-bounded organelle;nuclear membrane;nuclear part;nucleolus;organelle;organelle membrane;organelle part	Acetylation;Alternativesplicing;Completeproteome;Cytoplasm;Diseasemutation;Dwarfism;Phosphoprotein;Polymorphism;Proteomicsidentification;Referenceproteome;Repeat;WDrepeat			7	7	7	3	3	3	268.57	0	13.736	157470000	16	0.13436	0.374611	0.908426	A2RRP1;A2RRP1-2;H0Y5G7;H7C1U4;H7C007;H7BZU5	A2RRP1;A2RRP1-2	Neuroblastoma-amplified sequence	NBAS
1.00781	1.04252	1.01178	1.00215	1.0662	1.04994	1.01103	1.01612	0.994592	0.991453	1.03359	1.02894	1.03071	1.01495	1.00091	1.00401	0.972078	1.00625	1.00918	1.02807	0.958561	0.978986	1.02106	0.981238	actin filament severing;actin filament-based process;anatomical structure development;anatomical structure morphogenesis;axon guidance;biological adhesion;biological regulation;cell adhesion;cell morphogenesis;cell morphogenesis involved in differentiation;cell part morphogenesis;cell projection assembly;cell projection morphogenesis;cell projection organization;cell-substrate adhesion;cellular c…	binding;enzyme activator activity;enzyme binding;enzyme regulator activity;GTPase activator activity;GTPase binding;GTPase regulator activity;identical protein binding;nucleoside-triphosphatase regulator activity;protein binding;protein dimerization activity;protein heterodimerization activity;protein homodimerization activity;Rac GTPase binding;Ras GTPase binding;Rho GTPase binding;small GTPase …	cell junction;cell part;cell projection;cell projection part;cytoplasm;cytoplasmic membrane-bounded vesicle;cytoplasmic part;cytoplasmic vesicle;cytoskeletal part;cytosol;dendritic spine head;endocytic vesicle;intracellular;intracellular membrane-bounded organelle;intracellular organelle;intracellular organelle part;intracellular part;lamellipodium;membrane;membrane-bounded organelle;membrane-bou…	3D-structure;Celljunction;Cellmembrane;Cellprojection;Chromosomalrearrangement;Coiledcoil;Completeproteome;Cytoplasm;Cytoplasmicvesicle;GTPaseactivation;Membrane;Methylation;Neurogenesis;Nucleus;Phosphoprotein;Polymorphism;Postsynapticcellmembrane;Proteomicsidentification;Referenceproteome;SH3domain;Synapse	Axon guidance		15	15	14	15.9	15.9	14.8	120.74	0	38.136	593230000	25	0.0221831	0.591678	0.925672	B7ZM87;A2RUF3;O75044;A0A075B7B5;P0DMP2;Q5VZB4;P0DJJ0;E9PDX4;A0A087WW56;A0A075B7C8;A0A075B743;A0A087X0L1;A0A075B7E6;A0A075B7E9	B7ZM87;A2RUF3;O75044;A0A075B7B5	SLIT-ROBO Rho GTPase-activating protein 2	SRGAP2
1.03115	1.06564	1.06125	1.044	1.05321	1.06642	1.01952	1.0206	0.980877	0.987669	1.07297	1.10421	1.02537	1.00254	0.970825	1.00693	0.854245	1.01273	1.00222	1.00213	0.965952	0.998437	1.00393	0.984432	biological regulation;catabolic process;cellular catabolic process;cellular localization;cellular macromolecule catabolic process;cellular macromolecule localization;cellular macromolecule metabolic process;cellular metabolic process;cellular nitrogen compound metabolic process;cellular process;cleavage involved in rRNA processing;CUT catabolic process;CUT metabolic process;exonucleolytic nuclear…	3'-5' exonuclease activity;3'-5'-exoribonuclease activity;7S RNA binding;binding;catalytic activity;exonuclease activity;exonuclease activity, active with either ribo- or deoxyribonucleic acids and producing 5'-phosphomonoesters;exoribonuclease activity;exoribonuclease activity, producing 5'-phosphomonoesters;hydrolase activity;hydrolase activity, acting on ester bonds;nuclease activity;nucleic a…	cell part;cytoplasm;cytoplasmic exosome (RNase complex);cytoplasmic part;cytosol;exosome (RNase complex);intracellular membrane-bounded organelle;intracellular non-membrane-bounded organelle;intracellular organelle;intracellular organelle part;intracellular part;macromolecular complex;membrane-bounded organelle;non-membrane-bounded organelle;nuclear exosome (RNase complex);nuclear part;nucleolus;…	3D-structure;Alternativesplicing;Completeproteome;Cytoplasm;Exosome;Nucleus;Phosphoprotein;Proteomicsidentification;Referenceproteome;RNA-binding;rRNAprocessing	RNA degradation		3	3	3	16.5	16.5	16.5	22.077	0	6.1142	261470000	6	0.661957	0.261026	0.486832	A3KFL1;A3KFL5;A3KFL2;Q13868-2;Q13868;A3KFL4	A3KFL1;A3KFL5;A3KFL2;Q13868-2;Q13868;A3KFL4	Exosome complex component RRP4	EXOSC2
0.985905	1.03809	1.06491	1.01931	1.09464	1.0795	1.00728	1.00219	0.998556	0.984122	1.04089	1.05984	1.01826	1.01553	0.999851	1.01321	0.959412	0.985733	0.998691	0.956405	1.01904	1.03207	1.03496	1.02205		adenyl nucleotide binding;adenyl ribonucleotide binding;ATP binding;ATPase activity;binding;catalytic activity;hydrolase activity;hydrolase activity, acting on acid anhydrides;hydrolase activity, acting on acid anhydrides, in phosphorus-containing anhydrides;nucleoside-triphosphatase activity;nucleotide binding;purine nucleotide binding;purine ribonucleoside triphosphate binding;purine ribonucleo…	cell part;cytoplasmic part;extracellular region;intracellular membrane-bounded organelle;intracellular organelle;intracellular part;membrane-bounded organelle;mitochondrion;organelle	Alternativesplicing;ATP-binding;Completeproteome;Glycoprotein;Nucleotide-binding;Polymorphism;Referenceproteome;Secreted;Signal			12	12	12	6	6	6	210.92	0	20.047	531190000	25	0.228848	0.915943	0.892204	A3KMH1-3;A3KMH1;A3KMH1-2	A3KMH1-3;A3KMH1;A3KMH1-2	von Willebrand factor A domain-containing protein 8	VWA8
0.975676	1.02727	1.09054	1.04413	1.07938	1.101	1.00641	1.01389	1.00862	1.00049	1.00581	1.13724	1.02512	1.01318	0.988597	1.00935	0.912496	0.984479	1.00292	1.02959	0.955467	0.990618	1.03137	0.98512	biological regulation;regulation of biological process;regulation of biosynthetic process;regulation of cellular biosynthetic process;regulation of cellular macromolecule biosynthetic process;regulation of cellular metabolic process;regulation of cellular process;regulation of gene expression;regulation of macromolecule biosynthetic process;regulation of macromolecule metabolic process;regulation…			Acetylation;Alternativesplicing;Coiledcoil;Completeproteome;Phosphoprotein;Polymorphism;Referenceproteome			11	11	8	9.6	9.6	7.4	154.06	0	77.993	607980000	30	0.550345	0.235504	0.421364	A3KN83-3;A3KN83-2;A3KN83;A3KN83-4	A3KN83-3;A3KN83-2;A3KN83;A3KN83-4	Protein strawberry notch homolog 1	SBNO1
0.961039	1.00281	1.09743	1.03634	1.0748	1.06718	1.00653	1.01684	0.97893	0.990744	1.00346	1.06437	1.033	1.02946	0.981403	1.00508	0.891019	0.9624	0.992464	1.00247	0.967833	0.990868	1.17554	1.06487	cellular component biogenesis;cellular component biogenesis at cellular level;cellular component organization or biogenesis;cellular component organization or biogenesis at cellular level;cellular process;ribonucleoprotein complex biogenesis;ribosome biogenesis	binding;catalytic activity;cation binding;GTP binding;GTPase activity;guanyl nucleotide binding;guanyl ribonucleotide binding;hydrolase activity;hydrolase activity, acting on acid anhydrides;hydrolase activity, acting on acid anhydrides, in phosphorus-containing anhydrides;ion binding;magnesium ion binding;metal ion binding;nucleoside-triphosphatase activity;nucleotide binding;purine nucleotide b…	cell part;chromosome;cytoplasmic part;intracellular membrane-bounded organelle;intracellular non-membrane-bounded organelle;intracellular organelle;intracellular organelle part;intracellular part;membrane-bounded organelle;mitochondrion;non-membrane-bounded organelle;nuclear part;nucleolus;organelle;organelle part	Alternativesplicing;Chromosome;Completeproteome;GTP-binding;Nucleotide-binding;Nucleus;Polymorphism;Proteomicsidentification;Referenceproteome;Ribosomebiogenesis			6	6	6	19.1	19.1	19.1	42.932	0	33.678	838820000	25	0.613759	0.948496	0.94744	A4D1E9;C9J8R7;C9JNI1;A4D1E9-2;C9JEQ8;F8WBY0;F8WCN4;F8WBB5;A4D1E9-3	A4D1E9;C9J8R7;C9JNI1;A4D1E9-2;C9JEQ8	GTP-binding protein 10	GTPBP10
0.931848	0.956515	0.939672	0.975529	1.03211	1.05132	1.01254	1.01691	0.988361	0.946965	1.0117	0.916234	1.04997	1.03709	1.0119	1.00771	1.10138	1.02497	1.00123	0.961902	1.02627	1.04212	0.869217	0.979718	actin cytoskeleton organization;actin filament organization;actin filament-based process;biological regulation;calcium-mediated signaling;cell projection organization;cellular component organization;cellular component organization at cellular level;cellular component organization or biogenesis;cellular component organization or biogenesis at cellular level;cellular process;cellular response to st…		cell cortex part;cell junction;cell part;cell projection;cell projection part;cortical actin cytoskeleton;cortical cytoskeleton;cytoplasmic part;cytoskeletal part;cytoskeleton;dendritic spine;filopodium;growth cone;intracellular non-membrane-bounded organelle;intracellular organelle;intracellular organelle part;intracellular part;neuron projection;neuron spine;non-membrane-bounded organelle;organ…	3D-structure;Actin-binding;Alternativesplicing;Celljunction;Coiledcoil;Completeproteome;Cytoplasm;Cytoskeleton;Developmentalprotein;Differentiation;Neurogenesis;Phosphoprotein;Polymorphism;Proteomicsidentification;Referenceproteome;Synapse;Synaptosome			9	7	7	7.3	6	6	148.2	0	25.856	270450000	15	0.961145	0.882771	0.989655	A4D1I0;Q9ULJ8;Q9ULJ8-5;Q9ULJ8-3;Q9ULJ8-4;Q9ULJ8-2	A4D1I0;Q9ULJ8;Q9ULJ8-5;Q9ULJ8-3;Q9ULJ8-4	Neurabin-1	PPP1R9A
0.938592	0.9787	1.04307	1.01933	0.992881	0.976884	1.01029	1.00724	0.992302	0.980513	1.03756	0.970451	1.04554	1.03463	0.998958	1.01548	1.06155	1.00127	1.02769	0.992322	1.00305	1.02369	0.87278	0.938008				Completeproteome;Proteomicsidentification;Referenceproteome			2	2	2	4.8	4.8	4.8	51.445	0	11.427	229530000	10	0.614715	0.915396	0.979255	A4D1U4;C9J7X6	A4D1U4;C9J7X6	Protein LCHN	LCHN;KIAA1147
0.948942	1.00016	1.21454	1.0342	1.14861	1.16994	1.00717	0.99374	0.985805	0.962365	1.02295	1.10804	1.02112	1.01307	0.986569	1.00011	1.01357	1.03346	1.02691	0.991622	0.91525	0.991741	1.13906	1.10293	cellular macromolecule metabolic process;cellular metabolic process;cellular nitrogen compound metabolic process;cellular process;cellular response to stimulus;cellular response to stress;DNA metabolic process;DNA recombination;DNA repair;double-strand break repair;double-strand break repair via homologous recombination;endosome transport;establishment of localization;establishment of localizatio…	binding;DNA binding;nucleic acid binding;nucleic acid binding transcription factor activity;sequence-specific DNA binding;sequence-specific DNA binding transcription factor activity	AP-type membrane coat adaptor complex;cell part;cytoplasm;cytoplasmic part;intracellular membrane-bounded organelle;intracellular organelle;intracellular organelle part;intracellular part;macromolecular complex;membrane part;membrane-bounded organelle;nuclear part;nucleoplasm;nucleus;organelle;organelle part;protein complex	Alternativesplicing;Completeproteome;Cytoplasm;DNAdamage;DNArepair;Hereditaryspasticparaplegia;Neurodegeneration;Nucleus;Polymorphism;Proteintransport;Proteomicsidentification;Referenceproteome;Transport			7	2	2	4.5	1.1	1.1	164.67	0.0056367	1.4221	33510000	7	0.0478547	0.767854	0.770084	A4D1Z4;O43299;U3KQ26;O43299-2	A4D1Z4		KIAA0415
0.997837	1.01424	1.04939	1.0144	1.21477	1.20522	1.02193	1.05172	1.00009	0.969629	0.99239	1.00845	1.02497	1.00885	0.999419	1.01884	0.954065	0.963885	0.998338	1.04331	0.956178	0.97135	0.966583	0.967173	cellular component assembly;cellular component assembly at cellular level;cellular component organization;cellular component organization at cellular level;cellular component organization or biogenesis;cellular component organization or biogenesis at cellular level;cellular process;cellular process involved in reproduction;endosome transport;establishment of localization;establishment of localiza…	binding;calcium-dependent protein binding;protein binding	cell part;cytoplasmic part;endosomal part;endosome membrane;ESCRT I complex;extracellular membrane-bounded organelle;extracellular organelle;extracellular region part;extracellular vesicular exosome;intracellular organelle part;intracellular part;late endosome membrane;macromolecular complex;membrane;membrane part;membrane-bounded organelle;membrane-bounded vesicle;organelle;organelle membrane;or…	Completeproteome;Endosome;Membrane;Polymorphism;Proteintransport;Proteomicsidentification;Referenceproteome;Transport	Endocytosis		3	3	3	21.6	21.6	21.6	17.143	0	5.4767	224160000	6	0.473525	0.744686	0.881677	F5H4Q5;A5D8V6	F5H4Q5;A5D8V6	Vacuolar protein sorting-associated protein 37C	VPS37C
0.995797	1.03032	1.07881	1.03261	1.08489	1.0814	1.00037	1.01419	1.00527	0.999684	1.01069	1.10287	1.01558	1.01092	0.985908	1.0086	0.956977	0.984547	1.01305	1.0423	0.957305	0.983741	1.07111	1.00873	biological regulation;biosynthetic process;catabolic process;cellular biosynthetic process;cellular catabolic process;cellular macromolecule biosynthetic process;cellular macromolecule catabolic process;cellular macromolecule metabolic process;cellular metabolic process;cellular nitrogen compound metabolic process;cellular process;developmental process;gene expression;gene silencing;gene silencin…	armadillo repeat domain binding;binding;estrogen receptor binding;hormone receptor binding;nuclear hormone receptor binding;protein binding;protein complex scaffold;protein domain specific binding;receptor binding;retinoic acid receptor binding;steroid hormone receptor binding;structural molecule activity;transcription factor binding	CCR4-NOT complex;cell part;cytoplasmic mRNA processing body;cytoplasmic part;cytosol;extracellular region part;extracellular space;intracellular membrane-bounded organelle;intracellular non-membrane-bounded organelle;intracellular organelle;intracellular organelle part;intracellular part;macromolecular complex;membrane;membrane-bounded organelle;microbody;microbody membrane;microbody part;non-mem…	3D-structure;Alternativesplicing;Completeproteome;Cytoplasm;Developmentalprotein;Nucleus;Polymorphism;Proteomicsidentification;Referenceproteome;Repressor;RNA-mediatedgenesilencing;Transcription;Transcriptionregulation;Translationregulation	RNA degradation		32	32	32	13.7	13.7	13.7	266.94	0	85.333	3195100000	112	0.25708	0.499085	0.811492	A5YKK6;A5YKK6-2;A5YKK6-3;A5YKK6-4;B5MDN3;H3BVC9;H3BMZ2;H3BT18;H3BU44;H3BNB1;H3BR89;H3BMH0	A5YKK6;A5YKK6-2;A5YKK6-3;A5YKK6-4	CCR4-NOT transcription complex subunit 1	CNOT1
0.95672	1.01075	1.1066	1.07141	1.17641	1.17069	1.03403	1.01171	0.995349	0.964949	1.02707	1.05037	1.0309	1.02461	1.00202	1.02566	1.04135	1.01352	1.00179	1.0102	0.968754	0.99314	1.07494	1.0405	autophagic vacuole assembly;autophagy;catabolic process;cell communication;cellular catabolic process;cellular component assembly;cellular component assembly at cellular level;cellular component organization;cellular component organization at cellular level;cellular component organization or biogenesis;cellular component organization or biogenesis at cellular level;cellular metabolic process;cell…	binding;cytoskeletal protein binding;lipid binding;microtubule binding;phosphatidylethanolamine binding;phospholipid binding;protein binding;tubulin binding	autophagic vacuole;autophagic vacuole membrane;axoneme;cell part;cell projection part;cytoplasmic part;cytoplasmic vesicle;cytoskeletal part;cytosol;endomembrane system;endosome;extrinsic to membrane;intracellular;intracellular membrane-bounded organelle;intracellular organelle;intracellular organelle part;intracellular part;late endosome;macromolecular complex;membrane;membrane part;membrane-bou…	3D-structure;Alternativesplicing;Autophagy;Completeproteome;Cytoplasm;Cytoplasmicvesicle;Cytoskeleton;Lipoprotein;Membrane;Microtubule;Phosphoprotein;Referenceproteome;Ublconjugationpathway			5	5	5	64	64	64	9.0115	0	6.3515	729250000	12	0.0443147	0.890459	0.953084	H3BTL1;Q9GZQ8;A6NCE7;H3BTE7;Q9H492;Q9H492-2	H3BTL1;Q9GZQ8;A6NCE7	Microtubule-associated proteins 1A/1B light chain 3B;Microtubule-associated proteins 1A/1B light chain 3 beta 2	MAP1LC3B;MAP1LC3B2
0.974353	1.00135	1.04749	1.03751	1.0746	1.10071	1.00503	1.02728	0.995258	0.973519	1.04021	1.03776	1.00957	1.03035	0.992418	1.01261	1.01147	1.02837	1.03783	0.917034	1.07199	1.0822	1.03386	1.09866	biological regulation;BMP signaling pathway;cell surface receptor linked signaling pathway;cellular process;cellular response to stimulus;enzyme linked receptor protein signaling pathway;regulation of biological process;regulation of cellular process;response to stimulus;signal transduction;transmembrane receptor protein serine/threonine kinase signaling pathway		cell part;cytoplasmic part;cytosol;intracellular membrane-bounded organelle;intracellular organelle;intracellular part;membrane-bounded organelle;nucleus;organelle	Acetylation;Alternativesplicing;Completeproteome;Cytoplasm;Nucleus;Phosphoprotein;Polymorphism;Proteomicsidentification;Referenceproteome			5	5	5	6.8	6.8	6.8	90.834	0	8.0432	355200000	8	0.102311	0.909624	0.78557	A6ND36;A6ND36-2;K7EKG0	A6ND36;A6ND36-2	Protein FAM83G	FAM83G
1.00462	1.02442	1.0141	0.994389	1.04608	1.03958	1.00857	1.01548	1.00653	0.994362	1.02956	1.01473	1.03692	1.02376	0.997917	1.02356	1.02039	1.00055	1.02111	0.999376	0.985749	1.00126	0.960914	0.989267	carbohydrate metabolic process;cellular macromolecule metabolic process;cellular metabolic process;cellular process;cellular protein metabolic process;dephosphorylation;macromolecule metabolic process;macromolecule modification;metabolic process;peptidyl-tyrosine dephosphorylation;phosphate-containing compound metabolic process;phosphorus metabolic process;primary metabolic process;protein dephos…	binding;catalytic activity;cation binding;hydrolase activity;hydrolase activity, acting on ester bonds;ion binding;magnesium ion binding;metal ion binding;phosphatase activity;phosphoglycolate phosphatase activity;phosphoprotein phosphatase activity;phosphoric ester hydrolase activity;protein tyrosine phosphatase activity		Carbohydratemetabolism;Completeproteome;Hydrolase;Magnesium;Metal-binding;Proteinphosphatase;Proteomicsidentification;Referenceproteome	Glyoxylate and dicarboxylate metabolism		11	11	11	31.8	31.8	31.8	34.006	0	26.604	2015200000	50	0.30342	0.915266	0.954423	A6NDG6;H3BV17	A6NDG6	Phosphoglycolate phosphatase	PGP
0.984592	1.01512	1.0439	1.02015	1.08922	1.13078	1.0064	1.01866	1.00814	0.999025	1.0122	1.06851	1.03006	1.01684	0.995226	1.00746	0.894427	0.963798	1.03302	1.00851	0.964343	0.992206	0.985038	1.012				Acetylation;Completeproteome;Polymorphism;Referenceproteome			6	6	6	15	15	15	33.62	0	11.915	830150000	13	0.792062	0.379168	0.435825	A6NDU8	A6NDU8	UPF0600 protein C5orf51	C5orf51
0.981724	1.01389	1.03849	1.01847	1.07431	1.07647	1.0055	1.01197	1.00227	0.989256	1.0104	1.05942	1.01983	1.0137	0.997885	1.01118	0.991063	1.00351	1.00303	1.01061	0.978075	0.996125	1.00025	0.996042	biological regulation;biosynthetic process;cell cycle;cellular biosynthetic process;cellular component organization;cellular component organization at cellular level;cellular component organization or biogenesis;cellular component organization or biogenesis at cellular level;cellular macromolecule biosynthetic process;cellular macromolecule metabolic process;cellular metabolic process;cellular ni…	binding;chromatin binding;identical protein binding;nucleic acid binding transcription factor activity;protein binding;protein binding transcription factor activity;sequence-specific DNA binding transcription factor activity;transcription coactivator activity;transcription cofactor activity;transcription factor binding transcription factor activity	cell body;cell part;chromatin remodeling complex;cytoplasm;cytoplasmic part;histone acetyltransferase complex;histone methyltransferase complex;intracellular membrane-bounded organelle;intracellular organelle;intracellular organelle part;intracellular part;macromolecular complex;membrane;membrane-bounded organelle;methyltransferase complex;mitochondrion;MLL1 complex;MLL5-L complex;neuronal cell b…	3D-structure;Acetylation;Alternativesplicing;Autocatalyticcleavage;Cellcycle;Chromatinregulator;Completeproteome;Cytoplasm;Directproteinsequencing;Diseasemutation;Glycoprotein;Host-virusinteraction;Isopeptidebond;Kelchrepeat;Mentalretardation;Nucleus;Phosphoprotein;Polymorphism;Proteomicsidentification;Referenceproteome;Repeat;Ublconjugation			39	39	3	21.1	21.1	1.9	213.47	0	216.2	11813000000	250	0.108229	0.344289	0.555815	A6NEM2;P51610-4;P51610-3;Q9Y5Z7	A6NEM2;P51610-4	Host cell factor 1;HCF N-terminal chain 1;HCF N-terminal chain 2;HCF N-terminal chain 3;HCF N-terminal chain 4;HCF N-terminal chain 5;HCF N-terminal chain 6;HCF C-terminal chain 1;HCF C-terminal chain 2;HCF C-terminal chain 3;HCF C-terminal chain 4;HCF C-terminal chain 5;HCF C-terminal chain 6	HCFC1
0.972264	1.0001	1.08634	1.0457	1.05935	1.07216	1.00397	1.01127	1.0029	0.990859	1.00787	1.09168	1.01295	1.01021	0.990559	1.01297	0.96806	0.986834	1.014	1.00029	0.970801	0.997038	1.03599	1.01618	alcohol catabolic process;alcohol metabolic process;carbohydrate catabolic process;carbohydrate metabolic process;catabolic process;cellular carbohydrate catabolic process;cellular carbohydrate metabolic process;cellular catabolic process;cellular metabolic process;cellular nitrogen compound catabolic process;cellular nitrogen compound metabolic process;cellular process;D-ribose catabolic process…	ADP-ribose diphosphatase activity;ADP-sugar diphosphatase activity;binding;catalytic activity;cation binding;hydrolase activity;hydrolase activity, acting on acid anhydrides;hydrolase activity, acting on acid anhydrides, in phosphorus-containing anhydrides;ion binding;magnesium ion binding;metal ion binding;nucleic acid binding;nucleoside-diphosphatase activity;pyrophosphatase activity;RNA bindin…	cell part;cytoplasmic part;cytosol;extracellular membrane-bounded organelle;extracellular organelle;extracellular region part;extracellular vesicular exosome;intracellular;intracellular membrane-bounded organelle;intracellular organelle;intracellular part;membrane-bounded organelle;membrane-bounded vesicle;nucleus;organelle;vesicle	3D-structure;Acetylation;Completeproteome;Hydrolase;Magnesium;Metal-binding;Phosphoprotein;Polymorphism;Proteomicsidentification;Referenceproteome;RNA-binding	Purine metabolism		7	7	7	34.9	34.9	34.9	25.895	0	67.165	4845600000	84	0.316091	0.532376	0.639804	A6NFX8;Q9UKK9;A6NJU6;A6NCQ0;C9JYY9;H0YEY4	A6NFX8;Q9UKK9;A6NJU6;A6NCQ0;C9JYY9	ADP-sugar pyrophosphatase	NUDT5
1.0149	1.05143	1.05855	1.0249	1.09693	1.17181	0.997497	1.01635	1.01863	1.00315	1.02785	1.2724	1.00354	0.996458	0.999233	1.02672	0.83249	0.974015	1.0271	1.03946	0.948701	0.978636	1.12638	1.03658	biological regulation;cellular process;cellular response to chemical stimulus;cellular response to endogenous stimulus;cellular response to estrogen stimulus;cellular response to hormone stimulus;cellular response to organic substance;cellular response to steroid hormone stimulus;cellular response to stimulus;establishment of localization;establishment of protein localization;positive regulation …	binding;chromatin binding;chromatin DNA binding;core promoter binding;core promoter sequence-specific DNA binding;DNA binding;nucleic acid binding;protein binding transcription factor activity;regulatory region DNA binding;regulatory region nucleic acid binding;RNA polymerase II core promoter sequence-specific DNA binding;RNA polymerase II regulatory region DNA binding;RNA polymerase II regulator…	cell part;chromatin;chromosomal part;intracellular organelle part;intracellular part;nuclear chromatin;nuclear chromosome part;nuclear part;organelle part	Completeproteome;Proteomicsidentification;Referenceproteome;Repeat			5	5	5	28.7	28.7	28.7	18.224	0	11.903	628310000	18	0.283566	0.272572	0.33823	K7EIJ0;K7ENL2;A6NG10;K7EMC9;Q969T9;K7EIN1;K7ESN4;B4DFG2;K7EIK1	K7EIJ0;K7ENL2;A6NG10;K7EMC9;Q969T9;K7EIN1;K7ESN4;B4DFG2	WW domain-binding protein 2	WBP2
0.962507	0.993982	0.988598	0.979945	1.04915	1.08517	1.01673	1.02455	0.996486	0.978545	1.07187	0.965107	1.02904	1.01979	1.0024	1.01182	1.0036	1.00484	1.01548	1.00859	1.00671	1.02766	0.918243	0.972976	biological regulation;biosynthetic process;cellular biosynthetic process;cellular component organization;cellular component organization at cellular level;cellular component organization or biogenesis;cellular component organization or biogenesis at cellular level;cellular macromolecule biosynthetic process;cellular macromolecule metabolic process;cellular metabolic process;cellular nitrogen comp…	binding;cation binding;DNA binding;enzyme binding;ion binding;metal ion binding;nucleic acid binding;protein binding;transition metal ion binding;ubiquitin conjugating enzyme binding;zinc ion binding	cell part;cytoplasmic part;cytosol;intracellular membrane-bounded organelle;intracellular organelle;intracellular organelle part;intracellular part;membrane-bounded organelle;nuclear body;nuclear part;nucleoplasm part;nucleus;organelle;organelle part;PML body	3D-structure;Alternativesplicing;Chromosomalrearrangement;Completeproteome;Metal-binding;Nucleus;Phosphoprotein;Polymorphism;Proteomicsidentification;Referenceproteome;Repeat;Transcription;Transcriptionregulation;Zinc;Zinc-finger			11	11	9	8.8	8.8	8.1	141.79	0	21.103	456350000	25	0.757238	0.809807	0.98462	A6NHN7;A6NHB5;Q14202-2;Q14202;A6NL54;Q14202-3;A0A087X151;A6NC58;Q5SVZ7;H0YH25;Q5SW02;Q9UJ78-1;Q9UBW7-2;Q9UJ78-5;Q9UJ78;Q5SVZ6	A6NHN7;A6NHB5;Q14202-2;Q14202;A6NL54;Q14202-3	Zinc finger MYM-type protein 3	ZMYM3
0.987394	1.02396	1.05016	1.02588	1.05612	1.07405	1.00239	1.01596	1.01207	1.00453	1.00234	1.08591	1.02344	1.01708	0.994231	1.01227	0.947911	0.987723	1.01223	0.996908	0.986551	1.00642	1.04702	0.997314	biological regulation;cellular component organization;cellular component organization at cellular level;cellular component organization or biogenesis;cellular component organization or biogenesis at cellular level;cellular process;chromosome organization;dosage compensation;dosage compensation, by inactivation of X chromosome;inactivation of X chromosome by DNA methylation;organelle organization;…	adenyl nucleotide binding;adenyl ribonucleotide binding;ATP binding;binding;nucleotide binding;purine nucleotide binding;purine ribonucleoside triphosphate binding;purine ribonucleotide binding;ribonucleotide binding	Barr body;cell part;chromosome;intracellular non-membrane-bounded organelle;intracellular organelle;intracellular organelle part;intracellular part;non-membrane-bounded organelle;nuclear chromosome;nuclear part;organelle;organelle part;sex chromosome;X chromosome	Acetylation;Alternativesplicing;Chromosome;Completeproteome;Directproteinsequencing;Diseasemutation;Polymorphism;Proteomicsidentification;Referenceproteome;Ublconjugation			29	29	29	17.2	17.2	17.2	226.37	0	105.2	1809700000	70	0.466031	0.350545	0.548462	A6NHR9;A6NHR9-2;J3KTL8;A6NHR9-3;J3KRK8	A6NHR9;A6NHR9-2;J3KTL8	Structural maintenance of chromosomes flexible hinge domain-containing protein 1	SMCHD1
0.990716	1.02373	0.89864	0.982292	1.10124	1.06484	1.0031	1.01613	0.9806	0.975055	1.00753	0.932622	0.97293	1.00613	0.982977	1.01749	1.15141	1.02729	0.987557	0.983925	0.994853	1.01324	0.903607	0.959566	adult behavior;behavior;behavioral interaction between organisms;biological regulation;cellular component assembly;cellular component assembly at cellular level;cellular component organization;cellular component organization at cellular level;cellular component organization or biogenesis;cellular component organization or biogenesis at cellular level;cellular process;cognition;exploration behavio…	binding;GKAP/Homer scaffold activity;glutamate receptor binding;ionotropic glutamate receptor binding;protein binding;protein complex scaffold;receptor binding;receptor signaling complex scaffold activity;structural molecule activity	apical plasma membrane;axon part;brush border membrane;cell body;cell junction;cell part;cell projection;cell projection membrane;cell projection part;cilium;cilium membrane;cilium part;cytoskeletal part;dendritic spine;growth cone;intermediate filament;intracellular organelle part;intracellular part;ionotropic glutamate receptor complex;macromolecular complex;membrane;membrane part;neurofilament…	Alternativesplicing;ANKrepeat;Celljunction;Cellmembrane;Cellprojection;Completeproteome;Cytoplasm;Glycoprotein;Membrane;Phosphoprotein;Postsynapticcellmembrane;Proteomicsidentification;Referenceproteome;Repeat;SH3-binding;Synapse			4	4	4	3.4	3.4	3.4	134.8	0.0021107	1.9626	696330000	16	0.303265	0.802624	0.517028	E7EUA2;A6NHU9;Q9UPX8-4;Q9UPX8;Q9UPX8-3;H7C1X5;A0A0A0MSQ6;H0Y7S5;Q9UPX8-2;E7EX50;B7ZKU9	E7EUA2;A6NHU9;Q9UPX8-4;Q9UPX8;Q9UPX8-3;H7C1X5;A0A0A0MSQ6;H0Y7S5;Q9UPX8-2	SH3 and multiple ankyrin repeat domains protein 2	SHANK2
1.00109	1.06963	1.10544	1.03244	1.18826	1.20136	1.0076	1.0126	1.01724	1.00813	1.03164	1.25986	1.02445	1.02171	0.997132	1.0196	0.94804	1.00062	1.00557	1.02954	0.928931	0.973741	1.15043	1.03737	anatomical structure morphogenesis;biological regulation;cell communication;cell part morphogenesis;cell projection morphogenesis;cell projection organization;cell-cell signaling;cellular component morphogenesis;cellular component organization;cellular component organization at cellular level;cellular component organization or biogenesis;cellular component organization or biogenesis at cellular l…	binding;lipid binding	cell part;cell projection;cell projection part;centrosome;ciliary transition zone;cilium;cilium part;cytoplasmic part;cytoskeletal part;cytosol;extracellular region part;intercellular bridge;intracellular non-membrane-bounded organelle;intracellular organelle;intracellular organelle part;intracellular part;microtubule organizing center;non-membrane-bounded organelle;organelle;organelle part;prima…	3D-structure;Acetylation;Alternativesplicing;Cellprojection;Cilium;Ciliumbiogenesis/degradation;Completeproteome;Cone-roddystrophy;Cytoplasm;Cytoskeleton;Diseasemutation;Endocytosis;Lipid-binding;Phosphoprotein;Proteintransport;Proteomicsidentification;Referenceproteome;Sensorytransduction;Transport;Vision			3	3	3	11.6	11.6	11.6	28.136	0	3.5155	109950000	7	0.0354696	0.460142	0.592362	A6NIH7;K7EJU3;K7EN86;C9JSK0;Q13432-2;Q13432	A6NIH7	Protein unc-119 homolog B	UNC119B
1.0134	1.09403	1.05694	1.03124	1.15039	1.16654	1.05544	1.06136	0.934662	0.977776	0.964196	1.03494	1.03671	1.01312	0.987656	1.03701	0.916628	0.982251	1.00665	1.00956	0.997703	1.02016	1.04784	1.05583	ATP hydrolysis coupled proton transport;biological regulation;cation homeostasis;cation transport;cell surface receptor linked signaling pathway;cellular cation homeostasis;cellular chemical homeostasis;cellular homeostasis;cellular ion homeostasis;cellular iron ion homeostasis;cellular metal ion homeostasis;cellular process;cellular response to chemical stimulus;cellular response to endogenous s…	active transmembrane transporter activity;adenyl nucleotide binding;adenyl ribonucleotide binding;ATP binding;ATPase activity;ATPase activity, coupled;ATPase activity, coupled to movement of substances;ATPase activity, coupled to transmembrane movement of ions;ATPase activity, coupled to transmembrane movement of substances;binding;catalytic activity;cation transmembrane transporter activity;cati…	cell part;cytoplasmic part;endosomal part;endosome membrane;extracellular membrane-bounded organelle;extracellular organelle;extracellular region part;extracellular vesicular exosome;integral to membrane;intracellular organelle part;intracellular part;intrinsic to membrane;macromolecular complex;membrane;membrane part;membrane-bounded organelle;membrane-bounded vesicle;organelle;organelle membran…	ATP-binding;Completeproteome;Glycoprotein;Hydrogeniontransport;Iontransport;Membrane;Nucleotide-binding;Proteomicsidentification;Referenceproteome;Signal;Transmembrane;Transmembranehelix;Transport;Vacuole	Epithelial cell signaling in Helicobacter pylori infection;ko05152;Lysosome;Oxidative phosphorylation;Phagosome;Rheumatoid arthritis;Vibrio cholerae infection		1	1	1	7	7	7	13.887	0.0042472	1.5818	60473000	7	0.525053	0.350995	0.920626	H7C2Y8;H7C0T7;F2Z3L8;A6QRJ1;A6NLC6;Q15904	H7C2Y8;H7C0T7;F2Z3L8;A6QRJ1;A6NLC6;Q15904	V-type proton ATPase subunit S1	ATP6AP1
0.987084	1.02132	1.08082	1.02739	1.07271	1.07913	1.01241	1.01205	1.00073	1.00023	1.02236	1.09713	1.02585	1.01798	0.996069	1.01616	0.964369	0.987474	1.00293	0.995153	0.987279	1.00753	1.04289	1.00357	cellular macromolecule metabolic process;cellular metabolic process;cellular nitrogen compound metabolic process;cellular process;macromolecule metabolic process;metabolic process;mRNA metabolic process;mRNA processing;nitrogen compound metabolic process;nucleic acid metabolic process;nucleobase-containing compound metabolic process;primary metabolic process;RNA metabolic process;RNA processing	binding;nucleic acid binding;nucleotide binding;RNA binding	cell part;intracellular membrane-bounded organelle;intracellular organelle;intracellular part;membrane-bounded organelle;nucleus;organelle	Completeproteome;Proteomicsidentification;Referenceproteome			17	17	2	30.9	30.9	2.8	56.51	0	160.02	50644000000	246	0.269121	0.611949	0.653936	A6NLN1;K7ES59;A0A087WU68;K7EK45;A0A087WUW5;K7ELW5	A6NLN1		PTBP1
0.940263	0.991936	1.04935	1.04672	1.34725	1.43212	0.996715	1.00594	1.02021	1.00095	0.973739	1.10702	1.01541	1.00082	0.996534	1.02555	0.927711	1.00454	1.01204	0.984697	0.990031	1.03418	1.01441	1.01549	activation of MAPK activity;biological regulation;biosynthetic process;cell proliferation;cellular biosynthetic process;cellular lipid metabolic process;cellular macromolecule metabolic process;cellular metabolic process;cellular process;cellular protein metabolic process;entry into cell of other organism involved in symbiotic interaction;entry into host;entry into host cell;entry into other orga…	antigen binding;binding;MHC class II protein complex binding;MHC protein complex binding	adherens junction;anchoring junction;cell junction;cell part;cell-substrate adherens junction;cell-substrate junction;extracellular membrane-bounded organelle;extracellular organelle;extracellular region part;extracellular vesicular exosome;focal adhesion;immunological synapse;integral to membrane;integral to plasma membrane;intrinsic to membrane;intrinsic to plasma membrane;membrane;membrane par…	3D-structure;Completeproteome;Disulfidebond;Host-virusinteraction;Membrane;Proteomicsidentification;Referenceproteome;Transmembrane;Transmembranehelix	B cell receptor signaling pathway;Hepatitis C;Malaria		2	2	2	21.8	21.8	21.8	17.963	0	19.585	1285400000	17	0.124707	0.479503	0.586606	E9PJK1;E9PRJ8;H0YDL9;H0YDJ9;E9PIF1;A6NMH8;P60033;E9PM31;H0YEE2	E9PJK1;E9PRJ8;H0YDL9;H0YDJ9;E9PIF1;A6NMH8;P60033;E9PM31;H0YEE2	Tetraspanin;CD81 antigen	CD81
0.962376	1.0003	1.07852	1.03372	1.09446	1.09594	0.992336	1.00567	1.01641	1.00535	0.960421	1.07523	1.0328	1.02305	0.985739	1.00753	1.04322	0.986001	1.01593	0.989471	1.00904	1.04131	0.998658	0.993961	actin cytoskeleton organization;actin filament organization;actin filament polymerization;actin filament-based process;actin polymerization or depolymerization;biological regulation;cellular component assembly;cellular component assembly at cellular level;cellular component organization;cellular component organization at cellular level;cellular component organization or biogenesis;cellular compon…	binding;protein binding;receptor binding	cell part;cytoplasmic part;cytosol;early endosome;endosome;Golgi apparatus;intracellular membrane-bounded organelle;intracellular non-membrane-bounded organelle;intracellular organelle;intracellular organelle part;intracellular part;membrane-bounded organelle;mitochondrion;non-membrane-bounded organelle;nuclear part;nucleolus;organelle;organelle part	Acetylation;Alternativesplicing;Coiledcoil;Completeproteome;Cytoplasm;Developmentalprotein;Differentiation;Endosome;Oogenesis;Polymorphism;Prematureovarianfailure;Proteomicsidentification;Referenceproteome;Repeat	Regulation of actin cytoskeleton		11	11	11	11.8	11.8	11.8	124.85	0	81.806	729970000	41	0.273462	0.624213	0.753683	A6NML8;C9J6U3;O60879-2;K4DI95;O60879-3;O60879	A6NML8;C9J6U3;O60879-2;K4DI95;O60879-3;O60879	Protein diaphanous homolog 2	DIAPH2
0.981114	1.00512	0.981416	0.999039	1.05649	1.0681	0.995318	1.00889	0.992717	0.976928	1.03933	0.934925	1.02599	1.03058	1.00504	1.01056	1.07297	1.01949	1.00562	0.982453	1.00793	1.01881	0.912398	0.983415	actin cytoskeleton organization;actin filament bundle assembly;actin filament organization;actin filament-based process;anatomical structure morphogenesis;cell morphogenesis;cellular component assembly;cellular component assembly at cellular level;cellular component morphogenesis;cellular component organization;cellular component organization at cellular level;cellular component organization or b…	actin binding;actin filament binding;binding;cytoskeletal protein binding;protein binding	cell part;cytoplasm;cytoskeletal part;intracellular organelle part;intracellular part;macromolecular complex;microtubule;myosin complex;myosin II complex;organelle part;protein complex	Acetylation;Actin-binding;Alternativesplicing;Completeproteome;Cytoplasm;Cytoskeleton;Microtubule;Phosphoprotein;Polymorphism;Proteomicsidentification;Referenceproteome			6	6	6	8	8	8	83.238	0	34.811	357960000	18	0.759567	0.937411	0.897588	A6NN40;Q2M3G4;Q2M3G4-2;C9JXU1	A6NN40;Q2M3G4;Q2M3G4-2;C9JXU1	Protein Shroom1	SHROOM1
0.980052	1.01844	0.977337	1.02086	1.03525	1.07806	1.00184	1.02033	0.991134	0.977294	0.977281	0.969186	1.02892	1.01549	1.02117	1.01919	1.08238	1.04523	1.01795	1.02131	0.984435	1.00804	0.981217	1.04242	anatomical structure development;anatomical structure formation involved in morphogenesis;biological adhesion;biological regulation;blood coagulation;brain development;cell activation;cell adhesion;cell development;cell junction assembly;cell junction organization;cell-cell junction assembly;cell-cell junction organization;cellular component assembly;cellular component assembly at cellular level;…		adherens junction;anchoring junction;apical plasma membrane;cell junction;cell part;cell-substrate adherens junction;cell-substrate junction;clathrin coated vesicle membrane;clathrin-coated endocytic vesicle membrane;coated vesicle membrane;cytoplasmic part;cytoplasmic vesicle membrane;cytoplasmic vesicle part;endocytic vesicle membrane;external side of plasma membrane;extracellular membrane-boun…	Celladhesion;Cellmembrane;Completeproteome;Directproteinsequencing;Disulfidebond;Fertilization;Glycoprotein;Lipoprotein;Membrane;Palmitate;Proteomicsidentification;Referenceproteome;Transmembrane;Transmembranehelix	Hematopoietic cell lineage		8	8	8	25.2	25.2	25.2	17.764	0	22.506	23348000000	111	0.364126	0.421346	0.994305	A6NNI4;G8JLH6;P21926;A0A087WZG3;A0A087WU13;F5GXT1	A6NNI4;G8JLH6;P21926;A0A087WZG3;A0A087WU13	Tetraspanin;CD9 antigen	CD9
0.975991	1.00385	1.10141	1.03211	1.06161	1.07744	1.011	1.01829	1.03308	1.00815	0.997714	1.12732	1.01437	0.998235	0.98802	1.00514	0.946266	0.995896	0.99845	0.981819	0.972015	1.02895	1.09042	1.03001	acidic amino acid transport;amine transport;amino acid transport;anion transport;carboxylic acid transport;establishment of localization;establishment of protein localization;ion transport;L-glutamate transport;nitrogen compound transport;organic acid transport;organic anion transport;organic substance transport;protein transport;transport		cell part;cytoplasmic part;endosomal part;endosome membrane;integral to membrane;intracellular organelle part;intracellular part;intrinsic to membrane;membrane;membrane part;organelle membrane;organelle part	Completeproteome;Endosome;Membrane;Polymorphism;Proteintransport;Proteomicsidentification;Referenceproteome;Transmembrane;Transmembranehelix;Transport			2	2	1	12.5	12.5	6.9	17.188	0.00062992	2.6856	347170000	11	0.21622	0.621373	0.543611	A6NP52;O60831	A6NP52;O60831	PRA1 family protein 2	PRAF2
0.986999	1.01387	1.02946	1.00705	1.05247	1.03539	1.02502	1.02585	0.990743	0.986484	1.02327	0.999357	1.02817	1.01897	0.9883	1.01014	0.993195	0.999106	1.01796	1.0243	0.985109	0.992112	0.96726	0.966297	activation of immune response;activation of innate immune response;biological regulation;biosynthetic process;cellular biosynthetic process;cellular metabolic process;cellular nitrogen compound biosynthetic process;cellular nitrogen compound metabolic process;cellular process;cellular response to chemical stimulus;cellular response to dsRNA;cellular response to exogenous dsRNA;cellular response t…	adenyl nucleotide binding;adenyl ribonucleotide binding;ATP binding;binding;cation binding;DNA binding;GTP binding;guanyl nucleotide binding;guanyl ribonucleotide binding;ion binding;metal ion binding;nucleic acid binding;nucleotide binding;purine nucleotide binding;purine ribonucleoside triphosphate binding;purine ribonucleotide binding;ribonucleotide binding	cell part;cytoplasmic part;cytosol;intracellular part	3D-structure;Acetylation;Alternativesplicing;Antiviraldefense;ATP-binding;Completeproteome;Cytoplasm;DNA-binding;GTP-binding;Immunity;Innateimmunity;Magnesium;Metal-binding;Nucleotide-binding;Nucleotidyltransferase;Phosphoprotein;Polymorphism;Referenceproteome;Transferase;Zinc			12	12	12	25.3	25.3	25.3	56.68	0	67.839	2763000000	55	0.233853	0.749047	0.963718	A6PW79;Q8N884-2;Q8N884	A6PW79;Q8N884-2;Q8N884	Cyclic GMP-AMP synthase	MB21D1
0.968271	1.00168	1.05388	1.02045	1.07924	1.08251	1.01151	1.00983	1.00185	0.98747	1.03791	0.998047	1.02421	1.01479	0.997863	1.01789	0.950274	0.99741	1.00698	0.985003	1.01807	1.0257	0.927369	0.966173	biological regulation;biosynthetic process;carbohydrate metabolic process;carbohydrate transport;cell cycle;cell cycle process;cell surface receptor linked signaling pathway;cellular biosynthetic process;cellular component disassembly;cellular component disassembly at cellular level;cellular component organization;cellular component organization at cellular level;cellular component organization o…		cell part;cytoplasmic part;endoplasmic reticulum membrane;endoplasmic reticulum part;envelope;intracellular organelle part;intracellular part;macromolecular complex;membrane;membrane part;nuclear envelope;nuclear membrane;nuclear part;nuclear pore;organelle envelope;organelle membrane;organelle part;pore complex;protein complex	Alternativesplicing;Completeproteome;Endoplasmicreticulum;Membrane;mRNAtransport;Nuclearporecomplex;Nucleus;Phosphoprotein;Polymorphism;Proteintransport;Proteomicsidentification;Referenceproteome;Repeat;Translocation;Transmembrane;Transmembranehelix;Transport	RNA transport		14	14	3	13.3	13.3	2.7	125.06	0	141.69	2804500000	44	0.807799	0.698574	0.699028	A8CG34;A0A075B7F8;A0A087WY75;Q96HA1-2;A8CG34-2;Q96HA1-3;C9JFL1;C9JER0;C9J370;Q6PJE2-5;Q6PJE2;A6NF01	A8CG34;A0A075B7F8;A0A087WY75;Q96HA1-2;A8CG34-2;Q96HA1-3	Nuclear envelope pore membrane protein POM 121C;Nuclear envelope pore membrane protein POM 121	POM121C;POM121
0.970038	1.0004	1.01614	1.00522	1.05124	1.06321	1.01001	1.01589	0.99219	0.983144	1.01377	1.0093	1.02565	1.0166	1.00347	1.01183	1.00154	1.00276	1.00535	0.999006	0.99734	1.01247	0.971475	1.00149	adherens junction organization;biological adhesion;biological regulation;cell adhesion;cell communication;cell junction assembly;cell junction organization;cell-cell junction organization;cell-cell signaling;cellular component assembly;cellular component assembly at cellular level;cellular component organization;cellular component organization at cellular level;cellular component organization or …	binding;enzyme binding;GTPase binding;protein binding;protein C-terminus binding;Ras GTPase binding;small GTPase binding	adherens junction;anchoring junction;apical part of cell;cell junction;cell part;cell-cell adherens junction;cell-cell junction;cytoplasm;cytoplasmic part;cytosol;intracellular organelle part;intracellular part;membrane;nuclear part;nucleoplasm;organelle part;plasma membrane	3D-structure;Acetylation;Alternativesplicing;Celladhesion;Celljunction;Chromosomalrearrangement;Coiledcoil;Completeproteome;Phosphoprotein;Proteomicsidentification;Proto-oncogene;Referenceproteome;Repeat	Adherens junction;Leukocyte transendothelial migration;Tight junction		45	45	44	25.7	25.7	25.7	201.8	0	204.02	6400600000	167	0.480831	0.520766	0.806976	A8MQ02;J3KN01;P55196;P55196-5;P55196-3;P55196-1;Q5TIG5;P55196-6;P55196-2;H0Y8L4;H0Y7R8;H0Y9I0;F8W9I4;E9PFY5;H0Y948;H0Y8U8;H0YA98	A8MQ02;J3KN01;P55196;P55196-5;P55196-3;P55196-1;Q5TIG5;P55196-6;P55196-2	Afadin	MLLT4
[truncated: 5,131 more rows]
