# Supplementary material for: Quantitative proteomics discloses monacolin K-induced alterations in triple-negative breast cancer cell proteomes and phosphoproteomes
Source: Royal Society of Chemistry journal article supplement (doi:10.1039/c9mo00140a), 2019-12-03
Supplement: c9mo00140a3.xlsx [file c9mo00140a3.xlsx]

## Sheet: Supplementary table 2_phospho
ST_MNK05_P1_NORMALIZED	ST_MNK05_P2_NORMALIZED	ST_MNK05_P3_NORMALIZED	ST_MNK05_P4_NORMALIZED	ST_MNK5_P1_NORMALIZED	ST_MNK5_P2_NORMALIZED	ST_MNK5_P3_NORMALIZED	ST_MNK5_P4_NORMALIZED	IT_MNK05_P1_NORMALIZED	IT_MNK05_P2_NORMALIZED	IT_MNK05_P3_NORMALIZED	IT_MNK05_P4_NORMALIZED	IT_MNK5_P1_NORMALIZED	IT_MNK5_P2_NORMALIZED	IT_MNK5_P3_NORMALIZED	IT_MNK5_P4_NORMALIZED	LT_MNK05_P1_NORMALIZED	LT_MNK05_P2_NORMALIZED	LT_MNK05_P3_NORMALIZED	LT_MNK05_P4_NORMALIZED	LT_MNK5_P1_NORMALIZED	LT_MNK5_P2_NORMALIZED	LT_MNK5_P3_NORMALIZED	LT_MNK5_P4_NORMALIZED	C: Amino acid	N: Position	C: Charge	C: Multiplicity	C: Motifs	C: Known site	C: Origin	C: GOBP name	C: GOMF name	C: GOCC name	C: KEGG name	C: Keywords	C: Corum	C: Prosite	C: Prosite name	N: Localization prob	N: PEP	N: Score	N: Delta score	N: Score for localization	N: Mass error [ppm]	N: Intensity	N: Two-way ANOVA p value TIME	N: Two-way ANOVA p value CONCENTRATION	N: Two-way ANOVA p value Interaction	T: Proteins
1.01806	0.998144	1.04509	1.01342	1.06862	1.04284	1.02163	1.05379	1.05551	1.02579	0.973538	0.965742	1.0893	1.04014	1.02255	1.02638	1.09777	1.06738	1.07817	1.06245	1.2468	1.21993	1.19506	1.18755	S	652	2	___1	Casein kinase II substrate motif;ERK1,2 kinase substrate motif;Growth associated histone HI kinase substrate motif;GSK-3, ERK1, ERK2, CDK5 substrate motif;MDC1 BRCT domain binding motif;PKA kinase substrate motif;PKC kinase substrate motif;Plk1 PBD domain binding motif;WW domain binding motif	+	HTP;LTP	anatomical structure development;apoptosis;biological regulation;cardiac cell development;cardiac muscle cell development;cell cycle;cell cycle process;cell death;cell development;cellular component disassembly;cellular component disassembly at cellular level;cellular component disassembly involved in apoptosis;cellular component organization;cellular component organization at cellular level;cell…	structural molecule activity	cell part;cytoplasm;cytoplasmic part;cytoskeletal part;cytosol;envelope;intermediate filament;intracellular membrane-bounded organelle;intracellular organelle;intracellular organelle part;intracellular part;lamin filament;macromolecular complex;membrane;membrane-bounded organelle;nuclear body;nuclear envelope;nuclear lamina;nuclear membrane;nuclear part;nuclear speck;nucleoplasm;nucleoplasm part;…	Arrhythmogenic right ventricular cardiomyopathy (ARVC);Dilated cardiomyopathy;Hypertrophic cardiomyopathy (HCM)	3D-structure;Acetylation;Alternativesplicing;Cardiomyopathy;Charcot-Marie-Toothdisease;Coiledcoil;Completeproteome;Congenitalmusculardystrophy;Directproteinsequencing;Diseasemutation;Emery-Dreifussmusculardystrophy;Intermediatefilament;Isopeptidebond;Limb-girdlemusculardystrophy;Lipoprotein;Methylation;Neurodegeneration;Neuropathy;Nucleus;Phosphoprotein;Polymorphism;Prenylation;Referenceproteome;…	CTCF-nucleophosmin-PARP-HIS-KPNA-LMNA-TOP complex;Emerin architectural complex;Emerin complex 24	PS00226	IF	0.998009	5.2388e-06	164.48	145.03	160.91	0.17437	607390000	4.40495e-07	6.59135e-05	0.00129569	P02545
0.993807	1.00967	1.03376	0.948359	1.02804	1.03679	1.02275	1.00651	0.996686	0.989037	0.998525	0.929353	1.00639	0.976935	1.00848	0.932971	1.04246	1.04802	1.09453	1.1025	1.02132	0.912804	1.00028	0.933419	S	838	3	___1	Casein kinase II substrate motif;DNA dependent Protein kinase substrate motif;ERK1,2 kinase substrate motif;GSK-3, ERK1, ERK2, CDK5 substrate motif;PKA kinase substrate motif;PKC kinase substrate motif;WW domain binding motif	+	HTP		binding;cation binding;ion binding;metal ion binding;nucleic acid binding;transition metal ion binding;zinc ion binding	cell part;intracellular membrane-bounded organelle;intracellular organelle;intracellular part;membrane-bounded organelle;nucleus;organelle		Alternativesplicing;Completeproteome;Diseasemutation;Dystonia;Metal-binding;Nucleus;Phosphoprotein;Polymorphism;Referenceproteome;Zinc;Zinc-finger		PS00028;PS50171	ZF_MATRIN;ZINC_FINGER_C2H2_1	0.988843	3.24641e-05	112.96	90.599	112.96	1.3034	538780000	0.0335403	0.193291	0.0104725	Q9ULV3
0.970535	1.02847	1.0425	1.02978	1.02995	1.05089	1.03779	1.02032	1.02789	1.00458	0.996101	1.0003	1.00824	0.996573	1.0232	1.0058	1.02217	1.0303	1.04485	1.00098	1.00022	0.958312	0.973671	1.01452	T	977	3	___1	Calmodulin-dependent protein kinase II substrate motif;GSK-3, ERK1, ERK2, CDK5 substrate motif;PKC kinase substrate motif;WW domain binding motif	+	HTP	activation of MAPK activity;adult behavior;anatomical structure development;anatomical structure morphogenesis;axon guidance;behavior;biological regulation;brain development;branching morphogenesis of a tube;carbohydrate homeostasis;cell communication;cell differentiation;cell migration;cell morphogenesis;cell morphogenesis involved in differentiation;cell motility;cell proliferation;cell surface…	adenyl nucleotide binding;adenyl ribonucleotide binding;ATP binding;binding;catalytic activity;enzyme binding;hepatocyte growth factor-activated receptor activity;kinase activity;molecular transducer activity;nucleotide binding;phosphatase binding;phosphotransferase activity, alcohol group as acceptor;protein binding;protein kinase activity;protein phosphatase binding;protein tyrosine kinase acti…	basal plasma membrane;cell part;cell surface;extracellular region;integral to membrane;integral to plasma membrane;intrinsic to membrane;intrinsic to plasma membrane;membrane;membrane part;plasma membrane;plasma membrane part	Adherens junction;Axon guidance;Bacterial invasion of epithelial cells;Cytokine-cytokine receptor interaction;Endocytosis;Epithelial cell signaling in Helicobacter pylori infection;Focal adhesion;Malaria;Melanoma;Pathways in cancer;Renal cell carcinoma	3D-structure;Alternativesplicing;ATP-binding;Chromosomalrearrangement;Completeproteome;Diseasemutation;Disulfidebond;Glycoprotein;Kinase;Membrane;Nucleotide-binding;Phosphoprotein;Polymorphism;Proto-oncogene;Receptor;Referenceproteome;Repeat;Secreted;Signal;Transferase;Transmembrane;Transmembranehelix;Tyrosine-proteinkinase;Ublconjugation	HGF-Met complex;MET-CIN85-SH3GL3-CBL complex, HGF stimulated	PS00107;PS00109;PS50011;PS51004	PROTEIN_KINASE_ATP;PROTEIN_KINASE_DOM;PROTEIN_KINASE_TYR;SEMA	1	0.00153305	109.79	81.585	80.102	0.79254	100720000	0.087889	0.402613	0.0161593	P08581
1.02896	1.02764	1.05031	1.00742	1.0481	1.03753	1.0513	1.00212	0.985652	0.949372	0.958047	1.00478	0.971176	0.950213	0.957073	1.00548	1.04523	1.02758	0.988593	1.11176	1.12252	1.21415	1.09461	1.05986	S	552	4	___1	14-3-3 domain binding motif;Calmodulin-dependent protein kinase II substrate motif;Calmodulin-dependent protein kinase IV substrate motif;Casein kinase II substrate motif;Chk1 kinase substrate motif;Pim1 kinase substrate sequence;PKA kinase substrate motif;PKA, PKG kinase substrate motif;PKC epsilon kinase substrate motif;PKC kinase substrate motif;PKG kinase substrate motif;ZIP kinase substrate …	+	CST;HTP	cell differentiation;cellular developmental process;cellular localization;cellular process;developmental process;establishment of localization;establishment of localization in cell;establishment of protein localization;intracellular protein transport;intracellular transport;localization;melanocyte differentiation;melanosome localization;organelle localization;pigment cell differentiation;pigment …	binding;cation binding;enzyme binding;GTPase binding;ion binding;metal ion binding;protein binding;Rab GTPase binding;Ras GTPase binding;small GTPase binding	actin filament bundle;actomyosin;cell cortex part;cell part;cell projection;cortical actin cytoskeleton;cortical cytoskeleton;cytoplasmic part;cytoskeletal part;cytoskeleton;dendrite;extracellular membrane-bounded organelle;extracellular organelle;extracellular region part;extracellular vesicular exosome;intracellular non-membrane-bounded organelle;intracellular organelle;intracellular organelle …		Alternativesplicing;Coiledcoil;Completeproteome;Cytoplasm;Diseasemutation;Metal-binding;Polymorphism;Referenceproteome;Repeat;Zinc;Zinc-finger		PS50916	RABBD	0.999982	0.000740215	108.47	61.283	88.596	0.013982	412010000	5.03654e-05	0.102976	0.0242275	Q9BV36
0.987877	1.02544	1.02681	1.00316	0.990442	1.02488	1.03255	1.00003	1.02294	0.978979	1.01412	0.988324	1.02531	0.973347	0.997681	0.991044	1.00062	1.03337	0.933979	1.01527	1.06005	1.13698	1.03153	1.0271	S	954	4	___1	Casein kinase II substrate motif	+	HTP	biological regulation;cellular process;cellular response to stimulus;intracellular signal transduction;regulation of biological process;regulation of cellular process;regulation of response to stimulus;regulation of signal transduction;regulation of signaling;regulation of small GTPase mediated signal transduction;response to stimulus;signal transduction;small GTPase mediated signal transduction	enzyme activator activity;enzyme regulator activity;GTPase activator activity;GTPase regulator activity;nucleoside-triphosphatase regulator activity	adherens junction;anchoring junction;cell junction;cell part;cell projection;cell-substrate adherens junction;cell-substrate junction;cytoplasmic part;cytosol;focal adhesion;intracellular part;lamellipodium		Celljunction;Cellprojection;Completeproteome;GTPaseactivation;Phosphoprotein;Polymorphism;Referenceproteome		PS50238	RHOGAP	0.998316	3.27307e-10	162.29	144.59	162.29	1.1098	122960000	0.181212	0.118362	0.0336262	Q2M1Z3
0.893034	1.00359	1.03571	0.980691	0.90139	1.00882	1.0288	0.921339	1.00018	0.971471	1.02447	1.06111	1.0342	0.943895	1.01923	1.08928	1.0097	1.0377	0.868372	0.93405	1.23603	1.159	1.01996	1.11152	S	1559	3	___1	14-3-3 domain binding motif;Calmodulin-dependent protein kinase II substrate motif;Cdc2 kinase substrate motif;CDK kinase substrate motif;CDK1,2,4,6 kinase substrate motif;CLK1 kinase substrate motif;ERK1,2 kinase substrate motif;GSK-3, ERK1, ERK2, CDK5 substrate motif;PKA kinase substrate motif;PKC kinase substrate motif;WW domain binding motif	+	CST;HTP	biological regulation;cell surface receptor linked signaling pathway;cellular macromolecule metabolic process;cellular metabolic process;cellular process;cellular protein metabolic process;cellular response to stimulus;enzyme linked receptor protein signaling pathway;establishment of localization;establishment of localization in cell;intracellular signal transduction;intracellular transport;macro…	binding;cAMP-dependent protein kinase activity;catalytic activity;cation binding;cyclic nucleotide-dependent protein kinase activity;enzyme regulator activity;GTPase regulator activity;guanyl-nucleotide exchange factor activity;ion binding;kinase activity;metal ion binding;molecular transducer activity;nucleoside-triphosphatase regulator activity;phosphotransferase activity, alcohol group as acce…	cell part;cytoplasm;cytoplasmic part;cytosol;intracellular membrane-bounded organelle;intracellular organelle;intracellular part;membrane;membrane-bounded organelle;nucleus;organelle;perinuclear region of cytoplasm		3D-structure;Alternativesplicing;Coiledcoil;Completeproteome;Cytoplasm;Guanine-nucleotidereleasingfactor;Membrane;Metal-binding;Nucleus;Phosphoprotein;Polymorphism;Proto-oncogene;Referenceproteome;Zinc;Zinc-finger		PS00479;PS50003;PS50010;PS50081	DH_2;PH_DOMAIN;ZF_DAG_PE_1;ZF_DAG_PE_2	0.999989	0.000847313	86.136	47.114	80.165	0.17647	440660000	0.18404	0.112282	0.0342626	Q12802
0.943187	0.998526	1.02106	1.03361	0.979258	1.00973	1.0036	0.995968	0.970664	0.962927	0.991793	1.00991	1.00639	0.956385	0.996248	1.01373	1.02681	1.02924	0.970306	0.877488	1.13738	1.08957	1.03516	1.00889	S	296	4	___1	14-3-3 domain binding motif;AMP-activated protein kinase substrate motif;Calmodulin-dependent protein kinase I substrate motif;Calmodulin-dependent protein kinase II substrate motif;Calmodulin-dependent protein kinase IV substrate motif;Casein kinase II substrate motif;Chk1 kinase substrate motif;PKA kinase substrate motif;PKC kinase substrate motif	+	CST;HTP	cellular component organization;cellular component organization or biogenesis;cellular membrane organization;cellular process;endocytosis;establishment of localization;membrane invagination;membrane organization;transport;vesicle-mediated transport	binding;identical protein binding;lipid binding;protein binding	cell cortex;cell part;coated pit;cytoplasmic membrane-bounded vesicle;cytoplasmic part;cytoplasmic vesicle;cytoskeleton;intracellular membrane-bounded organelle;intracellular non-membrane-bounded organelle;intracellular organelle;intracellular part;lysosome;lytic vacuole;membrane;membrane part;membrane-bounded organelle;membrane-bounded vesicle;non-membrane-bounded organelle;organelle;plasma memb…		3D-structure;Acetylation;Alternativesplicing;Cellmembrane;Chromosomalrearrangement;Coatedpit;Coiledcoil;Completeproteome;Cytoplasm;Cytoplasmicvesicle;Cytoskeleton;Endocytosis;Lipid-binding;Lysosome;Membrane;Phosphoprotein;Polymorphism;Referenceproteome;SH3domain		PS50002;PS51741	F_BAR;SH3	0.990145	3.81713e-40	231.29	210.28	231.29	-0.54902	3259400000	0.267565	0.0650505	0.0345272	Q96RU3
0.991657	1.01376	1.0104	1.02595	1.03686	1.04862	1.01466	1.03661	1.02126	0.989094	0.986111	0.975072	0.999461	0.998542	1.01149	1.00376	1.04833	1.00588	1.0159	1.0579	1.0328	0.978078	0.994744	0.995574	S	532	3	___1	Casein kinase I substrate motif;Casein kinase II substrate motif	+	CST;HTP	anatomical structure development;axon guidance;biological regulation;cellular macromolecule metabolic process;cellular metabolic process;cellular process;cellular protein metabolic process;cellular response to chemical stimulus;cellular response to cytokine stimulus;cellular response to heat;cellular response to interleukin-4;cellular response to organic substance;cellular response to stimulus;ce…	adenyl nucleotide binding;adenyl ribonucleotide binding;antigen binding;ATP binding;binding;double-stranded RNA binding;enzyme binding;enzyme regulator activity;kinase binding;MHC class II protein complex binding;MHC protein complex binding;nitric-oxide synthase regulator activity;nucleic acid binding;nucleotide binding;protein binding;protein domain specific binding;purine nucleotide binding;pur…	cell part;cytoplasm;cytoplasmic membrane-bounded vesicle;cytoplasmic part;cytoplasmic vesicle;cytosol;extracellular membrane-bounded organelle;extracellular organelle;extracellular region part;extracellular vesicular exosome;intracellular membrane-bounded organelle;intracellular organelle;intracellular organelle part;intracellular part;melanosome;membrane;membrane-bounded organelle;membrane-bound…	Antigen processing and presentation;NOD-like receptor signaling pathway;Pathways in cancer;Plant-pathogen interaction;Progesterone-mediated oocyte maturation;Prostate cancer;Protein processing in endoplasmic reticulum	3D-structure;Acetylation;ATP-binding;Chaperone;Coiledcoil;Completeproteome;Cytoplasm;Directproteinsequencing;Glycoprotein;Nucleotide-binding;Phosphoprotein;Polymorphism;Referenceproteome;S-nitrosylation;Stressresponse;Ublconjugation	CDC37-HSP90AA1-HSP90AB1-MAP3K11 complex;HSP90-CDC37-LRRK2 complex;IKBKB-CDC37-KIAA1967-HSP90AB1-HSP90AA1 complex;Kinase maturation complex 1;Kinase maturation complex 2;LRRK2-CHIP-HSP90 complex;P2X7 receptor signalling complex;RNA-induced silencing complex, RISC;TNF-alpha/NF-kappa B signaling complex 10;TNF-alpha/NF-kappa B signaling complex 6;TNF-alpha/NF-kappa B signaling complex 7;TNF-alpha/NF…	PS00298	HSP90	0.998198	0.000636617	119.07	32.862	67.685	0.32539	79011000	0.0402914	0.764857	0.0357163	P08238;Q58FF7;Q58FF8
0.957883	0.992823	1.0216	1.0063	1.03383	1.02053	1.02451	1.02207	1.08612	1.01983	0.975472	0.987081	1.05354	1.01811	1.01064	1.00734	1.08741	1.03218	1.09641	1.04647	1.05101	0.959522	1.00124	1.01048	S	371	3	___1	Casein kinase I substrate motif	+	CST;HTP	establishment of localization;transport		cell part;integral to membrane;intrinsic to membrane;membrane part		Acetylation;Alternativesplicing;Completeproteome;Membrane;Phosphoprotein;Referenceproteome;Transmembrane;Transmembranehelix;Transport				0.989554	7.45287e-09	141.34	128.71	98.329	-0.37173	121310000	0.245536	0.594644	0.0414423	Q8IXU6
0.962009	1.03034	1.10312	0.986869	1.0067	1.02376	1.05742	0.950994	1.03833	0.990653	1.00678	1.0096	0.993224	0.995244	1.0246	0.966973	0.894959	1.06053	0.948309	0.678504	1.3401	1.07165	0.98057	0.975695	S	153	3	___1	14-3-3 domain binding motif;Calmodulin-dependent protein kinase II substrate motif;Casein kinase II substrate motif;CLK1 kinase substrate motif;G protein-coupled receptor kinase 1 substrate motif;PAK2 kinase substrate motif;PKA kinase substrate motif;PKA, PKG kinase substrate motif;PKC epsilon kinase substrate motif;PKC kinase substrate motif;PKG kinase substrate motif	+	CST;HTP	biological regulation;cellular macromolecule metabolic process;cellular metabolic process;cellular nitrogen compound metabolic process;cellular process;cellular response to chemical stimulus;cellular response to dsRNA;cellular response to organic substance;cellular response to stimulus;dsRNA fragmentation;I-kappaB kinase/NF-kappaB cascade;intracellular protein kinase cascade;intracellular signal …		cell part;cytoplasm;intracellular organelle part;intracellular part;nuclear part;nucleoplasm;organelle part		Coiledcoil;Completeproteome;Diseasemutation;Epilepsy;Isopeptidebond;Nucleus;Phosphoprotein;Referenceproteome;RNA-mediatedgenesilencing;Ublconjugation		PS50006	FHA_DOMAIN	0.945019	0.0004932	69.979	55.721	66.606	0.23061	132070000	0.932991	0.155405	0.0437909	Q8TAD8
0.95814	1.02188	1.04279	1.01163	0.989722	1.01665	1.02421	0.96878	1.04093	0.980954	1.00942	1.01237	1.01647	1.00657	1.02155	1.02714	1.03419	1.02841	0.952745	0.91097	1.06241	1.11284	1.02958	1.02433	S	1721	2	___1	Casein kinase II substrate motif;MAPKAPK2 kinase substrate motif;PAK2 kinase substrate motif;PKA kinase substrate motif;PKC kinase substrate motif	+	CST;HTP	apoptosis;cell death;cell junction assembly;cell junction organization;cell-substrate junction assembly;cellular component assembly;cellular component assembly at cellular level;cellular component disassembly;cellular component disassembly at cellular level;cellular component disassembly involved in apoptosis;cellular component organization;cellular component organization at cellular level;cellul…	ankyrin binding;binding;cytoskeletal protein binding;protein binding;structural constituent of muscle;structural molecule activity	adherens junction;anchoring junction;cell junction;cell part;cell-substrate adherens junction;cell-substrate junction;contractile fiber part;costamere;cytoplasm;cytoplasmic part;cytoskeleton;cytosol;extracellular membrane-bounded organelle;extracellular organelle;extracellular region part;extracellular vesicular exosome;focal adhesion;hemidesmosome;intermediate filament cytoskeleton;intracellular…		3D-structure;Acetylation;Actin-binding;Alternativesplicing;Celljunction;Coiledcoil;Completeproteome;Cytoplasm;Cytoskeleton;Directproteinsequencing;Diseasemutation;Epidermolysisbullosa;Limb-girdlemusculardystrophy;Phosphoprotein;Polymorphism;Referenceproteome;Repeat		PS00019;PS00020;PS50021	ACTININ_1;ACTININ_2;CH	1	0.000454634	126.31	67.88	103.88	-0.23835	21353000000	0.727081	0.119515	0.0486687	Q15149
0.991552	1.01302	1.02511	0.997705	1.01733	1.02543	1.01642	1.00521	1.01781	0.990805	0.992936	0.976743	1.00916	0.990438	1.00735	0.987833	1.0173	1.01549	1.02208	1.02134	1.00735	0.957454	1.00437	0.990948	S	1008	3	___1	ERK1,2 kinase substrate motif;Growth associated histone HI kinase substrate motif;GSK-3, ERK1, ERK2, CDK5 substrate motif;PKA kinase substrate motif;PKC kinase substrate motif;WW domain binding motif	+	CST;HTP	anatomical structure morphogenesis;cell part morphogenesis;cell projection morphogenesis;cell projection organization;cellular component morphogenesis;cellular component organization;cellular component organization at cellular level;cellular component organization or biogenesis;cellular component organization or biogenesis at cellular level;cellular developmental process;cellular process;cilium m…	binding;cation binding;enzyme activator activity;enzyme regulator activity;GTPase activator activity;GTPase regulator activity;ion binding;lipid binding;metal ion binding;nucleoside-triphosphatase regulator activity;phosphatidylinositol binding;phosphatidylinositol-3,4,5-trisphosphate binding;phosphatidylinositol-4,5-bisphosphate binding;phospholipid binding;transition metal ion binding;zinc ion …	cell part;cytoplasmic part;cytosol;intracellular part;membrane	Endocytosis;Fc gamma R-mediated phagocytosis	3D-structure;Alternativesplicing;ANKrepeat;Ciliumbiogenesis/degradation;Completeproteome;Cytoplasm;GTPaseactivation;Membrane;Metal-binding;Phosphoprotein;Polymorphism;Referenceproteome;Repeat;SH3domain;Zinc;Zinc-finger	DDEF1-CTTN-PXN complex	PS50002;PS50003;PS50088;PS50115;PS50297	ANK_REP_REGION;ANK_REPEAT;ARFGAP;PH_DOMAIN;SH3	1	1.88108e-31	204.33	172.51	124.6	0.38555	1514200000	0.157146	0.501945	0.049713	Q9ULH1
0.981761	1.00997	1.02765	1.01733	1.03006	1.02473	1.01975	1.01502	1.0209	0.995757	0.997287	0.974881	0.998358	1.00169	1.00856	0.999612	1.01573	1.02168	1.0788	0.99802	0.979753	1.00309	0.990545	0.95364	S	1709	3	___1	Cdc2 kinase substrate motif;CDK kinase substrate motif;CDK1,2,4,6 kinase substrate motif;ERK1,2 kinase substrate motif;Growth associated histone HI kinase substrate motif;GSK-3, ERK1, ERK2, CDK5 substrate motif;PKA kinase substrate motif;PKC kinase substrate motif;WW domain binding motif	+	CST;HTP	anatomical structure maturation;biological regulation;blood vessel maturation;defense response;defense response to bacterium;developmental maturation;developmental process;immune response;immune system process;innate immune response;multi-organism process;negative regulation of biological process;negative regulation of cell differentiation;negative regulation of cellular process;negative regulati…	binding;chromatin binding	cell part;chromatin;chromosomal part;cytoplasm;intracellular membrane-bounded organelle;intracellular organelle;intracellular organelle part;intracellular part;membrane;membrane-bounded organelle;nucleus;organelle;organelle part		Acetylation;Alternativesplicing;ANKrepeat;Coiledcoil;Completeproteome;Cytoplasm;Host-virusinteraction;Immunity;Innateimmunity;Nucleus;Phosphoprotein;Polymorphism;Referenceproteome;Repeat;RNA-binding		PS50084;PS50088;PS50297	ANK_REP_REGION;ANK_REPEAT;KH_TYPE_1	0.999997	0.00747485	99.688	56.818	76.679	-0.20649	835970000	0.241232	0.529671	0.0510357	O75179
0.989789	1.03049	1.03273	0.985835	1.00976	1.00159	1.02613	0.995222	1.09633	1.01234	0.984493	0.977393	1.01461	0.985524	1.00023	1.01565	1.02913	1.01096	0.890725	1.02368	1.09582	1.199	1.00359	1.01192	S	782	4	___1	b-Adrenergic Receptor kinase substrate motif;BARD1 BRCT domain binding motif;Casein kinase I substrate motif;Casein kinase II substrate motif;PKA kinase substrate motif;PKC kinase substrate motif	+	HTP	biological regulation;biosynthetic process;cellular biosynthetic process;cellular macromolecule biosynthetic process;cellular macromolecule metabolic process;cellular metabolic process;cellular nitrogen compound metabolic process;cellular process;cellular response to stimulus;estrogen receptor signaling pathway;intracellular receptor mediated signaling pathway;macromolecule biosynthetic process;m…	adenyl nucleotide binding;adenyl ribonucleotide binding;ATP binding;ATPase activity;ATPase activity, coupled;ATP-dependent helicase activity;ATP-dependent RNA helicase activity;binding;catalytic activity;estrogen receptor binding;helicase activity;hormone receptor binding;hydrolase activity;hydrolase activity, acting on acid anhydrides;hydrolase activity, acting on acid anhydrides, in phosphorus-…	cell part;cytoplasm;intracellular membrane-bounded organelle;intracellular non-membrane-bounded organelle;intracellular organelle;intracellular organelle part;intracellular part;membrane;membrane-bounded organelle;non-membrane-bounded organelle;nuclear part;nucleolus;nucleus;organelle;organelle part		Alternativesplicing;ATP-binding;Completeproteome;Helicase;Hydrolase;Nucleotide-binding;Nucleus;Phosphoprotein;Polymorphism;Referenceproteome;RNA-binding;Transcription;Transcriptionregulation		PS00039;PS51192;PS51194;PS51195	DEAD_ATP_HELICASE;HELICASE_ATP_BIND_1;HELICASE_CTER;Q_MOTIF	1	2.75547e-33	229.68	204.32	196.75	-0.43318	599220000	0.53466	0.233881	0.0623681	Q8TDD1
1.00231	0.994645	1.0012	1.0398	1.03502	1.01437	0.985596	1.04333	0.966402	0.963294	0.978502	1.03817	1.02096	0.963983	0.998936	1.08421	1.04699	1.02391	1.07779	0.990409	0.985965	0.942231	1.00023	0.970182	S	1939	3	___1	Casein kinase II substrate motif	+	CST;HTP	anatomical structure development;axon extension;biological regulation;cell growth;cell projection organization;cellular component movement;cellular component organization;cellular component organization at cellular level;cellular component organization or biogenesis;cellular component organization or biogenesis at cellular level;cellular process;cytoskeleton organization;cytoskeleton-dependent in…	structural molecule activity	cell junction;cell part;cell projection;cell projection part;cytoplasm;cytoplasmic part;cytoskeletal part;cytosol;dendritic spine;intracellular organelle part;intracellular part;macromolecular complex;membrane;microtubule;microtubule associated complex;neuron projection;neuron spine;organelle part;plasma membrane;postsynaptic density;protein complex;synapse part		Acetylation;Celljunction;Cellprojection;Completeproteome;Cytoplasm;Cytoskeleton;Directproteinsequencing;Microtubule;Phosphoprotein;Polymorphism;Referenceproteome;Repeat;S-nitrosylation;Synapse		PS00230	MAP1B_NEURAXIN	0.999959	1.96468e-09	133.84	92.641	131.82	-0.17156	122320000	0.764386	0.813052	0.0629542	P46821
0.979674	0.996219	1.01373	1.01781	0.999666	1.01275	1.00169	1.00884	1.00529	0.981718	0.996123	0.983912	1.04486	0.964203	0.997514	1.00286	1.02128	1.02532	0.896176	1.02241	1.07807	1.14537	1.02996	1.06133	S	107	4	___1	Casein kinase II substrate motif;ERK1,2 kinase substrate motif;GSK-3, ERK1, ERK2, CDK5 substrate motif;WW domain binding motif	+	HTP					Acetylation;Alternativesplicing;Completeproteome;Phosphoprotein;Referenceproteome		PS51673	SUZ	0.999999	3.17333e-79	298.15	276.55	260.87	0.98729	6090000000	0.205682	0.0618324	0.0641466	Q7Z422
0.957723	1.00308	1.01752	1.01345	0.999731	1.01759	1.00832	1.0129	1.044	1.00405	0.990272	0.983758	1.00845	1.0057	1.00756	1.0115	1.01164	1.00755	1.02052	1.02805	0.982858	0.9901	0.984033	0.992088	S	352	2	___1	Casein kinase I substrate motif;Casein kinase II substrate motif;ERK1,2 kinase substrate motif;Growth associated histone HI kinase substrate motif;GSK-3, ERK1, ERK2, CDK5 substrate motif;WW domain binding motif	+	CST;HTP	biological regulation;biosynthetic process;cellular biosynthetic process;cellular macromolecule biosynthetic process;cellular macromolecule metabolic process;cellular metabolic process;cellular nitrogen compound metabolic process;cellular process;macromolecule biosynthetic process;macromolecule metabolic process;metabolic process;nitrogen compound metabolic process;nucleic acid metabolic process;…		cell part;intracellular membrane-bounded organelle;intracellular organelle;intracellular organelle part;intracellular part;membrane-bounded organelle;nuclear body;nuclear part;nuclear speck;nucleoplasm part;nucleus;organelle;organelle part		Alternativesplicing;Completeproteome;Cyclin;Nucleus;Phosphoprotein;Proto-oncogene;Referenceproteome;Repeat;Transcription;Transcriptionregulation				0.999924	8.31544e-07	137.17	105.53	115.7	0.38619	487210000	0.910024	0.563436	0.0658631	Q9UK58
1.02098	1.00281	0.998505	1.01964	1.04669	1.02576	1.01166	1.05848	1.01127	0.991076	0.993606	0.970667	1.02305	0.997671	1.02012	0.995598	1.05613	1.01665	1.05018	1.03106	1.05813	0.93559	1.00511	0.997504	S	913	3	___1	Casein kinase II substrate motif;ERK1,2 kinase substrate motif;GSK-3, ERK1, ERK2, CDK5 substrate motif;PKA kinase substrate motif;WW domain binding motif	+	HTP	biological regulation;cellular process;cellular response to stimulus;intracellular signal transduction;positive regulation of catalytic activity;positive regulation of GTPase activity;positive regulation of hydrolase activity;positive regulation of molecular function;Ras protein signal transduction;regulation of biological process;regulation of catabolic process;regulation of catalytic activity;r…	binding;cation binding;enzyme activator activity;enzyme regulator activity;GTPase activator activity;GTPase regulator activity;ion binding;metal ion binding;nucleoside-triphosphatase regulator activity;PDZ domain binding;protein binding;protein domain specific binding	cell part;cytoplasmic part;cytosol;intracellular part		Alternativesplicing;Coiledcoil;Completeproteome;Directproteinsequencing;GTPaseactivation;Metal-binding;Phosphoprotein;Polymorphism;Referenceproteome;Zinc;Zinc-finger		PS00479;PS50081;PS50238;PS51741	F_BAR;RHOGAP;ZF_DAG_PE_1;ZF_DAG_PE_2	1	2.2401e-10	170.11	127.28	91.076	0.028358	65502000	0.186588	0.813735	0.0659659	Q52LW3
0.957093	0.980949	1.01131	0.98925	0.995152	0.998597	1.00355	0.961697	0.898905	0.973007	0.994703	1.04378	0.97633	0.921144	0.9857	1.06396	1.03334	0.997789	1.06955	1.34491	0.987076	0.700274	1.01275	1.23131	S	593	3	___1	Casein kinase II substrate motif;Cdc2 kinase substrate motif;CDK kinase substrate motif;CDK1,2,4,6 kinase substrate motif;ERK1,2 kinase substrate motif;GSK-3, ERK1, ERK2, CDK5 substrate motif;MAPKAPK2 kinase substrate motif;WW domain binding motif	+	HTP			cell part;contractile fiber part;costamere;cytoplasm;cytoplasmic part;cytoplasmic vesicle membrane;cytoplasmic vesicle part;intracellular membrane-bounded organelle;intracellular organelle;intracellular organelle part;intracellular part;membrane;membrane part;membrane-bounded organelle;nucleus;organelle;organelle membrane;organelle part;plasma membrane;plasma membrane part;sarcolemma;T-tubule;ves…		3D-structure;Acetylation;Alternativesplicing;Completeproteome;Nucleus;Phosphoprotein;Polymorphism;Referenceproteome		PS50106	PDZ	0.995497	3.29452e-06	124.2	98.049	64.121	-0.056368	200060000	0.713575	0.153664	0.0730719	Q8IVF2
1.02042	1.01053	1.02254	1.02227	1.06956	1.0306	1.01661	1.05645	1.00256	0.99217	0.991174	0.957455	0.997852	0.995187	1.00853	0.961028	1.05132	1.02295	1.06497	1.06742	1.05467	1.0193	1.00807	0.94248	S	154	2	___1	Casein kinase II substrate motif;ERK1,2 kinase substrate motif;G protein-coupled receptor kinase 1 substrate motif;GSK3 kinase substrate motif;GSK-3, ERK1, ERK2, CDK5 substrate motif;PKA kinase substrate motif;PKC kinase substrate motif;WW domain binding motif	+	CST;HTP	biosynthetic process;cell cycle phase;cell cycle process;cell division;cellular biosynthetic process;cellular component organization;cellular component organization at cellular level;cellular component organization or biogenesis;cellular component organization or biogenesis at cellular level;cellular macromolecule biosynthetic process;cellular macromolecule metabolic process;cellular metabolic pr…	binding;chromatin binding	cell part;cytoplasm;intracellular membrane-bounded organelle;intracellular organelle;intracellular organelle part;intracellular part;membrane;membrane-bounded organelle;nuclear part;nucleoplasm;nucleus;organelle;organelle part;plasma membrane		3D-structure;Alternativesplicing;Cellcycle;Celldivision;Completeproteome;DNAreplication;Mitosis;Nucleus;Phosphoprotein;Referenceproteome				0.998637	2.20107e-09	177.47	139.11	144.89	-0.93945	239990000	0.00014691	0.906109	0.0875411	Q9BTE3
0.967	1.00256	1.01784	1.00078	0.993067	1.0035	1.00932	0.971357	1.00877	0.98261	1.00986	1.02666	1.0243	0.975982	1.00582	1.03999	1.02908	1.02915	0.925702	0.977263	1.07657	1.06166	1.02276	1.06193	S	164	4	___1	Casein kinase II substrate motif;G protein-coupled receptor kinase 1 substrate motif;PKA kinase substrate motif;Pyruvate dehydrogenase kinase substrate motif	+	CST;HTP	biological regulation;biosynthetic process;cellular biosynthetic process;cellular macromolecule biosynthetic process;cellular macromolecule metabolic process;cellular metabolic process;cellular process;cellular protein metabolic process;gene expression;macromolecule biosynthetic process;macromolecule metabolic process;metabolic process;posttranscriptional regulation of gene expression;primary met…	binding;catalytic activity;GTP binding;GTPase activity;guanyl nucleotide binding;guanyl ribonucleotide binding;hydrolase activity;hydrolase activity, acting on acid anhydrides;hydrolase activity, acting on acid anhydrides, in phosphorus-containing anhydrides;nucleic acid binding;nucleoside-triphosphatase activity;nucleotide binding;purine nucleotide binding;purine ribonucleoside triphosphate bind…	cell part;cytoplasm;cytoplasmic part;cytosol;intracellular part	RNA transport	Completeproteome;Cytoplasm;Directproteinsequencing;GTP-binding;Initiationfactor;Nucleotide-binding;Phosphoprotein;Polymorphism;Proteinbiosynthesis;Referenceproteome		PS51722	G_TR_2	1	1.50581e-36	263.89	227.21	114.64	-0.43332	26333000000	0.360993	0.14287	0.0884086	O60841
0.884606	1.05695	1.01775	1.01333	0.942509	1.06438	1.01338	0.940873	0.99609	0.980163	1.00274	1.04284	1.00874	0.977373	1.01238	1.08517	1.00833	1.02976	1.09349	1.02893	0.960031	0.868389	0.974644	1.01869	S	327	2	___1	ERK1,2 kinase substrate motif;G protein-coupled receptor kinase 1 substrate motif;Growth associated histone HI kinase substrate motif;GSK3 kinase substrate motif;GSK-3, ERK1, ERK2, CDK5 substrate motif;WW domain binding motif	+	CST;HTP	biological regulation;cellular macromolecule metabolic process;cellular metabolic process;cellular nitrogen compound metabolic process;cellular process;cellular response to abiotic stimulus;cellular response to ionizing radiation;cellular response to radiation;cellular response to stimulus;cellular response to stress;DNA metabolic process;DNA recombination;DNA repair;double-strand break repair;do…	binding;DNA binding;double-stranded DNA binding;nucleic acid binding;RNA binding;single-stranded DNA binding;structure-specific DNA binding	cell part;intracellular membrane-bounded organelle;intracellular organelle;intracellular part;membrane-bounded organelle;nucleus;organelle		Alternativesplicing;Completeproteome;DNA-binding;DNAdamage;DNArecombination;DNArepair;Nucleus;Phosphoprotein;Polymorphism;Referenceproteome;RNA-binding				0.999996	1.32125e-25	195.36	170.49	98.73	0.40009	185130000	0.684716	0.238284	0.0884492	Q96B01
0.955898	1.00323	1.0204	1.01022	0.976913	1.00985	1.01249	1.01241	1.02443	0.988115	0.996243	1.0093	1.0185	0.988173	1.00344	1.02522	1.04066	1.0192	0.98332	0.972573	1.09494	1.08471	1.0153	1.01811	S	1058	3	___1	14-3-3 domain binding motif;BARD1 BRCT domain binding motif;Calmodulin-dependent protein kinase II substrate motif;Casein kinase II substrate motif;DNA dependent Protein kinase substrate motif;G protein-coupled receptor kinase 1 substrate motif;PKA kinase substrate motif;PKC epsilon kinase substrate motif;PKC kinase substrate motif	+	CST;HTP			cell part;cytoplasm;intracellular part;membrane;plasma membrane		3D-structure;Alternativesplicing;Coiledcoil;Completeproteome;Cytoplasm;Membrane;Phosphoprotein;Polymorphism;Referenceproteome		PS50021	CH	1	6.70365e-40	233.3	207.49	95.981	0.045677	4729100000	0.0999497	0.0846952	0.0906179	Q8NDI1
0.935873	1.00475	1.00691	1.01437	0.979413	1.00204	1.00276	0.974183	1.02572	0.975402	0.988967	1.03681	1.03146	0.961295	0.992911	1.06003	1.0675	1.01185	0.942813	0.992807	1.15884	1.05236	1.06385	1.07252	S	613	3	___1	14-3-3 domain binding motif;Calmodulin-dependent protein kinase II substrate motif;MAPKAPK2 kinase substrate motif;PKA kinase substrate motif;PKC kinase substrate motif	+	CST;HTP	alcohol biosynthetic process;alcohol metabolic process;biological regulation;biosynthetic process;carbohydrate biosynthetic process;carbohydrate homeostasis;carbohydrate metabolic process;cellular biosynthetic process;cellular carbohydrate biosynthetic process;cellular carbohydrate metabolic process;cellular component assembly;cellular component organization;cellular component organization at cel…	cAMP response element binding protein binding;protein binding transcription factor activity;transcription coactivator activity;transcription cofactor activity;transcription factor binding transcription factor activity	cell part;cytoplasm;extracellular membrane-bounded organelle;extracellular organelle;extracellular region part;extracellular vesicular exosome;intracellular organelle part;intracellular part;membrane-bounded organelle;membrane-bounded vesicle;nuclear part;nucleoplasm;organelle;organelle part;vesicle		3D-structure;Acetylation;Activator;Completeproteome;Cytoplasm;Host-virusinteraction;Methylation;Nucleus;Phosphoprotein;Polymorphism;Referenceproteome;Transcription;Transcriptionregulation				0.999997	2.56729e-06	104.38	91.616	98	-0.52803	946700000	0.0728099	0.155022	0.091982	Q53ET0
0.981936	0.99253	1.01316	1.05694	1.02703	1.01292	1.00046	1.02253	0.953761	0.991898	0.981567	0.978577	0.989561	0.973815	0.985779	1.02743	1.06168	1.00122	1.07423	1.03864	1.04062	0.877727	1.00799	1.07617	S	1221	3	___1	Casein kinase II substrate motif;PKA kinase substrate motif;PKC kinase substrate motif;Pyruvate dehydrogenase kinase substrate motif	+	CST;HTP	actin cytoskeleton organization;actin filament-based process;anatomical structure development;anatomical structure formation involved in morphogenesis;anatomical structure morphogenesis;apical protein localization;asymmetric protein localization;biological regulation;cell development;cell morphogenesis;cellular component morphogenesis;cellular component organization;cellular component organizatio…		adherens junction;anchoring junction;apical junction complex;apical plasma membrane;cell junction;cell part;cell-cell junction;cytoplasm;cytoskeletal part;cytoskeleton;intracellular non-membrane-bounded organelle;intracellular organelle;intracellular organelle part;intracellular part;macromolecular complex;membrane part;microtubule;non-membrane-bounded organelle;organelle;organelle part;plasma me…		Actin-binding;Alternativesplicing;Celljunction;Cellshape;Completeproteome;Cytoplasm;Cytoskeleton;Developmentalprotein;Microtubule;Phosphoprotein;Polymorphism;Referenceproteome		PS50106;PS51306;PS51307	ASD1;ASD2;PDZ	0.965762	6.13639e-14	155.68	139.73	155.68	-1.4425	379910000	0.247457	0.397939	0.0920608	Q8TF72
0.946992	0.977899	1.00959	1.02814	0.990515	1.00332	0.989365	0.984629	0.944743	0.979859	0.983261	1.03156	1.0196	0.978972	1.00331	1.07674	1.0196	0.994851	1.09582	0.986302	0.995264	0.853455	1.00343	1.0801	S	25	3	___1	Casein kinase II substrate motif;G protein-coupled receptor kinase 1 substrate motif	+	CST;HTP	actin cytoskeleton organization;actin filament capping;actin filament organization;actin filament-based process;actomyosin structure organization;anatomical structure development;anatomical structure formation involved in morphogenesis;biological regulation;cell development;cellular component assembly;cellular component assembly at cellular level;cellular component assembly involved in morphogene…	binding;cytoskeletal protein binding;protein binding;tropomyosin binding	cell part;contractile fiber part;cytoplasmic part;cytoskeletal part;intracellular organelle part;intracellular part;organelle part;striated muscle thin filament		Actin-binding;Completeproteome;Cytoplasm;Cytoskeleton;Directproteinsequencing;Phosphoprotein;Referenceproteome				0.999468	8.42266e-28	202.82	170.43	154.55	0.53705	792390000	0.872379	0.63548	0.0933019	Q9NYL9
1.00857	1.00227	1.01629	1.02031	1.04639	1.02008	1.01218	1.05061	0.957639	0.990584	0.993748	0.936607	0.974442	0.966727	0.988886	0.95329	1.07829	0.992469	1.04385	0.995678	1.0394	0.912939	0.965094	0.951105	S	26	2	___1	AMP-activated protein kinase substrate motif;Casein kinase II substrate motif	+	HTP	anatomical structure development;biological regulation;cell communication;cell surface receptor linked signaling pathway;cell-cell signaling;cellular metabolic process;cellular process;cellular response to chemical stimulus;cellular response to endogenous stimulus;cellular response to glucagon stimulus;cellular response to hormone stimulus;cellular response to organic substance;cellular response …	anion binding;binding;ion binding;molecular transducer activity;PDZ domain binding;phosphate ion binding;protein binding;protein domain specific binding;signal transducer activity	actin filament;cell part;cytoskeletal part;extracellular membrane-bounded organelle;extracellular organelle;extracellular region part;extracellular vesicular exosome;extrinsic to internal side of plasma membrane;extrinsic to membrane;extrinsic to plasma membrane;heterotrimeric G-protein complex;intracellular organelle part;intracellular part;macromolecular complex;membrane;membrane part;membrane-…	Chemokine signaling pathway;MAPK signaling pathway;Regulation of actin cytoskeleton	Acetylation;Cellmembrane;Completeproteome;Lipoprotein;Membrane;Methylation;Phosphoprotein;Prenylation;Referenceproteome;Transducer		PS50058	G_PROTEIN_GAMMA	1	0.00022357	112.13	78.717	87.568	-0.21908	379690000	0.0152173	0.491243	0.09335	Q9UBI6
0.983354	1.00706	1.02501	1.00671	1.02409	1.0236	1.01739	0.999768	1.04485	0.999524	0.987131	0.999426	1.01855	0.98543	1.00986	1.01104	1.05636	1.04747	1.0455	0.988782	1.02586	0.957377	0.991836	0.978962	S	429	2	___1	Casein kinase I substrate motif;Casein kinase II substrate motif;ERK1,2 kinase substrate motif;G protein-coupled receptor kinase 1 substrate motif;GSK-3, ERK1, ERK2, CDK5 substrate motif;MDC1 BRCT domain binding motif;Plk1 PBD domain binding motif;WW domain binding motif	+	CST;HTP	biological regulation;biosynthetic process;cell cycle;cellular biosynthetic process;cellular component assembly;cellular component assembly at cellular level;cellular component organization;cellular component organization at cellular level;cellular component organization or biogenesis;cellular component organization or biogenesis at cellular level;cellular macromolecular complex assembly;cellular…	binding;chromatin binding;histone binding;protein binding;unfolded protein binding	CAF-1 complex;cell part;chromatin;chromatin assembly complex;chromosomal part;cytoplasm;intracellular membrane-bounded organelle;intracellular organelle;intracellular organelle part;intracellular part;macromolecular complex;membrane-bounded organelle;nuclear chromatin;nuclear chromosome part;nuclear part;nucleoplasm;nucleus;organelle;organelle part;protein complex		Acetylation;Cellcycle;Completeproteome;Cytoplasm;Directproteinsequencing;DNAdamage;DNArepair;DNAreplication;Nucleus;Phosphoprotein;Polymorphism;Referenceproteome;Repeat;Transcription;Transcriptionregulation;WDrepeat	ASF1-histone containing complex;ASF1-interacting protein complex;Chromatin assembly complex (CAF-1 complex);Histone H3.1 complex	PS00678;PS50082;PS50294	WD_REPEATS_1;WD_REPEATS_2;WD_REPEATS_REGION	0.993403	4.58484e-40	261.79	223.02	261.79	-0.38032	493180000	0.746251	0.311163	0.0969881	Q13112
0.985694	1.01054	1.02454	0.976876	1.00945	1.00972	1.01189	0.948482	1.02248	0.962065	1.01188	0.994383	1.02696	0.957469	1.01181	1.00646	1.04423	1.0554	0.854904	0.977514	1.09733	1.11018	1.03559	1.00097	S	89	2	___1	14-3-3 domain binding motif;AMP-activated protein kinase substrate motif;Calmodulin-dependent protein kinase I substrate motif;Calmodulin-dependent protein kinase II substrate motif;Calmodulin-dependent protein kinase IV substrate motif;Casein kinase II substrate motif;Chk1 kinase substrate motif;HMGCoA Reductase kinase substrate motif;MDC1 BRCT domain binding motif;PKA kinase substrate motif;PKC…	+	CST;HTP	biological regulation;cellular process;establishment of localization;establishment of localization in cell;establishment of protein localization;establishment of protein localization in Golgi;establishment of protein localization to organelle;Golgi to plasma membrane protein transport;Golgi to plasma membrane transport;Golgi vesicle transport;intracellular protein transport;intracellular transpor…	binding;enzyme binding;GTPase binding;protein binding	cell part;cytoplasm;cytoplasmic part;extracellular membrane-bounded organelle;extracellular organelle;extracellular region part;extracellular vesicular exosome;Golgi apparatus;Golgi apparatus part;Golgi membrane;intracellular membrane-bounded organelle;intracellular organelle;intracellular organelle part;intracellular part;membrane;membrane-bounded organelle;membrane-bounded vesicle;nuclear part;…		3D-structure;Alternativesplicing;Coiledcoil;Completeproteome;Cytoplasm;Glycoprotein;Golgiapparatus;Membrane;Phosphoprotein;Polymorphism;Referenceproteome		PS50913	GRIP	0.998367	5.3064e-05	153.33	112.21	153.33	2.6161	2255500000	0.46789	0.185986	0.0989517	Q13439
0.981423	0.998404	1.05949	0.994841	1.00693	1.00042	1.0323	0.976446	1.09093	1.00668	1.00518	0.978834	1.03378	0.992855	1.03026	0.989969	1.02503	1.02561	0.850367	0.907008	1.03434	1.09186	1.01602	0.980606	S	275	3	___1	Casein kinase I substrate motif;Casein kinase II substrate motif;PKA kinase substrate motif;PKC kinase substrate motif	+	CST;HTP	cation transport;cellular process;divalent inorganic cation transport;divalent metal ion transport;establishment of localization;ion transport;metal ion transport;transition metal ion transport;transmembrane transport;transport;zinc ion transport	cation transmembrane transporter activity;ion transmembrane transporter activity;metal ion transmembrane transporter activity;substrate-specific transmembrane transporter activity;substrate-specific transporter activity;transmembrane transporter activity;transporter activity	cell part;cytoplasmic part;endoplasmic reticulum;endoplasmic reticulum membrane;endoplasmic reticulum part;Golgi apparatus;integral to membrane;intracellular membrane-bounded organelle;intracellular organelle;intracellular organelle part;intracellular part;intrinsic to membrane;membrane;membrane part;membrane-bounded organelle;nuclear part;nucleoplasm;organelle;organelle membrane;organelle part		Completeproteome;Endoplasmicreticulum;Golgiapparatus;Iontransport;Isopeptidebond;Membrane;Phosphoprotein;Polymorphism;Referenceproteome;Transmembrane;Transmembranehelix;Transport;Ublconjugation;Zinc;Zinctransport				0.985467	3.55729e-09	150.91	117.91	150.91	0.22692	1346400000	0.660674	0.23493	0.0998228	Q92504
0.995999	0.986612	1.0122	1.02722	1.03464	1.02196	1.00464	1.03198	0.916618	0.974941	1.00152	0.996634	0.997581	0.961808	1.00517	1.01253	1.04059	1.00916	0.971846	0.951368	1.19591	1.05163	1.04175	1.02149	S	872	3	___1	Aurora-A kinase substrate motif;b-Adrenergic Receptor kinase substrate motif;Calmodulin-dependent protein kinase II substrate motif;Casein kinase II substrate motif;PAK2 kinase substrate motif;Phosphorylase kinase substrate motif;PKA kinase substrate motif;PKC kinase substrate motif	+	CST;HTP	anatomical structure homeostasis;biological regulation;biosynthetic process;catabolic process;cellular biosynthetic process;cellular catabolic process;cellular component organization;cellular component organization at cellular level;cellular component organization or biogenesis;cellular component organization or biogenesis at cellular level;cellular macromolecule biosynthetic process;cellular mac…	ankyrin binding;binding;cytoskeletal protein binding;enzyme binding;protein binding	CCR4-NOT complex;cell part;chromatin;chromosomal part;cytoplasm;cytoplasmic part;cytoskeleton;cytosol;heterochromatin;intracellular membrane-bounded organelle;intracellular non-membrane-bounded organelle;intracellular organelle;intracellular organelle part;intracellular part;macromolecular complex;membrane;membrane-bounded organelle;non-membrane-bounded organelle;nuclear chromatin;nuclear chromos…		ADP-ribosylation;Alternativesplicing;Chromosome;Completeproteome;Cytoplasm;Cytoskeleton;Nucleus;Phosphoprotein;Polymorphism;Referenceproteome				0.999996	6.66337e-54	254.6	227.84	237.2	-0.053658	1876800000	0.0543725	0.0214081	0.100502	Q9C0C2
0.959821	0.986182	1.03287	1.02908	0.975888	1.01281	1.0329	0.971339	1.06094	0.99291	1.02418	1.01121	1.00666	1.01948	1.04266	1.04676	1.0957	1.04361	1.05596	0.978959	1.02476	0.925819	0.959866	0.954086	S	807	3	___1	Cdc2 kinase substrate motif;CDK kinase substrate motif;CDK1,2,4,6 kinase substrate motif;ERK1,2 kinase substrate motif;G protein-coupled receptor kinase 1 substrate motif;GSK3 kinase substrate motif;GSK-3, ERK1, ERK2, CDK5 substrate motif;WW domain binding motif	+	CST;HTP;LTP	anatomical structure development;anatomical structure morphogenesis;androgen receptor signaling pathway;apoptosis;attachment of spindle microtubules to chromosome;biological regulation;biosynthetic process;cell cycle;cell cycle arrest;cell cycle checkpoint;cell cycle process;cell death;cell differentiation;cell division;cell maturation;cell morphogenesis;cell morphogenesis involved in differentia…	androgen receptor binding;binding;core promoter binding;DNA binding;enzyme binding;hormone receptor binding;identical protein binding;kinase binding;nuclear hormone receptor binding;nucleic acid binding;nucleic acid binding transcription factor activity;phosphoprotein binding;protein binding;protein binding transcription factor activity;receptor binding;regulatory region DNA binding;regulatory re…	cell part;chromatin;chromatin remodeling complex;chromosomal part;cytoskeletal part;intracellular membrane-bounded organelle;intracellular non-membrane-bounded organelle;intracellular organelle;intracellular organelle part;intracellular part;macromolecular complex;membrane-bounded organelle;non-membrane-bounded organelle;nuclear body;nuclear part;nucleoplasm;nucleoplasm part;nucleus;organelle;org…	Bladder cancer;Cell cycle;Chronic myeloid leukemia;Glioma;Melanoma;Non-small cell lung cancer;Pancreatic cancer;Pathways in cancer;Prostate cancer;Small cell lung cancer	3D-structure;Acetylation;Cellcycle;Chromatinregulator;Completeproteome;Directproteinsequencing;Diseasemutation;DNA-binding;Host-virusinteraction;Methylation;Nucleus;Phosphoprotein;Polymorphism;Proto-oncogene;Referenceproteome;Repressor;Transcription;Transcriptionregulation	CEBPE-E2F1-RB1 complex;DNMT1-RB1-HDAC1-E2F1 complex;E2F1-Rb complex;Emerin complex 24;MAF1 complex;MRG15-PAM14-RB complex;pRB-E2F-1 complex;RB1(hypophosphorylated)-E2F4 complex;RB1-HDAC1-BRG1 complex;RB1-TFAP2A complex;Rb-HDAC1 complex;Rb-tal-1-E2A-Lmo2-Ldb1 complex;TRIM27-RB1 complex			0.99947	0.000404779	99.891	78.433	64.394	0.54534	130950000	0.387095	0.182235	0.100511	P06400
0.99463	1.00399	1.00957	1.02173	1.0314	1.01845	1.03357	0.999134	1.02092	1.00695	0.980387	0.987869	1.04571	1.00529	0.970573	1.02508	1.07207	1.03431	1.10427	1.02253	1.0634	0.881769	1.01723	0.956512	S	232	3	___1	14-3-3 domain binding motif;Aurora-A kinase substrate motif;Calmodulin-dependent protein kinase II substrate motif;Casein kinase II substrate motif;G protein-coupled receptor kinase 1 substrate motif;GSK3 kinase substrate motif;PAK2 kinase substrate motif;Phosphorylase kinase substrate motif;PKA kinase substrate motif;PKC epsilon kinase substrate motif;PKC kinase substrate motif	+	CST;HTP					Acetylation;Completeproteome;Phosphoprotein;Polymorphism;Referenceproteome				0.999954	2.52477e-10	151.41	119.14	69.975	-0.93857	136800000	0.559424	0.437553	0.100936	Q9NYF3
0.987409	1.01382	1.02482	1.00378	1.01691	1.01023	1.02062	1.00829	1.00916	0.992797	0.996582	0.978377	1.00671	0.976152	1.00681	0.990112	1.04736	1.03622	1.03032	0.993888	1.08614	1.08796	1.02992	1.01248	T	347	2	___1	Casein kinase II substrate motif;ERK1,2 kinase substrate motif;G protein-coupled receptor kinase 1 substrate motif;Growth associated histone HI kinase substrate motif;GSK3, Erk1, Erk2 and CDK5 kinase motif;GSK-3, ERK1, ERK2, CDK5 substrate motif;WW domain binding motif	+	HTP	apoptosis;cell death;cellular process;death;localization;macromolecule localization;programmed cell death;protein localization		adherens junction;anchoring junction;cell junction;cell part;cell-substrate adherens junction;cell-substrate junction;cytoplasm;cytoskeleton;focal adhesion;intracellular non-membrane-bounded organelle;intracellular organelle;intracellular part;non-membrane-bounded organelle;organelle		Actin-binding;Apoptosis;Celljunction;Completeproteome;Cytoplasm;Cytoskeleton;Phosphoprotein;Polymorphism;Referenceproteome;SH2domain;Signal		PS50001	SH2	0.999549	0.00333727	101.99	56.676	101.99	-1.8211	350620000	0.000245641	0.129559	0.104686	Q8IZW8
1.01418	0.982177	1.00529	0.99024	1.04414	1.02494	1.00195	0.994066	0.950205	0.949901	0.988062	0.966921	1.0052	0.939093	0.980344	0.98623	1.03227	1.00393	1.15957	1.00878	1.01304	0.809855	1.03412	1.02861	T	331	2	___1	Casein kinase I substrate motif;Casein kinase II substrate motif;Growth associated histone HI kinase substrate motif;GSK-3, ERK1, ERK2, CDK5 substrate motif;PKA kinase substrate motif;PKC kinase substrate motif;WW domain binding motif	+	CST;HTP	biological regulation;cellular process;endosome transport;establishment of localization;establishment of localization in cell;establishment of protein localization;intracellular transport;negative regulation of barbed-end actin filament capping;negative regulation of biological process;negative regulation of cellular component organization;protein transport;regulation of barbed-end actin filament…	binding;lipid binding;phosphatidylinositol binding;phosphatidylinositol-3,4,5-trisphosphate binding;phosphatidylinositol-3,4-bisphosphate binding;phosphatidylinositol-3,5-bisphosphate binding;phosphatidylinositol-3-phosphate binding;phosphatidylinositol-4,5-bisphosphate binding;phosphatidylinositol-4-phosphate binding;phosphatidylinositol-5-phosphate binding;phospholipid binding	cell part;cytoplasmic part;early endosome;early endosome membrane;endosomal part;endosome;endosome membrane;intracellular membrane-bounded organelle;intracellular organelle;intracellular organelle part;intracellular part;macromolecular complex;membrane;membrane-bounded organelle;organelle;organelle membrane;organelle part;plasma membrane;protein complex;WASH complex		Alternativesplicing;Cellmembrane;Completeproteome;Endosome;Lipid-binding;Membrane;Phosphoprotein;Proteintransport;Referenceproteome;Transport				0.758059	1.85456e-19	196.48	171.26	196.48	0.25466	292230000	0.333333	0.411839	0.1049	Q641Q2;Q9Y4E1
0.963347	1.01163	1.03345	1.0244	1.01234	1.0376	1.01852	0.992062	1.0105	0.977829	1.00943	1.04138	1.03248	0.982371	1.01643	1.06696	1.02223	1.02026	0.86751	1.01472	1.07951	1.16645	1.02133	1.08893	S	365	3	___1	14-3-3 domain binding motif;Calmodulin-dependent protein kinase II substrate motif;Casein kinase II substrate motif;PKA kinase substrate motif;PKC epsilon kinase substrate motif;PKC kinase substrate motif	+	HTP	activation of MAPK activity;activation of MAPKK activity;activation of protein kinase activity;anatomical structure development;anatomical structure formation involved in morphogenesis;anatomical structure morphogenesis;anterior/posterior axis specification;anterior/posterior axis specification, embryo;axis specification;biological regulation;branching involved in prostate gland morphogenesis;car…	binding;binding, bridging;cytokine receptor binding;enzyme activator activity;enzyme regulator activity;fibroblast growth factor receptor binding;growth factor receptor binding;neurotrophin receptor binding;neurotrophin TRK receptor binding;neurotrophin TRKA receptor binding;phosphatase activator activity;phosphatase regulator activity;protein binding;protein binding, bridging;receptor binding;re…	cell junction;cell part;cell-cell junction;cytoplasmic part;endosome;integral to membrane;integral to plasma membrane;intracellular membrane-bounded organelle;intracellular organelle;intracellular part;intrinsic to membrane;intrinsic to plasma membrane;membrane;membrane part;membrane-bounded organelle;organelle;plasma membrane;plasma membrane part	Neurotrophin signaling pathway	3D-structure;Completeproteome;Lipoprotein;Membrane;Myristate;Phosphoprotein;Polymorphism;Referenceproteome;Ublconjugation		PS51064	IRS_PTB	1	3.0496e-09	152.32	136.18	114.63	-0.03471	1038600000	0.80979	0.0633639	0.105288	Q8WU20
0.947916	1.00716	1.03712	1.01198	1.03348	1.05386	1.03296	1.00286	1.03651	0.984382	0.97345	1.03046	0.998036	0.995949	0.991386	1.0271	1.02476	1.04473	1.00515	1.00769	1.0447	1.10921	1.08986	1.00344	S	548	2	___1	14-3-3 domain binding motif;Calmodulin-dependent protein kinase II substrate motif;Calmodulin-dependent protein kinase IV substrate motif;Chk1 kinase substrate motif;PKA kinase substrate motif;PKC kinase substrate motif	+	HTP	biological regulation;regulation of biological process;regulation of cellular component organization;regulation of cellular process;regulation of cytoskeleton organization;regulation of organelle organization;regulation of response to stimulus;regulation of signal transduction;regulation of signaling		actin cytoskeleton;adherens junction;anchoring junction;cell junction;cell part;cell-substrate adherens junction;cell-substrate junction;cytoplasm;cytoskeleton;focal adhesion;intracellular non-membrane-bounded organelle;intracellular organelle;intracellular part;non-membrane-bounded organelle;organelle		Acetylation;Actin-binding;Alternativesplicing;Coiledcoil;Completeproteome;Cytoplasm;Cytoskeleton;Phosphoprotein;Polymorphism;Referenceproteome;Repeat		PS50003	PH_DOMAIN	0.997188	0.000144708	137.92	79.736	105.36	0.42656	1948000000	0.0244648	0.0407187	0.106392	Q8N556
0.998788	0.997758	1.02592	1.01369	0.966317	1.01514	1.02236	0.954157	0.998083	0.980683	1.00383	0.986658	1.03401	0.969443	1.00247	1.00546	1.05365	1.04058	0.859083	1.03321	1.12189	1.23913	0.985534	1.03294	S	1410	4	___1	ATM kinase substrate motif;DNA dependent Protein kinase substrate motif	+	CST;HTP;LTP	anatomical structure development;biosynthetic process;cellular biosynthetic process;cellular macromolecule biosynthetic process;cellular macromolecule metabolic process;cellular metabolic process;cellular nitrogen compound metabolic process;cellular process;developmental process;macromolecule biosynthetic process;macromolecule metabolic process;metabolic process;nitrogen compound metabolic proces…	transporter activity	cell part;cytoplasm;intracellular membrane-bounded organelle;intracellular non-membrane-bounded organelle;intracellular organelle;intracellular organelle part;intracellular part;membrane-bounded organelle;non-membrane-bounded organelle;nuclear part;nucleolus;nucleus;organelle;organelle part	Ribosome biogenesis in eukaryotes	Acetylation;Alternativesplicing;Completeproteome;Directproteinsequencing;Diseasemutation;Nucleus;Phosphoprotein;Polymorphism;Referenceproteome;Transport	Nop56p-associated pre-rRNA complex	PS50896	LISH	0.998789	3.21149e-41	220.52	198.44	145.52	-0.097499	112930000	0.238583	0.267588	0.10742	Q13428
0.943307	0.992216	1.01049	1.02622	0.967237	1.01173	0.999751	0.975456	1.00282	0.984551	0.978716	1.0399	1.04547	0.964444	0.993458	1.06209	1.05163	0.998895	0.922926	1.00781	1.1297	1.0637	1.04375	1.0774	S	680	5	___1	Casein kinase II substrate motif;ERK1,2 kinase substrate motif;Growth associated histone HI kinase substrate motif;GSK-3, ERK1, ERK2, CDK5 substrate motif;WW domain binding motif	+	CST;HTP	anatomical structure development;anatomical structure morphogenesis;biological regulation;brain development;camera-type eye development;cell cycle process;cell part morphogenesis;cell projection morphogenesis;cell projection organization;cell proliferation;cellular component morphogenesis;cellular component organization;cellular component organization at cellular level;cellular component organiza…	binding;intermediate filament binding;protein binding;protein complex binding;structural molecule activity	cell part;cytoplasm;cytoskeletal part;cytoskeleton;intermediate filament;intermediate filament cytoskeleton;intracellular non-membrane-bounded organelle;intracellular organelle;intracellular organelle part;intracellular part;macromolecular complex;non-membrane-bounded organelle;organelle;organelle part;protein complex		Acetylation;Coiledcoil;Completeproteome;Developmentalprotein;Intermediatefilament;Neurogenesis;Phosphoprotein;Polymorphism;Referenceproteome		PS00226	IF	1	1.13059e-53	243.78	225.27	145.65	0.14862	4463900000	0.169328	0.121583	0.108811	P48681
0.96594	1.03413	1.02463	1.01693	1.02517	1.00799	1.0107	0.993493	1.07151	1.0104	0.964743	0.946463	1.00542	1.00952	1.02188	0.996787	1.07473	1.02987	1.10903	1.05462	1.03432	0.994922	0.992698	0.946169	S	86	3	___1	Casein kinase II substrate motif;Pyruvate dehydrogenase kinase substrate motif	+	CST;HTP	anatomical structure development;axon guidance;biological regulation;biosynthetic process;catabolic process;cell cycle checkpoint;cell cycle process;cellular biosynthetic process;cellular catabolic process;cellular component assembly;cellular component assembly at cellular level;cellular component disassembly;cellular component disassembly at cellular level;cellular component organization;cellula…	binding;nucleic acid binding;RNA binding;structural constituent of ribosome;structural molecule activity	cell part;cytoplasmic part;cytosol;cytosolic large ribosomal subunit;extracellular membrane-bounded organelle;extracellular organelle;extracellular region part;extracellular vesicular exosome;intracellular organelle part;intracellular part;large ribosomal subunit;macromolecular complex;membrane;membrane-bounded organelle;membrane-bounded vesicle;organelle;organelle part;ribonucleoprotein complex;…	Ribosome	3D-structure;Acetylation;Completeproteome;Directproteinsequencing;Phosphoprotein;Referenceproteome;Ribonucleoprotein;Ribosomalprotein	60S ribosomal subunit, cytoplasmic;Nop56p-associated pre-rRNA complex;Ribosome, cytoplasmic	PS01073	RIBOSOMAL_L24E	0.997732	0.000104772	81.632	60.73	81.619	-0.20255	44805000	0.0780819	0.225161	0.111765	P83731
0.980301	0.977946	0.999862	1.00379	1.03747	1.05178	1.01407	1.01782	1.06549	0.96948	0.986145	1.01065	1.04566	0.987002	1.01492	1.00691	1.08026	0.996552	1.11945	1.01101	1.04307	0.978619	1.01066	0.959453	S	37	3	___1	b-Adrenergic Receptor kinase substrate motif;Casein kinase I substrate motif;ERK1,2 kinase substrate motif;G protein-coupled receptor kinase 1 substrate motif;GSK-3, ERK1, ERK2, CDK5 substrate motif;WW domain binding motif	+	CST;HTP;LTP	alcohol metabolic process;carbohydrate metabolic process;cell death;cellular carbohydrate metabolic process;cellular metabolic process;cellular process;death;glucose metabolic process;hexose metabolic process;metabolic process;monosaccharide metabolic process;primary metabolic process;programmed cell death;small molecule metabolic process	adenyl nucleotide binding;adenyl ribonucleotide binding;alkali metal ion binding;antigen binding;ATP binding;binding;catalytic activity;cation binding;ion binding;kinase activity;magnesium ion binding;metal ion binding;MHC class II protein complex binding;MHC protein complex binding;nucleotide binding;phosphotransferase activity, alcohol group as acceptor;potassium ion binding;purine nucleotide b…	cell part;cell projection;cilium;cytoplasm;cytoplasmic part;cytosol;extracellular matrix;extracellular membrane-bounded organelle;extracellular organelle;extracellular region part;extracellular vesicular exosome;intracellular membrane-bounded organelle;intracellular organelle;intracellular part;membrane;membrane-bounded organelle;membrane-bounded vesicle;mitochondrion;nucleus;organelle;plasma mem…	Carbon fixation in photosynthetic organisms;Glycolysis / Gluconeogenesis;Purine metabolism;Pyruvate metabolism;Type II diabetes mellitus	3D-structure;Acetylation;Allostericenzyme;Alternativesplicing;ATP-binding;Completeproteome;Cytoplasm;Directproteinsequencing;Glycolysis;Hydroxylation;Kinase;Magnesium;Metal-binding;Nucleotide-binding;Nucleus;Phosphoprotein;Polymorphism;Potassium;Pyruvate;Referenceproteome;Transferase;Ublconjugation		PS00110	PYRUVATE_KINASE	0.999996	0.000672755	76.563	58.791	76.563	-0.43337	79152000	0.349511	0.883646	0.112725	P14618
0.928007	1.01471	1.07766	1.04653	0.92639	0.976718	1.00277	0.952889	0.873257	0.996508	1.0329	1.01406	0.958189	0.953628	1.0265	1.01284	1.01066	1.04328	0.872922	0.697093	1.02792	1.03367	1.05339	1.0767	S	140	3	___1	14-3-3 domain binding motif;Akt kinase substrate motif;Calmodulin-dependent protein kinase II substrate motif;Casein kinase II substrate motif;CLK1 kinase substrate motif;MAPKAPK1 kinase substrate motif;PKA kinase substrate motif;PKC kinase substrate motif	+	HTP;LTP	biosynthetic process;cellular biosynthetic process;cellular macromolecule biosynthetic process;cellular macromolecule metabolic process;cellular metabolic process;cellular nitrogen compound metabolic process;cellular process;establishment of localization;establishment of localization in cell;establishment of RNA localization;gene expression;intracellular transport;macromolecule biosynthetic proce…	binding;nucleic acid binding;nucleotide binding;RNA binding	cell part;cytoplasm;intracellular organelle part;intracellular part;nuclear part;nucleoplasm;organelle part	Spliceosome	3D-structure;Acetylation;Alternativesplicing;Completeproteome;Cytoplasm;Directproteinsequencing;mRNAprocessing;mRNAsplicing;mRNAtransport;Nucleus;Phosphoprotein;Referenceproteome;Repeat;RNA-binding;Transport	Spliceosome	PS50102	RRM	0.999976	0.00347609	81.263	21.333	80.916	-0.61814	600590000	0.789838	0.452243	0.113599	P84103
1.05093	1.01666	1.01792	1.05514	1.10972	1.06117	1.01638	1.03591	1.01254	0.993945	0.972225	0.960272	1.01464	1.00954	1.03454	0.991942	1.07378	1.06961	1.09479	0.987085	1.04042	1.02115	0.991095	0.956503	S	588	3	___1	Casein kinase II substrate motif;PKA kinase substrate motif;PKC kinase substrate motif	+	CST;HTP	anatomical structure formation involved in morphogenesis;angiogenesis;biological regulation;biosynthetic process;cell differentiation;cellular biosynthetic process;cellular developmental process;cellular macromolecule biosynthetic process;cellular macromolecule metabolic process;cellular metabolic process;cellular nitrogen compound metabolic process;cellular process;cellular protein metabolic pro…	acetyltransferase activity;binding;catalytic activity;N-acetyltransferase activity;N-acyltransferase activity;ribonucleoprotein binding;ribosome binding;transferase activity;transferase activity, transferring acyl groups;transferase activity, transferring acyl groups other than amino-acyl groups	cell part;cytoplasm;cytoplasmic part;intracellular membrane-bounded organelle;intracellular organelle;intracellular organelle part;intracellular part;macromolecular complex;membrane;membrane-bounded organelle;NatA complex;N-terminal protein acetyltransferase complex;nuclear part;nucleoplasm part;nucleus;organelle;organelle part;protein acetyltransferase complex;protein complex;transcription facto…		Acetylation;Alternativesplicing;Angiogenesis;Completeproteome;Cytoplasm;Developmentalprotein;Differentiation;Nucleus;Phosphoprotein;Referenceproteome;Repeat;TPRrepeat;Transcription;Transcriptionregulation	ARD1-NATH complex;Ku antigen-NARG1 complex	PS50005;PS50293	TPR;TPR_REGION	0.999397	0.000452451	76.01	55.057	76.01	-1.0093	39951000	0.0170474	0.747866	0.115415	Q9BXJ9
0.988864	1.01181	1.02511	1.00293	1.02716	1.03735	1.01822	1.00483	1.06249	0.996508	0.970476	0.982161	1.0297	1.01147	1.00843	0.993463	1.07717	1.01816	1.06071	1.06812	1.03354	1.02372	1.00487	1.046	S	924	2	___1	ERK1,2 kinase substrate motif;Growth associated histone HI kinase substrate motif;GSK-3, ERK1, ERK2, CDK5 substrate motif;PKA kinase substrate motif;PKC kinase substrate motif;WW domain binding motif	+	CST;HTP	biosynthetic process;cellular biosynthetic process;cellular macromolecule biosynthetic process;cellular macromolecule metabolic process;cellular metabolic process;cellular nitrogen compound metabolic process;cellular process;macromolecule biosynthetic process;macromolecule metabolic process;metabolic process;nitrogen compound metabolic process;nucleic acid metabolic process;nucleobase-containing …	binding;DNA binding;nucleic acid binding;nucleic acid binding transcription factor activity;sequence-specific DNA binding transcription factor activity	cell part;cytoplasm;histone methyltransferase complex;intracellular organelle part;intracellular part;macromolecular complex;methyltransferase complex;MLL1 complex;nuclear part;nucleoplasm;nucleoplasm part;organelle part;protein complex;transcription factor complex		Alternativesplicing;Coiledcoil;Completeproteome;DNA-binding;Nucleus;Phosphoprotein;Polymorphism;Referenceproteome;Repressor;Transcription;Transcriptionregulation	E2F-6 complex	PS01264;PS50252;PS50888	BHLH;TBOX_2;TBOX_3	0.999992	0.000395446	108.37	86.844	108.37	-0.16464	86130000	0.0329739	0.65235	0.120968	Q8IWI9
1.02592	1.0197	1.02383	1.04031	1.08311	1.07418	1.02587	1.05657	1.10095	1.06243	0.980882	1.03667	1.04552	1.06403	1.01494	1.05809	1.01846	1.02642	1.09211	1.08647	1.02255	0.974509	1.04457	1.03904	S	352	3	___1	b-Adrenergic Receptor kinase substrate motif;PKA kinase substrate motif;PKC kinase substrate motif	+	CST;HTP	adherens junction organization;anatomical structure development;biological adhesion;biological regulation;biosynthetic process;brain development;cell adhesion;cell junction assembly;cell junction organization;cell surface receptor linked signaling pathway;cell-cell adhesion;cell-cell junction organization;cellular biosynthetic process;cellular component assembly;cellular component assembly at cel…	binding;cadherin binding;cell adhesion molecule binding;protein binding;receptor binding	adherens junction;anchoring junction;cell junction;cell part;cell projection;cell projection part;cell-cell adherens junction;cell-cell junction;cytoplasm;cytoplasmic part;cytosol;dendritic spine;extracellular membrane-bounded organelle;extracellular organelle;extracellular region part;extracellular vesicular exosome;growth cone;intracellular membrane-bounded organelle;intracellular organelle;int…	Adherens junction;Leukocyte transendothelial migration	3D-structure;Acetylation;Alternativeinitiation;Alternativesplicing;Celladhesion;Cellmembrane;Coiledcoil;Completeproteome;Cytoplasm;Membrane;Nucleus;Phosphoprotein;Polymorphism;Referenceproteome;Repeat;Transcription;Transcriptionregulation;Wntsignalingpathway		PS50176	ARM_REPEAT	1	1.00905e-07	145.6	117.92	145.6	0.21225	1128800000	0.89903	0.961634	0.122289	O60716
0.936532	1.00998	1.0206	1.01087	0.97412	1.01644	1.00677	0.966172	1.03308	0.996036	0.999726	1.04447	1.02616	0.989111	1.009	1.06711	1.05371	1.0307	0.979465	0.927392	1.0982	1.13877	1.0067	1.01452	S	873	4	___1	Casein kinase II substrate motif;Cdc2 kinase substrate motif;CDK kinase substrate motif;CDK1,2,4,6 kinase substrate motif;ERK1,2 kinase substrate motif;GSK-3, ERK1, ERK2, CDK5 substrate motif;PKA kinase substrate motif;PKC kinase substrate motif;WW domain binding motif	+	HTP;LTP	actin filament-based process;actin-mediated cell contraction;activation of protein kinase activity;activation of protein kinase C activity by G-protein coupled receptor protein signaling pathway;anatomical structure morphogenesis;apical constriction;asymmetric cell division;axon ensheathment;axonogenesis;biological regulation;cell cycle;cell division;cell junction assembly;cell junction organizat…	binding;lipid binding;phosphatidylinositol binding;phosphatidylinositol-3,4,5-trisphosphate binding;phosphatidylinositol-3-phosphate binding;phosphatidylinositol-4,5-bisphosphate binding;phospholipid binding	adherens junction;anchoring junction;apical part of cell;axon part;axonal growth cone;cell body;cell cortex;cell junction;cell part;cell projection part;cell-cell adherens junction;cell-cell junction;cytoplasmic part;cytoskeletal part;cytosol;endomembrane system;growth cone;internode region of axon;intracellular non-membrane-bounded organelle;intracellular organelle;intracellular organelle part;i…	Adherens junction;Chemokine signaling pathway;Endocytosis;Neuroactive ligand-receptor interaction;Tight junction	3D-structure;Acetylation;Alternativesplicing;Cellcycle;Celldivision;Celljunction;Cellmembrane;Coiledcoil;Completeproteome;Cytoplasm;Cytoskeleton;Differentiation;Lipid-binding;Membrane;Phosphoprotein;Polymorphism;Referenceproteome;Repeat;Tightjunction	KIF3A/B-PAR-3-aPKC-PAR-6 complex;PAR-3-PAR-6B-PRKCI complex;PAR3-PAR6-PALS1 complex;PAR-3-VE-cadherin-beta-catenin complex;PAR-6-PAR-3-VE-cadherin complex, endothelial;PKD2-FPC complex;PLCB1-PARD3-PARD6A complex;PLCB3-PARD3-PARD6A complex;RICH1-PAR3-aPKC polarity complex	PS50106	PDZ	0.990598	1.99842e-19	182.17	133.98	155.08	0.2875	902350000	0.183032	0.196469	0.12423	Q8TEW0
0.993737	1.00472	1.03921	0.989819	1.0001	0.987221	1.01029	1.00778	1.04439	1.00988	1.00202	0.9429	1.00727	0.997152	1.00835	0.96226	1.05958	1.05586	1.02924	1.00692	1.10479	1.19484	1.02352	1.00747	S	140	3	___1	Casein kinase II substrate motif;MDC1 BRCT domain binding motif;PKA kinase substrate motif;Plk1 PBD domain binding motif	+	HTP	biosynthetic process;catabolic process;cellular biosynthetic process;cellular catabolic process;cellular component disassembly;cellular component disassembly at cellular level;cellular component organization;cellular component organization at cellular level;cellular component organization or biogenesis;cellular component organization or biogenesis at cellular level;cellular macromolecular complex…	binding;nucleic acid binding;RNA binding;structural constituent of ribosome;structural molecule activity	cell part;cytoplasm;cytoplasmic part;cytosol;cytosolic large ribosomal subunit;cytosolic part;cytosolic ribosome;intracellular membrane-bounded organelle;intracellular non-membrane-bounded organelle;intracellular organelle;intracellular organelle part;intracellular part;large ribosomal subunit;macromolecular complex;membrane;membrane-bounded organelle;non-membrane-bounded organelle;nuclear part;n…	Ribosome	3D-structure;Acetylation;Alternativesplicing;Completeproteome;Phosphoprotein;Polymorphism;Referenceproteome;Ribonucleoprotein;Ribosomalprotein	60S ribosomal subunit, cytoplasmic;Nop56p-associated pre-rRNA complex;Ribosome, cytoplasmic;TRBP containing complex (DICER, RPL7A, EIF6, MOV10 and subunits of the 60S ribosomal particle)	PS01104	RIBOSOMAL_L13E	0.90628	0.000398578	108.01	61.278	67.648	0.5538	1235900000	0.00446989	0.437674	0.124698	P26373
0.899989	0.994846	1.02227	0.998725	0.924602	0.996736	1.01143	0.904772	1.00589	0.992049	0.997872	1.04315	1.02744	0.981677	1.00779	1.05457	1.04773	1.0401	0.935754	1.00983	1.10889	1.14299	1.02192	1.0233	T	269	3	___1	Casein kinase II substrate motif;G protein-coupled receptor kinase 1 substrate motif;GSK-3, ERK1, ERK2, CDK5 substrate motif;PKA kinase substrate motif;PKC kinase substrate motif;RAF1 kinase substrate motif;WW domain binding motif	+	CST;HTP;LTP	autophagy;biological regulation;catabolic process;cell communication;cell differentiation;cell surface receptor linked signaling pathway;cellular catabolic process;cellular component assembly;cellular component organization;cellular component organization or biogenesis;cellular developmental process;cellular macromolecule catabolic process;cellular macromolecule metabolic process;cellular metabol…	binding;catalytic activity;cation binding;enzyme binding;identical protein binding;ion binding;kinase activity;kinase binding;metal ion binding;phosphotransferase activity, alcohol group as acceptor;protein binding;protein domain specific binding;protein kinase activity;protein kinase binding;protein kinase C binding;protein serine/threonine kinase activity;receptor binding;receptor tyrosine kina…	aggresome;autophagic vacuole;cell part;cytoplasm;cytoplasmic mRNA processing body;cytoplasmic part;cytoplasmic vesicle;cytosol;endoplasmic reticulum;endosome;extracellular membrane-bounded organelle;extracellular organelle;extracellular region part;extracellular vesicular exosome;inclusion body;intracellular membrane-bounded organelle;intracellular non-membrane-bounded organelle;intracellular org…	Osteoclast differentiation	3D-structure;Acetylation;Alternativesplicing;Apoptosis;Autophagy;Completeproteome;Cytoplasm;Cytoplasmicvesicle;Differentiation;Directproteinsequencing;Diseasemutation;Endoplasmicreticulum;Endosome;Immunity;Lysosome;Metal-binding;Nucleus;Phosphoprotein;Polymorphism;Referenceproteome;Zinc;Zinc-finger	MAP2K5-PRKCI-SQSTM1 complex	PS01357;PS50030;PS50135;PS51745	PB1;UBA;ZF_ZZ_1;ZF_ZZ_2	0.998825	3.20917e-33	231.35	201.62	218.41	-0.27349	2580100000	0.0210434	0.379377	0.125518	Q13501
0.89321	0.969603	1.00492	1.0155	0.955017	0.973306	1.0033	0.966239	0.986295	1.00594	0.983582	0.974576	1.02929	0.971899	0.987712	1.00339	1.05924	1.01674	0.919501	0.90815	1.0999	1.07597	1.02543	1.02327	S	137	4	___1	Casein kinase II substrate motif;Pyruvate dehydrogenase kinase substrate motif	+	CST;HTP	biological regulation;biosynthetic process;cellular biosynthetic process;cellular macromolecule biosynthetic process;cellular macromolecule metabolic process;cellular metabolic process;cellular process;cellular protein metabolic process;gene expression;macromolecule biosynthetic process;macromolecule metabolic process;metabolic process;posttranscriptional regulation of gene expression;primary met…	binding;catalytic activity;GTP binding;GTPase activity;guanyl nucleotide binding;guanyl ribonucleotide binding;hydrolase activity;hydrolase activity, acting on acid anhydrides;hydrolase activity, acting on acid anhydrides, in phosphorus-containing anhydrides;nucleic acid binding;nucleoside-triphosphatase activity;nucleotide binding;purine nucleotide binding;purine ribonucleoside triphosphate bind…	cell part;cytoplasm;cytoplasmic part;cytosol;intracellular part	RNA transport	Completeproteome;Cytoplasm;Directproteinsequencing;GTP-binding;Initiationfactor;Nucleotide-binding;Phosphoprotein;Polymorphism;Proteinbiosynthesis;Referenceproteome		PS51722	G_TR_2	0.999982	4.50928e-31	199.97	177.27	192.25	-0.23874	2996000000	0.199346	0.113925	0.133024	O60841
1.00652	0.978807	0.976484	1.04736	1.06413	1.02217	1.0004	1.08681	0.965603	0.97884	0.972261	0.945149	0.975682	0.970554	0.998663	0.970156	1.02386	1.0146	0.933288	0.995675	1.06968	1.14832	1.02985	0.952025	S	17	3	___1	b-Adrenergic Receptor kinase substrate motif;ERK1,2 kinase substrate motif;GSK-3, ERK1, ERK2, CDK5 substrate motif;WW domain binding motif	+	CST;HTP	biosynthetic process;cell differentiation;cellular biosynthetic process;cellular developmental process;cellular macromolecule biosynthetic process;cellular macromolecule metabolic process;cellular metabolic process;cellular nitrogen compound metabolic process;cellular process;developmental process;macromolecule biosynthetic process;macromolecule metabolic process;metabolic process;muscle cell dif…	binding;DNA binding;nucleic acid binding;nucleotide binding	cell part;cytoplasm;intracellular membrane-bounded organelle;intracellular organelle;intracellular organelle part;intracellular part;membrane-bounded organelle;nuclear part;nucleoplasm;nucleus;organelle;organelle part		Alternativesplicing;Completeproteome;DNA-binding;Nucleus;Phosphoprotein;Polymorphism;Referenceproteome;Repeat;Repressor;RNA-binding;Transcription		PS50102	RRM	0.999457	5.10731e-31	162.07	141.63	162.07	-0.022405	239040000	0.00921685	0.00841149	0.133558	Q9P2K5
0.981034	1.03496	1.03684	1.01033	0.986641	1.02553	1.03121	0.971121	1.06168	0.984707	0.998835	1.03567	1.0155	0.997914	1.01807	1.04144	1.02219	1.03927	0.88894	1.07306	1.04573	1.20582	1.04619	1.08987	S	388	4	___1	14-3-3 domain binding motif;Calmodulin-dependent protein kinase II alpha substrate motif;Calmodulin-dependent protein kinase II substrate motif;Calmodulin-dependent protein kinase IV substrate motif;Casein kinase II substrate motif;Chk1 kinase substrate motif;G protein-coupled receptor kinase 1 substrate motif;MAPKAPK2 kinase substrate motif;Phosphorylase kinase substrate motif;PKA kinase substra…	+	CST;HTP			cell part;integral to membrane;intrinsic to membrane;membrane part		Completeproteome;Membrane;Phosphoprotein;Referenceproteome;Transmembrane;Transmembranehelix				0.995555	1.51559e-10	173.71	144.08	113.52	0.12391	1250800000	0.403529	0.345152	0.133783	Q9Y519
0.974311	0.98053	1.0128	1.02079	1.02244	1.00679	1.00358	0.952019	0.997167	1.00532	0.953081	0.91906	1.01352	0.971884	0.988234	0.999849	1.08501	0.994646	1.13957	1.03467	1.05583	0.87233	1.02087	0.85693	S	8	2	___1	Casein kinase II substrate motif	+	HTP	anatomical structure development;biological regulation;cell cycle;cell cycle process;cell differentiation;cellular component disassembly;cellular component disassembly at cellular level;cellular component organization;cellular component organization at cellular level;cellular component organization or biogenesis;cellular component organization or biogenesis at cellular level;cellular developmenta…	actin binding;beta-tubulin binding;binding;cytoskeletal protein binding;protein binding;tubulin binding	cell part;cytoplasmic part;cytoskeletal part;endoplasmic reticulum;envelope;integral to membrane;intracellular membrane-bounded organelle;intracellular organelle;intracellular organelle part;intracellular part;intrinsic to membrane;macromolecular complex;membrane;membrane part;membrane-bounded organelle;microtubule;nuclear envelope;nuclear inner membrane;nuclear membrane;nuclear outer membrane;nu…	Arrhythmogenic right ventricular cardiomyopathy (ARVC);Dilated cardiomyopathy;Hypertrophic cardiomyopathy (HCM)	3D-structure;Acetylation;Actin-binding;Cardiomyopathy;Completeproteome;Directproteinsequencing;Diseasemutation;Emery-Dreifussmusculardystrophy;Membrane;Microtubule;Nucleus;Phosphoprotein;Referenceproteome;Transmembrane;Transmembranehelix	Emerin architectural complex;Emerin complex 1;Emerin complex 24;Emerin complex 25;Emerin complex 32;Emerin complex 52;Emerin regulatory complex;Emerin-actin-NMI complex;Emerin-actin-NMI-(alphaII)spectrin complex	PS50954	LEM	0.999855	7.99186e-40	214.53	196.17	199.58	-0.14586	1208400000	0.190624	0.387894	0.134106	P50402
0.970882	1.01021	1.03194	1.0236	1.03468	1.01967	1.00197	1.00989	1.03416	0.973017	0.966024	0.974421	1.03865	0.970043	1.00366	1.01717	1.05421	1.0006	1.12265	1.02379	1.04243	0.932187	1.0068	0.985955	T	445	3	___1	Casein kinase II substrate motif;ERK1,2 kinase substrate motif;GSK3, Erk1, Erk2 and CDK5 kinase motif;GSK-3, ERK1, ERK2, CDK5 substrate motif;RAF1 kinase substrate motif;WW domain binding motif	+	CST;HTP;LTP	biological regulation;biosynthetic process;cellular biosynthetic process;cellular component organization;cellular component organization at cellular level;cellular component organization or biogenesis;cellular component organization or biogenesis at cellular level;cellular macromolecule biosynthetic process;cellular macromolecule metabolic process;cellular metabolic process;cellular nitrogen comp…	binding;chromatin binding;protein binding;protein binding transcription factor activity;repressing transcription factor binding;RNA polymerase II repressing transcription factor binding;RNA polymerase II transcription factor binding;transcription cofactor activity;transcription corepressor activity;transcription factor binding;transcription factor binding transcription factor activity	cell part;chromosomal part;cytoplasm;H4/H2A histone acetyltransferase complex;histone acetyltransferase complex;intracellular membrane-bounded organelle;intracellular organelle;intracellular organelle part;intracellular part;macromolecular complex;membrane-bounded organelle;NuA4 histone acetyltransferase complex;nuclear part;nucleoplasm;nucleoplasm part;nucleus;organelle;organelle part;protein co…		3D-structure;Activator;Chromatinregulator;Coiledcoil;Completeproteome;Cytoplasm;Directproteinsequencing;Growthregulation;Nucleus;Phosphoprotein;Referenceproteome;Repressor;Transcription;Transcriptionregulation	DAXX-DNMT1-DMAP1 complex;DMAP1-associated complex;NuA4/Tip60 HAT complex;NuA4/Tip60-HAT complex A;NuA4/Tip60-HAT complex B;RGS6-DNMT1-DMAP1 complex			0.999718	1.50485e-13	158.48	143.65	158.48	0.24428	77379000	0.33603	0.589767	0.134383	Q9NPF5
1.0118	0.987219	1.01356	1.03005	1.02242	1.04041	1.00575	0.991949	1.03402	0.974877	0.945971	1.05371	1.00531	0.988783	0.995446	1.07722	1.10189	1.01177	1.04369	1.09462	1.04962	0.947116	0.996965	1.10022	S	127	3	___1	b-Adrenergic Receptor kinase substrate motif;Casein kinase I substrate motif;Casein kinase II substrate motif;Plk1 kinase substrate motif	+	CST;HTP	anatomical structure formation involved in morphogenesis;angiogenesis;biological regulation;body fluid secretion;cellular component assembly;cellular component assembly at cellular level;cellular component organization;cellular component organization at cellular level;cellular component organization or biogenesis;cellular component organization or biogenesis at cellular level;cellular membrane or…	binding;calcium ion binding;calcium-dependent phospholipid binding;calcium-dependent protein binding;cation binding;enzyme inhibitor activity;enzyme regulator activity;ion binding;lipase inhibitor activity;lipid binding;metal ion binding;phosphatidylinositol binding;phosphatidylinositol-4,5-bisphosphate binding;phospholipase A2 inhibitor activity;phospholipase inhibitor activity;phospholipid bind…	basement membrane;basolateral plasma membrane;cell cortex;cell part;cell projection;cell surface;cytoplasmic membrane-bounded vesicle;cytoplasmic part;cytoplasmic vesicle;early endosome;endosomal part;endosome;endosome membrane;extracellular matrix part;extracellular membrane-bounded organelle;extracellular organelle;extracellular region part;extracellular space;extracellular vesicular exosome;ex…		3D-structure;Acetylation;Alternativesplicing;Annexin;Basementmembrane;Calcium;Calcium/phospholipid-binding;Completeproteome;Directproteinsequencing;Extracellularmatrix;Phosphoprotein;Polymorphism;Referenceproteome;Repeat;Secreted;Ublconjugation		PS00223	ANNEXIN	0.999973	7.67462e-14	158.45	150.54	158.45	-0.18457	88750000	0.409223	0.390907	0.135301	P07355;A6NMY6
0.919398	1.00913	1.01606	0.991577	0.939424	1.01352	1.01729	0.935137	0.966552	0.966647	1.01877	1.05088	1.03039	0.945715	1.00568	1.06408	0.951637	1.02003	0.910525	0.970945	1.00528	1.13515	1.03194	1.13983	S	884	2	___1	ERK1,2 kinase substrate motif;G protein-coupled receptor kinase 1 substrate motif;Growth associated histone HI kinase substrate motif;GSK-3, ERK1, ERK2, CDK5 substrate motif;MDC1 BRCT domain binding motif;PKA kinase substrate motif;PKC kinase substrate motif;Plk1 PBD domain binding motif;WW domain binding motif	+	HTP	apoptosis;biological regulation;biosynthetic process;cell death;cellular biosynthetic process;cellular macromolecule biosynthetic process;cellular macromolecule metabolic process;cellular metabolic process;cellular nitrogen compound metabolic process;cellular process;cellular response to stimulus;cellular response to stress;death;macromolecule biosynthetic process;macromolecule metabolic process;…	binding;DNA binding;nucleic acid binding	cell part;cytoplasm;intracellular membrane-bounded organelle;intracellular non-membrane-bounded organelle;intracellular organelle;intracellular organelle part;intracellular part;membrane-bounded organelle;non-membrane-bounded organelle;nuclear part;nucleolus;nucleoplasm;nucleus;organelle;organelle part		Acetylation;Alternativesplicing;Citrullination;Completeproteome;Cytoplasm;Directproteinsequencing;DNA-binding;Nucleus;Phosphoprotein;Polymorphism;Referenceproteome;Repressor;Transcription;Transcriptionregulation				0.974201	9.83447e-11	190.35	159.49	190.35	-0.32785	3502800000	0.520039	0.177835	0.135774	Q9NYF8
0.981721	1.11784	1.03679	0.998132	1.05038	1.11776	1.01842	1.01414	0.856783	0.974252	1.02395	0.947435	0.935681	0.949914	1.00754	0.959977	1.03475	1.02104	1.16232	1.04615	1.01715	0.81283	1.02281	1.14216	S	105	2	___1	G protein-coupled receptor kinase 1 substrate motif;MDC1 BRCT domain binding motif;Plk1 PBD domain binding motif	+	CST;HTP					Acetylation;Alternativesplicing;Coiledcoil;Completeproteome;Phosphoprotein;Polymorphism;Referenceproteome				0.919023	2.15885e-12	217.62	161.97	203.69	-0.32261	985760000	0.0592226	0.380857	0.137207	Q7L4I2
1.0173	0.992473	1.00821	0.993356	1.04371	1.02122	1.01131	0.994272	0.959294	0.971339	0.990583	1.06118	0.999553	0.976175	1.00242	1.07139	1.04318	1.01256	1.07575	1.0552	1.03374	0.921405	1.02107	1.015	S	1579	2	___1	b-Adrenergic Receptor kinase substrate motif;PKA kinase substrate motif	+	HTP	biological regulation;cell cycle;cellular process;cellular response to stimulus;cellular response to stress;developmental process;negative regulation of biological process;negative regulation of cell differentiation;negative regulation of cellular process;negative regulation of developmental process;regulation of biological process;regulation of cell differentiation;regulation of cellular process…		cell part;chromosomal part;chromosome, telomeric region;cytoplasm;cytoskeletal part;female pronucleus;intracellular membrane-bounded organelle;intracellular non-membrane-bounded organelle;intracellular organelle;intracellular organelle part;intracellular part;male pronucleus;membrane;membrane-bounded organelle;non-membrane-bounded organelle;nucleus;organelle;organelle part;plasma membrane;pronucl…		Alternativesplicing;Cellcycle;Chromosome;Completeproteome;Cytoplasm;Cytoskeleton;DNAdamage;Nucleus;Phosphoprotein;Polymorphism;Referenceproteome;Telomere				1	2.31727e-86	338.78	299.2	285.81	0.41166	1483700000	0.595043	0.685244	0.137658	Q5UIP0
0.944974	1.00081	1.01191	1.0529	1.0176	1.01443	1.00464	1.03329	1.14243	1.02699	0.977537	0.983136	1.06009	1.01012	1.00531	1.03717	1.08023	0.99736	1.04881	1.15353	1.02347	0.953392	0.971499	1.06718	S	1405	3	___1	ERK1,2 kinase substrate motif;GSK-3, ERK1, ERK2, CDK5 substrate motif;WW domain binding motif	+	HTP	actin cytoskeleton organization;actin filament-based process;biological regulation;cell chemotaxis;cell migration;cell motility;cellular component movement;cellular component organization;cellular component organization at cellular level;cellular component organization or biogenesis;cellular component organization or biogenesis at cellular level;cellular process;cellular response to chemical stim…	binding;enzyme regulator activity;GTP binding;GTPase regulator activity;guanyl nucleotide binding;guanyl ribonucleotide binding;guanyl-nucleotide exchange factor activity;nucleoside-triphosphatase regulator activity;nucleotide binding;purine nucleotide binding;purine ribonucleoside triphosphate binding;purine ribonucleotide binding;Ras guanyl-nucleotide exchange factor activity;Rho guanyl-nucleot…			Alternativesplicing;Completeproteome;Guanine-nucleotidereleasingfactor;Phosphoprotein;Proto-oncogene;Referenceproteome;SH3domain		PS00741;PS50002;PS50003;PS50010	DH_1;DH_2;PH_DOMAIN;SH3	0.966206	1.56603e-16	162.37	136.82	126.22	1.2443	63691000	0.619725	0.27658	0.142779	Q12774
0.935857	0.990772	1.0148	1.06973	0.868499	0.997905	1.00238	1.00043	1.15509	1.01736	0.955042	1.02851	1.23907	1.05716	1.00066	1.07389	1.11752	1.02668	1.08831	1.05394	1.02157	0.910782	0.984361	0.931041	S	832	3	___1	b-Adrenergic Receptor kinase substrate motif;Casein kinase II substrate motif	+	CST;HTP	biological regulation;biosynthetic process;cell activation;cell cycle phase;cell cycle process;cell division;cell proliferation;cellular biosynthetic process;cellular component assembly;cellular component assembly at cellular level;cellular component organization;cellular component organization at cellular level;cellular component organization or biogenesis;cellular component organization or biog…	adenyl nucleotide binding;adenyl ribonucleotide binding;ATP binding;binding;catalytic activity;DNA binding;helicase activity;hydrolase activity;hydrolase activity, acting on acid anhydrides;hydrolase activity, acting on acid anhydrides, in phosphorus-containing anhydrides;nucleic acid binding;nucleoside-triphosphatase activity;nucleotide binding;purine nucleotide binding;purine ribonucleoside tri…	cell part;centromeric heterochromatin;chromatin;chromosomal part;chromosome, centromeric region;heterochromatin;intracellular membrane-bounded organelle;intracellular organelle;intracellular organelle part;intracellular part;membrane-bounded organelle;nucleus;organelle;organelle part		Alternativesplicing;ATP-binding;Cellcycle;Celldivision;Coiledcoil;Completeproteome;Developmentalprotein;Helicase;Hydrolase;Mitosis;Nucleotide-binding;Nucleus;Polymorphism;Referenceproteome;Transcription;Transcriptionregulation		PS51192;PS51194	HELICASE_ATP_BIND_1;HELICASE_CTER	0.991751	1.32216e-07	127.17	118.64	91.969	0.13457	102100000	0.104398	0.438427	0.14317	Q9NRZ9
0.919522	1.00667	1.03166	0.993749	0.912235	1.00465	1.03627	0.968901	1.02578	1.02056	1.04588	0.995387	1.1052	0.944891	1.00264	1.00009	1.00623	1.04566	0.837031	0.921376	1.082	1.04056	1.04156	1.04791	S	196	4	___1	14-3-3 domain binding motif;b-Adrenergic Receptor kinase substrate motif;Calmodulin-dependent protein kinase II substrate motif;Casein kinase II substrate motif;G protein-coupled receptor kinase 1 substrate motif;PKA kinase substrate motif;PKC epsilon kinase substrate motif;PKC kinase substrate motif	+	CST;HTP	cellular component organization;cellular component organization at cellular level;cellular component organization or biogenesis;cellular component organization or biogenesis at cellular level;cellular process;chromatin assembly or disassembly;chromatin organization;chromosome organization;organelle organization		cell part;intracellular membrane-bounded organelle;intracellular non-membrane-bounded organelle;intracellular organelle;intracellular organelle part;intracellular part;membrane-bounded organelle;non-membrane-bounded organelle;nuclear part;nucleolus;nucleoplasm;nucleus;organelle;organelle part		Alternativesplicing;Completeproteome;Nucleus;Phosphoprotein;Polymorphism;Referenceproteome				1	8.03211e-29	209.85	183.64	84.689	-0.42397	174650000	0.521644	0.312799	0.144908	Q9BW71
0.964224	0.991444	1.01133	1.02588	1.00381	1.01182	1.00498	1.01384	1.00743	0.990847	0.995355	1.00616	1.02661	0.977669	1.00364	1.02629	1.05289	1.00602	0.975535	0.977437	1.13567	1.05085	1.01867	1.05807	S	221	2	___1	14-3-3 domain binding motif;b-Adrenergic Receptor kinase substrate motif;Calmodulin-dependent protein kinase II substrate motif;Casein kinase II substrate motif;ERK1,2 kinase substrate motif;GSK-3, ERK1, ERK2, CDK5 substrate motif;PKA kinase substrate motif;PKC kinase substrate motif;WW domain binding motif	+	CST;HTP	biological regulation;cell cycle;cell cycle phase;cell cycle process;cell division;cellular component organization;cellular component organization at cellular level;cellular component organization or biogenesis;cellular component organization or biogenesis at cellular level;cellular localization;cellular macromolecule localization;cellular process;cellular protein localization;localization;macrom…		cell part;chromatin;chromosomal part;chromosome;chromosome, centromeric region;cohesin complex;cytoplasm;cytoplasmic part;cytoskeleton;cytosol;intracellular membrane-bounded organelle;intracellular non-membrane-bounded organelle;intracellular organelle;intracellular organelle part;intracellular part;macromolecular complex;membrane-bounded organelle;microtubule cytoskeleton;non-membrane-bounded or…		3D-structure;Acetylation;Alternativesplicing;Cellcycle;Celldivision;Chromosome;Coiledcoil;Completeproteome;Cytoplasm;Host-virusinteraction;Mitosis;Nucleus;Phosphoprotein;Polymorphism;Referenceproteome		PS51271	WAPL	0.999095	2.96773e-20	164.55	141.66	89.923	0.51928	3091400000	0.164958	0.0663853	0.151479	Q7Z5K2
1.00889	0.998027	1.01258	1.0573	1.10017	1.03955	1.01197	1.03617	0.959765	0.974005	0.993217	0.978653	0.9921	0.985696	1.00003	1.04991	1.11366	1.0075	1.14409	1.04816	1.09378	0.969819	1.02888	1.01838	S	510	3	___1	G protein-coupled receptor kinase 1 substrate motif	+	CST;HTP		adenyl nucleotide binding;adenyl ribonucleotide binding;ATP binding;binding;catalytic activity;kinase activity;non-membrane spanning protein tyrosine kinase activity;nucleotide binding;phosphotransferase activity, alcohol group as acceptor;protein kinase activity;protein tyrosine kinase activity;purine nucleotide binding;purine ribonucleoside triphosphate binding;purine ribonucleotide binding;rib…			ATP-binding;Completeproteome;Kinase;Nucleotide-binding;Phosphoprotein;Polymorphism;Referenceproteome;Transferase;Tyrosine-proteinkinase		PS00109;PS50011	PROTEIN_KINASE_DOM;PROTEIN_KINASE_TYR	0.999371	3.67259e-28	197.32	182.72	197.32	-0.27074	130910000	0.019009	0.847113	0.151642	Q86YV5
0.990108	1.00535	1.02767	1.00851	1.04096	1.03088	1.01901	1.0214	1.02611	0.985912	0.975571	0.981868	1.0184	0.975589	0.992079	0.996435	1.045	1.01592	1.04829	1.00853	1.03653	0.974922	1.01094	0.989077	S	416	3	___1	Casein kinase II substrate motif;ERK1,2 kinase substrate motif;GSK-3, ERK1, ERK2, CDK5 substrate motif;WW domain binding motif	+	CST;HTP	attachment of spindle microtubules to chromosome;attachment of spindle microtubules to kinetochore;attachment of spindle microtubules to kinetochore involved in mitotic sister chromatid segregation;biological regulation;cell cycle process;cellular component organization;cellular component organization at cellular level;cellular component organization or biogenesis;cellular component organization …	binding;cation binding;ion binding;metal ion binding;nucleic acid binding	cell part;chromosomal part;chromosome;condensed chromosome;condensed chromosome kinetochore;cytoplasm;cytoskeletal part;intracellular membrane-bounded organelle;intracellular non-membrane-bounded organelle;intracellular organelle;intracellular organelle part;intracellular part;kinetochore;macromolecular complex;membrane-bounded organelle;non-membrane-bounded organelle;nuclear part;nucleoplasm;nuc…		Acetylation;Centromere;Chromosome;Completeproteome;Cytoplasm;Cytoskeleton;Kinetochore;Metal-binding;Nucleus;Phosphoprotein;Polymorphism;Referenceproteome;Zinc;Zinc-finger		PS00028;PS50157	ZINC_FINGER_C2H2_1;ZINC_FINGER_C2H2_2	1	3.75573e-05	139.15	97.152	99.539	0.057761	227860000	0.0337236	0.92904	0.152077	Q96JM3
1.16266	0.91836	0.992134	1.0235	1.2275	1.08327	0.987352	1.14045	0.984139	0.982021	0.939935	0.971144	0.977968	1.00223	0.976833	0.969037	1.0884	0.990393	1.15817	1.25073	1.06581	1.01839	1.0474	0.957046	S	886	3	___1	14-3-3 domain binding motif;Aurora-A kinase substrate motif;Calmodulin-dependent protein kinase II substrate motif;MAPKAPK2 kinase substrate motif;PAK2 kinase substrate motif;Phosphorylase kinase substrate motif;PKA kinase substrate motif;PKC epsilon kinase substrate motif;PKC kinase substrate motif	+	CST;HTP;LTP	actin cytoskeleton organization;actin filament organization;actin filament-based process;anatomical structure morphogenesis;biological regulation;cell cycle phase;cell cycle process;cell division;cell morphogenesis;cell surface receptor linked signaling pathway;cellular component morphogenesis;cellular component organization;cellular component organization at cellular level;cellular component org…	binding;cation binding;cytoskeletal protein binding;enzyme binding;enzyme regulator activity;GTPase binding;GTPase regulator activity;guanyl-nucleotide exchange factor activity;ion binding;metal ion binding;microtubule binding;nucleoside-triphosphatase regulator activity;protein binding;Rac GTPase binding;Rac guanyl-nucleotide exchange factor activity;Ras GTPase binding;Ras guanyl-nucleotide exch…	adherens junction;anchoring junction;cell body;cell junction;cell part;cell projection membrane;cell projection part;cell-cell junction;cell-substrate adherens junction;cell-substrate junction;cytoplasm;cytoplasmic membrane-bounded vesicle;cytoplasmic part;cytoplasmic vesicle;cytoskeletal part;cytoskeleton;cytosol;dendritic shaft;focal adhesion;Golgi apparatus;intracellular membrane-bounded organ…	Pathogenic Escherichia coli infection	Acetylation;Alternativesplicing;Cellcycle;Celldivision;Celljunction;Cellmembrane;Cellprojection;Coiledcoil;Completeproteome;Cytoplasm;Cytoplasmicvesicle;Cytoskeleton;Golgiapparatus;Guanine-nucleotidereleasingfactor;Immunity;Innateimmunity;Membrane;Metal-binding;Microtubule;Mitosis;Phosphoprotein;Referenceproteome;Tightjunction;Zinc;Zinc-finger		PS00479;PS50003;PS50010;PS50081	DH_2;PH_DOMAIN;ZF_DAG_PE_1;ZF_DAG_PE_2	1	6.71102e-20	175.28	163.66	175.28	0.44659	78478000	0.0242815	0.838966	0.155357	Q92974
0.975638	0.995421	1.00965	1.02813	1.00154	1.00308	1.00071	0.996775	1.05513	1.00505	0.977884	1.00067	1.04217	1.00705	1.00406	1.02421	1.04412	1.02347	0.907055	1.0028	1.05884	1.16495	1.00239	1.01073	S	733	2	___2	MDC1 BRCT domain binding motif;Plk1 PBD domain binding motif	+	CST;HTP	activation of JUN kinase activity;activation of MAPK activity;biological regulation;cell differentiation;cellular component assembly;cellular component organization;cellular component organization or biogenesis;cellular developmental process;cellular macromolecule metabolic process;cellular metabolic process;cellular process;cellular protein metabolic process;developmental process;endosome transp…	binding;binding, bridging;cytoskeletal protein binding;enzyme binding;JUN kinase binding;kinase binding;kinesin binding;MAP-kinase scaffold activity;protein binding;protein complex scaffold;protein kinase binding;receptor signaling complex scaffold activity;signaling adaptor activity;structural molecule activity	acrosomal vesicle;cell part;cytoplasm;cytoplasmic membrane-bounded vesicle;cytoplasmic part;cytoplasmic vesicle;cytosol;extracellular membrane-bounded organelle;extracellular organelle;extracellular region part;extracellular vesicular exosome;integral to membrane;intracellular membrane-bounded organelle;intracellular organelle;intracellular part;intrinsic to membrane;membrane part;membrane-bounde…		3D-structure;Acetylation;Alternativesplicing;Coiledcoil;Completeproteome;Cytoplasm;Cytoplasmicvesicle;Phosphoprotein;Polymorphism;Referenceproteome	CHUK-NFKB2-REL-IKBKG-SPAG9-NFKB1-NFKBIE-COPB2-TNIP1-NFKBIA-RELA-TNIP2 complex			0.996729	3.15619e-34	257.06	221.3	141.1	0.29371	6115700000	0.462887	0.162428	0.160055	O60271
0.991914	1.02274	0.969864	1.06172	1.04247	1.03275	1.00376	0.964611	1.02177	1.00048	0.974229	0.950273	1.02075	0.994438	0.999077	1.06035	1.10838	1.01559	1.16921	0.993233	1.05553	0.959311	0.998832	0.956	S	573	3	___1	ERK1,2 kinase substrate motif;GSK-3, ERK1, ERK2, CDK5 substrate motif;WW domain binding motif	+	CST;HTP;LTP	activation of immune response;activation of innate immune response;alpha-beta T cell activation;alpha-beta T cell activation involved in immune response;alpha-beta T cell differentiation;alpha-beta T cell differentiation involved in immune response;antigen processing and presentation;biological regulation;biosynthetic process;CD4-positive, alpha-beta T cell activation;CD4-positive, alpha-beta T c…	binding;chromatin binding;core promoter binding;DNA binding;nucleic acid binding;nucleic acid binding transcription factor activity;protein binding transcription factor activity;regulatory region DNA binding;regulatory region nucleic acid binding;RNA polymerase II regulatory region DNA binding;RNA polymerase II regulatory region sequence-specific DNA binding;sequence-specific DNA binding;sequence…	cell part;cytoplasm;cytoplasmic part;cytoskeletal part;cytosol;I-kappaB/NF-kappaB complex;intracellular membrane-bounded organelle;intracellular organelle;intracellular organelle part;intracellular part;macromolecular complex;membrane-bounded organelle;microtubule organizing center;nuclear part;nucleoplasm;nucleus;organelle;organelle part;protein complex	MAPK signaling pathway;Osteoclast differentiation	Activator;Biologicalrhythms;Completeproteome;Cytoplasm;Cytoskeleton;DNA-binding;Nucleus;Phosphoprotein;Polymorphism;Referenceproteome;Repressor;Transcription;Transcriptionregulation	hs4 enhancer complex (slow migrating complex);NFKB1-NFKB2-RELA-RELB complex;NFKB1-NFKB2-REL-RELA-RELB complex;TNF-alpha/NF-kappa B signaling complex (CHUK, KPNA3, NFKB2, NFKBIB, REL, IKBKG, NFKB1, NFKBIE, RELB, NFKBIA, RELA, TNIP2);TNF-alpha/Nf-kappa B signaling complex (RPL6, RPL30, RPS13, CHUK, DDX3X, NFKB2, NFKBIB, REL, IKBKG, NFKB1, MAP3K8, RELB, GLG1, NFKBIA, RELA, TNIP2, GTF2I)	PS01204;PS50254	REL_1;REL_2	0.998942	0.000264749	76.713	65.769	76.713	-0.041202	31080000	0.265009	0.578977	0.161562	Q01201
1.02121	1.03762	1.04592	1.01966	1.03709	1.04245	1.03198	1.02152	0.997981	0.997262	1.0065	0.97543	0.982306	0.997677	1.02062	1.00088	1.08267	1.03233	1.0174	0.953528	1.14967	1.09137	1.01912	0.983703	S	414	3	___1	14-3-3 domain binding motif;Calmodulin-dependent protein kinase II substrate motif;Calmodulin-dependent protein kinase IV substrate motif;Casein kinase II substrate motif;Chk1 kinase substrate motif;PKA kinase substrate motif;PKC kinase substrate motif	+	CST;HTP	cellular component movement;cellular process;microtubule-based movement;microtubule-based process		cell part;cytoplasm;cytoskeletal part;dynactin complex;intracellular organelle part;intracellular part;macromolecular complex;microtubule associated complex;organelle part;protein complex		Completeproteome;Cytoplasm;Cytoskeleton;Referenceproteome				0.996754	0.000819457	118.71	81.691	65.224	-0.70307	2267400000	0.0225206	0.165389	0.162773	Q9NZ32
0.940645	1.00336	1.01814	1.00369	0.970197	1.00217	1.00892	0.961374	1.00437	1.00504	0.99727	1.00934	0.987776	1.00076	1.00007	1.02563	1.02535	1.02442	0.979691	1.0404	1.0936	1.11112	1.00098	1.04088	S	366	4	___1	BARD1 BRCT domain binding motif;Casein kinase II substrate motif;PKA kinase substrate motif;PKC kinase substrate motif	+	CST;HTP;LTP	cellular macromolecule metabolic process;cellular metabolic process;cellular nitrogen compound metabolic process;cellular process;histone mRNA metabolic process;macromolecule metabolic process;macromolecule modification;metabolic process;mRNA metabolic process;ncRNA metabolic process;ncRNA processing;nitrogen compound metabolic process;nucleic acid metabolic process;nucleobase-containing compound…	binding;mRNA binding;nucleic acid binding;nucleotide binding;RNA binding;tRNA binding	cell part;intracellular membrane-bounded organelle;intracellular organelle;intracellular part;macromolecular complex;membrane-bounded organelle;nucleus;organelle;ribonucleoprotein complex	Systemic lupus erythematosus	3D-structure;Acetylation;Completeproteome;Nucleus;Phosphoprotein;Polymorphism;Referenceproteome;RNA-binding;Systemiclupuserythematosus	Emerin complex 25;H2AX complex, isolated from cells without IR exposure	PS50102;PS50961	HTH_LA;RRM	1	1.33652e-91	330.44	294.44	260.44	0.032963	20618000000	0.0133417	0.412039	0.162913	P05455
0.926282	1.04119	1.08653	1.03374	0.899195	1.00351	1.03972	0.948408	0.891654	1.0363	1.06136	1.03414	0.9659	0.95291	1.02388	1.03741	1.01218	1.09178	0.873956	0.717186	1.0032	1.10444	1.05149	1.00405	S	138	3	___1	14-3-3 domain binding motif;Akt kinase substrate motif;Calmodulin-dependent protein kinase II substrate motif;Casein kinase II substrate motif;CLK1 kinase substrate motif;MAPKAPK1 kinase substrate motif;p70 Ribosomal S6 kinase substrate motif;Phosphorylase kinase substrate motif;PKA kinase substrate motif;PKC epsilon kinase substrate motif;PKC kinase substrate motif;ZIP kinase substrate motif	+	HTP;LTP	biosynthetic process;cellular biosynthetic process;cellular macromolecule biosynthetic process;cellular macromolecule metabolic process;cellular metabolic process;cellular nitrogen compound metabolic process;cellular process;establishment of localization;establishment of localization in cell;establishment of RNA localization;gene expression;intracellular transport;macromolecule biosynthetic proce…	binding;nucleic acid binding;nucleotide binding;RNA binding	cell part;cytoplasm;intracellular organelle part;intracellular part;nuclear part;nucleoplasm;organelle part	Spliceosome	3D-structure;Acetylation;Alternativesplicing;Completeproteome;Cytoplasm;Directproteinsequencing;mRNAprocessing;mRNAsplicing;mRNAtransport;Nucleus;Phosphoprotein;Referenceproteome;Repeat;RNA-binding;Transport	Spliceosome	PS50102	RRM	0.995974	0.00849151	75.652	10.495	59.013	-1.6192	4927700000	0.88611	0.618013	0.163852	P84103
0.957049	0.988775	1.00804	1.03601	1.00032	1.00332	1.00776	0.997017	1.02673	1.00056	0.977169	1.02786	1.0223	0.979415	0.991713	1.03939	1.05217	1.01456	0.939131	0.980996	1.10471	1.05779	1.01466	1.03115	S	563	3	___1	ERK1,2 kinase substrate motif;Growth associated histone HI kinase substrate motif;GSK-3, ERK1, ERK2, CDK5 substrate motif;PKA kinase substrate motif;PKC kinase substrate motif;WW domain binding motif	+	CST;HTP	biological regulation;cell projection organization;cellular component organization;cellular component organization at cellular level;cellular component organization or biogenesis;cellular component organization or biogenesis at cellular level;cellular process;cytoskeleton organization;neuron projection development;organelle organization;regulation of anatomical structure morphogenesis;regulation …	binding;calmodulin binding;cytoskeletal protein binding;microtubule binding;protein binding;spectrin binding;tubulin binding	cell part;cytoplasm;cytoskeletal part;intracellular organelle part;intracellular part;macromolecular complex;microtubule;organelle part;protein complex		Alternativesplicing;Completeproteome;Cytoplasm;Cytoskeleton;Microtubule;Phosphoprotein;Polymorphism;Referenceproteome		PS51508	CKK	1	1.41062e-13	146.45	131.36	139.12	-0.26738	552180000	0.395146	0.182295	0.164583	Q5T5Y3
0.943201	1.01135	1.01849	1.00689	0.977024	1.02071	1.01729	1.01875	1.04532	0.994049	0.963987	0.982466	1.01129	1.0012	1.00337	1.00212	1.06569	0.982099	1.12226	1.07355	1.05009	0.957527	1.00617	0.980305	S	1227	3	___1	14-3-3 domain binding motif;Calmodulin-dependent protein kinase II substrate motif;Casein kinase II substrate motif;ERK1,2 kinase substrate motif;G protein-coupled receptor kinase 1 substrate motif;Growth associated histone HI kinase substrate motif;GSK-3, ERK1, ERK2, CDK5 substrate motif;PKA kinase substrate motif;PKC kinase substrate motif;WW domain binding motif			anatomical structure development;autophagy;biological regulation;catabolic process;cell differentiation;cellular catabolic process;cellular developmental process;cellular metabolic process;cellular process;developmental process;metabolic process;negative regulation of apoptosis;negative regulation of biological process;negative regulation of cell death;negative regulation of cell proliferation;ne…	binding;enzyme binding;protein binding;ubiquitin protein ligase binding	autophagic vacuole;axoneme;cell part;cell projection part;cytoplasm;cytoplasmic membrane-bounded vesicle;cytoplasmic part;cytoplasmic vesicle;cytosol;endocytic vesicle;intracellular membrane-bounded organelle;intracellular organelle;intracellular organelle part;intracellular part;membrane;membrane-bounded organelle;membrane-bounded vesicle;mitochondrial membrane;mitochondrial outer membrane;mitoc…		Alternativesplicing;Autophagy;Completeproteome;Cytoplasmicvesicle;Developmentalprotein;Differentiation;Neurogenesis;Phosphoprotein;Referenceproteome;Repeat;WDrepeat		PS00678;PS50082;PS50294	WD_REPEATS_1;WD_REPEATS_2;WD_REPEATS_REGION	1	1.3731e-13	153.65	125.56	74.325	-0.17421	139070000	0.132583	0.465698	0.165269	Q9C0C7
1.00767	1.01182	1.0299	1.00678	1.04354	1.0334	1.02777	1.02017	1.07126	0.97504	1.00581	0.986272	1.05759	0.978256	1.01669	0.967354	1.02073	1.02069	0.913883	1.05686	1.06749	1.20794	1.01786	1.01998	S	561	4	___1	14-3-3 domain binding motif;b-Adrenergic Receptor kinase substrate motif;Calmodulin-dependent protein kinase II substrate motif;Casein kinase II substrate motif;G protein-coupled receptor kinase 1 substrate motif;PKA kinase substrate motif;PKC epsilon kinase substrate motif;PKC kinase substrate motif	+	CST;HTP	anatomical structure development;axon extension;biological regulation;cell growth;cell projection organization;cellular component movement;cellular component organization;cellular component organization at cellular level;cellular component organization or biogenesis;cellular component organization or biogenesis at cellular level;cellular process;cytoskeleton organization;cytoskeleton-dependent in…	structural molecule activity	cell junction;cell part;cell projection;cell projection part;cytoplasm;cytoplasmic part;cytoskeletal part;cytosol;dendritic spine;intracellular organelle part;intracellular part;macromolecular complex;membrane;microtubule;microtubule associated complex;neuron projection;neuron spine;organelle part;plasma membrane;postsynaptic density;protein complex;synapse part		Acetylation;Celljunction;Cellprojection;Completeproteome;Cytoplasm;Cytoskeleton;Directproteinsequencing;Microtubule;Phosphoprotein;Polymorphism;Referenceproteome;Repeat;S-nitrosylation;Synapse		PS00230	MAP1B_NEURAXIN	0.999349	3.37001e-10	160.81	130.12	157.83	-0.53891	2557600000	0.389205	0.154975	0.166196	P46821
0.952333	1.03562	1.06932	1.0299	0.958266	1.00757	1.04885	0.960918	0.98014	0.992857	1.02285	1.04591	0.979507	0.986303	1.02626	1.04979	1.00952	1.04973	0.962851	0.779989	1.12307	1.00504	1.02086	1.00011	S	73	4	___1	14-3-3 domain binding motif;Calmodulin-dependent protein kinase II substrate motif;Cdc2 kinase substrate motif;CDK kinase substrate motif;CDK1,2,4,6 kinase substrate motif;CLK1 kinase substrate motif;ERK1,2 kinase substrate motif;G protein-coupled receptor kinase 1 substrate motif;Growth associated histone HI kinase substrate motif;GSK-3, ERK1, ERK2, CDK5 substrate motif;PKA kinase substrate moti…	+	CST;HTP	biological regulation;cellular macromolecule metabolic process;cellular metabolic process;cellular nitrogen compound metabolic process;cellular process;cellular response to biotic stimulus;cellular response to chemical stimulus;cellular response to cytokine stimulus;cellular response to interleukin-1;cellular response to lipopolysaccharide;cellular response to molecule of bacterial origin;cellula…		catalytic step 2 spliceosome;cell part;cytoplasm;extracellular membrane-bounded organelle;extracellular organelle;extracellular region part;extracellular vesicular exosome;intracellular membrane-bounded organelle;intracellular organelle;intracellular organelle part;intracellular part;macromolecular complex;membrane-bounded organelle;membrane-bounded vesicle;nuclear part;nucleoplasm;nucleus;organe…		Alternativesplicing;Coiledcoil;Completeproteome;Developmentalprotein;Immunity;Innateimmunity;mRNAprocessing;mRNAsplicing;Nucleus;Phosphoprotein;Referenceproteome;Spliceosome	C complex spliceosome;Spliceosome			0.897575	0.00418669	73.887	41.669	61.353	0.0072404	470180000	0.854934	0.445312	0.170125	Q8WUQ7
1.03468	1.00817	1.02209	1.01371	1.09832	1.02949	1.01797	1.1016	1.04001	0.995571	0.979028	0.976892	0.999882	0.988863	0.997544	1.0022	1.07279	1.01746	1.00972	1.0362	1.04579	1.03543	0.987619	0.970451	S	436	3	___1	b-Adrenergic Receptor kinase substrate motif;Casein kinase II substrate motif;Pyruvate dehydrogenase kinase substrate motif	+	CST;HTP	anion transport;biological regulation;blood coagulation;carboxylic acid metabolic process;carboxylic acid transport;cell migration;cell motility;cellular component movement;cellular ketone metabolic process;cellular metabolic process;cellular process;coagulation;establishment of localization;hemostasis;immune system process;ion transmembrane transport;ion transport;lactate transmembrane transport…	active transmembrane transporter activity;carboxylic acid transmembrane transporter activity;lactate transmembrane transporter activity;monocarboxylic acid transmembrane transporter activity;organic acid transmembrane transporter activity;secondary active monocarboxylate transmembrane transporter activity;secondary active transmembrane transporter activity;substrate-specific transmembrane transpo…	actin cytoskeleton;cell part;cytoskeleton;integral to membrane;integral to plasma membrane;intracellular non-membrane-bounded organelle;intracellular organelle;intracellular organelle part;intracellular part;intrinsic to membrane;intrinsic to plasma membrane;membrane;membrane part;non-membrane-bounded organelle;nuclear membrane;nuclear part;organelle;organelle membrane;organelle part;plasma membr…		Cellmembrane;Completeproteome;Directproteinsequencing;Membrane;Phosphoprotein;Referenceproteome;Symport;Transmembrane;Transmembranehelix;Transport		PS50850	MFS	1	1.12685e-05	99.392	81.254	83.894	0.60125	317580000	0.0181721	0.38001	0.17088	O15427
0.971135	0.995261	1.01306	0.997252	1.00164	0.993011	1.00463	0.988316	1.01426	0.982642	0.988776	0.987552	1.02288	0.979266	0.996177	1.00469	1.04973	1.02179	0.958805	1.01364	1.09434	1.06576	1.01777	1.03066	S	214	5	___1	b-Adrenergic Receptor kinase substrate motif;Casein kinase II substrate motif	+	CST;HTP	biological regulation;biosynthetic process;cellular biosynthetic process;cellular macromolecule biosynthetic process;cellular macromolecule metabolic process;cellular metabolic process;cellular process;cellular protein metabolic process;gene expression;macromolecule biosynthetic process;macromolecule metabolic process;metabolic process;posttranscriptional regulation of gene expression;primary met…	binding;catalytic activity;GTP binding;GTPase activity;guanyl nucleotide binding;guanyl ribonucleotide binding;hydrolase activity;hydrolase activity, acting on acid anhydrides;hydrolase activity, acting on acid anhydrides, in phosphorus-containing anhydrides;nucleic acid binding;nucleoside-triphosphatase activity;nucleotide binding;purine nucleotide binding;purine ribonucleoside triphosphate bind…	cell part;cytoplasm;cytoplasmic part;cytosol;intracellular part	RNA transport	Completeproteome;Cytoplasm;Directproteinsequencing;GTP-binding;Initiationfactor;Nucleotide-binding;Phosphoprotein;Polymorphism;Proteinbiosynthesis;Referenceproteome		PS51722	G_TR_2	1	1.182e-53	274.48	249.07	142.32	0.96491	29672000000	0.0173668	0.136576	0.172521	O60841
0.965136	0.993991	1.03073	1.03453	1.10711	1.03298	1.04693	1.05631	1.14429	1.03349	0.991171	0.97442	1.04449	1.0318	1.05526	0.992809	1.08873	1.04796	1.04516	1.00905	1.00645	1.05569	0.991248	1.01103	S	236	2	___1	14-3-3 domain binding motif;b-Adrenergic Receptor kinase substrate motif;Calmodulin-dependent protein kinase II substrate motif;Casein kinase II substrate motif;MAPKAPK1 kinase substrate motif;PAK2 kinase substrate motif;Pim1 kinase substrate sequence;PKA kinase substrate motif;PKC epsilon kinase substrate motif;PKC kinase substrate motif;Pyruvate dehydrogenase kinase substrate motif;ZIP kinase s…	+	CST;HTP	cellular macromolecule metabolic process;cellular metabolic process;cellular nitrogen compound metabolic process;cellular process;macromolecule metabolic process;metabolic process;mRNA metabolic process;mRNA processing;nitrogen compound metabolic process;nuclear mRNA splicing, via spliceosome;nucleic acid metabolic process;nucleobase-containing compound metabolic process;primary metabolic process…	binding;nucleotide binding	cell part;intracellular membrane-bounded organelle;intracellular non-membrane-bounded organelle;intracellular organelle;intracellular organelle part;intracellular part;membrane-bounded organelle;non-membrane-bounded organelle;nuclear part;nucleolus;nucleus;organelle;organelle part	Spliceosome	Acetylation;Alternativesplicing;Completeproteome;mRNAprocessing;mRNAsplicing;Nucleus;Phosphoprotein;Referenceproteome;RNA-binding		PS50102	RRM	1	0.000182754	104.95	67.352	104.95	0.13223	518660000	0.997318	0.64684	0.176147	Q13595
1.00951	0.994678	1.02356	1.01023	1.05375	1.01482	1.01002	1.0377	1.01091	0.989811	0.982723	0.957085	1.0068	0.986712	1.00889	0.984184	1.05621	1.02113	1.04093	1.02932	1.02543	1.03976	1.00355	0.997653	T	327	3	___1	Casein kinase II substrate motif;ERK1,2 kinase substrate motif;GSK3, Erk1, Erk2 and CDK5 kinase motif;GSK-3, ERK1, ERK2, CDK5 substrate motif;WW domain binding motif	+	CST;HTP	activation of immune response;alpha-beta T cell activation;antigen receptor-mediated signaling pathway;ATP biosynthetic process;ATP metabolic process;ATP synthesis coupled proton transport;biological regulation;biosynthetic process;calcium ion homeostasis;calcium ion transport;cation homeostasis;cation transport;CD4-positive, alpha-beta T cell activation;cell activation;cell surface receptor link…	binding;enzyme binding;GTPase binding;protein binding;receptor binding	cell part;cytoplasmic part;cytoskeleton;extrinsic to membrane;extrinsic to plasma membrane;intracellular non-membrane-bounded organelle;intracellular organelle;intracellular organelle part;intracellular part;membrane;membrane part;membrane raft;membrane-enclosed lumen;mitochondrial inner membrane;mitochondrial intermembrane space;mitochondrial membrane;mitochondrial part;non-membrane-bounded orga…		Acetylation;Alternativesplicing;Cellmembrane;Coiledcoil;Completeproteome;Directproteinsequencing;Lipid-binding;Membrane;Mitochondrion;Mitochondrioninnermembrane;Phosphoprotein;Polymorphism;Referenceproteome;Transitpeptide				0.999801	2.24609e-37	203.56	181.51	108.75	0.67855	334750000	0.000872486	0.487145	0.178476	Q9UJZ1
0.933233	1.00557	1.01493	0.99448	0.98377	1.00517	1.0005	0.968678	1.10186	1.00432	0.973086	1.01402	1.04382	0.997196	0.98985	1.04385	1.05748	1.03562	1.00089	1.01926	1.06177	1.16268	1.06096	1.0057	S	246	3	___3	b-Adrenergic Receptor kinase substrate motif;MAPKAPK2 kinase substrate motif;PKA kinase substrate motif;PKC kinase substrate motif	+	CST;HTP;LTP	activation-induced cell death of T cells;anatomical structure development;anatomical structure morphogenesis;apoptosis;biological regulation;biosynthetic process;carbohydrate homeostasis;catabolic process;cell activation;cell activation involved in immune response;cell cycle checkpoint;cell cycle phase;cell cycle process;cell death;cell development;cell differentiation;cell proliferation;cell sur…	binding;enzyme binding;kinase binding;protein binding;protein kinase binding;structural constituent of ribosome;structural molecule activity	cell body;cell part;cell projection;cytoplasm;cytoplasmic part;cytosol;cytosolic small ribosomal subunit;dendrite;intracellular membrane-bounded organelle;intracellular non-membrane-bounded organelle;intracellular organelle;intracellular organelle part;intracellular part;macromolecular complex;membrane;membrane-bounded organelle;neuron projection;non-membrane-bounded organelle;nuclear part;nucleo…	Insulin signaling pathway;mTOR signaling pathway;Ribosome	3D-structure;Acetylation;Completeproteome;Directproteinsequencing;Phosphoprotein;Polymorphism;Referenceproteome;Ribonucleoprotein;Ribosomalprotein	40S ribosomal subunit, cytoplasmic;Nop56p-associated pre-rRNA complex;Ribosome, cytoplasmic	PS00578	RIBOSOMAL_S6E	0.873763	1.5232e-09	126.26	108.01	88.951	-0.13665	982080000	0.0110528	0.332254	0.178916	P62753
0.965147	1.00672	1.01595	1.06059	0.99559	1.01786	1.0121	0.95467	1.10702	0.998323	0.979743	1.1167	1.04194	1.00516	1.00097	1.1534	1.02025	1.05671	0.943779	0.861999	1.01534	1.39823	0.993919	0.949614	S	569	4	___1	Casein kinase I substrate motif	+	CST;HTP	cellular macromolecule metabolic process;cellular metabolic process;cellular nitrogen compound metabolic process;cellular process;macromolecule metabolic process;macromolecule modification;metabolic process;ncRNA metabolic process;ncRNA processing;nitrogen compound metabolic process;nucleic acid metabolic process;nucleobase-containing compound metabolic process;primary metabolic process;RNA metab…	binding;nucleic acid binding;RNA binding;snoRNA binding	box C/D snoRNP complex;cell part;cytoplasm;intracellular non-membrane-bounded organelle;intracellular organelle;intracellular organelle part;intracellular part;macromolecular complex;membrane;non-membrane-bounded organelle;nuclear part;nucleolar part;nucleolus;nucleoplasm;organelle;organelle part;preribosome;pre-snoRNP complex;ribonucleoprotein complex;small nucleolar ribonucleoprotein complex;sm…	Ribosome biogenesis in eukaryotes	Acetylation;Completeproteome;Cytoplasm;Directproteinsequencing;Neurodegeneration;Nucleus;Phosphoprotein;Polymorphism;Referenceproteome;Ribonucleoprotein;Ribosomebiogenesis;Spinocerebellarataxia	Nop56p-associated pre-rRNA complex	PS51358	NOP	1	3.28663e-47	256.92	186.94	103.84	-0.93376	1937100000	0.609832	0.313794	0.17984	O00567
0.987753	1.03444	0.989304	1.01194	0.971519	1.00784	1.00038	0.99591	1.02499	0.984743	1.00343	0.995578	1.01028	0.972816	0.997522	1.00438	1.07197	0.993157	0.998366	1.04341	1.08419	1.06282	1.0308	1.01532	S	692	2	___1	Casein kinase I substrate motif;ERK1,2 kinase substrate motif;G protein-coupled receptor kinase 1 substrate motif;GSK3 kinase substrate motif;GSK-3, ERK1, ERK2, CDK5 substrate motif;MDC1 BRCT domain binding motif;Plk1 PBD domain binding motif;WW domain binding motif	+	CST;HTP;LTP	biological regulation;negative regulation of apoptosis;negative regulation of biological process;negative regulation of cell death;negative regulation of cellular process;negative regulation of programmed cell death;regulation of apoptosis;regulation of biological process;regulation of cell death;regulation of cellular process;regulation of programmed cell death		actin cytoskeleton;adherens junction;anchoring junction;cell junction;cell part;cytoplasm;cytoplasmic part;cytoskeleton;cytosol;extracellular membrane-bounded organelle;extracellular organelle;extracellular region part;extracellular vesicular exosome;intracellular membrane-bounded organelle;intracellular non-membrane-bounded organelle;intracellular organelle;intracellular organelle part;intracell…		Alternativesplicing;Celljunction;Completeproteome;Cytoplasm;Directproteinsequencing;Phosphoprotein;Referenceproteome		PS50003	PH_DOMAIN	0.96595	2.1698e-33	213.48	194.21	91.961	-0.76368	17469000000	0.00512689	0.921037	0.180524	Q96TA1
0.994849	0.998761	1.03216	1.01852	1.04962	1.02468	1.02311	0.980686	0.975184	0.996387	0.983374	1.01571	0.977715	0.991497	1.00218	1.04581	1.01563	1.02085	1.16138	0.934254	0.96763	0.913948	0.998401	0.954154	S	978	2	___1	b-Adrenergic Receptor kinase substrate motif;Casein kinase II substrate motif;ERK1,2 kinase substrate motif;GSK-3, ERK1, ERK2, CDK5 substrate motif;MAPKAPK2 kinase substrate motif;PKA kinase substrate motif;PKC kinase substrate motif;WW domain binding motif	+	CST;HTP	activation of JUN kinase activity;activation of MAPK activity;activation of MAPKKK activity;activation of protein kinase activity;activation of signaling protein activity involved in unfolded protein response;anatomical structure formation involved in morphogenesis;anatomical structure morphogenesis;angiogenesis;apoptosis;apoptosis in response to endoplasmic reticulum stress;biological regulation…	14-3-3 protein binding;binding;binding, bridging;cytokine receptor binding;death receptor binding;enzyme activator activity;enzyme binding;enzyme regulator activity;growth factor receptor binding;GTPase activator activity;GTPase regulator activity;identical protein binding;kinase binding;lipid binding;mitogen-activated protein kinase kinase binding;mitogen-activated protein kinase kinase kinase b…	axon;cell body;cell body membrane;cell part;cell projection;cerebellar mossy fiber;climbing fiber;cytoplasm;cytoplasmic membrane-bounded vesicle;cytoplasmic part;cytoplasmic vesicle;dendrite;endocytic vesicle;extracellular membrane-bounded organelle;extracellular organelle;extracellular region part;extracellular vesicular exosome;intracellular membrane-bounded organelle;intracellular organelle;in…		Alternativesplicing;Angiogenesis;Apoptosis;Cellcycle;Cellmembrane;Cellprojection;Chromosomalrearrangement;Coiledcoil;Completeproteome;Cytoplasm;Developmentalprotein;Growthregulation;GTPaseactivation;Immunity;Inflammatoryresponse;Innateimmunity;Membrane;Phosphoprotein;Polymorphism;Referenceproteome;Stressresponse;Tumorsuppressor;Unfoldedproteinresponse		PS00509;PS50003;PS50018	PH_DOMAIN;RAS_GTPASE_ACTIV_1;RAS_GTPASE_ACTIV_2	1	0.0175628	96.311	48.275	58.916	0.40651	112750000	0.753468	0.46801	0.180856	Q5VWQ8
0.938469	0.999227	1.02878	1.03148	0.981058	1.0278	1.02503	0.990471	0.951632	0.978527	1.0128	1.04032	1.01308	0.949312	1.00937	1.05181	1.02277	1.03024	0.825057	0.970266	1.12629	1.02132	1.05169	1.11565	S	133	3	___1	14-3-3 domain binding motif;Calmodulin-dependent protein kinase II substrate motif;ERK1,2 kinase substrate motif;Growth associated histone HI kinase substrate motif;GSK-3, ERK1, ERK2, CDK5 substrate motif;PKA kinase substrate motif;PKC kinase substrate motif;WW domain binding motif	+	HTP			cell part;cytoplasm;cytoskeleton;intracellular non-membrane-bounded organelle;intracellular organelle;intracellular part;non-membrane-bounded organelle;organelle		Acetylation;Actin-binding;Alternativesplicing;Completeproteome;Cytoplasm;Cytoskeleton;Phosphoprotein;Polymorphism;Referenceproteome				0.999989	1.27628e-05	98.507	73.188	65.477	-0.57348	790670000	0.977291	0.124302	0.182859	Q6NYC8
0.964153	0.980952	1.0001	1.03973	1.01205	0.993373	0.991488	0.981636	1.04281	1.00007	0.980728	1.03742	1.03838	1.01325	1.01246	1.06688	1.06464	1.01152	0.936006	0.970331	1.11703	1.06383	1.01596	1.04245	S	405	3	___1	Casein kinase I substrate motif	+	HTP	biological regulation;biosynthetic process;cellular biosynthetic process;cellular component assembly;cellular component assembly at cellular level;cellular component organization;cellular component organization at cellular level;cellular component organization or biogenesis;cellular component organization or biogenesis at cellular level;cellular macromolecular complex assembly;cellular macromolec…	binding;endopeptidase activator activity;endopeptidase regulator activity;enzyme activator activity;enzyme binding;enzyme regulator activity;peptidase activator activity;peptidase regulator activity;protease binding;proteasome binding;protein binding;protein complex binding	cell part;cytoplasm;integral to membrane;integral to plasma membrane;intracellular organelle part;intracellular part;intrinsic to membrane;intrinsic to plasma membrane;macromolecular complex;membrane;membrane part;nuclear part;nucleoplasm;organelle part;plasma membrane;plasma membrane part;proteasome complex;protein complex		3D-structure;Acetylation;Completeproteome;Cytoplasm;Isopeptidebond;Nucleus;Phosphoprotein;Proteasome;Referenceproteome;Ublconjugation				1	0.0170237	51.888	46.228	44.294	-0.32074	695390000	0.214514	0.112712	0.183058	Q16186
0.988737	1.0484	0.9872	1.01822	0.945636	1.0125	1.00051	1.0046	1.07781	0.973506	1.00532	1.00014	1.02823	0.964116	0.99659	1.0099	1.07977	0.997105	0.985123	1.07029	1.08137	1.14367	1.03191	1.02551	S	691	4	___1	G protein-coupled receptor kinase 1 substrate motif	+	CST;HTP	biological regulation;negative regulation of apoptosis;negative regulation of biological process;negative regulation of cell death;negative regulation of cellular process;negative regulation of programmed cell death;regulation of apoptosis;regulation of biological process;regulation of cell death;regulation of cellular process;regulation of programmed cell death		actin cytoskeleton;adherens junction;anchoring junction;cell junction;cell part;cytoplasm;cytoplasmic part;cytoskeleton;cytosol;extracellular membrane-bounded organelle;extracellular organelle;extracellular region part;extracellular vesicular exosome;intracellular membrane-bounded organelle;intracellular non-membrane-bounded organelle;intracellular organelle;intracellular organelle part;intracell…		Alternativesplicing;Celljunction;Completeproteome;Cytoplasm;Directproteinsequencing;Phosphoprotein;Referenceproteome		PS50003	PH_DOMAIN	0.934841	5.4576e-06	91.961	67.536	75.97	-0.14368	1927000000	0.03359	0.971127	0.184465	Q96TA1
1.0424	1.02065	1.01541	1.02724	1.07825	1.05297	1.02811	1.03047	1.05993	1.00166	0.979671	0.974484	1.04383	1.02503	1.00087	1.0035	1.0763	1.02739	1.00485	1.02332	1.04242	1.00288	0.951768	0.950379	S	602	2	___1	14-3-3 domain binding motif;Calmodulin-dependent protein kinase II substrate motif;Casein kinase II substrate motif;G protein-coupled receptor kinase 1 substrate motif;MDC1 BRCT domain binding motif;PKA kinase substrate motif;PKC kinase substrate motif;Plk1 PBD domain binding motif	+	CST;HTP	cellular process;cellular response to stimulus;cellular response to stress;response to DNA damage stimulus;response to stimulus;response to stress	adenyl nucleotide binding;adenyl ribonucleotide binding;ATP binding;binding;nucleotide binding;purine nucleotide binding;purine ribonucleoside triphosphate binding;purine ribonucleotide binding;ribonucleotide binding	cell part;intracellular membrane-bounded organelle;intracellular organelle;intracellular part;membrane-bounded organelle;nucleus;organelle		Alternativesplicing;ATP-binding;Completeproteome;DNAdamage;Nucleotide-binding;Nucleus;Phosphoprotein;Polymorphism;Referenceproteome				0.977071	7.13402e-28	192.14	161.88	131.02	-0.72302	86058000	0.22698	0.839294	0.18531	Q96QE3
1.02903	0.990383	0.977214	1.00867	1.09123	1.03543	0.997369	1.09576	1.03676	0.986202	0.9545	0.923203	1.00381	0.972544	0.997111	0.947322	1.05359	1.01083	1.07135	1.0664	1.06275	0.977853	1.05362	1.01595	S	1225	3	___1	Casein kinase II substrate motif;ERK1,2 kinase substrate motif;GSK-3, ERK1, ERK2, CDK5 substrate motif;PKA kinase substrate motif;WW domain binding motif	+	HTP	anatomical structure development;biological regulation;cellular component organization;cellular component organization at cellular level;cellular component organization or biogenesis;cellular component organization or biogenesis at cellular level;cellular process;cytoskeleton organization;developmental process;muscle tissue development;organelle organization;positive regulation of biological proc…	actin binding;actin filament binding;binding;cytoskeletal protein binding;protein binding	actin cytoskeleton;adherens junction;anchoring junction;cell division site part;cell junction;cell part;cell projection;cell-substrate adherens junction;cell-substrate junction;cleavage furrow;contractile fiber part;costamere;cytoplasm;cytoplasmic part;cytoskeletal part;cytoskeleton;focal adhesion;intracellular membrane-bounded organelle;intracellular non-membrane-bounded organelle;intracellular …		3D-structure;Actin-binding;Alternativesplicing;Calcium;Celljunction;Cellmembrane;Cellprojection;Completeproteome;Cytoplasm;Cytoskeleton;Membrane;Phosphoprotein;Polymorphism;Referenceproteome;Repeat	P2X7 receptor signalling complex	PS51089	HP	0.821009	8.74889e-20	166.57	155.31	166.57	-0.14997	51683000	0.00881736	0.440886	0.185978	O95425
0.982133	1.00462	1.02328	0.977006	0.992455	1.00045	1.01568	0.992645	1.0731	0.989794	1.00506	0.971545	1.05006	0.983041	1.01139	0.985859	1.0723	1.04573	0.918984	1.0099	1.09157	1.12876	1.0322	0.997492	T	365	4	___1	Cdc2 kinase substrate motif;CDK1,2,4,6 kinase substrate motif;CDK5 kinase substrate motif;Growth associated histone HI kinase substrate motif;GSK-3, ERK1, ERK2, CDK5 substrate motif;MDC1 BRCT domain binding motif;PKA kinase substrate motif;Plk1 PBD domain binding motif;WW domain binding motif	+	CST;HTP	activation of JUN kinase activity;activation of MAPK activity;biological regulation;cell differentiation;cellular component assembly;cellular component organization;cellular component organization or biogenesis;cellular developmental process;cellular macromolecule metabolic process;cellular metabolic process;cellular process;cellular protein metabolic process;developmental process;endosome transp…	binding;binding, bridging;cytoskeletal protein binding;enzyme binding;JUN kinase binding;kinase binding;kinesin binding;MAP-kinase scaffold activity;protein binding;protein complex scaffold;protein kinase binding;receptor signaling complex scaffold activity;signaling adaptor activity;structural molecule activity	acrosomal vesicle;cell part;cytoplasm;cytoplasmic membrane-bounded vesicle;cytoplasmic part;cytoplasmic vesicle;cytosol;extracellular membrane-bounded organelle;extracellular organelle;extracellular region part;extracellular vesicular exosome;integral to membrane;intracellular membrane-bounded organelle;intracellular organelle;intracellular part;intrinsic to membrane;membrane part;membrane-bounde…		3D-structure;Acetylation;Alternativesplicing;Coiledcoil;Completeproteome;Cytoplasm;Cytoplasmicvesicle;Phosphoprotein;Polymorphism;Referenceproteome	CHUK-NFKB2-REL-IKBKG-SPAG9-NFKB1-NFKBIE-COPB2-TNIP1-NFKBIA-RELA-TNIP2 complex			0.960749	5.30234e-09	150.28	119.71	109.1	0.243	1139900000	0.127136	0.266326	0.186393	O60271
1.00829	1.01262	1.01239	0.997729	1.03866	1.00684	1.01405	1.00252	0.996314	0.988008	0.997866	0.983249	1.00378	0.994997	1.0112	0.994718	1.03347	1.07539	0.966102	0.95612	1.07019	1.13228	1.01624	0.950673	S	108	4	___1	14-3-3 domain binding motif;Calmodulin-dependent protein kinase II substrate motif;ERK1,2 kinase substrate motif;G protein-coupled receptor kinase 1 substrate motif;GSK-3, ERK1, ERK2, CDK5 substrate motif;PKA kinase substrate motif;PKC kinase substrate motif;WW domain binding motif	+	CST;HTP	cellular macromolecule metabolic process;cellular metabolic process;cellular nitrogen compound metabolic process;cellular process;macromolecule metabolic process;metabolic process;mRNA metabolic process;mRNA processing;nitrogen compound metabolic process;nucleic acid metabolic process;nucleobase-containing compound metabolic process;primary metabolic process;RNA metabolic process;RNA processing;R…	binding;nucleic acid binding;nucleotide binding;RNA binding	cell part;intracellular membrane-bounded organelle;intracellular organelle;intracellular organelle part;intracellular part;macromolecular complex;membrane-bounded organelle;nuclear part;nucleoplasm;nucleus;organelle;organelle part;ribonucleoprotein complex;spliceosomal complex;U12-type spliceosomal complex		3D-structure;Alternativesplicing;Completeproteome;mRNAprocessing;mRNAsplicing;Nucleus;Phosphoprotein;Referenceproteome;Repeat;RNA-binding;Spliceosome	18S U11/U12 snRNP	PS50102	RRM	0.999028	4.48051e-13	146.28	130.14	146.28	0.22511	168110000	0.0876958	0.0964929	0.186605	Q96LT9
0.940214	1.00243	1.02067	0.984822	0.966712	1.00923	1.00849	0.958646	0.932044	0.986904	1.00304	1.03657	0.982373	0.978959	1.00056	1.0401	1.04857	1.02056	1.10496	1.01854	1.02135	0.923951	1.01628	1.02911	S	1195	2	___1	b-Adrenergic Receptor kinase substrate motif;Casein kinase II substrate motif	+	HTP	alpha-beta T cell activation;alpha-beta T cell differentiation;anatomical structure development;biological regulation;biosynthetic process;CD4-positive, alpha-beta T cell activation;CD4-positive, alpha-beta T cell differentiation;CD4-positive, CD25-positive, alpha-beta regulatory T cell differentiation;cell activation;cell differentiation;cell surface receptor linked signaling pathway;cellular bi…	activating transcription factor binding;binding;chromatin binding;DNA binding;enzyme binding;enzyme regulator activity;histone deacetylase binding;histone deacetylase regulator activity;hormone receptor binding;nuclear hormone receptor binding;nucleic acid binding;nucleic acid binding transcription factor activity;protein binding;protein binding transcription factor activity;receptor binding;regu…	cell part;chromatin;chromosomal part;cytoplasm;cytoskeletal part;intracellular membrane-bounded organelle;intracellular organelle;intracellular organelle part;intracellular part;macromolecular complex;membrane;membrane-bounded organelle;microtubule;nuclear chromatin;nuclear chromosome part;nuclear part;nucleoplasm;nucleoplasm part;nucleus;organelle;organelle part;protein complex;spindle microtubu…		3D-structure;Acetylation;Alternativesplicing;Chromatinregulator;Coiledcoil;Completeproteome;DNA-binding;Nucleus;Phosphoprotein;Referenceproteome;Repeat;Repressor;Transcription;Transcriptionregulation;Ublconjugation	Kaiso-NCOR complex;NCOR complex;NCOR1 complex;NCOR2 complex;NCOR-HDAC3 complex;SKI-NCOR1-SIN3A-HDAC1 complex;SMAD2-SKI-NCOR complex;SMAD3-SKI-NCOR complex;SMAD4-SKI-NCOR complex	PS51293	SANT	0.915731	8.08939e-11	141.08	117.36	96.334	-0.035765	482180000	0.204331	0.306624	0.187978	O75376
1.02087	1.02629	1.05919	1.02401	1.03139	1.05061	1.05164	1.01996	1.00106	1.00029	1.01453	0.965926	0.998387	0.989013	1.02107	0.954973	1.08201	1.09965	0.927934	0.834279	1.11216	1.14223	1.02037	1.07352	S	423	4	___1	b-Adrenergic Receptor kinase substrate motif;Casein kinase II substrate motif;PKA kinase substrate motif;PKC kinase substrate motif	+	CST;HTP	anatomical structure development;apoptosis;biological regulation;cardiac cell development;cardiac muscle cell development;cell cycle;cell cycle process;cell death;cell development;cellular component disassembly;cellular component disassembly at cellular level;cellular component disassembly involved in apoptosis;cellular component organization;cellular component organization at cellular level;cell…	structural molecule activity	cell part;cytoplasm;cytoplasmic part;cytoskeletal part;cytosol;envelope;intermediate filament;intracellular membrane-bounded organelle;intracellular organelle;intracellular organelle part;intracellular part;lamin filament;macromolecular complex;membrane;membrane-bounded organelle;nuclear body;nuclear envelope;nuclear lamina;nuclear membrane;nuclear part;nuclear speck;nucleoplasm;nucleoplasm part;…	Arrhythmogenic right ventricular cardiomyopathy (ARVC);Dilated cardiomyopathy;Hypertrophic cardiomyopathy (HCM)	3D-structure;Acetylation;Alternativesplicing;Cardiomyopathy;Charcot-Marie-Toothdisease;Coiledcoil;Completeproteome;Congenitalmusculardystrophy;Directproteinsequencing;Diseasemutation;Emery-Dreifussmusculardystrophy;Intermediatefilament;Isopeptidebond;Limb-girdlemusculardystrophy;Lipoprotein;Methylation;Neurodegeneration;Neuropathy;Nucleus;Phosphoprotein;Polymorphism;Prenylation;Referenceproteome;…	CTCF-nucleophosmin-PARP-HIS-KPNA-LMNA-TOP complex;Emerin architectural complex;Emerin complex 24	PS00226	IF	0.996785	0.000116837	141.23	38.823	118.77	-0.40292	1435800000	0.331909	0.23558	0.18925	P02545
1.00433	1.01178	1.02571	1.03129	1.05979	1.0371	1.02533	1.03391	0.979486	0.990088	1.00014	0.988382	0.997202	1.0015	1.00715	1.0161	1.06802	0.99104	1.12683	0.937868	1.01738	0.927551	0.995347	0.944909	S	119	2	___1	Casein kinase II substrate motif;ERK1,2 kinase substrate motif;G protein-coupled receptor kinase 1 substrate motif;Growth associated histone HI kinase substrate motif;GSK3 kinase substrate motif;GSK-3, ERK1, ERK2, CDK5 substrate motif;PKA kinase substrate motif;PKC kinase substrate motif;WW domain binding motif	+	HTP;LTP	biological adhesion;biological regulation;biosynthetic process;calcium-dependent cell-cell adhesion;cell adhesion;cell cycle;cell cycle process;cell junction assembly;cell junction organization;cell migration;cell motility;cell projection assembly;cell projection organization;cell-cell adhesion;cell-substrate junction assembly;cellular biosynthetic process;cellular component assembly;cellular com…	alpha-catenin binding;binding;cation binding;chromatin binding;ion binding;metal ion binding;protein binding;protein binding transcription factor activity;transcription cofactor activity;transcription corepressor activity;transcription factor binding transcription factor activity;transition metal ion binding;zinc ion binding	adherens junction;anchoring junction;cell junction;cell part;cell projection;cell-cell junction;cell-substrate adherens junction;cell-substrate junction;cytoplasmic mRNA processing body;cytoplasmic part;cytoskeletal part;cytosol;focal adhesion;intracellular membrane-bounded organelle;intracellular non-membrane-bounded organelle;intracellular organelle;intracellular organelle part;intracellular pa…		Alternativesplicing;Celladhesion;Cellcycle;Celljunction;Cellmembrane;Completeproteome;Cytoplasm;Cytoskeleton;LIMdomain;Membrane;Metal-binding;Nucleus;Phosphoprotein;Referenceproteome;Repeat;Repressor;RNA-mediatedgenesilencing;Transcription;Transcriptionregulation;Zinc		PS00478;PS50023	LIM_DOMAIN_1;LIM_DOMAIN_2	1	3.49916e-15	199.12	168.32	179.6	-0.025478	497980000	0.309358	0.898082	0.189849	Q96IF1
0.994154	1.01036	1.03807	1.00442	1.03084	1.02187	1.03323	0.989013	1.06891	0.983294	0.98381	1.00595	1.01942	0.985721	0.998819	1.01601	1.03951	1.05207	0.959491	0.990524	1.04841	1.18287	1.01594	0.968611	S	498	2	___1	G protein-coupled receptor kinase 1 substrate motif;GSK3 kinase substrate motif;MAPKAPK2 kinase substrate motif	+	CST	activation of MAPK activity;alcohol metabolic process;autophagy;biological regulation;biosynthetic process;carbohydrate homeostasis;carbohydrate metabolic process;carboxylic acid biosynthetic process;carboxylic acid metabolic process;catabolic process;cell communication;cell cycle arrest;cell cycle process;cell surface receptor linked signaling pathway;cellular biosynthetic process;cellular carbo…	[acetyl-CoA carboxylase] kinase activity;[hydroxymethylglutaryl-CoA reductase (NADPH)] kinase activity;adenyl nucleotide binding;adenyl ribonucleotide binding;AMP-activated protein kinase activity;ATP binding;binding;cAMP-dependent protein kinase activity;catalytic activity;cation binding;chromatin binding;cyclic nucleotide-dependent protein kinase activity;histone kinase activity;histone serine …	AMP-activated protein kinase complex;apical plasma membrane;cell part;cytoplasm;cytoplasmic part;cytosol;intracellular;intracellular membrane-bounded organelle;intracellular organelle;intracellular organelle part;intracellular part;macromolecular complex;membrane part;membrane-bounded organelle;nuclear part;nucleoplasm;nucleus;organelle;organelle part;plasma membrane part;protein complex	Adipocytokine signaling pathway;Hypertrophic cardiomyopathy (HCM);Insulin signaling pathway;mTOR signaling pathway;Regulation of autophagy	3D-structure;Alternativesplicing;ATP-binding;Autophagy;Biologicalrhythms;Cholesterolbiosynthesis;Cholesterolmetabolism;Chromatinregulator;Completeproteome;Cytoplasm;Fattyacidbiosynthesis;Fattyacidmetabolism;Kinase;Lipidbiosynthesis;Lipidmetabolism;Magnesium;Metal-binding;Nucleotide-binding;Nucleus;Phosphoprotein;Polymorphism;Referenceproteome;Serine/threonine-proteinkinase;Steroidbiosynthesis;Ste…	NDPKA-AMPKalpha1 complex	PS00107;PS00108;PS50011	PROTEIN_KINASE_ATP;PROTEIN_KINASE_DOM;PROTEIN_KINASE_ST	0.816638	0.00241604	117.84	88.756	117.84	0.60185	1152300000	0.292459	0.258291	0.190633	Q13131
1.01383	0.978061	1.01438	1.03063	1.04695	0.988496	1.00916	0.956266	1.05462	0.966501	0.96946	1.10835	1.0373	0.986526	1.00408	1.13055	1.09011	1.01871	0.909623	0.97121	1.14681	1.14621	1.01533	0.989085	S	1438	2	___1	ATM kinase substrate motif;Casein kinase II substrate motif;DNA dependent Protein kinase substrate motif;MAPKAPK2 kinase substrate motif	+	CST;HTP	anatomical structure morphogenesis;axonogenesis;biological regulation;cell differentiation;cell part morphogenesis;cell projection morphogenesis;cell projection organization;cellular component morphogenesis;cellular component organization;cellular component organization at cellular level;cellular component organization or biogenesis;cellular component organization or biogenesis at cellular level;…	binding;enzyme binding;enzyme regulator activity;GTPase binding;GTPase regulator activity;guanyl-nucleotide exchange factor activity;nucleoside-triphosphatase regulator activity;protein binding;Rac GTPase binding;Ras GTPase binding;Rho GTPase binding;small GTPase binding	adherens junction;anchoring junction;axon;basal part of cell;cell junction;cell part;cell projection;cell projection part;cell-substrate adherens junction;cell-substrate junction;focal adhesion;growth cone;neuron projection;site of polarized growth		Acetylation;Alternativesplicing;Cellprojection;Coiledcoil;Completeproteome;Developmentalprotein;Differentiation;Epilepsy;Guanine-nucleotidereleasingfactor;Neurogenesis;Phosphoprotein;Polymorphism;Referenceproteome		PS51650;PS51651	DHR_1;DHR_2	0.999888	1.58059e-09	150.05	123.39	150.05	-3.0717	108310000	0.461519	0.218481	0.191055	Q96N67
0.920033	1.00919	1.025	1.03698	0.971461	1.01537	1.01339	1.00551	1.03679	0.98582	1.00764	0.998254	0.986314	0.958571	1.00484	0.989181	1.09278	1.02036	1.07199	1.08323	1.05752	0.967375	0.985224	1.05167	S	182	2	___1	PKA kinase substrate motif;PKC kinase substrate motif	+	CST;HTP	biosynthetic process;cellular biosynthetic process;cellular macromolecule biosynthetic process;cellular macromolecule metabolic process;cellular metabolic process;cellular nitrogen compound metabolic process;cellular process;DNA metabolic process;DNA replication;DNA replication involved in S phase;DNA-dependent DNA replication;establishment of localization;establishment of localization in cell;es…	binding;histone pre-mRNA DCP binding;histone pre-mRNA stem-loop binding;mRNA binding;nucleic acid binding;pre-mRNA binding;RNA binding	cell part;cytoplasm;cytoplasmic part;cytosol;histone pre-mRNA 3'end processing complex;intracellular membrane-bounded organelle;intracellular organelle;intracellular organelle part;intracellular part;macromolecular complex;membrane-bounded organelle;nuclear part;nucleoplasm;nucleus;organelle;organelle part;ribonucleoprotein complex		3D-structure;Alternativesplicing;Completeproteome;Cytoplasm;mRNAprocessing;Nucleus;Phosphoprotein;Referenceproteome;Ribonucleoprotein;RNA-binding				1	1.42651e-05	118.76	91.12	101.38	-2.3432	253540000	0.0466126	0.0655807	0.191543	Q14493
1.00619	1.01017	1.02889	1.03855	1.06814	1.06653	1.06049	0.993002	1.0941	1.03364	0.966854	1.0778	1.0309	1.04938	1.02306	1.09615	1.0413	1.04214	1.06083	1.04727	0.991027	1.0407	0.992865	0.992956	T	455	2	___1	Casein kinase II substrate motif;Growth associated histone HI kinase substrate motif;GSK-3, ERK1, ERK2, CDK5 substrate motif;MDC1 BRCT domain binding motif;PKA kinase substrate motif;PKC kinase substrate motif;Plk1 PBD domain binding motif;WW domain binding motif	+	CST;LTP	biological regulation;cell cycle;cell cycle phase;cell cycle process;cellular component organization;cellular component organization at cellular level;cellular component organization or biogenesis;cellular component organization or biogenesis at cellular level;cellular process;G1/S transition of mitotic cell cycle;G2/M transition of mitotic cell cycle;mitosis;mitotic cell cycle;negative regulatio…	adenyl nucleotide binding;adenyl ribonucleotide binding;ATP binding;binding;catalytic activity;cation binding;ion binding;kinase activity;metal ion binding;nucleotide binding;phosphotransferase activity, alcohol group as acceptor;protein kinase activity;protein serine/threonine kinase activity;purine nucleotide binding;purine ribonucleoside triphosphate binding;purine ribonucleotide binding;ribon…	cell part;cytoplasmic part;cytosol;endoplasmic reticulum;endoplasmic reticulum membrane;endoplasmic reticulum part;Golgi apparatus;Golgi apparatus part;Golgi membrane;intracellular membrane-bounded organelle;intracellular organelle;intracellular organelle part;intracellular part;membrane;membrane part;membrane-bounded organelle;nuclear part;nucleoplasm;organelle;organelle membrane;organelle part	Cell cycle;Oocyte meiosis;Progesterone-mediated oocyte maturation	3D-structure;Acetylation;Alternativesplicing;ATP-binding;Cellcycle;Completeproteome;Endoplasmicreticulum;Golgiapparatus;Kinase;Magnesium;Membrane;Metal-binding;Nucleotide-binding;Phosphoprotein;Polymorphism;Referenceproteome;Serine/threonine-proteinkinase;Transferase		PS00107;PS00108;PS50011	PROTEIN_KINASE_ATP;PROTEIN_KINASE_DOM;PROTEIN_KINASE_ST	0.997504	0.000817523	127.94	83.253	125.57	0.20683	196690000	0.638473	0.990839	0.192072	Q99640
1.00202	1.00054	1.02495	1.03146	1.04668	1.02277	1.01793	1.0268	1.00773	0.998016	0.980345	0.974315	1.0046	0.994364	0.998291	1.00205	1.06782	1.01079	1.05244	1.00696	1.04951	0.984056	0.999257	0.965443	S	1029	3	___1	ERK1,2 kinase substrate motif;GSK-3, ERK1, ERK2, CDK5 substrate motif;WW domain binding motif	+	CST;HTP	biological regulation;cellular process;cellular response to stimulus;intracellular signal transduction;positive regulation of catalytic activity;positive regulation of GTPase activity;positive regulation of hydrolase activity;positive regulation of molecular function;Ras protein signal transduction;regulation of biological process;regulation of catabolic process;regulation of catalytic activity;r…	binding;cation binding;enzyme activator activity;enzyme regulator activity;GTPase activator activity;GTPase regulator activity;ion binding;metal ion binding;nucleoside-triphosphatase regulator activity;PDZ domain binding;protein binding;protein domain specific binding	cell part;cytoplasmic part;cytosol;intracellular part		Alternativesplicing;Coiledcoil;Completeproteome;Directproteinsequencing;GTPaseactivation;Metal-binding;Phosphoprotein;Polymorphism;Referenceproteome;Zinc;Zinc-finger		PS00479;PS50081;PS50238;PS51741	F_BAR;RHOGAP;ZF_DAG_PE_1;ZF_DAG_PE_2	1	1.19728e-06	152.69	103.25	123.76	-1.7377	165370000	0.0206297	0.983	0.192411	Q52LW3
0.944183	0.9796	1.00182	1.03446	0.9736	0.994121	0.995431	0.973741	1.02031	0.980868	0.981226	1.02766	1.07578	0.970979	0.987711	1.05206	1.04669	1.03792	0.900558	0.948403	1.10747	1.07211	1.01295	1.01518	S	50	5	___1	Casein kinase II substrate motif;PKA kinase substrate motif;PKC kinase substrate motif	+	CST;HTP					Acetylation;Completeproteome;Phosphoprotein;Polymorphism;Referenceproteome				1	1.95634e-74	261.79	245.52	217.57	0.09328	3385100000	0.374726	0.155853	0.192427	Q96AT1
0.959296	0.987122	1.01305	1.01055	1.00937	1.0072	0.987396	0.998848	0.935857	0.969572	1.01173	1.06445	0.993014	0.952862	1.00947	1.06625	1.0417	1.02985	0.886281	0.881276	1.08111	1.0471	1.03814	1.05935	S	279	4	___1	14-3-3 domain binding motif;Akt kinase substrate motif;b-Adrenergic Receptor kinase substrate motif;Calmodulin-dependent protein kinase II substrate motif;MAPKAPK1 kinase substrate motif;PKA kinase substrate motif;PKC epsilon kinase substrate motif;PKC kinase substrate motif	+	CST;HTP	biological regulation;biosynthetic process;cell cycle;cell surface receptor linked signaling pathway;cellular biosynthetic process;cellular macromolecule biosynthetic process;cellular macromolecule metabolic process;cellular metabolic process;cellular nitrogen compound metabolic process;cellular process;cellular response to stimulus;macromolecule biosynthetic process;macromolecule metabolic proce…	binding;DNA binding;histone acetyl-lysine binding;histone binding;nucleic acid binding;p53 binding;protein binding;protein binding transcription factor activity;regulatory region DNA binding;regulatory region nucleic acid binding;transcription coactivator activity;transcription cofactor activity;transcription corepressor activity;transcription factor binding;transcription factor binding transcrip…	cell part;cytoplasm;intracellular membrane-bounded organelle;intracellular organelle;intracellular part;membrane-bounded organelle;nucleus;organelle		3D-structure;Acetylation;Alternativesplicing;Bromodomain;Cellcycle;Coiledcoil;Completeproteome;Nucleus;Phosphoprotein;Referenceproteome;Transcription;Transcriptionregulation;Tumorsuppressor;Wntsignalingpathway		PS50014	BROMODOMAIN_2	1	1.91428e-10	154.46	98.8	97.502	0.40967	229580000	0.983476	0.113037	0.19294	Q9NPI1
0.925433	1.02538	1.0299	1.00703	0.955589	1.06152	1.04062	0.986865	1.03192	0.995467	0.973596	1.03456	1.02014	1.02407	0.990214	1.04336	1.08028	1.01486	1.02631	0.996651	1.03078	0.885625	0.980037	0.987631	S	485	4	___1	Calmodulin-dependent protein kinase II substrate motif;Chk1 kinase substrate motif;G protein-coupled receptor kinase 1 substrate motif;MAPKAPK2 kinase substrate motif;Phosphorylase kinase substrate motif;PKA kinase substrate motif;PKC kinase substrate motif	+	CST;HTP	biological regulation;cell cycle cytokinesis;cell cycle phase;cell cycle process;cell differentiation;cellular component assembly;cellular component assembly at cellular level;cellular component organization;cellular component organization at cellular level;cellular component organization or biogenesis;cellular component organization or biogenesis at cellular level;cellular developmental process;…	actin binding;binding;cytoskeletal protein binding;protein binding	actin cytoskeleton;actomyosin contractile ring;cell cortex part;cell division site part;cell part;contractile ring;cytoplasmic part;cytoskeletal part;cytoskeleton;intracellular membrane-bounded organelle;intracellular non-membrane-bounded organelle;intracellular organelle;intracellular organelle part;intracellular part;membrane-bounded organelle;non-membrane-bounded organelle;nuclear part;nucleop…		3D-structure;Acetylation;Actin-binding;Alternativesplicing;Cellcycle;Celldivision;Coiledcoil;Completeproteome;Cytoplasm;Cytoskeleton;Diseasemutation;Mitosis;Nucleus;Phosphoprotein;Polymorphism;Referenceproteome;Ublconjugation		PS50003	PH_DOMAIN	0.989628	4.68467e-05	171.09	120.11	80.596	-0.44517	2450400000	0.847119	0.591043	0.19372	Q9NQW6
0.967786	1.01145	1.02769	1.01212	1.00634	1.00739	1.01175	1.01362	0.945473	0.976802	1.01858	0.996245	0.994943	0.962032	1.011	1.00604	1.03719	1.02775	0.93946	0.927414	1.06417	1.05078	1.02047	0.993413	S	15	3	___1	14-3-3 domain binding motif;AMP-activated protein kinase substrate motif;BARD1 BRCT domain binding motif;Calmodulin-dependent protein kinase I substrate motif;Calmodulin-dependent protein kinase II substrate motif;Calmodulin-dependent protein kinase IV substrate motif;Casein kinase II substrate motif;Chk1 kinase substrate motif;G protein-coupled receptor kinase 1 substrate motif;PKA kinase substr…	+	HTP	cellular macromolecule metabolic process;cellular metabolic process;cellular process;cellular protein metabolic process;macromolecule metabolic process;metabolic process;primary metabolic process;protein folding;protein metabolic process	binding;cation binding;ion binding;metal ion binding;transition metal ion binding;zinc ion binding	cell part;cytoplasmic part;intracellular non-membrane-bounded organelle;intracellular organelle;intracellular part;macromolecular complex;non-membrane-bounded organelle;organelle;ribonucleoprotein complex;ribosome		Alternativesplicing;Chaperone;Completeproteome;Metal-binding;Phosphoprotein;Polymorphism;Referenceproteome;Repeat;Zinc;Zinc-finger		PS00028;PS00636;PS50076;PS50157	DNAJ_1;DNAJ_2;ZINC_FINGER_C2H2_1;ZINC_FINGER_C2H2_2	1	0.00486733	61.649	38.77	60.55	0.5456	73321000	0.394786	0.104393	0.194573	Q5F1R6
0.935937	0.99124	1.08142	1.00667	0.967069	1.0106	1.05706	0.947554	1.01374	0.983958	0.980712	0.967288	1.02854	0.971829	0.996564	1.01015	1.07404	0.998709	1.09827	1.13646	1.07335	0.947454	0.97937	1.04037	Y	263	2	___1	JAK2 kinase substrate motif;SHIP2 SH2 domain binding motif;SHP1 C-terminal SH2 domain binding motif;SHP1 phosphatase substrate motif;SHP1 SH2 domain binding motif;SHP2 CSH2 domain binding motif;SHP2 N-terminal SH2 domain binding motif;Src family kinase substrate motif;Src kinase substrate motif	+	CST;HTP;LTP	biological regulation;cell communication;cell surface receptor linked signaling pathway;cell-cell signaling;cellular process;cellular response to stimulus;enzyme linked receptor protein signaling pathway;regulation of biological process;regulation of cellular process;response to stimulus;signal transduction;signaling;transmembrane receptor protein tyrosine kinase signaling pathway	structural molecule activity	adherens junction;anchoring junction;cell junction;cell part;cell surface;cell-substrate adherens junction;cell-substrate junction;focal adhesion;integral to membrane;integral to plasma membrane;intrinsic to membrane;intrinsic to plasma membrane;membrane part;plasma membrane part	Cell adhesion molecules (CAMs)	Alternativesplicing;Completeproteome;Directproteinsequencing;Disulfidebond;Glycoprotein;Immunoglobulindomain;Membrane;Phosphoprotein;Referenceproteome;Signal;Transmembrane;Transmembranehelix		PS50835	IG_LIKE	0.999999	2.27093e-06	154.75	121.75	154.75	0.80014	98909000	0.125706	0.262325	0.195273	O95297
1.03088	1.03283	1.03346	1.0098	1.07095	1.03903	1.01764	1.0489	0.993384	0.984027	0.990464	0.934683	0.98085	0.97676	1.00471	0.960899	1.0355	1.05068	1.11646	1.01662	1.01153	1.02417	1.0353	0.963416	S	332	2	___1	Casein kinase II substrate motif;ERK1,2 kinase substrate motif;Growth associated histone HI kinase substrate motif;GSK-3, ERK1, ERK2, CDK5 substrate motif;MDC1 BRCT domain binding motif;PKA kinase substrate motif;PKC kinase substrate motif;Plk1 PBD domain binding motif;WW domain binding motif	+	CST;HTP	anatomical structure development;brain development;developmental process;organ development		axon;cell part;cell projection;cell projection part;integral to membrane;intracellular membrane-bounded organelle;intracellular organelle;intracellular organelle part;intracellular part;intrinsic to membrane;membrane;membrane part;membrane-bounded organelle;neuron projection;neuron projection terminus;nuclear membrane;nuclear part;nucleus;organelle;organelle membrane;organelle part;synapse		Alternativesplicing;Cellprojection;Completeproteome;Glycoprotein;Membrane;Nucleus;Phosphoprotein;Referenceproteome;Transmembrane;Transmembranehelix				0.995047	3.75302e-06	140.01	108.07	132.99	0.087518	602660000	0.000206816	0.743229	0.196176	Q8N5G2
0.945862	1.00997	1.01106	0.987015	1.01565	1.03964	0.999023	1.00274	1.01931	1.01209	0.975848	1.00016	0.982687	1.00975	0.999585	1.02469	1.09661	1.01096	1.11385	0.955473	1.04513	0.895123	1.00971	0.957645	S	175	2	___1	G protein-coupled receptor kinase 1 substrate motif	+	HTP			cell part;integral to membrane;intrinsic to membrane;membrane part		Completeproteome;Membrane;Phosphoprotein;Referenceproteome;Transmembrane;Transmembranehelix				1	3.19003e-06	119.45	104.24	119.45	0.33179	91057000	0.740839	0.626	0.197264	C9JI98
0.994987	1.01374	1.06004	1.04632	0.998377	1.00829	1.01479	0.989804	1.05134	1.01517	1.00418	0.96791	0.99196	1.0202	1.03742	0.986588	1.05693	1.05081	0.999932	0.894076	1.0583	1.10617	1.0048	1.00322	S	138	3	___1	Calmodulin-dependent protein kinase II substrate motif;Chk1 kinase substrate motif;Phosphorylase kinase substrate motif;PKA kinase substrate motif;PKC kinase substrate motif	+	CST;HTP	actin cytoskeleton organization;actin filament bundle assembly;actin filament organization;actin filament-based process;biological regulation;cell junction assembly;cell junction organization;cell projection assembly;cell projection organization;cell-substrate junction assembly;cellular component assembly;cellular component assembly at cellular level;cellular component organization;cellular compo…	binding;catalytic activity;GTP binding;GTPase activity;guanyl nucleotide binding;guanyl ribonucleotide binding;hydrolase activity;hydrolase activity, acting on acid anhydrides;hydrolase activity, acting on acid anhydrides, in phosphorus-containing anhydrides;nucleoside-triphosphatase activity;nucleotide binding;purine nucleotide binding;purine ribonucleoside triphosphate binding;purine ribonucleo…	cell part;cytoplasmic part;cytosol;early endosome;endosomal part;endosome;endosome membrane;intracellular membrane-bounded organelle;intracellular organelle;intracellular organelle part;intracellular part;membrane;membrane-bounded organelle;organelle;organelle membrane;organelle part;plasma membrane	Axon guidance	3D-structure;Cellmembrane;Completeproteome;Endosome;GTP-binding;Lipoprotein;Membrane;Methylation;Nucleotide-binding;Polymorphism;Prenylation;Referenceproteome		PS51420	RHO	1	0.00864825	75.294	27.356	75.294	0.72204	255880000	0.791151	0.70733	0.197529	O00212
0.872397	0.989459	0.994078	0.988613	1.00437	1.00504	0.986237	0.914371	1.06037	0.990998	0.964748	1.04726	1.06446	0.991697	1.02986	1.06206	1.09479	0.962463	1.04692	1.07752	1.04777	0.861448	0.991081	1.01799	S	11	2	___1	Casein kinase II substrate motif;G protein-coupled receptor kinase 1 substrate motif;MAPKAPK2 kinase substrate motif;PKA kinase substrate motif;PKC kinase substrate motif;Pyruvate dehydrogenase kinase substrate motif	+	HTP	biosynthetic process;cellular biosynthetic process;cellular macromolecule biosynthetic process;cellular macromolecule metabolic process;cellular metabolic process;cellular process;cellular protein metabolic process;cotranslational protein targeting to membrane;establishment of localization;establishment of localization in cell;establishment of protein localization;establishment of protein localiz…		cell part;cytoplasmic part;endoplasmic reticulum part;integral to endoplasmic reticulum membrane;integral to membrane;integral to organelle membrane;intracellular organelle part;intracellular part;intrinsic to endoplasmic reticulum membrane;intrinsic to membrane;intrinsic to organelle membrane;macromolecular complex;membrane part;organelle part;protein complex;Sec61 translocon complex;translocon …	Protein processing in endoplasmic reticulum	Alternativesplicing;Completeproteome;Endoplasmicreticulum;Membrane;Phosphoprotein;Referenceproteome;Transmembrane;Transmembranehelix	Oligosaccharyltransferase OSTC-III;Translocon-associated protein (TRAP) complex;Translocon-associated protein complex (TRAP complex)			1	1.8067e-49	284.26	253.69	284.26	0.76984	76100000	0.142864	0.639703	0.197605	Q9UNL2
1.07074	1.04963	1.08088	1.00689	1.09883	1.04145	1.02759	0.994049	0.901932	0.990259	1.02835	1.03927	0.97383	0.989924	1.10209	1.03448	1.06066	1.01811	1.27208	0.968533	1.0139	0.836202	1.0357	0.950075	S	36	3	___1	Calmodulin-dependent protein kinase II substrate motif;Casein kinase II substrate motif;Chk1 kinase substrate motif;G protein-coupled receptor kinase 1 substrate motif;GSK3 kinase substrate motif;PAK2 kinase substrate motif;PKA kinase substrate motif;PKC kinase substrate motif	+	CST;HTP	ATP-dependent chromatin remodeling;biological regulation;cell cycle phase;cell cycle process;cell division;cellular component assembly;cellular component assembly at cellular level;cellular component organization;cellular component organization at cellular level;cellular component organization or biogenesis;cellular component organization or biogenesis at cellular level;cellular macromolecular co…		cell part;chromosomal part;chromosome, centromeric region;cytoplasm;intracellular membrane-bounded organelle;intracellular organelle;intracellular organelle part;intracellular part;membrane-bounded organelle;nuclear part;nucleoplasm;nucleus;organelle;organelle part		Cellcycle;Celldivision;Centromere;Chromosome;Completeproteome;Mitosis;Nucleus;Phosphoprotein;Referenceproteome				0.999931	1.20012e-10	155.94	119.5	73.951	-2.0292	136300000	0.629964	0.425654	0.201603	Q9NYP9
0.911216	1.01244	1.02634	1.04202	0.959028	1.0265	1.02317	1.02001	1.08307	0.960264	0.937626	1.07062	1.0122	0.999481	0.958904	1.08038	1.06179	1.0248	1.03169	1.04279	1.01015	0.912561	0.953072	0.972071	S	1041	3	___1	b-Adrenergic Receptor kinase substrate motif;Casein kinase I substrate motif;Cdc2 kinase substrate motif;CDK kinase substrate motif;CDK1,2,4,6 kinase substrate motif;ERK1,2 kinase substrate motif;GSK-3, ERK1, ERK2, CDK5 substrate motif;MAPKAPK2 kinase substrate motif;WW domain binding motif	+	CST;HTP	biological regulation;biosynthetic process;cell cycle;cell surface receptor linked signaling pathway;cellular biosynthetic process;cellular component organization;cellular component organization at cellular level;cellular component organization or biogenesis;cellular component organization or biogenesis at cellular level;cellular macromolecule biosynthetic process;cellular macromolecule metabolic…	binding;protein binding;transcription factor binding	cell part;intracellular membrane-bounded organelle;intracellular organelle;intracellular organelle part;intracellular part;macromolecular complex;membrane-bounded organelle;nuclear part;nucleoplasm;nucleoplasm part;nucleus;organelle;organelle part;protein complex;transcription factor complex	Cell cycle;TGF-beta signaling pathway	3D-structure;Alternativesplicing;Cellcycle;Chromatinregulator;Completeproteome;Directproteinsequencing;Host-virusinteraction;Nucleus;Phosphoprotein;Polymorphism;Referenceproteome;Repressor;Transcription;Transcriptionregulation;Tumorsuppressor	E2F1-p107-cyclinA complex;E2F4-p107-cyclinA complex;E2F4-p107-cyclinE complex;Emerin complex 32;Emerin regulatory complex;LINC complex, S-phase;SMAD3/4-E2F4/5-p107-DP1 complex;SMAD3-E2F4/5-p107-DP1 complex			1	1.27174e-14	190.85	87.413	114.64	-0.29416	120020000	0.91673	0.331683	0.20199	P28749
0.96851	1.00611	1.03545	0.984072	0.987602	1.00542	1.03579	0.970701	0.996359	0.978366	1.00033	0.984637	1.02187	0.956185	0.987144	0.986244	1.07305	1.06564	0.901093	1.016	1.11154	1.10545	1.03699	0.970051	S	69	2	___2	ERK1,2 kinase substrate motif;Growth associated histone HI kinase substrate motif;GSK-3, ERK1, ERK2, CDK5 substrate motif;PKA kinase substrate motif;PKC kinase substrate motif;WW domain binding motif	+	CST;HTP	viral reproduction		cell part;intracellular membrane-bounded organelle;intracellular non-membrane-bounded organelle;intracellular organelle;intracellular organelle part;intracellular part;membrane-bounded organelle;non-membrane-bounded organelle;nuclear part;nucleolus;nucleoplasm;nucleus;organelle;organelle part		Alternativesplicing;Citrullination;Coiledcoil;Completeproteome;Host-virusinteraction;Nucleus;Phosphoprotein;Polymorphism;Referenceproteome				0.999997	8.36285e-28	199.6	172.79	125.5	-0.24264	5639800000	0.0483693	0.320858	0.202182	Q9H6F5
0.938688	1.02222	1.09789	1.02161	0.985746	1.01351	1.06114	0.94716	1.01297	0.974151	1.01726	1.05179	1.00497	0.974936	1.03428	1.06125	1.01329	1.06684	0.789717	0.906983	1.00988	1.13408	1.01791	1.03031	S	206	3	___1	Casein kinase II substrate motif;Cdc2 kinase substrate motif;CDK kinase substrate motif;CDK1,2,4,6 kinase substrate motif;ERK1,2 kinase substrate motif;Growth associated histone HI kinase substrate motif;GSK-3, ERK1, ERK2, CDK5 substrate motif;MAPKAPK2 kinase substrate motif;WW domain binding motif	+	CST;HTP	cellular macromolecule metabolic process;cellular metabolic process;cellular nitrogen compound metabolic process;cellular process;macromolecule metabolic process;metabolic process;nitrogen compound metabolic process;nucleic acid metabolic process;nucleobase-containing compound metabolic process;primary metabolic process;RNA metabolic process;RNA processing	binding;cation binding;ion binding;metal ion binding	cell part;extracellular region part;extracellular space;intracellular		Acetylation;Alternativesplicing;Coiledcoil;Completeproteome;Metal-binding;Phosphoprotein;Polymorphism;Referenceproteome;Repeat;TPRrepeat;Zinc;Zinc-finger		PS50293	TPR_REGION	0.995888	0.000984627	81.676	44.612	51.998	0.5683	424760000	0.767276	0.322092	0.202715	O60293
0.9562	0.983947	0.988545	1.00863	1.01306	0.999306	1.00143	0.95558	0.917538	0.991377	0.967617	1.03017	0.961013	0.987465	0.994306	1.08145	1.08807	1.00219	1.13359	1.0026	1.07693	0.854506	1.00646	1.06833	S	77	3	___1	Casein kinase I substrate motif;Casein kinase II substrate motif;Pyruvate dehydrogenase kinase substrate motif	+	CST;HTP	apoptosis;biological regulation;biosynthetic process;cell death;cellular biosynthetic process;cellular macromolecule biosynthetic process;cellular macromolecule metabolic process;cellular metabolic process;cellular nitrogen compound metabolic process;cellular process;death;homeostasis of number of cells;homeostatic process;immune system process;leukocyte homeostasis;lymphocyte homeostasis;macromo…	binding;cation binding;DNA binding;ion binding;metal ion binding;nucleic acid binding;nucleic acid binding transcription factor activity;sequence-specific DNA binding;sequence-specific DNA binding transcription factor activity	Cajal body;cell part;chromatin;chromosomal part;histone locus body;intracellular membrane-bounded organelle;intracellular organelle;intracellular organelle part;intracellular part;macromolecular complex;membrane-bounded organelle;nuclear body;nuclear part;nucleoplasm part;nucleus;organelle;organelle part;protein complex;transcription elongation factor complex;transcriptionally active chromatin		Apoptosis;Completeproteome;Metal-binding;Nucleus;Phosphoprotein;Polymorphism;Referenceproteome;Repeat;Repressor;RNA-binding;Transcription;Transcriptionregulation;Zinc;Zinc-finger		PS50103	ZF_C3H1	0.999992	1.11508e-19	172.42	160.22	165.13	-0.58425	182940000	0.453169	0.622466	0.207475	Q8N5P1
1.00481	1.02029	1.01475	1.00202	1.04032	1.03211	1.01462	1.02177	1.07855	1.00346	0.970451	0.976227	1.04058	1.00599	1.00011	1.01755	1.0798	1.02368	1.03315	1.02716	1.02551	1.01608	0.987521	0.922682	S	1384	4	___1	Casein kinase II substrate motif;Cdc2 kinase substrate motif;CDK kinase substrate motif;CDK1,2,4,6 kinase substrate motif;ERK1,2 kinase substrate motif;G protein-coupled receptor kinase 1 substrate motif;GSK-3, ERK1, ERK2, CDK5 substrate motif;WW domain binding motif	+	CST;HTP	cell cycle;cell cycle process;cell division;cellular component organization;cellular component organization at cellular level;cellular component organization or biogenesis;cellular component organization or biogenesis at cellular level;cellular macromolecule metabolic process;cellular metabolic process;cellular nitrogen compound metabolic process;cellular process;chromosome condensation;chromosom…	binding;histone binding;methylated histone residue binding;protein binding	cell part;centromeric heterochromatin;chromatin;chromosomal part;condensin complex;female germ cell nucleus;germ cell nucleus;germinal vesicle;heterochromatin;intracellular membrane-bounded organelle;intracellular organelle;intracellular organelle part;intracellular part;macromolecular complex;membrane;membrane-bounded organelle;nuclear centromeric heterochromatin;nuclear chromatin;nuclear chromo…		Cellcycle;Celldivision;Coiledcoil;Completeproteome;DNAcondensation;Mitosis;Nucleus;Phosphoprotein;Polymorphism;Referenceproteome;Repeat	Condensin II			0.959747	6.48847e-16	174.78	105.33	112.82	-0.48615	228640000	0.518627	0.917912	0.208497	P42695
1.03645	1.04056	1.09229	1.02381	1.06095	1.02929	1.04111	1.01912	1.05782	0.988249	0.987372	0.97789	0.99292	1.02611	1.02551	0.989566	1.03603	1.01933	0.906821	0.938145	1.04505	1.10702	0.972632	0.984311	S	359	4	___1	14-3-3 domain binding motif;Calmodulin-dependent protein kinase II substrate motif;MAPKAPK2 kinase substrate motif;Phosphorylase kinase substrate motif;Pim1 kinase substrate sequence;PKA kinase substrate motif;PKC epsilon kinase substrate motif;PKC kinase substrate motif;ZIP kinase substrate motif	+	HTP;LTP	biological regulation;cAMP catabolic process;cAMP metabolic process;catabolic process;cellular catabolic process;cellular metabolic process;cellular nitrogen compound catabolic process;cellular nitrogen compound metabolic process;cellular process;cellular response to stimulus;cyclic nucleotide catabolic process;cyclic nucleotide metabolic process;heterocycle catabolic process;heterocycle metaboli…	3',5'-cyclic-AMP phosphodiesterase activity;3',5'-cyclic-nucleotide phosphodiesterase activity;binding;catalytic activity;cation binding;cyclic-nucleotide phosphodiesterase activity;hydrolase activity;hydrolase activity, acting on ester bonds;ion binding;metal ion binding;molecular transducer activity;phosphoric diester hydrolase activity;phosphoric ester hydrolase activity;signal transducer acti…	cell part;cytoplasmic part;cytosol;extracellular membrane-bounded organelle;extracellular organelle;extracellular region part;extracellular vesicular exosome;intracellular part;membrane-bounded organelle;membrane-bounded vesicle;organelle;vesicle	Purine metabolism	3D-structure;Alternativesplicing;cAMP;Completeproteome;Hydrolase;Metal-binding;Phosphoprotein;Polymorphism;Referenceproteome		PS00126;PS50112	PAS;PDEASE_I	1	0.0111551	63.624	25.321	55.721	-1.0062	88590000	0.14293	0.282364	0.21009	O60658
0.960544	1.00998	1.03604	1.01589	0.979853	1.01696	1.02541	0.988074	0.919285	0.972493	1.03897	1.01017	0.993896	0.95389	1.02918	1.02702	1.07139	1.02882	1.02154	0.873469	1.21773	1.01422	1.07939	1.03213	S	198	4	___1	ERK1,2 kinase substrate motif;G protein-coupled receptor kinase 1 substrate motif;GSK-3, ERK1, ERK2, CDK5 substrate motif;PKA kinase substrate motif;PKC kinase substrate motif;WW domain binding motif	+	HTP	autophagy;biological regulation;catabolic process;cell communication;cell cycle;cell cycle process;cell death;cellular catabolic process;cellular component organization;cellular component organization at cellular level;cellular component organization or biogenesis;cellular component organization or biogenesis at cellular level;cellular metabolic process;cellular process;cellular response to exter…	binding;enzyme binding;GTPase binding;identical protein binding;K63-linked polyubiquitin binding;polyubiquitin binding;protein binding;protein C-terminus binding;Rab GTPase binding;Ras GTPase binding;small conjugating protein binding;small GTPase binding;ubiquitin binding	autophagic vacuole;cell part;cytoplasm;cytoplasmic membrane-bounded vesicle;cytoplasmic part;cytoplasmic vesicle;cytosol;endosome;Golgi apparatus;Golgi apparatus part;Golgi membrane;intracellular membrane-bounded organelle;intracellular organelle;intracellular organelle part;intracellular part;membrane;membrane-bounded organelle;membrane-bounded vesicle;nuclear part;nucleoplasm;nucleus;organelle;…		3D-structure;Alternativesplicing;Amyotrophiclateralsclerosis;Autophagy;Coiledcoil;Completeproteome;Cytoplasm;Cytoplasmicvesicle;Diseasemutation;Endosome;Glaucoma;Golgiapparatus;Neurodegeneration;Phosphoprotein;Polymorphism;Referenceproteome	HD-RAB8A-OPTN complex			1	6.66906e-05	117.7	106.55	117.7	-0.0019228	5493500000	0.257723	0.201224	0.211339	Q96CV9
0.964693	1.0069	1.03418	1.00082	0.985805	1.0173	1.0169	0.992169	0.999955	0.999446	0.993417	0.984343	1.00597	0.9743	1.01046	1.00133	1.04215	1.02047	1.10493	0.921288	0.964505	0.908986	1.00292	0.96014	S	991	2	___1	ERK1,2 kinase substrate motif;G protein-coupled receptor kinase 1 substrate motif;GSK3 kinase substrate motif;GSK-3, ERK1, ERK2, CDK5 substrate motif;PKA kinase substrate motif;PKC kinase substrate motif;WW domain binding motif	+	CST;HTP	biological regulation;cellular component assembly;cellular component assembly at cellular level;cellular component organization;cellular component organization at cellular level;cellular component organization or biogenesis;cellular component organization or biogenesis at cellular level;cellular process;chromatin assembly;chromatin assembly or disassembly;chromatin modification;chromatin organiza…	binding;chromatin binding;DNA binding;nucleic acid binding;regulatory region DNA binding;regulatory region nucleic acid binding;sequence-specific DNA binding;transcription regulatory region DNA binding;transcription regulatory region sequence-specific DNA binding	cell part;chromatin;chromatin remodeling complex;chromatin silencing complex;chromosomal part;cytoplasm;cytoplasmic part;intracellular membrane-bounded organelle;intracellular organelle;intracellular organelle part;intracellular part;macromolecular complex;membrane;membrane-bounded organelle;mitochondrion;nuclear membrane;nuclear part;nucleoplasm;nucleus;organelle;organelle membrane;organelle par…		Alternativesplicing;Coiledcoil;Completeproteome;Isopeptidebond;Phosphoprotein;Polymorphism;Referenceproteome;Ublconjugation		PS51038	BAH	1	0.00143995	106.2	85.895	44.945	0.93671	61999000	0.925171	0.316007	0.211462	O15417
0.956881	1.01353	1.04275	0.968485	0.9625	0.98741	1.01913	0.949722	1.07054	0.994959	1.00606	1.01359	1.01469	0.986189	1.0026	1.01545	1.01258	1.05038	0.926384	1.00258	1.03508	1.17552	0.979746	1.04694	S	189	3	___1	Calmodulin-dependent protein kinase II substrate motif;Casein kinase II substrate motif;Chk1 kinase substrate motif;PKA kinase substrate motif;PKC kinase substrate motif	+	CST;HTP	biosynthetic process;catabolic process;cellular biosynthetic process;cellular catabolic process;cellular component disassembly;cellular component disassembly at cellular level;cellular component organization;cellular component organization at cellular level;cellular component organization or biogenesis;cellular component organization or biogenesis at cellular level;cellular macromolecular complex…	binding;nucleic acid binding;RNA binding;structural constituent of ribosome;structural molecule activity	adherens junction;anchoring junction;cell junction;cell part;cell-substrate adherens junction;cell-substrate junction;cytoplasm;cytoplasmic part;cytosol;cytosolic large ribosomal subunit;focal adhesion;intracellular non-membrane-bounded organelle;intracellular organelle;intracellular organelle part;intracellular part;large ribosomal subunit;macromolecular complex;membrane;non-membrane-bounded org…	Ribosome	3D-structure;Citrullination;Completeproteome;Directproteinsequencing;Phosphoprotein;Referenceproteome;Ribonucleoprotein;Ribosomalprotein	60S ribosomal subunit, cytoplasmic;Nop56p-associated pre-rRNA complex;Ribosome, cytoplasmic;TRBP containing complex (DICER, RPL7A, EIF6, MOV10 and subunits of the 60S ribosomal particle)	PS00526	RIBOSOMAL_L19E	0.982354	0.000102709	113.35	86.911	92.457	-0.038089	379420000	0.315279	0.743143	0.212287	P84098
0.972036	0.99736	1.00881	1.02923	1.01735	1.00911	1.00837	1.02665	1.03666	0.998975	0.973302	0.979705	1.03002	0.996305	0.998152	1.01443	1.07815	1.00307	1.09627	1.02036	1.07648	0.91516	1.0056	0.974006	S	359	3	___1	b-Adrenergic Receptor kinase substrate motif	+	HTP	biological regulation;cellular macromolecule metabolic process;cellular metabolic process;cellular process;cellular protein metabolic process;macromolecule metabolic process;metabolic process;negative regulation of catalytic activity;negative regulation of molecular function;positive regulation of biological process;positive regulation of catabolic process;positive regulation of cellular cataboli…	enzyme inhibitor activity;enzyme regulator activity		Protein processing in endoplasmic reticulum	3D-structure;Alternativesplicing;Completeproteome;Phosphoprotein;Polymorphism;Referenceproteome;Repeat				0.99992	1.04509e-09	136.96	114.91	86.371	-0.69223	205480000	0.443412	0.649516	0.212401	Q9NZL4
0.993113	1.01266	1.06557	1.01037	1.01098	1.03398	1.0538	0.947849	1.02677	0.996749	0.980252	1.02173	1.01114	0.996524	1.00657	1.03954	1.03726	1.03034	1.00963	0.927148	1.04709	1.07079	1.04911	0.978999	S	105	3	___1	Aurora-A kinase substrate motif;Casein kinase II substrate motif;PAK2 kinase substrate motif;Phosphorylase kinase substrate motif;PKA kinase substrate motif;PKC kinase substrate motif	+	HTP	acrosome reaction;biological regulation;calcium ion-dependent exocytosis;cellular process;cellular process involved in reproduction;establishment of localization;establishment of localization in cell;exocytosis;regulation of biological process;regulation of cell cycle;regulation of cellular process;reproductive process;secretion;secretion by cell;transport;vesicle-mediated transport	acid-amino acid ligase activity;binding;catalytic activity;cation binding;ion binding;ligase activity;ligase activity, forming carbon-nitrogen bonds;metal ion binding;small conjugating protein ligase activity;transition metal ion binding;ubiquitin-protein ligase activity;zinc ion binding	acrosomal vesicle;cell part;cytoplasmic membrane-bounded vesicle;cytoplasmic part;cytoplasmic vesicle;cytoskeleton;extracellular membrane-bounded organelle;extracellular organelle;extracellular region part;extracellular vesicular exosome;intracellular membrane-bounded organelle;intracellular non-membrane-bounded organelle;intracellular organelle;intracellular part;membrane-bounded organelle;membr…		Alternativesplicing;Coiledcoil;Completeproteome;Cytoplasm;Cytoplasmicvesicle;Cytoskeleton;Ligase;Metal-binding;Polymorphism;Referenceproteome;Repeat;Ublconjugationpathway;Zinc;Zinc-finger		PS00518;PS50089;PS50119;PS50188;PS50853;PS51262	B302_SPRY;COS;FN3;ZF_BBOX;ZF_RING_1;ZF_RING_2	0.999988	0.00442408	89.08	54.693	89.08	-0.15801	291620000	0.715484	0.306752	0.213227	Q9NQ86
0.991518	1.0101	1.01846	1.01062	1.03196	1.01627	1.01292	1.00356	1.00665	0.995498	0.983089	0.99324	0.997868	0.992791	0.999029	1.01382	1.02355	1.01566	1.06668	0.975556	0.99644	0.993103	1.00283	0.95935	S	786	2	___1	Cdc2 kinase substrate motif;CDK kinase substrate motif;CDK1,2,4,6 kinase substrate motif;ERK1,2 kinase substrate motif;G protein-coupled receptor kinase 1 substrate motif;GSK3 kinase substrate motif;GSK-3, ERK1, ERK2, CDK5 substrate motif;WW domain binding motif	+	CST;HTP	biological regulation;cellular macromolecule metabolic process;cellular metabolic process;cellular nitrogen compound metabolic process;cellular process;macromolecule metabolic process;metabolic process;ncRNA metabolic process;ncRNA processing;nitrogen compound metabolic process;nucleic acid metabolic process;nucleobase-containing compound metabolic process;positive regulation of biological proces…	catalytic activity;methyltransferase activity;S-adenosylmethionine-dependent methyltransferase activity;transferase activity;transferase activity, transferring one-carbon groups	cell part;intracellular non-membrane-bounded organelle;intracellular organelle;intracellular organelle part;intracellular part;non-membrane-bounded organelle;nuclear part;nucleolus;organelle;organelle part		Acetylation;Alternativesplicing;Citrullination;Completeproteome;Methyltransferase;Nucleus;Phosphoprotein;Polymorphism;Referenceproteome;RNA-binding;rRNAprocessing;S-adenosyl-L-methionine;Transferase		PS01153;PS51686	NOL1_NOP2_SUN;SAM_MT_RSMB_NOP	0.999994	8.73181e-22	189.99	156.84	135.5	-0.52799	2749300000	0.257896	0.790219	0.214432	P46087
0.931277	0.976858	1.0019	1.05474	0.991019	0.994004	0.997503	0.99203	1.03633	1.00009	0.965644	1.02722	1.03278	1.00404	0.979304	1.03386	1.03256	0.993247	0.958538	0.921024	1.12546	1.01826	1.00313	1.00016	S	578	3	___1	b-Adrenergic Receptor kinase substrate motif;Casein kinase II substrate motif	+	CST;HTP	actin cytoskeleton organization;actin filament-based process;cell communication;cell-cell signaling;cellular component organization;cellular component organization at cellular level;cellular component organization or biogenesis;cellular component organization or biogenesis at cellular level;cellular process;cortical actin cytoskeleton organization;cortical cytoskeleton organization;cytoskeleton o…	structural molecule activity	cell part;cytoplasmic part;cytoskeleton;cytosol;extrinsic to membrane;intracellular non-membrane-bounded organelle;intracellular organelle;intracellular part;membrane;membrane part;non-membrane-bounded organelle;organelle;plasma membrane	Tight junction	Acetylation;Actin-binding;Alternativesplicing;Completeproteome;Cytoplasm;Cytoskeleton;Diseasemutation;Mentalretardation;Phosphoprotein;Referenceproteome		PS00660;PS00661;PS50057	FERM_1;FERM_2;FERM_3	0.981097	8.61668e-62	272.38	246.25	166.89	-0.12851	87407000	0.664449	0.180781	0.21485	Q9H4G0
0.97134	1.01461	1.03713	1.00168	1.04196	1.05041	1.04063	0.988431	0.988989	0.967625	0.993445	1.04367	1.00761	0.962318	1.00308	1.04711	1.03904	1.04208	1.01259	0.972438	1.07853	1.09229	1.06392	1.03366	S	157	3	___1	14-3-3 domain binding motif;Calmodulin-dependent protein kinase II substrate motif;Calmodulin-dependent protein kinase IV substrate motif;Casein kinase II substrate motif;Chk1 kinase substrate motif;PKA kinase substrate motif;PKC kinase substrate motif;Pyruvate dehydrogenase kinase substrate motif	+	HTP	biological regulation;cell surface receptor linked signaling pathway;cellular process;cellular response to stimulus;enzyme linked receptor protein signaling pathway;insulin-like growth factor receptor signaling pathway;regulation of biological process;regulation of cellular process;response to stimulus;signal transduction;transmembrane receptor protein tyrosine kinase signaling pathway				Completeproteome;Phosphoprotein;Referenceproteome		PS50829	GYF	0.999828	0.000101735	120.32	92.791	98	-0.50729	203390000	0.04812	0.0421279	0.21758	O75420
0.968149	1.02167	1.05412	1.02598	0.993351	1.01809	1.03447	0.969375	1.04107	1.00012	1.01298	1.01066	1.01673	1.00035	1.02795	1.0226	1.07419	1.0559	0.886145	0.872056	1.09339	1.05384	1.00714	0.996352	S	372	4	___1	14-3-3 domain binding motif;Calmodulin-dependent protein kinase II substrate motif;G protein-coupled receptor kinase 1 substrate motif;PKA kinase substrate motif;PKC kinase substrate motif	+	HTP	activation of protein kinase activity;apoptosis;biological regulation;cell death;cellular macromolecule metabolic process;cellular metabolic process;cellular process;cellular protein metabolic process;cellular response to stimulus;cellular response to stress;death;intracellular protein kinase cascade;intracellular signal transduction;macromolecule metabolic process;macromolecule modification;meta…	adenyl nucleotide binding;adenyl ribonucleotide binding;ATP binding;binding;catalytic activity;identical protein binding;kinase activity;nucleotide binding;phosphotransferase activity, alcohol group as acceptor;protein binding;protein dimerization activity;protein homodimerization activity;protein kinase activity;protein serine/threonine kinase activity;purine nucleotide binding;purine ribonucleo…	cell part;cytoplasm;extracellular membrane-bounded organelle;extracellular organelle;extracellular region part;extracellular vesicular exosome;intracellular part;membrane-bounded organelle;membrane-bounded vesicle;organelle;vesicle	Oocyte meiosis	3D-structure;Alternativesplicing;Apoptosis;ATP-binding;Coiledcoil;Completeproteome;Cytoplasm;Kinase;Nucleotide-binding;Phosphoprotein;Polymorphism;Referenceproteome;Serine/threonine-proteinkinase;Transferase		PS00107;PS00108;PS50011;PS50151	PROTEIN_KINASE_ATP;PROTEIN_KINASE_DOM;PROTEIN_KINASE_ST;UVR	0.999805	6.49939e-10	158.98	138.04	149.52	-0.38388	2404100000	0.926975	0.379253	0.218265	Q9H2G2
1.0116	1.00557	1.02754	1.01721	1.05086	1.00626	1.01834	1.06952	0.994256	0.989141	0.994758	0.939199	1.00041	0.984816	1.01251	0.96132	1.01779	1.02901	1.05015	0.988735	1.00745	0.999328	0.996464	0.987145	S	284	3	___1	Casein kinase I substrate motif;ERK1,2 kinase substrate motif;G protein-coupled receptor kinase 1 substrate motif;Growth associated histone HI kinase substrate motif;GSK3 kinase substrate motif;GSK-3, ERK1, ERK2, CDK5 substrate motif;PKA kinase substrate motif;WW domain binding motif	+	CST;HTP	cell cycle;cellular component organization;cellular component organization at cellular level;cellular component organization or biogenesis;cellular component organization or biogenesis at cellular level;cellular macromolecule metabolic process;cellular metabolic process;cellular nitrogen compound metabolic process;cellular process;chromosome condensation;chromosome organization;DNA conformation c…		cell part;chromosome;intracellular non-membrane-bounded organelle;intracellular organelle;intracellular organelle part;intracellular part;membrane;non-membrane-bounded organelle;nuclear part;nucleoplasm;organelle;organelle part		Alternativesplicing;Chromosome;Completeproteome;DNAcondensation;Nucleus;Phosphoprotein;Referenceproteome	Condensin II			0.999003	5.55601e-15	180.93	152.3	180.93	0.13499	408200000	0.00564043	0.647239	0.218491	Q6IBW4
0.992314	1.01729	1.05247	1.01938	1.07569	1.02218	1.05408	1.05614	1.05753	1.01121	0.980893	0.960216	1.02732	1.021	1.00758	0.988965	1.10811	1.01164	1.13701	1.02527	1.05501	1.03306	1.0188	0.949215	S	276	2	___1	PKA kinase substrate motif;PKC kinase substrate motif	+	CST;HTP	anatomical structure development;bone development;developmental process		cell part;integral to membrane;intrinsic to membrane;membrane part		Alternativesplicing;Completeproteome;Membrane;Phosphoprotein;Polymorphism;Referenceproteome;Transmembrane;Transmembranehelix				0.9999	3.05039e-05	98.654	79.595	92.781	1.1563	56805000	0.0501398	0.915537	0.220565	Q7L4E1
0.987491	0.995074	1.00802	1.03254	1.01571	1.01785	1.00869	1.10875	0.947406	0.990054	0.994733	0.907951	0.978756	0.978491	0.996104	0.923355	1.05684	1.02146	1.07834	1.04326	1.04382	0.989931	1.02448	0.966021	S	308	2	___1	14-3-3 domain binding motif;b-Adrenergic Receptor kinase substrate motif;Calmodulin-dependent protein kinase II substrate motif;Calmodulin-dependent protein kinase IV substrate motif;Casein kinase II substrate motif;Chk1 kinase substrate motif;ERK1,2 kinase substrate motif;G protein-coupled receptor kinase 1 substrate motif;GSK-3, ERK1, ERK2, CDK5 substrate motif;PKA kinase substrate motif;PKC ki…	+	CST;HTP					Completeproteome;Directproteinsequencing;Phosphoprotein;Polymorphism;Referenceproteome				0.998836	7.02532e-28	193.06	174.76	158.01	1.1477	563570000	0.00138202	0.85782	0.222487	Q9BUA3
0.989463	0.997638	1.01152	1.02079	1.0147	1.0086	1.00603	1.00768	0.966971	0.981654	0.985146	1.02288	1.02222	0.962761	0.99864	1.04876	1.06055	1.02862	0.972558	0.952325	1.12695	1.03505	1.04362	1.01976	T	1949	3	___1	Casein kinase II substrate motif;Growth associated histone HI kinase substrate motif;GSK-3, ERK1, ERK2, CDK5 substrate motif;PKA kinase substrate motif;WW domain binding motif	+	CST;HTP	anatomical structure development;axon extension;biological regulation;cell growth;cell projection organization;cellular component movement;cellular component organization;cellular component organization at cellular level;cellular component organization or biogenesis;cellular component organization or biogenesis at cellular level;cellular process;cytoskeleton organization;cytoskeleton-dependent in…	structural molecule activity	cell junction;cell part;cell projection;cell projection part;cytoplasm;cytoplasmic part;cytoskeletal part;cytosol;dendritic spine;intracellular organelle part;intracellular part;macromolecular complex;membrane;microtubule;microtubule associated complex;neuron projection;neuron spine;organelle part;plasma membrane;postsynaptic density;protein complex;synapse part		Acetylation;Celljunction;Cellprojection;Completeproteome;Cytoplasm;Cytoskeleton;Directproteinsequencing;Microtubule;Phosphoprotein;Polymorphism;Referenceproteome;Repeat;S-nitrosylation;Synapse		PS00230	MAP1B_NEURAXIN	0.996854	1.39411e-33	230.75	192.02	227.32	-0.050296	1618200000	0.179003	0.0812839	0.222505	P46821
0.976285	0.995875	1.00784	1.02374	1.00226	1.00379	1.00491	1.00009	1.05593	1.00347	0.980714	0.994856	1.04241	1.00426	1.00486	1.0183	1.04374	1.02534	0.931047	1.0164	1.05776	1.13944	1.00729	1.01196	S	730	3	___2	14-3-3 domain binding motif;Akt kinase substrate motif;ATM kinase substrate motif;Calmodulin-dependent protein kinase II substrate motif;Casein kinase II substrate motif;DNA dependent Protein kinase substrate motif;MAPKAPK1 kinase substrate motif;PKA kinase substrate motif;PKC kinase substrate motif	+	CST;HTP	activation of JUN kinase activity;activation of MAPK activity;biological regulation;cell differentiation;cellular component assembly;cellular component organization;cellular component organization or biogenesis;cellular developmental process;cellular macromolecule metabolic process;cellular metabolic process;cellular process;cellular protein metabolic process;developmental process;endosome transp…	binding;binding, bridging;cytoskeletal protein binding;enzyme binding;JUN kinase binding;kinase binding;kinesin binding;MAP-kinase scaffold activity;protein binding;protein complex scaffold;protein kinase binding;receptor signaling complex scaffold activity;signaling adaptor activity;structural molecule activity	acrosomal vesicle;cell part;cytoplasm;cytoplasmic membrane-bounded vesicle;cytoplasmic part;cytoplasmic vesicle;cytosol;extracellular membrane-bounded organelle;extracellular organelle;extracellular region part;extracellular vesicular exosome;integral to membrane;intracellular membrane-bounded organelle;intracellular organelle;intracellular part;intrinsic to membrane;membrane part;membrane-bounde…		3D-structure;Acetylation;Alternativesplicing;Coiledcoil;Completeproteome;Cytoplasm;Cytoplasmicvesicle;Phosphoprotein;Polymorphism;Referenceproteome	CHUK-NFKB2-REL-IKBKG-SPAG9-NFKB1-NFKBIE-COPB2-TNIP1-NFKBIA-RELA-TNIP2 complex			0.988909	5.75559e-33	242.94	213.82	149.44	0.73215	3239000000	0.298297	0.171596	0.222571	O60271
1.10535	0.987667	1.01787	1.02437	1.18546	1.01794	1.03719	1.17109	1.00732	0.985195	0.949664	0.964779	0.978102	0.976841	0.976638	0.978619	1.0498	1.02462	1.05558	1.0053	1.05394	1.01521	1.01186	0.995615	T	287	2	___1	AMP-activated protein kinase substrate motif;b-Adrenergic Receptor kinase substrate motif;Calmodulin-dependent protein kinase I substrate motif;Calmodulin-dependent protein kinase II alpha substrate motif;Calmodulin-dependent protein kinase II substrate motif;Calmodulin-dependent protein kinase IV substrate motif;Chk1 kinase substrate motif;PKC kinase substrate motif	+	CST;HTP;LTP	anatomical structure development;biological regulation;calcium ion transport;cation transport;cell communication;cell cycle process;cell differentiation;cell surface receptor linked signaling pathway;cell-cell signaling;cellular component assembly;cellular component organization;cellular component organization or biogenesis;cellular developmental process;cellular macromolecule metabolic process;c…	adenyl nucleotide binding;adenyl ribonucleotide binding;ATP binding;binding;calcium-dependent protein serine/threonine phosphatase activity;calmodulin binding;calmodulin-dependent protein kinase activity;catalytic activity;hydrolase activity;hydrolase activity, acting on ester bonds;identical protein binding;kinase activity;nucleotide binding;phosphatase activity;phosphoprotein phosphatase activi…	cell part;cytoplasmic part;cytoplasmic vesicle membrane;cytoplasmic vesicle part;cytosol;endocytic vesicle membrane;endoplasmic reticulum membrane;endoplasmic reticulum part;intracellular organelle part;intracellular part;membrane;membrane part;nuclear part;nucleoplasm;organelle membrane;organelle part;plasma membrane;sarcoplasmic reticulum membrane;vesicle membrane	Calcium signaling pathway;ErbB signaling pathway;Gastric acid secretion;Glioma;GnRH signaling pathway;ko05152;Long-term potentiation;Melanogenesis;Neurotrophin signaling pathway;Olfactory transduction;Oocyte meiosis;Phototransduction - fly;Wnt signaling pathway	3D-structure;Alternativesplicing;ATP-binding;Calmodulin-binding;Completeproteome;Developmentalprotein;Differentiation;Kinase;Membrane;Neurogenesis;Nucleotide-binding;Phosphoprotein;Polymorphism;Referenceproteome;Sarcoplasmicreticulum;Serine/threonine-proteinkinase;Transferase		PS00107;PS00108;PS50011	PROTEIN_KINASE_ATP;PROTEIN_KINASE_DOM;PROTEIN_KINASE_ST	1	0.00924869	106.4	71.131	106.4	0.090717	36835000	0.0033539	0.26628	0.224076	Q13555
0.970697	1.00502	1.00775	1.01783	0.95852	1.01499	1.00761	0.982918	1.05047	0.993035	1.00167	1.03618	1.03239	0.987852	1.00609	1.05228	1.03004	1.01447	0.957111	1.04058	1.03962	1.11774	1.01673	1.01409	S	464	3	___1	14-3-3 domain binding motif;Calmodulin-dependent protein kinase I substrate motif;Calmodulin-dependent protein kinase II substrate motif;Calmodulin-dependent protein kinase IV substrate motif;Casein kinase II substrate motif;Chk1 kinase substrate motif;PKA kinase substrate motif;PKC kinase substrate motif	+	CST;HTP	biological regulation;cellular component organization;cellular component organization at cellular level;cellular component organization or biogenesis;cellular component organization or biogenesis at cellular level;cellular process;cytoskeleton organization;microtubule cytoskeleton organization;microtubule-based process;organelle organization;regulation of biological process;regulation of cellular…	binding;cytoskeletal protein binding;microtubule binding;microtubule minus-end binding;protein binding;tubulin binding	cell part;cytoplasm;intracellular part		Alternativesplicing;Completeproteome;Cytoplasm;Cytoskeleton;Microtubule;Phosphoprotein;Polymorphism;Referenceproteome		PS51508	CKK	0.986874	3.93649e-34	237.09	206.41	211.11	-0.60611	1251500000	0.122148	0.498948	0.22467	Q08AD1
0.978256	1.02771	1.00737	1.03296	1.01401	1.05042	0.988619	1.02426	1.01803	1.00163	0.968246	0.989478	1.00687	0.997463	1.00059	1.03333	1.05714	1.01292	1.06679	0.95679	1.02395	0.911333	0.999238	0.974563	S	656	3	___1	14-3-3 domain binding motif;Calmodulin-dependent protein kinase II substrate motif;ERK1,2 kinase substrate motif;G protein-coupled receptor kinase 1 substrate motif;GSK-3, ERK1, ERK2, CDK5 substrate motif;PKA kinase substrate motif;PKC kinase substrate motif;WW domain binding motif	+	HTP;LTP	autophagic vacuole assembly;autophagy;catabolic process;cellular catabolic process;cellular component assembly;cellular component assembly at cellular level;cellular component organization;cellular component organization at cellular level;cellular component organization or biogenesis;cellular component organization or biogenesis at cellular level;cellular localization;cellular macromolecule local…		autophagic vacuole;cell part;cytoplasmic part;cytoplasmic vesicle;endoplasmic reticulum membrane;endoplasmic reticulum part;endosomal part;endosome;endosome membrane;Golgi apparatus part;integral to membrane;intracellular membrane-bounded organelle;intracellular organelle;intracellular organelle part;intracellular part;intrinsic to membrane;late endosome;late endosome membrane;membrane;membrane p…		Acetylation;Alternativesplicing;Autophagy;Completeproteome;Cytoplasmicvesicle;Endoplasmicreticulum;Endosome;Glycoprotein;Golgiapparatus;Membrane;Phosphoprotein;Polymorphism;Proteintransport;Referenceproteome;Transmembrane;Transmembranehelix;Transport				0.960523	3.73423e-08	137.58	107.52	97.933	-0.29352	87928000	0.712143	0.723001	0.226227	Q7Z3C6
1.03664	0.997448	1.01838	0.972446	1.06619	1.01435	1.00555	0.970742	0.956873	0.991826	0.999732	0.999387	0.989629	0.966186	0.991939	1.01814	1.05811	1.01212	1.06046	1.04543	1.0276	0.971453	1.01719	1.01407	S	2009	3	___2	14-3-3 domain binding motif;Calmodulin-dependent protein kinase II alpha substrate motif;Calmodulin-dependent protein kinase II substrate motif;Calmodulin-dependent protein kinase IV substrate motif;Casein kinase II substrate motif;Chk1 kinase substrate motif;G protein-coupled receptor kinase 1 substrate motif;GSK3 kinase substrate motif;PAK2 kinase substrate motif;PKA kinase substrate motif;PKC …	+	CST;HTP	biological regulation;cellular component organization;cellular component organization at cellular level;cellular component organization or biogenesis;cellular component organization or biogenesis at cellular level;cellular macromolecule metabolic process;cellular metabolic process;cellular nitrogen compound metabolic process;cellular process;cytokinesis;cytoskeleton organization;macromolecule met…	binding;DNA binding;nucleic acid binding;RNA binding	cell part;intracellular organelle part;intracellular part;nuclear body;nuclear part;nuclear speck;nucleoplasm;nucleoplasm part;organelle part		Acetylation;Alternativesplicing;Cellcycle;Completeproteome;DNA-binding;mRNAprocessing;mRNAsplicing;Nucleus;Phosphoprotein;Polymorphism;Referenceproteome;Repeat;RNA-binding		PS50137;PS50174	DS_RBD;G_PATCH	0.999766	0.00639531	72.681	48.338	72.681	-0.037729	235600000	0.0477957	0.450239	0.227058	P18583
1.03664	0.997448	1.01838	0.972446	1.06619	1.01435	1.00555	0.970742	0.956873	0.991826	0.999732	0.999387	0.989629	0.966186	0.991939	1.01814	1.05811	1.01212	1.06046	1.04543	1.0276	0.971453	1.01719	1.01407	S	2013	2	___2	Cdc2 kinase substrate motif;CDK kinase substrate motif;CDK1,2,4,6 kinase substrate motif;ERK1,2 kinase substrate motif;GSK-3, ERK1, ERK2, CDK5 substrate motif;MAPKAPK2 kinase substrate motif;WW domain binding motif	+	CST;HTP	biological regulation;cellular component organization;cellular component organization at cellular level;cellular component organization or biogenesis;cellular component organization or biogenesis at cellular level;cellular macromolecule metabolic process;cellular metabolic process;cellular nitrogen compound metabolic process;cellular process;cytokinesis;cytoskeleton organization;macromolecule met…	binding;DNA binding;nucleic acid binding;RNA binding	cell part;intracellular organelle part;intracellular part;nuclear body;nuclear part;nuclear speck;nucleoplasm;nucleoplasm part;organelle part		Acetylation;Alternativesplicing;Cellcycle;Completeproteome;DNA-binding;mRNAprocessing;mRNAsplicing;Nucleus;Phosphoprotein;Polymorphism;Referenceproteome;Repeat;RNA-binding		PS50137;PS50174	DS_RBD;G_PATCH	0.999966	0.00143578	124.74	111.71	110.79	-0.90586	429580000	0.0477957	0.450239	0.227058	P18583
0.994026	0.996427	1.0112	1.02791	1.02458	1.01665	1.00234	1.00874	0.967226	0.975759	0.979798	1.01835	1.03313	0.966688	0.99864	1.04803	1.04839	1.01632	0.93022	0.944449	1.08923	1.01568	1.0509	1.00973	T	1932	3	___1	Casein kinase II substrate motif;Growth associated histone HI kinase substrate motif;GSK-3, ERK1, ERK2, CDK5 substrate motif;PKA kinase substrate motif;WW domain binding motif	+	CST;HTP	anatomical structure development;axon extension;biological regulation;cell growth;cell projection organization;cellular component movement;cellular component organization;cellular component organization at cellular level;cellular component organization or biogenesis;cellular component organization or biogenesis at cellular level;cellular process;cytoskeleton organization;cytoskeleton-dependent in…	structural molecule activity	cell junction;cell part;cell projection;cell projection part;cytoplasm;cytoplasmic part;cytoskeletal part;cytosol;dendritic spine;intracellular organelle part;intracellular part;macromolecular complex;membrane;microtubule;microtubule associated complex;neuron projection;neuron spine;organelle part;plasma membrane;postsynaptic density;protein complex;synapse part		Acetylation;Celljunction;Cellprojection;Completeproteome;Cytoplasm;Cytoskeleton;Directproteinsequencing;Microtubule;Phosphoprotein;Polymorphism;Referenceproteome;Repeat;S-nitrosylation;Synapse		PS00230	MAP1B_NEURAXIN	0.999993	9.49116e-39	247.22	197.99	113.01	0.90527	527700000	0.652602	0.0417301	0.228281	P46821
0.965909	1.01178	1.0121	1.00388	0.983906	0.998788	1.01483	0.985813	1.05649	0.989727	1.00835	1.01482	1.01884	0.978103	1.014	1.02455	1.04961	1.04937	0.948738	1.03611	1.08272	1.13009	1.00439	1.03098	S	315	3	___1	Casein kinase I substrate motif;Casein kinase II substrate motif;ERK1,2 kinase substrate motif;G protein-coupled receptor kinase 1 substrate motif;GSK-3, ERK1, ERK2, CDK5 substrate motif;Pyruvate dehydrogenase kinase substrate motif;WW domain binding motif	+	CST;HTP	biological regulation;cell surface receptor linked signaling pathway;cellular process;cellular response to stimulus;G-protein coupled receptor protein signaling pathway;opioid receptor signaling pathway;regulation of biological process;regulation of cell growth;regulation of cellular component organization;regulation of cellular process;regulation of growth;response to stimulus;signal transduction	binding;G-protein coupled receptor activity;molecular transducer activity;opioid receptor activity;peptide binding;peptide receptor activity;peptide receptor activity, G-protein coupled;receptor activity;signal transducer activity;signaling receptor activity;transmembrane signaling receptor activity	cell part;cytoplasm;intracellular membrane-bounded organelle;intracellular organelle;intracellular part;membrane;membrane-bounded organelle;nucleus;organelle		Acetylation;Alternativesplicing;Completeproteome;Cytoplasm;Growthregulation;Nucleus;Phosphoprotein;Polymorphism;Receptor;Referenceproteome;Repeat				1	1.4745e-26	187.21	175.16	187.21	-0.47011	1023100000	0.0633905	0.537215	0.228498	Q9NZT2
1.02795	1.08199	1.08204	1.05897	0.973273	1.07756	1.0406	0.957288	0.913477	0.939199	0.966023	1.01557	0.936755	0.972831	1.01405	1.06909	1.09093	1.04457	1.0915	0.831864	1.1221	1.11057	1.02119	1.02825	S	1364	3	___1	b-Adrenergic Receptor kinase substrate motif;Casein kinase I substrate motif;G protein-coupled receptor kinase 1 substrate motif;PKA kinase substrate motif;PKC kinase substrate motif	+	CST;HTP	biological regulation;biosynthetic process;cellular biosynthetic process;cellular component assembly;cellular component assembly at cellular level;cellular component organization;cellular component organization at cellular level;cellular component organization or biogenesis;cellular component organization or biogenesis at cellular level;cellular macromolecular complex assembly;cellular macromolec…	binding;nucleic acid binding;RNA binding;structural molecule activity;translation factor activity, nucleic acid binding;translation initiation factor activity	cell part;cytoplasm;cytoplasmic part;cytosol;eukaryotic 43S preinitiation complex;eukaryotic 48S preinitiation complex;eukaryotic translation initiation factor 3 complex;eukaryotic translation initiation factor 3 complex, eIF3m;intracellular membrane-bounded organelle;intracellular non-membrane-bounded organelle;intracellular organelle;intracellular organelle part;intracellular part;macromolecula…	RNA transport	3D-structure;Acetylation;Alternativesplicing;Coiledcoil;Completeproteome;Cytoplasm;Directproteinsequencing;Initiationfactor;Phosphoprotein;Polymorphism;Proteinbiosynthesis;Referenceproteome;Repeat	EIF3 complex (EIF3A, EIF3B, EIF3G, EIF3I, EIF3C);EIF3 complex (EIF3A, EIF3B, EIF3G, EIF3I, EIF3J);eIF3 complex (EIF3S6, EIF3S5, EIF3S4, EIF3S3, EIF3S6IP, EIF3S2, EIF3S9, EIF3S12, EIF3S10, EIF3S8, EIF3S1, EIF3S7);eIF3 complex (EIF3S6, EIF3S5, EIF3S4, EIF3S3, EIF3S6IP, EIF3S2, EIF3S9, EIF3S12, EIF3S10, EIF3S8, EIF3S1, EIF3S7, PCID1);EIF3 core complex (EIF3A, EIF3B, EIF3G, EIF3I)			1	0.0163118	74.424	36.833	55.064	-0.10903	403890000	0.140559	0.608973	0.22893	Q14152
0.959891	0.999988	0.959186	0.955283	0.993833	0.974624	0.947804	1.11734	1.02593	1.00885	0.979626	0.863223	1.00066	0.983538	1.01761	0.918281	1.07221	1.00753	1.16364	0.977797	1.05341	0.854749	1.00353	0.920946	S	227	3	___1	AMP-activated protein kinase substrate motif;ERK1,2 kinase substrate motif;GSK-3, ERK1, ERK2, CDK5 substrate motif;PKA kinase substrate motif;PKC kinase substrate motif;WW domain binding motif	+	CST;HTP	anatomical structure development;biological regulation;biosynthetic process;bone development;cellular biosynthetic process;cellular metabolic process;cellular nitrogen compound biosynthetic process;cellular nitrogen compound metabolic process;cellular process;developmental process;metabolic process;negative regulation of catalytic activity;negative regulation of molecular function;nitrogen compou…	binding;catalytic activity;cation binding;diphosphotransferase activity;enzyme inhibitor activity;enzyme regulator activity;ion binding;magnesium ion binding;metal ion binding;ribose phosphate diphosphokinase activity;transferase activity;transferase activity, transferring phosphorus-containing groups	macromolecular complex;protein complex;ribose phosphate diphosphokinase complex		3D-structure;Acetylation;Alternativesplicing;Completeproteome;Directproteinsequencing;Nucleotidebiosynthesis;Phosphoprotein;Referenceproteome				1	4.37527e-07	93.968	83.204	40.882	0.10418	73025000	0.471165	0.733879	0.230584	O60256
1.07509	0.965458	0.994198	1.05356	1.11137	1.0359	0.993847	1.12896	0.91021	0.963998	0.975545	0.92466	0.99078	0.976832	0.989334	0.979778	1.06869	0.987872	1.15517	1.00961	1.05036	0.964431	1.03233	0.950325	S	146	2	___1	MAPKAPK2 kinase substrate motif	+	CST;HTP					Acetylation;Completeproteome;Phosphoprotein;Polymorphism;Referenceproteome				0.99977	8.15899e-19	190.34	178.13	164.56	0.79782	1207000000	0.00969211	0.458596	0.231001	Q96AT1
0.957996	1.00511	1.01189	0.984503	0.991616	1.01254	1.0056	0.960705	0.925227	0.993752	0.999776	1.03343	0.983947	0.988728	0.996001	1.03688	1.03976	1.01478	1.01981	1.01847	1.01569	0.92523	1.00398	1.02633	S	1196	3	___1	Casein kinase I substrate motif;Casein kinase II substrate motif;Cdc2 kinase substrate motif;CDK kinase substrate motif;CDK1,2,4,6 kinase substrate motif;ERK1,2 kinase substrate motif;Growth associated histone HI kinase substrate motif;GSK-3, ERK1, ERK2, CDK5 substrate motif;MDC1 BRCT domain binding motif;Plk1 PBD domain binding motif;WW domain binding motif	+	HTP	alpha-beta T cell activation;alpha-beta T cell differentiation;anatomical structure development;biological regulation;biosynthetic process;CD4-positive, alpha-beta T cell activation;CD4-positive, alpha-beta T cell differentiation;CD4-positive, CD25-positive, alpha-beta regulatory T cell differentiation;cell activation;cell differentiation;cell surface receptor linked signaling pathway;cellular bi…	activating transcription factor binding;binding;chromatin binding;DNA binding;enzyme binding;enzyme regulator activity;histone deacetylase binding;histone deacetylase regulator activity;hormone receptor binding;nuclear hormone receptor binding;nucleic acid binding;nucleic acid binding transcription factor activity;protein binding;protein binding transcription factor activity;receptor binding;regu…	cell part;chromatin;chromosomal part;cytoplasm;cytoskeletal part;intracellular membrane-bounded organelle;intracellular organelle;intracellular organelle part;intracellular part;macromolecular complex;membrane;membrane-bounded organelle;microtubule;nuclear chromatin;nuclear chromosome part;nuclear part;nucleoplasm;nucleoplasm part;nucleus;organelle;organelle part;protein complex;spindle microtubu…		3D-structure;Acetylation;Alternativesplicing;Chromatinregulator;Coiledcoil;Completeproteome;DNA-binding;Nucleus;Phosphoprotein;Referenceproteome;Repeat;Repressor;Transcription;Transcriptionregulation;Ublconjugation	Kaiso-NCOR complex;NCOR complex;NCOR1 complex;NCOR2 complex;NCOR-HDAC3 complex;SKI-NCOR1-SIN3A-HDAC1 complex;SMAD2-SKI-NCOR complex;SMAD3-SKI-NCOR complex;SMAD4-SKI-NCOR complex	PS51293	SANT	0.921444	2.87181e-09	131.59	112.27	69.024	1.3407	817240000	0.669415	0.568337	0.234342	O75376
1.01573	1.00558	1.01973	1.02172	1.01398	1.0345	1.0188	1.07755	1.01278	1.00162	1.00206	0.981441	1.02223	1.01035	1.01036	0.986809	1.07842	1.03147	1.05971	1.00483	1.06795	0.995487	0.994438	0.972515	S	621	2	___1	Casein kinase II substrate motif;ERK1,2 kinase substrate motif;GSK-3, ERK1, ERK2, CDK5 substrate motif;WW domain binding motif	+	CST;HTP	cellular macromolecule metabolic process;cellular metabolic process;cellular process;cellular protein metabolic process;macromolecule metabolic process;macromolecule modification;metabolic process;primary metabolic process;protein acylation;protein lipidation;protein metabolic process;protein modification process;protein palmitoylation	binding;catalytic activity;cation binding;ion binding;metal ion binding;palmitoyltransferase activity;protein-cysteine S-acyltransferase activity;protein-cysteine S-palmitoleyltransferase activity;S-acyltransferase activity;transferase activity;transferase activity, transferring acyl groups;transferase activity, transferring acyl groups other than amino-acyl groups;transition metal ion binding;zi…	cell part;cell projection;dendrite;integral to membrane;intrinsic to membrane;membrane;membrane part;neuron projection;plasma membrane		Acyltransferase;Alternativesplicing;Cellmembrane;Completeproteome;Membrane;Metal-binding;Phosphoprotein;Referenceproteome;Transferase;Transmembrane;Transmembranehelix;Zinc;Zinc-finger		PS50216	ZF_DHHC	1	1.9123e-32	226.06	200.59	211.82	-0.34844	694580000	0.0776656	0.883664	0.235662	Q9C0B5
0.984314	0.997275	0.985206	1.03056	1.03931	0.96323	0.971439	1.00801	0.882003	0.991281	0.959856	0.855255	0.978936	0.926701	0.998318	1.05846	1.09855	0.995562	1.0861	0.954489	1.06846	0.947481	1.01633	0.824286	S	1462	4	___1	14-3-3 domain binding motif;b-Adrenergic Receptor kinase substrate motif;Calmodulin-dependent protein kinase II substrate motif;Calmodulin-dependent protein kinase IV substrate motif;Casein kinase II substrate motif;Chk1 kinase substrate motif;ERK1,2 kinase substrate motif;G protein-coupled receptor kinase 1 substrate motif;GSK-3, ERK1, ERK2, CDK5 substrate motif;PKA kinase substrate motif;PKC ki…	+	CST;HTP	biological regulation;biosynthetic process;cellular biosynthetic process;cellular macromolecule biosynthetic process;cellular macromolecule metabolic process;cellular metabolic process;cellular nitrogen compound metabolic process;cellular process;cellular response to stimulus;cellular response to stress;DNA metabolic process;DNA recombination;DNA repair;double-strand break repair;double-strand br…	activating transcription factor binding;binding;damaged DNA binding;DNA binding;histone binding;methylated histone residue binding;nucleic acid binding;p53 binding;protein binding;protein binding transcription factor activity;RNA polymerase II activating transcription factor binding;RNA polymerase II transcription cofactor activity;RNA polymerase II transcription factor binding;RNA polymerase II …	cell part;chromosomal part;condensed chromosome kinetochore;cytoplasm;intracellular membrane-bounded organelle;intracellular non-membrane-bounded organelle;intracellular organelle;intracellular organelle part;intracellular part;kinetochore;macromolecular complex;membrane-bounded organelle;non-membrane-bounded organelle;nuclear part;nucleoplasm;nucleus;organelle;organelle part;protein complex;repl…		3D-structure;Activator;Alternativesplicing;Centromere;Chromosomalrearrangement;Chromosome;Completeproteome;DNA-binding;DNAdamage;DNArepair;Kinetochore;Methylation;Nucleus;Phosphoprotein;Polymorphism;Referenceproteome;Repeat;Transcription;Transcriptionregulation	53BP1-containing complex;MDC1-H2AFX-TP53BP1 complex;MDC1-p53BP1-SMC1 complex;PTIP-DNA damage response complex	PS50172	BRCT	0.826469	2.70629e-33	188.97	170.25	105.42	0.040996	335130000	0.0723783	0.571456	0.235868	Q12888
0.991256	1.01789	1.03436	1.03892	1.03408	1.03131	1.03373	1.09623	1.02546	0.97496	0.979089	0.92946	1.0082	0.980929	1.01039	0.952177	1.07662	1.01845	1.08144	1.09041	1.07432	1.03631	1.00336	0.962343	S	53	3	___1	14-3-3 domain binding motif;Calmodulin-dependent protein kinase II substrate motif;Casein kinase II substrate motif;G protein-coupled receptor kinase 1 substrate motif;GSK3 kinase substrate motif;PKA kinase substrate motif;PKC kinase substrate motif;ZIP kinase substrate motif	+	CST;HTP	catabolic process;cellular catabolic process;cellular macromolecule catabolic process;cellular macromolecule metabolic process;cellular metabolic process;cellular nitrogen compound metabolic process;cellular process;gene expression;macromolecule catabolic process;macromolecule metabolic process;metabolic process;mRNA catabolic process;mRNA metabolic process;nitrogen compound metabolic process;nuc…	binding;identical protein binding;protein binding	cell part;cytoplasmic part;cytosol;intracellular;intracellular part		Acetylation;Alternativesplicing;Completeproteome;Nonsense-mediatedmRNAdecay;Phosphoprotein;Referenceproteome				0.99922	7.20696e-07	104.9	77.241	103.3	-0.43938	253970000	0.00105012	0.869278	0.236459	Q9H0W8
1.00905	1.00806	1.01667	0.994376	1.06335	1.02686	1.01534	1.00263	0.912879	0.981025	0.995535	0.981356	0.969376	0.970834	0.991878	0.97831	1.066	0.999003	1.10614	1.05203	1.06515	0.936716	1.03927	1.01553	S	115	2	___1	14-3-3 domain binding motif;Calmodulin-dependent protein kinase II substrate motif;Calmodulin-dependent protein kinase IV substrate motif;Casein kinase II substrate motif;PKA kinase substrate motif;PKC kinase substrate motif;Pyruvate dehydrogenase kinase substrate motif	+	CST;HTP	biological regulation;biosynthetic process;cellular biosynthetic process;cellular macromolecule biosynthetic process;cellular macromolecule metabolic process;cellular metabolic process;cellular nitrogen compound metabolic process;cellular process;gene expression;macromolecule biosynthetic process;macromolecule metabolic process;metabolic process;negative regulation of biological process;negative …	binding;nucleic acid binding;nucleotide binding;RNA binding	cell part;cytoplasmic part;intracellular membrane-bounded organelle;intracellular organelle;intracellular organelle part;intracellular part;macromolecular complex;membrane-bounded organelle;mitochondrion;NELF complex;nuclear part;nucleoplasm;nucleoplasm part;nucleus;organelle;organelle part;protein complex;transcription elongation factor complex		3D-structure;Alternativesplicing;Coiledcoil;Completeproteome;Directproteinsequencing;Nucleus;Phosphoprotein;Referenceproteome;Repeat;Repressor;RNA-binding;Transcription;Transcriptionregulation;Ublconjugation	NELF complex (Negative elongation factor complex)	PS50102	RRM	0.998871	1.6748e-86	343.27	315.97	343.27	0.34635	3058200000	0.0077943	0.75504	0.236466	P18615
0.993699	0.99139	1.02014	1.0322	1.04061	1.02816	1.01806	1.01098	0.965234	0.998433	0.984236	0.997888	0.99759	0.991136	0.998368	1.02314	1.025	1.01919	1.10719	0.917276	0.994897	0.906738	1.00359	0.947436	S	471	2	___1	elF2 alpha kinase substrate motif;ERK1,2 kinase substrate motif;Growth associated histone HI kinase substrate motif;GSK-3, ERK1, ERK2, CDK5 substrate motif;PKA kinase substrate motif;PKC kinase substrate motif;WW domain binding motif	+	CST;HTP	biological regulation;biosynthetic process;cellular biosynthetic process;cellular macromolecule biosynthetic process;cellular macromolecule metabolic process;cellular metabolic process;cellular nitrogen compound metabolic process;cellular process;cellular protein metabolic process;cellular response to stimulus;cellular response to stress;detection of stimulus;DNA biosynthetic process;DNA damage r…	ATPase activity;ATPase activity, coupled;binding;catalytic activity;cation binding;damaged DNA binding;DNA binding;DNA secondary structure binding;DNA-dependent ATPase activity;enzyme binding;hydrolase activity;hydrolase activity, acting on acid anhydrides;hydrolase activity, acting on acid anhydrides, in phosphorus-containing anhydrides;ion binding;ligase activity;metal ion binding;nucleic acid …	cell part;chromatin;chromosomal part;chromosome;intracellular membrane-bounded organelle;intracellular non-membrane-bounded organelle;intracellular organelle;intracellular organelle part;intracellular part;membrane-bounded organelle;non-membrane-bounded organelle;nuclear part;nucleoplasm;nucleus;organelle;organelle part;replication fork;sex chromosome;XY body		3D-structure;Acetylation;Completeproteome;DNA-binding;DNAdamage;DNArepair;Ligase;Metal-binding;Nucleus;Phosphoprotein;Polymorphism;Referenceproteome;Ublconjugationpathway;Zinc;Zinc-finger		PS00518;PS50089;PS50800	SAP;ZF_RING_1;ZF_RING_2	1	1.79515e-13	210.84	170.8	210.84	-0.18004	297600000	0.478199	0.853421	0.236638	Q9NS91
1.04186	1.01324	1.02391	1.00321	1.09696	1.03199	1.01535	1.08463	0.957984	0.973553	1.00944	0.933061	1.0125	0.961581	1.00587	0.953901	0.993673	1.02403	1.09672	0.97876	0.967231	1.01182	1.00969	0.956001	S	153	4	___1	Cdc2 kinase substrate motif;CDK kinase substrate motif;CDK1,2,4,6 kinase substrate motif;ERK1,2 kinase substrate motif;Growth associated histone HI kinase substrate motif;GSK-3, ERK1, ERK2, CDK5 substrate motif;PKA kinase substrate motif;PKC kinase substrate motif;WW domain binding motif	+	CST;HTP	biological regulation;biosynthetic process;cellular biosynthetic process;cellular macromolecule biosynthetic process;cellular macromolecule metabolic process;cellular metabolic process;cellular nitrogen compound metabolic process;cellular process;macromolecule biosynthetic process;macromolecule metabolic process;metabolic process;nitrogen compound metabolic process;nucleic acid metabolic process;…		cell part;extracellular region part;extracellular space;intracellular non-membrane-bounded organelle;intracellular organelle;intracellular organelle part;intracellular part;non-membrane-bounded organelle;nuclear part;nucleolus;nucleoplasm;organelle;organelle part		Acetylation;Coiledcoil;Completeproteome;Nucleus;Phosphoprotein;Polymorphism;Referenceproteome;Transcription;Transcriptionregulation				0.999947	0.000160168	129.28	19.403	92.112	0.37549	2453100000	0.00801503	0.517476	0.238187	Q9H501
1.04877	0.989438	1.03759	1.05088	1.09496	1.01215	1.02633	1.10534	0.998923	0.999921	0.974549	0.962703	0.990593	1.0066	1.0062	0.97735	1.08032	1.00571	1.03031	1.05201	1.06068	0.983741	0.993622	0.983352	S	666	2	___1	ERK1,2 kinase substrate motif;G protein-coupled receptor kinase 1 substrate motif;Growth associated histone HI kinase substrate motif;GSK3 kinase substrate motif;GSK-3, ERK1, ERK2, CDK5 substrate motif;PKA kinase substrate motif;PKC kinase substrate motif;WW domain binding motif	+	CST;HTP;LTP	biological regulation;biosynthetic process;cell cycle;cellular biosynthetic process;cellular component organization;cellular component organization at cellular level;cellular component organization or biogenesis;cellular component organization or biogenesis at cellular level;cellular macromolecule biosynthetic process;cellular macromolecule metabolic process;cellular metabolic process;cellular ni…	binding;chromatin binding;enzyme binding;protein binding;protein dimerization activity;protein heterodimerization activity	cell part;DSIF complex;intracellular membrane-bounded organelle;intracellular organelle;intracellular organelle part;intracellular part;macromolecular complex;membrane-bounded organelle;nuclear part;nucleoplasm;nucleoplasm part;nucleus;organelle;organelle part;protein complex;transcription elongation factor complex		3D-structure;Acetylation;Activator;Alternativesplicing;Completeproteome;Directproteinsequencing;Methylation;Nucleus;Phosphoprotein;Referenceproteome;Repeat;Repressor;Transcription;Transcriptionregulation	DSIF complex (DRB sensitivity-inducing factor complex);RNA pol II containing coactivator complex Tat-SF;Transcription elongation factor complex (SUPT5H, CDK9, CCNT1)			0.999999	1.02078e-09	127.5	102.18	102.05	0.031835	643170000	0.00796215	0.758887	0.239627	O00267
0.95885	1.00266	1.01732	1.01958	0.994066	1.03716	1.01206	0.986201	1.0014	0.985093	0.975761	0.954812	1.00309	0.989399	1.00034	0.998239	1.07161	1.00175	1.04828	0.992609	1.05417	0.949028	0.980497	0.980137	S	419	3	___1	ERK1,2 kinase substrate motif;GSK-3, ERK1, ERK2, CDK5 substrate motif;MAPKAPK2 kinase substrate motif;WW domain binding motif	+	CST;HTP	cellular macromolecule metabolic process;cellular metabolic process;cellular nitrogen compound metabolic process;cellular process;cellular protein metabolic process;macromolecule metabolic process;macromolecule modification;metabolic process;ncRNA metabolic process;ncRNA processing;nitrogen compound metabolic process;nucleic acid metabolic process;nucleobase-containing compound metabolic process;…	binding;catalytic activity;nucleic acid binding;nucleotidyltransferase activity;RNA binding;transferase activity;transferase activity, transferring phosphorus-containing groups;tRNA binding	cell part;cytoplasm;cytoplasmic part;intracellular membrane-bounded organelle;intracellular organelle;intracellular part;macromolecular complex;membrane-bounded organelle;mitochondrion;organelle;protein complex	Sulfur relay system	Acetylation;Alternativesplicing;Completeproteome;Cytoplasm;Phosphoprotein;Polymorphism;Referenceproteome;tRNAprocessing				0.999867	3.09869e-07	114.33	83.423	88.781	-0.27392	144650000	0.278497	0.869163	0.239703	Q2VPK5
0.934458	0.996869	1.00685	1.02971	0.975806	0.990614	1.00973	0.958961	1.21553	1.00212	0.950292	1.03295	1.09528	1.01422	0.991299	1.06569	1.0293	1.009	0.887012	0.958411	1.02815	1.22228	0.996884	0.986112	S	519	4	___1	Casein kinase I substrate motif	+	CST;HTP	cellular macromolecule metabolic process;cellular metabolic process;cellular nitrogen compound metabolic process;cellular process;macromolecule metabolic process;macromolecule modification;metabolic process;ncRNA metabolic process;ncRNA processing;nitrogen compound metabolic process;nucleic acid metabolic process;nucleobase-containing compound metabolic process;primary metabolic process;RNA metab…	binding;nucleic acid binding;RNA binding;snoRNA binding	box C/D snoRNP complex;cell part;cytoplasm;intracellular non-membrane-bounded organelle;intracellular organelle;intracellular organelle part;intracellular part;macromolecular complex;membrane;non-membrane-bounded organelle;nuclear part;nucleolar part;nucleolus;nucleoplasm;organelle;organelle part;preribosome;pre-snoRNP complex;ribonucleoprotein complex;small nucleolar ribonucleoprotein complex;sm…	Ribosome biogenesis in eukaryotes	Acetylation;Completeproteome;Cytoplasm;Directproteinsequencing;Neurodegeneration;Nucleus;Phosphoprotein;Polymorphism;Referenceproteome;Ribonucleoprotein;Ribosomebiogenesis;Spinocerebellarataxia	Nop56p-associated pre-rRNA complex	PS51358	NOP	0.996994	2.60077e-20	172.32	151.5	93.411	-1.0153	479090000	0.323084	0.392922	0.241503	O00567
1.05286	1.02224	1.03582	1.05645	1.06672	1.07284	1.05097	0.987359	1.01925	1.02948	0.973424	1.06561	1.00587	1.02856	1.01496	1.07178	1.04156	1.02365	1.07014	1.03613	1.01399	0.992524	1.00319	0.998334	S	379	3	___1	14-3-3 domain binding motif;Calmodulin-dependent protein kinase II alpha substrate motif;Calmodulin-dependent protein kinase II substrate motif;Calmodulin-dependent protein kinase IV substrate motif;Phosphorylase kinase substrate motif;PKA kinase substrate motif;PKC kinase substrate motif	+	CST;HTP	axon ensheathment;biological regulation;cell cycle process;cellular component assembly;cellular component assembly at cellular level;cellular component organization;cellular component organization at cellular level;cellular component organization or biogenesis;cellular component organization or biogenesis at cellular level;cellular process;centrosome duplication;centrosome organization;cytoskelet…	binding;cytoskeletal protein binding;enzyme regulator activity;GTPase regulator activity;guanyl-nucleotide exchange factor activity;kinesin binding;nucleoside-triphosphatase regulator activity;protein binding;Ras guanyl-nucleotide exchange factor activity;Rho guanyl-nucleotide exchange factor activity;small GTPase regulator activity	cell part;centrosome;cytoplasmic part;cytoskeletal part;cytosol;intracellular non-membrane-bounded organelle;intracellular organelle;intracellular organelle part;intracellular part;microtubule organizing center;non-membrane-bounded organelle;organelle;organelle part		Alternativesplicing;Coiledcoil;Completeproteome;Diseasemutation;Guanine-nucleotidereleasingfactor;Phosphoprotein;Polymorphism;Referenceproteome		PS50010	DH_2	1	0.000318317	95.483	70.629	60.342	-0.45095	325970000	0.403817	0.53519	0.241586	O15013
1.00727	0.984488	1.00981	1.06705	1.01071	1.04592	1.0027	1.05029	0.888388	0.976742	0.978788	0.897815	0.988306	0.963353	0.991562	1.07286	1.08478	0.995508	1.09906	0.913517	1.06474	0.846819	1.0182	0.965879	S	1480	3	___1	14-3-3 domain binding motif;Akt kinase substrate motif;Calmodulin-dependent protein kinase II substrate motif;Casein kinase II substrate motif;MAPKAPK1 kinase substrate motif;p70 Ribosomal S6 kinase substrate motif;Phosphorylase kinase substrate motif;PKA kinase substrate motif;PKC kinase substrate motif	+	CST;HTP	biological regulation;biosynthetic process;canonical Wnt receptor signaling pathway;cell differentiation;cell surface receptor linked signaling pathway;cellular biosynthetic process;cellular developmental process;cellular macromolecule biosynthetic process;cellular macromolecule metabolic process;cellular metabolic process;cellular nitrogen compound metabolic process;cellular process;cellular res…	beta-catenin binding;binding;protein binding;protein binding transcription factor activity;transcription coactivator activity;transcription cofactor activity;transcription factor binding transcription factor activity	cell part;intracellular membrane-bounded organelle;intracellular non-membrane-bounded organelle;intracellular organelle;intracellular organelle part;intracellular part;membrane-bounded organelle;non-membrane-bounded organelle;nuclear part;nucleolus;nucleoplasm;nucleus;organelle;organelle part		3D-structure;Acetylation;Activator;Alternativesplicing;Completeproteome;Nucleus;Phosphoprotein;Referenceproteome;Transcription;Transcriptionregulation				0.83697	1.54604e-07	106.1	97.053	88.571	0.12665	504930000	0.27143	0.626304	0.244271	Q86UU0
0.971313	0.981432	0.995746	1.04708	1.0145	1.01269	0.975623	0.98881	1.06772	1.02151	0.958273	0.981302	1.02645	1.02718	0.998895	1.03669	1.07728	0.999612	1.03639	1.02995	1.05155	0.935386	0.974434	1.0026	S	173	2	___1	ERK1,2 kinase substrate motif;GSK-3, ERK1, ERK2, CDK5 substrate motif;WW domain binding motif	+	CST;HTP	cellular macromolecule metabolic process;cellular metabolic process;cellular nitrogen compound metabolic process;cellular process;gene expression;macromolecule metabolic process;metabolic process;mRNA metabolic process;mRNA processing;nitrogen compound metabolic process;nuclear mRNA splicing, via spliceosome;nucleic acid metabolic process;nucleobase-containing compound metabolic process;primary m…	binding;DNA binding;nucleic acid binding;RNA binding;single-stranded DNA binding;structure-specific DNA binding	cell part;cytoplasm;extracellular membrane-bounded organelle;extracellular organelle;extracellular region part;extracellular vesicular exosome;intracellular membrane-bounded organelle;intracellular organelle;intracellular organelle part;intracellular part;macromolecular complex;membrane;membrane-bounded organelle;membrane-bounded vesicle;nuclear part;nucleoplasm;organelle;organelle part;ribonucle…	Spliceosome	3D-structure;Acetylation;Completeproteome;Cytoplasm;Directproteinsequencing;DNA-binding;Nucleus;Phosphoprotein;Referenceproteome;Repeat;Ribonucleoprotein;RNA-binding		PS50084	KH_TYPE_1	0.999986	2.05357e-92	342.9	320.05	342.9	-0.41245	1317700000	0.593024	0.511376	0.245997	Q15365
0.959476	1.02517	1.03379	1.02939	1.02055	1.04367	1.00675	1.00934	1.13346	1.00762	0.959932	1.00429	1.06638	1.02828	1.00337	1.05829	1.10791	1.02086	1.06199	1.06146	1.06758	0.961861	0.977828	0.998384	T	557	4	___1	Casein kinase II substrate motif;G protein-coupled receptor kinase 1 substrate motif	+	HTP	activation of JUN kinase activity;activation of MAPK activity;ameboidal cell migration;biological regulation;biosynthetic process;cell migration;cell motility;cellular biosynthetic process;cellular component movement;cellular component organization;cellular component organization at cellular level;cellular component organization or biogenesis;cellular component organization or biogenesis at cellu…	adenyl nucleotide binding;adenyl ribonucleotide binding;androgen receptor binding;ATP binding;binding;catalytic activity;chromatin binding;enzyme binding;GTPase binding;GTP-Rho binding;histone binding;histone deacetylase binding;histone kinase activity;histone kinase activity (H3-T11 specific);histone threonine kinase activity;hormone receptor binding;kinase activity;kinase binding;ligand-depende…	cell division site part;cell part;cleavage furrow;cytoplasm;cytoplasmic membrane-bounded vesicle;cytoplasmic part;cytoplasmic vesicle;cytosol;endosome;intracellular membrane-bounded organelle;intracellular organelle;intracellular organelle part;intracellular part;membrane;membrane-bounded organelle;membrane-bounded vesicle;midbody;nuclear part;nucleoplasm;nucleus;organelle;organelle part;plasma m…		3D-structure;Acetylation;Alternativesplicing;ATP-binding;Cellmembrane;Chromatinregulator;Completeproteome;Cytoplasm;Endosome;Kinase;Membrane;Nucleotide-binding;Nucleus;Phosphoprotein;Polymorphism;Referenceproteome;Repeat;Serine/threonine-proteinkinase;Transcription;Transcriptionregulation;Transferase;Ublconjugation		PS00107;PS00108;PS50011;PS51285	AGC_KINASE_CTER;PROTEIN_KINASE_ATP;PROTEIN_KINASE_DOM;PROTEIN_KINASE_ST	0.973733	0.00112844	65.472	49.932	65.472	0.31776	45682000	0.630417	0.542828	0.247218	Q16512
0.966529	1.01432	1.03365	0.994431	1.00861	1.02645	1.02253	0.980503	0.919576	0.984859	0.999032	1.02728	0.962284	0.963976	1.00477	1.03426	1.06369	1.00585	1.03618	1.17657	1.06896	0.918281	1.0126	1.21023	S	496	2	___1	ERK1,2 kinase substrate motif;GSK-3, ERK1, ERK2, CDK5 substrate motif;PKA kinase substrate motif;PKC kinase substrate motif;WW domain binding motif	+	HTP	anatomical structure development;biological regulation;biosynthetic process;cellular biosynthetic process;cellular macromolecule biosynthetic process;cellular macromolecule metabolic process;cellular metabolic process;cellular nitrogen compound metabolic process;cellular process;developmental process;lung alveolus development;macromolecule biosynthetic process;macromolecule metabolic process;meta…	binding;chromatin binding;DNA binding;nucleic acid binding	cell part;intracellular membrane-bounded organelle;intracellular organelle;intracellular part;membrane-bounded organelle;nucleus;organelle		3D-structure;Acetylation;Completeproteome;DNA-binding;Nucleus;Phosphoprotein;Polymorphism;Referenceproteome;Repressor;Transcription;Transcriptionregulation		PS50118	HMG_BOX_2	1	0.000946783	104.79	70.074	84.368	0.79958	85994000	0.142368	0.391807	0.248236	Q96RK0
1.03006	0.989952	1.03136	1.09993	1.08307	1.02389	1.029	1.19031	0.993139	1.02757	0.964262	0.885729	0.99488	0.988198	0.997316	0.907851	1.07291	0.991651	1.08136	1.07352	1.0562	0.972803	0.970915	0.961128	S	78	2	___1	Casein kinase II substrate motif	+	CST;HTP	anatomical structure morphogenesis;astral microtubule organization;biological regulation;cation transport;cell cycle process;cell morphogenesis;cell morphogenesis involved in differentiation;cell projection organization;cellular component assembly;cellular component assembly at cellular level;cellular component morphogenesis;cellular component organization;cellular component organization at cellu…	binding;catalytic activity;cytoskeletal protein binding;GDP binding;GTP binding;GTPase activity;guanyl nucleotide binding;guanyl ribonucleotide binding;hydrolase activity;hydrolase activity, acting on acid anhydrides;hydrolase activity, acting on acid anhydrides, in phosphorus-containing anhydrides;microtubule binding;myosin binding;myosin V binding;nucleoside-triphosphatase activity;nucleotide b…	axon;cell division site part;cell junction;cell part;cell projection;cell projection membrane;cell projection part;clathrin coated vesicle membrane;clathrin-coated vesicle;cleavage furrow;coated vesicle;coated vesicle membrane;cytoplasmic membrane-bounded vesicle;cytoplasmic part;cytoplasmic vesicle;cytoplasmic vesicle membrane;cytoplasmic vesicle part;cytoskeletal part;cytosol;endocytic vesicle;…	Endocrine and other factor-regulated calcium reabsorption;Endocytosis;Pancreatic secretion;Vasopressin-regulated water reabsorption	3D-structure;Acetylation;Alternativesplicing;Cellcycle;Celljunction;Cellmembrane;Cellprojection;Citrullination;Completeproteome;Cytoplasmicvesicle;Directproteinsequencing;Endosome;GTP-binding;Lipoprotein;Membrane;Methylation;Nucleotide-binding;Prenylation;Proteintransport;Referenceproteome;Synapse;Transport	RCP-Rab11 complex	PS51419	RAB	0.998186	0.000746674	142.04	122.69	142.04	-1.0164	37610000	0.0133395	0.978379	0.248672	P62491;Q15907;P57735
0.923792	1.01841	1.03867	1.05042	0.955903	1.04955	1.02383	0.976519	1.08449	1.01473	0.992942	1.05864	1.05115	1.03794	1.01827	1.09363	1.06382	1.06553	0.84739	0.984966	1.1396	1.09597	1.02671	1.01064	S	844	2	___1	14-3-3 domain binding motif;Calmodulin-dependent protein kinase II substrate motif;Casein kinase II substrate motif;Phosphorylase kinase substrate motif;PKA kinase substrate motif;PKC kinase substrate motif;Pyruvate dehydrogenase kinase substrate motif	+	HTP	biological regulation;cellular component organization;cellular component organization at cellular level;cellular component organization or biogenesis;cellular component organization or biogenesis at cellular level;cellular process;cytoskeleton organization;microtubule cytoskeleton organization;microtubule-based process;organelle organization;regulation of biological process;regulation of cellular…	binding;cytoskeletal protein binding;microtubule binding;microtubule minus-end binding;protein binding;tubulin binding	cell part;cytoplasm;intracellular part		Alternativesplicing;Completeproteome;Cytoplasm;Cytoskeleton;Microtubule;Phosphoprotein;Polymorphism;Referenceproteome		PS51508	CKK	0.983866	0.00421537	87.667	28.241	87.667	-0.49178	1033600000	0.427807	0.239258	0.248715	Q08AD1
0.952107	1.02715	1.0654	1.02214	0.968389	1.00673	1.04073	0.970453	0.981134	0.98925	1.01875	1.02921	0.987684	0.984781	1.02459	1.0371	1.04555	1.04759	0.977588	0.81694	1.14029	1.00718	1.01868	0.997613	S	71	3	___1	Casein kinase II substrate motif;G protein-coupled receptor kinase 1 substrate motif;MAPKAPK2 kinase substrate motif	+	HTP	biological regulation;cellular macromolecule metabolic process;cellular metabolic process;cellular nitrogen compound metabolic process;cellular process;cellular response to biotic stimulus;cellular response to chemical stimulus;cellular response to cytokine stimulus;cellular response to interleukin-1;cellular response to lipopolysaccharide;cellular response to molecule of bacterial origin;cellula…		catalytic step 2 spliceosome;cell part;cytoplasm;extracellular membrane-bounded organelle;extracellular organelle;extracellular region part;extracellular vesicular exosome;intracellular membrane-bounded organelle;intracellular organelle;intracellular organelle part;intracellular part;macromolecular complex;membrane-bounded organelle;membrane-bounded vesicle;nuclear part;nucleoplasm;nucleus;organe…		Alternativesplicing;Coiledcoil;Completeproteome;Developmentalprotein;Immunity;Innateimmunity;mRNAprocessing;mRNAsplicing;Nucleus;Phosphoprotein;Referenceproteome;Spliceosome	C complex spliceosome;Spliceosome			0.986962	0.00471338	71.451	46.528	61.593	-0.30456	1975000000	0.999179	0.448554	0.249221	Q8WUQ7
0.982936	1.01376	1.02211	1.00086	1.00991	1.01146	1.02087	1.01361	1.03087	0.993691	1.00389	0.973739	1.01193	0.978206	1.01121	0.984583	1.05203	1.02942	1.03042	1.00073	1.07548	1.04949	1.043	1.02287	S	350	3	___1	ERK1,2 kinase substrate motif;G protein-coupled receptor kinase 1 substrate motif;GSK-3, ERK1, ERK2, CDK5 substrate motif;WW domain binding motif	+	HTP	apoptosis;cell death;cellular process;death;localization;macromolecule localization;programmed cell death;protein localization		adherens junction;anchoring junction;cell junction;cell part;cell-substrate adherens junction;cell-substrate junction;cytoplasm;cytoskeleton;focal adhesion;intracellular non-membrane-bounded organelle;intracellular organelle;intracellular part;non-membrane-bounded organelle;organelle		Actin-binding;Apoptosis;Celljunction;Completeproteome;Cytoplasm;Cytoskeleton;Phosphoprotein;Polymorphism;Referenceproteome;SH2domain;Signal		PS50001	SH2	0.999787	0.00054781	94.767	67.981	89.805	-1.0011	1067600000	0.00104303	0.309227	0.249852	Q8IZW8
0.96851	1.00611	1.03522	0.984072	0.987602	1.00542	1.03256	0.970701	0.996359	0.978366	0.997015	0.984637	1.02187	0.956185	0.991301	0.986244	1.07305	1.06564	0.943171	1.016	1.11154	1.10545	1.02695	0.970051	S	58	2	___2	Casein kinase II substrate motif;Cdc2 kinase substrate motif;CDK kinase substrate motif;CDK1,2,4,6 kinase substrate motif;ERK1,2 kinase substrate motif;G protein-coupled receptor kinase 1 substrate motif;GSK-3, ERK1, ERK2, CDK5 substrate motif;WW domain binding motif	+	CST;HTP	viral reproduction		cell part;intracellular membrane-bounded organelle;intracellular non-membrane-bounded organelle;intracellular organelle;intracellular organelle part;intracellular part;membrane-bounded organelle;non-membrane-bounded organelle;nuclear part;nucleolus;nucleoplasm;nucleus;organelle;organelle part		Alternativesplicing;Citrullination;Coiledcoil;Completeproteome;Host-virusinteraction;Nucleus;Phosphoprotein;Polymorphism;Referenceproteome				1	3.5343e-06	129.74	89.639	124.39	-0.47323	13925000000	0.0122371	0.37366	0.251127	Q9H6F5
0.979614	1.0032	1.01463	1.03295	0.996381	1.02196	1.02171	1.00941	1.01482	0.967359	0.96545	1.07298	1.0099	0.972693	0.984409	1.07108	1.06525	0.995401	0.970095	1.0482	1.13521	1.07845	1.0427	1.02288	S	648	3	___1	14-3-3 domain binding motif;Calmodulin-dependent protein kinase II substrate motif;G protein-coupled receptor kinase 1 substrate motif;GSK3 kinase substrate motif;MAPKAPK2 kinase substrate motif;Phosphorylase kinase substrate motif;PKA kinase substrate motif;PKC epsilon kinase substrate motif;PKC kinase substrate motif	+	HTP	cell migration;cell motility;cellular component movement;cellular component organization;cellular component organization at cellular level;cellular component organization or biogenesis;cellular component organization or biogenesis at cellular level;cellular process;cytoskeleton organization;locomotion;microtubule bundle formation;microtubule cytoskeleton organization;microtubule-based process;neu…		cell part;cytoplasm;cytoskeletal part;intracellular organelle part;intracellular part;macromolecular complex;microtubule;organelle part;protein complex		Acetylation;Alternativesplicing;Coiledcoil;Completeproteome;Cytoplasm;Cytoskeleton;Developmentalprotein;Differentiation;Microtubule;Neurogenesis;Phosphoprotein;Polymorphism;Referenceproteome				0.978088	2.50616e-19	167.67	157.53	164.83	-0.21823	137640000	0.112708	0.225079	0.251489	Q8NEY1
0.963875	1.00982	1.02809	1.00067	1.01015	1.02845	1.02093	0.9788	1.05163	0.974367	0.979164	1.01899	1.02332	0.97957	0.985882	1.03636	1.05505	1.01144	0.942564	1.00999	1.08058	1.08727	1.01776	1.00427	S	349	3	___1	Casein kinase II substrate motif	+	CST;HTP	adherens junction organization;anatomical structure development;biological adhesion;biological regulation;biosynthetic process;brain development;cell adhesion;cell junction assembly;cell junction organization;cell surface receptor linked signaling pathway;cell-cell adhesion;cell-cell junction organization;cellular biosynthetic process;cellular component assembly;cellular component assembly at cel…	binding;cadherin binding;cell adhesion molecule binding;protein binding;receptor binding	adherens junction;anchoring junction;cell junction;cell part;cell projection;cell projection part;cell-cell adherens junction;cell-cell junction;cytoplasm;cytoplasmic part;cytosol;dendritic spine;extracellular membrane-bounded organelle;extracellular organelle;extracellular region part;extracellular vesicular exosome;growth cone;intracellular membrane-bounded organelle;intracellular organelle;int…	Adherens junction;Leukocyte transendothelial migration	3D-structure;Acetylation;Alternativeinitiation;Alternativesplicing;Celladhesion;Cellmembrane;Coiledcoil;Completeproteome;Cytoplasm;Membrane;Nucleus;Phosphoprotein;Polymorphism;Referenceproteome;Repeat;Transcription;Transcriptionregulation;Wntsignalingpathway		PS50176	ARM_REPEAT	0.99983	2.42279e-06	139.54	88.052	124.51	-0.36155	2016700000	0.326771	0.198392	0.25168	O60716
0.947426	1.01147	1.03198	1.01335	1.00371	1.00941	1.02049	0.990164	1.08324	0.991393	0.996939	0.989572	1.0373	0.984677	1.00259	1.00995	1.02878	1.01399	0.994475	0.991173	1.06044	1.0789	1.01672	1.01208	S	36	3	___1	14-3-3 domain binding motif;Calmodulin-dependent protein kinase II substrate motif;G protein-coupled receptor kinase 1 substrate motif;GSK3 kinase substrate motif;PKA kinase substrate motif;PKC kinase substrate motif	+	CST;HTP	biological regulation;biosynthetic process;cellular biosynthetic process;cellular macromolecule biosynthetic process;cellular macromolecule metabolic process;cellular metabolic process;cellular nitrogen compound metabolic process;cellular process;macromolecule biosynthetic process;macromolecule metabolic process;metabolic process;nitrogen compound metabolic process;nucleic acid metabolic process;…		cell part;cytoplasmic part;intracellular membrane-bounded organelle;intracellular organelle;intracellular part;membrane;membrane-bounded organelle;nucleus;organelle;perinuclear region of cytoplasm;plasma membrane		Activator;Alternativesplicing;Cellmembrane;Completeproteome;Cytoplasm;Membrane;Nucleus;Referenceproteome;Transcription;Transcriptionregulation				0.906102	0.000576063	98.257	66.497	87.442	0.1439	327610000	0.353049	0.362168	0.252775	Q86YD1
0.967894	0.988857	1.02068	1.00248	1.01572	1.01662	1.00787	1.01154	1.00026	0.979649	0.968408	0.970233	1.02564	1.00136	1.00542	0.969644	1.12784	0.986913	1.06155	1.00889	1.08177	0.918193	1.00242	1.01692	S	230	3	___1	ERK1,2 kinase substrate motif;G protein-coupled receptor kinase 1 substrate motif;GSK3 kinase substrate motif;GSK-3, ERK1, ERK2, CDK5 substrate motif;WW domain binding motif	+	HTP	axon ensheathment;biological adhesion;cell adhesion;cellular process;ensheathment of neurons;myelination;viral reproduction	binding;protein binding;protein C-terminus binding	apical plasma membrane;apicolateral plasma membrane;cell junction;cell part;cell projection;cell-cell junction;cytoplasm;cytoplasmic part;cytoplasmic vesicle;cytoskeletal part;dendrite;intracellular organelle;intracellular organelle part;intracellular part;membrane;membrane part;neuron projection;occluding junction;organelle;organelle part;plasma membrane part;postsynaptic density;postsynaptic me…	Tight junction	3D-structure;Alternativesplicing;Celljunction;Cellmembrane;Cellprojection;Completeproteome;Host-virusinteraction;Membrane;Phosphoprotein;Polymorphism;Postsynapticcellmembrane;Referenceproteome;Repeat;Synapse;Synaptosome;Tightjunction	RICH1/AMOT polarity complex, Flag-Amot precipitated	PS50106;PS51022	L27;PDZ	0.999992	9.11545e-07	126.69	113.9	126.69	-0.14688	42824000	0.25279	0.915199	0.253019	O75970
0.983587	1.01104	1.03156	1.00333	1.01043	1.0212	1.02763	0.997781	1.05037	0.987612	1.00568	0.997969	1.04132	0.994958	1.015	1.01606	1.0309	1.03147	0.949805	1.00405	1.09087	1.09086	0.993846	1.01536	S	1042	3	___1	14-3-3 domain binding motif;AMP-activated protein kinase 2 substrate motif;Calmodulin-dependent protein kinase II substrate motif;Casein kinase II substrate motif;MAPKAPK1 kinase substrate motif;p70 Ribosomal S6 kinase substrate motif;Phosphorylase kinase substrate motif;PKA kinase substrate motif;PKC kinase substrate motif	+	CST;HTP	biological regulation;biosynthetic process;calcium ion homeostasis;catabolic process;cation homeostasis;cellular biosynthetic process;cellular macromolecule biosynthetic process;cellular macromolecule metabolic process;cellular metabolic process;cellular nitrogen compound metabolic process;cellular process;cellular protein metabolic process;cellular response to chemical stimulus;cellular response…	acid-amino acid ligase activity;binding;catalytic activity;cation binding;chromatin binding;DNA binding;estrogen response element binding;histone acetyl-lysine binding;histone binding;ion binding;kinase activity;ligase activity;ligase activity, forming carbon-nitrogen bonds;metal ion binding;nucleic acid binding;p53 binding;phosphotransferase activity, alcohol group as acceptor;protein binding;pr…	cell part;chromatin;chromosomal part;cytoplasmic part;cytosol;euchromatin;intracellular membrane-bounded organelle;intracellular organelle;intracellular organelle part;intracellular part;membrane-bounded organelle;nuclear chromatin;nuclear chromosome part;nuclear euchromatin;nuclear part;nucleoplasm;nucleus;organelle;organelle part;perichromatin fibrils		3D-structure;Alternativesplicing;Bromodomain;Chromosomalrearrangement;Coiledcoil;Completeproteome;Cytoplasm;Directproteinsequencing;DNA-binding;Isopeptidebond;Ligase;Metal-binding;Nucleus;Phosphoprotein;Polymorphism;Referenceproteome;Repeat;Repressor;Transcription;Transcriptionregulation;Tumorsuppressor;Ublconjugation;Ublconjugationpathway;Zinc;Zinc-finger		PS00518;PS00633;PS01359;PS50014;PS50016;PS50089;PS50119	BROMODOMAIN_1;BROMODOMAIN_2;ZF_BBOX;ZF_PHD_1;ZF_PHD_2;ZF_RING_1;ZF_RING_2	1	0.000360481	101.93	65.404	101.93	0.44161	3808100000	0.548555	0.134251	0.253692	O15164
0.965616	1.0045	1.02199	1.02215	1.00931	1.0179	1.00991	0.966722	1.03018	0.995003	0.998821	1.03794	1.02539	0.993428	1.00753	1.06203	1.0311	1.02161	0.915945	1.05963	1.0822	1.14012	0.999873	1.11341	S	136	4	___1	Casein kinase II substrate motif;ERK1,2 kinase substrate motif;GSK-3, ERK1, ERK2, CDK5 substrate motif;PKA kinase substrate motif;PKC kinase substrate motif;WW domain binding motif	+	CST;HTP	biological regulation;cellular component assembly;cellular component assembly at cellular level;cellular component organization;cellular component organization at cellular level;cellular component organization or biogenesis;cellular component organization or biogenesis at cellular level;cellular macromolecular complex assembly;cellular macromolecular complex subunit organization;cellular process;…		cell part;cytoplasm;cytoplasmic part;intracellular non-membrane-bounded organelle;intracellular organelle;intracellular organelle part;intracellular part;macromolecular complex;membrane;non-membrane-bounded organelle;nuclear membrane;nuclear part;organelle;organelle membrane;organelle part;perinuclear region of cytoplasm;ribonucleoprotein complex;RNA granule;stress granule		3D-structure;Alternativesplicing;Completeproteome;Cytoplasm;Phosphoprotein;Polymorphism;Referenceproteome;Repeat;RNA-binding;Translationregulation		PS50302;PS50303	PUM;PUM_HD	1	1.81425e-14	172.55	135.44	75.146	0.63685	1294100000	0.32361	0.269497	0.253795	Q8TB72
0.940698	1.01508	1.02712	1.0218	0.962482	1.02439	1.02403	0.953031	1.05133	1.01933	0.991266	1.01201	1.01548	1.0021	1.00343	1.03101	1.05594	1.02409	1.00978	0.977089	1.07094	1.11845	1.00427	0.946103	S	34	3	___1	Cdc2 kinase substrate motif;CDK kinase substrate motif;CDK1,2,4,6 kinase substrate motif;ERK1,2 kinase substrate motif;GSK-3, ERK1, ERK2, CDK5 substrate motif;WW domain binding motif	+	HTP	developmental process;multicellular organismal development;multicellular organismal process		cell part;intracellular membrane-bounded organelle;intracellular organelle;intracellular part;membrane-bounded organelle;nucleus;organelle		Alternativesplicing;Completeproteome;Developmentalprotein;Nucleus;Referenceproteome				1	4.04039e-16	163.79	137.66	163.79	0.31068	142880000	0.112878	0.647456	0.255459	Q9NYP3
1.01787	1.02012	1.04343	0.985169	1.05973	1.01708	1.0323	1.09421	0.995337	0.99575	0.981774	0.904596	1.0026	0.979659	1.00712	0.923089	1.03995	1.01849	1.13317	1.01444	1.03321	0.999654	1.01929	0.963163	S	140	3	___1	ATM kinase substrate motif;Casein kinase II substrate motif;DNA dependent Protein kinase substrate motif	+	CST;HTP;LTP	biological regulation;cell cycle;cell cycle checkpoint;cellular component assembly;cellular component assembly at cellular level;cellular component organization;cellular component organization at cellular level;cellular component organization or biogenesis;cellular component organization or biogenesis at cellular level;cellular macromolecular complex assembly;cellular macromolecular complex subun…	binding;damaged DNA binding;DNA binding;enzyme binding;histone binding;nucleic acid binding;protein binding	cell part;chromatin;chromosomal part;chromosome;condensed chromosome;condensed nuclear chromosome;extracellular membrane-bounded organelle;extracellular organelle;extracellular region part;extracellular vesicular exosome;germ cell nucleus;intracellular membrane-bounded organelle;intracellular non-membrane-bounded organelle;intracellular organelle;intracellular organelle part;intracellular part;ma…	Systemic lupus erythematosus	3D-structure;Acetylation;Cellcycle;Chromosome;Completeproteome;DNA-binding;DNAdamage;DNArecombination;DNArepair;Host-virusinteraction;Isopeptidebond;Meiosis;Nucleosomecore;Nucleus;Phosphoprotein;Referenceproteome;Ublconjugation	GammaH2AFX-NDHII-Ku70-DNA complex;H2AX complex I;H2AX complex II;H2AX complex, isolated from cells without IR exposure;MDC1-H2AFX-TP53BP1 complex	PS00046	HISTONE_H2A	0.994723	0.00115693	106.91	85.078	81.017	0.46141	1267300000	0.00729758	0.865706	0.256006	P16104
0.996279	1.00441	1.01448	1.03346	1.01888	1.00459	1.0019	1.01071	1.0344	0.993672	0.980405	0.997877	1.00646	0.989066	1.00702	1.01983	1.05596	1.03488	1.00539	1.00539	1.04574	1.11618	1.02405	0.998089	S	338	3	___1	Casein kinase II substrate motif;ERK1,2 kinase substrate motif;GSK-3, ERK1, ERK2, CDK5 substrate motif;MAPKAPK2 kinase substrate motif;WW domain binding motif	+	CST;HTP	biological regulation;biosynthetic process;cellular biosynthetic process;cellular lipid metabolic process;cellular macromolecule biosynthetic process;cellular macromolecule metabolic process;cellular metabolic process;cellular nitrogen compound metabolic process;cellular process;lipid metabolic process;macromolecule biosynthetic process;macromolecule metabolic process;metabolic process;nitrogen c…	adenyl nucleotide binding;adenyl ribonucleotide binding;ATP binding;binding;catalytic activity;cation binding;DNA binding;helicase activity;hydrolase activity;hydrolase activity, acting on acid anhydrides;hydrolase activity, acting on acid anhydrides, in phosphorus-containing anhydrides;ion binding;ligand-dependent nuclear receptor transcription coactivator activity;metal ion binding;nucleic acid…	cell part;intracellular organelle part;intracellular part;membrane;nuclear part;nucleoplasm;organelle part		Activator;Alternativesplicing;ATP-binding;Completeproteome;DNA-binding;Helicase;Hydrolase;Metal-binding;Nucleotide-binding;Nucleus;Phosphoprotein;Polymorphism;Referenceproteome;Repeat;Transcription;Transcriptionregulation;Zinc;Zinc-finger		PS00028	ZINC_FINGER_C2H2_1	0.999431	2.84459e-40	273.66	249.16	149.6	-0.087687	271180000	0.0171091	0.365307	0.256464	Q9BYK8
0.940486	1.04681	1.08238	1.04499	0.951011	1.01884	1.04598	0.941476	1.06864	0.995236	1.00862	1.06699	1.01447	1.0188	1.03199	1.07563	1.02347	1.0411	0.933854	0.865178	1.01778	1.07266	0.980226	0.998612	S	1147	3	___1	Casein kinase II substrate motif	+	CST;HTP;LTP	biological regulation;biosynthetic process;catabolic process;cell surface receptor linked signaling pathway;cellular biosynthetic process;cellular catabolic process;cellular macromolecule biosynthetic process;cellular macromolecule catabolic process;cellular macromolecule metabolic process;cellular metabolic process;cellular nitrogen compound metabolic process;cellular process;cellular protein me…	binding;nucleic acid binding;RNA binding;translation factor activity, nucleic acid binding;translation initiation factor activity	cell part;cytoplasmic part;cytosol;eukaryotic translation initiation factor 4F complex;intracellular part;macromolecular complex;membrane;protein complex	RNA transport;Viral myocarditis	3D-structure;Acetylation;Alternativeinitiation;Alternativesplicing;Completeproteome;Diseasemutation;Host-virusinteraction;Initiationfactor;Neurodegeneration;Parkinsondisease;Parkinsonism;Phosphoprotein;Polymorphism;Proteinbiosynthesis;Referenceproteome;RNA-binding;Translationregulation	PABPC1-HSPA8-HNRPD-EIF4G1 complex	PS51363;PS51366	MI;W2	0.999981	2.77119e-05	139.29	89.472	78.149	-0.5416	32758000000	0.306235	0.810296	0.256478	Q04637
1.01437	1.01177	1.0147	1.02218	1.06512	1.03736	1.00198	1.02173	1.04245	0.994042	1.00204	0.979761	1.01559	0.996151	1.0221	1.00159	1.0897	1.02734	1.03819	1.04656	1.06366	1.02955	0.970635	0.972587	S	655	3	___1	ERK1,2 kinase substrate motif;GSK-3, ERK1, ERK2, CDK5 substrate motif;PKA kinase substrate motif;PKC kinase substrate motif;WW domain binding motif	+	HTP;LTP	apoptosis;biological regulation;cell cycle;cell cycle checkpoint;cell cycle phase;cell cycle process;cell death;cell division;cell proliferation;cellular component organization;cellular component organization at cellular level;cellular component organization or biogenesis;cellular component organization or biogenesis at cellular level;cellular process;cellular response to stimulus;chromosome segr…	adenyl nucleotide binding;adenyl ribonucleotide binding;ATP binding;binding;catalytic activity;kinase activity;nucleotide binding;phosphotransferase activity, alcohol group as acceptor;protein kinase activity;protein serine/threonine kinase activity;purine nucleotide binding;purine ribonucleoside triphosphate binding;purine ribonucleotide binding;ribonucleotide binding;transferase activity;transf…	cell part;chromosomal part;condensed chromosome kinetochore;condensed chromosome outer kinetochore;condensed nuclear chromosome outer kinetochore;cytoplasm;cytoplasmic part;cytosol;intracellular non-membrane-bounded organelle;intracellular organelle;intracellular organelle part;intracellular part;kinetochore;macromolecular complex;membrane;non-membrane-bounded organelle;nuclear chromosome part;nu…	Cell cycle;Cell cycle - yeast;Meiosis - yeast;Oocyte meiosis;Progesterone-mediated oocyte maturation	3D-structure;Alternativesplicing;Apoptosis;ATP-binding;Cellcycle;Celldivision;Centromere;Chromosome;Chromosomepartition;Completeproteome;Host-virusinteraction;Kinase;Kinetochore;Mitosis;Nucleotide-binding;Nucleus;Phosphoprotein;Polymorphism;Referenceproteome;Serine/threonine-proteinkinase;Transferase;Ublconjugation	BUB1-BUB3 complex	PS00107;PS00108;PS50011;PS51489	BUB1_N;PROTEIN_KINASE_ATP;PROTEIN_KINASE_DOM;PROTEIN_KINASE_ST	1	0.000259914	95.981	57.96	75.961	-0.024907	135260000	0.0942993	0.778702	0.256835	O43683
0.990979	1.01831	1.03479	1.00391	1.01297	1.02869	1.0251	0.989226	1.03675	1.0033	0.996047	1.00937	1.01787	0.996573	1.00464	1.0226	1.05638	1.05161	1.06034	0.977871	1.07443	1.09875	1.04679	1.00335	S	76	3	___1	14-3-3 domain binding motif;Calmodulin-dependent protein kinase II substrate motif;Casein kinase II substrate motif;ERK1,2 kinase substrate motif;G protein-coupled receptor kinase 1 substrate motif;GSK-3, ERK1, ERK2, CDK5 substrate motif;MAPKAPK2 kinase substrate motif;PKA kinase substrate motif;PKC epsilon kinase substrate motif;PKC kinase substrate motif;WW domain binding motif	+	CST;HTP	cellular process;establishment of localization;establishment of localization in cell;establishment of protein localization;Golgi vesicle transport;intracellular transport;post-Golgi vesicle-mediated transport;protein transport;response to chemical stimulus;response to external stimulus;response to extracellular stimulus;response to nutrient;response to nutrient levels;response to retinoic acid;re…	binding;enzyme binding;protein binding;ubiquitin protein ligase binding	cell part;cytoplasmic part;extracellular membrane-bounded organelle;extracellular organelle;extracellular region part;extracellular vesicular exosome;Golgi apparatus part;Golgi membrane;integral to membrane;intracellular organelle part;intracellular part;intrinsic to membrane;membrane;membrane part;membrane-bounded organelle;membrane-bounded vesicle;organelle;organelle membrane;organelle part;ves…		Alternativesplicing;Completeproteome;Membrane;Phosphoprotein;Polymorphism;Proteintransport;Referenceproteome;Transmembrane;Transmembranehelix;Transport;Ublconjugation	SCAMP1-SCAMP2-SCAMP3 complex			0.993757	0.000945665	104.82	47.626	87.713	0.23118	5224000000	0.00541079	0.376458	0.257494	O14828
0.991957	1.01117	1.03022	1.01184	1.0158	1.01622	1.02571	1.01756	1.07072	0.999995	0.987075	0.993454	1.01986	0.998837	1.01088	1.0116	1.04603	1.03774	0.956612	1.07139	1.06613	1.21348	1.01767	1.0225	S	1290	4	___1	b-Adrenergic Receptor kinase substrate motif;ERK1,2 kinase substrate motif;G protein-coupled receptor kinase 1 substrate motif;GSK3 kinase substrate motif;GSK-3, ERK1, ERK2, CDK5 substrate motif;PKA kinase substrate motif;PKC kinase substrate motif;WW domain binding motif	+	CST;HTP	actin filament-based movement;actin filament-based process;anatomical structure morphogenesis;biological regulation;cell chemotaxis;cell migration;cell motility;cell part morphogenesis;cell projection morphogenesis;cell projection organization;cellular component morphogenesis;cellular component movement;cellular component organization;cellular component organization at cellular level;cellular com…	actin binding;actin-dependent ATPase activity;adenyl nucleotide binding;adenyl ribonucleotide binding;ADP binding;ATP binding;ATPase activity;ATPase activity, coupled;binding;calmodulin binding;catalytic activity;cation binding;cytoskeletal protein binding;enzyme activator activity;enzyme regulator activity;GTPase activator activity;GTPase regulator activity;hydrolase activity;hydrolase activity,…	actin cytoskeleton;cell cortex;cell part;cell projection;cell projection part;cytoplasm;cytoplasmic part;cytoskeletal part;cytoskeleton;cytosol;filamentous actin;filopodium tip;intracellular non-membrane-bounded organelle;intracellular organelle;intracellular organelle part;intracellular part;lamellipodium;macromolecular complex;membrane;myosin complex;non-membrane-bounded organelle;organelle;org…		Acetylation;Actin-binding;Alternativesplicing;ATP-binding;Calmodulin-binding;Coiledcoil;Completeproteome;Cytoplasm;Cytoskeleton;GTPaseactivation;Metal-binding;Motorprotein;Myosin;Nucleotide-binding;Phosphoprotein;Referenceproteome;Repeat;Zinc;Zinc-finger		PS00479;PS50081;PS50096;PS50200;PS50238;PS51456	IQ;MYOSIN_MOTOR;RA;RHOGAP;ZF_DAG_PE_1;ZF_DAG_PE_2	0.999984	2.43186e-16	176.17	145.08	103.95	-1.2707	1459800000	0.111026	0.291323	0.259379	Q13459
0.948827	1.00811	1.03938	1.00064	1.00353	1.01873	1.0292	0.993103	1.06955	0.976581	1.01802	1.01137	1.09354	0.962837	1.0135	1.01821	1.03792	1.01366	0.878652	1.00009	1.06477	1.0814	1.03324	1.10207	S	1565	3	___1	14-3-3 domain binding motif;Calmodulin-dependent protein kinase II substrate motif;PAK2 kinase substrate motif;PKA kinase substrate motif;PKC epsilon kinase substrate motif;PKC kinase substrate motif	+	CST;HTP;LTP	biological regulation;cell surface receptor linked signaling pathway;cellular macromolecule metabolic process;cellular metabolic process;cellular process;cellular protein metabolic process;cellular response to stimulus;enzyme linked receptor protein signaling pathway;establishment of localization;establishment of localization in cell;intracellular signal transduction;intracellular transport;macro…	binding;cAMP-dependent protein kinase activity;catalytic activity;cation binding;cyclic nucleotide-dependent protein kinase activity;enzyme regulator activity;GTPase regulator activity;guanyl-nucleotide exchange factor activity;ion binding;kinase activity;metal ion binding;molecular transducer activity;nucleoside-triphosphatase regulator activity;phosphotransferase activity, alcohol group as acce…	cell part;cytoplasm;cytoplasmic part;cytosol;intracellular membrane-bounded organelle;intracellular organelle;intracellular part;membrane;membrane-bounded organelle;nucleus;organelle;perinuclear region of cytoplasm		3D-structure;Alternativesplicing;Coiledcoil;Completeproteome;Cytoplasm;Guanine-nucleotidereleasingfactor;Membrane;Metal-binding;Nucleus;Phosphoprotein;Polymorphism;Proto-oncogene;Referenceproteome;Zinc;Zinc-finger		PS00479;PS50003;PS50010;PS50081	DH_2;PH_DOMAIN;ZF_DAG_PE_1;ZF_DAG_PE_2	1	0.000847313	102.52	86.345	61.213	1.1302	916370000	0.789535	0.152646	0.259447	Q12802
1.00024	1.0003	1.02038	1.01112	1.03153	1.03192	1.0203	1.03051	0.965637	0.969796	1.00068	1.01965	1.00456	0.963559	0.996765	1.04215	0.9937	1.00543	1.07366	0.903774	0.961618	0.763737	1.03279	0.995796	S	4496	4	___1	Casein kinase II substrate motif;Cdc2 kinase substrate motif;CDK kinase substrate motif;CDK1,2,4,6 kinase substrate motif;ERK1,2 kinase substrate motif;G protein-coupled receptor kinase 1 substrate motif;Growth associated histone HI kinase substrate motif;GSK-3, ERK1, ERK2, CDK5 substrate motif;MDC1 BRCT domain binding motif;Plk1 PBD domain binding motif;WW domain binding motif	+	CST;HTP	anatomical structure formation involved in morphogenesis;biological regulation;cell cycle arrest;cell cycle process;cell surface receptor linked signaling pathway;cellular process;cellular response to stimulus;developmental process;establishment of localization;establishment of localization in cell;establishment of protein localization;establishment of protein localization in endoplasmic reticulu…	actin binding;actin filament binding;ATPase activity;binding;calcium ion binding;catalytic activity;cation binding;cytoskeletal protein binding;hydrolase activity;hydrolase activity, acting on acid anhydrides;hydrolase activity, acting on acid anhydrides, in phosphorus-containing anhydrides;ion binding;metal ion binding;nucleoside-triphosphatase activity;protein binding;pyrophosphatase activity	actin cytoskeleton;cell part;cell projection membrane;cell projection part;cytoplasm;cytoplasmic part;cytoskeletal part;cytoskeleton;Golgi apparatus;intracellular membrane-bounded organelle;intracellular non-membrane-bounded organelle;intracellular organelle;intracellular organelle part;intracellular part;leading edge membrane;macromolecular complex;membrane;membrane part;membrane-bounded organel…		Acetylation;Actin-binding;Alternativesplicing;Calcium;Cellmembrane;Cellprojection;Completeproteome;Cytoplasm;Cytoskeleton;Golgiapparatus;Leucine-richrepeat;Membrane;Metal-binding;Microtubule;Phosphoprotein;Polymorphism;Referenceproteome;Repeat;SH3domain;Wntsignalingpathway		PS00018;PS00019;PS00020;PS50021;PS50222;PS51460	ACTININ_1;ACTININ_2;CH;EF_HAND_1;EF_HAND_2;GAR	0.958757	5.23713e-07	103.5	87.908	94.01	-0.21301	785150000	0.211102	0.749168	0.259608	Q9UPN3
0.937929	1.01181	1.0219	1.01974	0.958873	1.01687	1.01768	0.959993	1.05982	1.00779	0.975152	1.02091	1.0307	1.00366	1.0075	1.02635	1.05569	1.02757	1.02654	0.955795	1.08928	1.05674	1.04346	0.97187	S	547	3	___1	b-Adrenergic Receptor kinase substrate motif;Cdc2 kinase substrate motif;CDK kinase substrate motif;CDK1,2,4,6 kinase substrate motif;ERK1,2 kinase substrate motif;Growth associated histone HI kinase substrate motif;GSK-3, ERK1, ERK2, CDK5 substrate motif;PKA kinase substrate motif;PKC kinase substrate motif;WW domain binding motif	+	CST;HTP	anatomical structure formation involved in morphogenesis;cellular metabolic process;cellular process;developmental process;metabolic process;osteoclast fusion;reactive oxygen species metabolic process;superoxide metabolic process;syncytium formation;syncytium formation by plasma membrane fusion	binding;lipid binding;phosphatidylinositol binding;phospholipid binding	cell junction;cell part;cell projection;cytoplasm;cytoskeletal part;intracellular non-membrane-bounded organelle;intracellular organelle;intracellular organelle part;intracellular part;macromolecular complex;non-membrane-bounded organelle;organelle;organelle part;podosome;protein complex		3D-structure;Alternativesplicing;Celljunction;Cellprojection;Coiledcoil;Completeproteome;Cytoplasm;Phosphoprotein;Polymorphism;Referenceproteome;Repeat;SH3domain		PS50002;PS50195	PX;SH3	0.999993	6.6904e-53	268.43	237.9	268.43	-0.1726	300800000	0.0678276	0.521028	0.26064	Q5TCZ1
0.985802	0.99603	1.00993	1.0112	1.02291	1.01413	1.00426	1.00171	1.07254	0.990833	0.983818	0.998432	1.05378	0.987738	1.00384	1.01709	1.02276	1.02083	0.886742	1.07514	1.09629	1.17925	0.990252	1.04494	S	459	3	___1	14-3-3 domain binding motif;Calmodulin-dependent protein kinase II substrate motif;Casein kinase II substrate motif;ERK1,2 kinase substrate motif;GSK-3, ERK1, ERK2, CDK5 substrate motif;MAPKAPK2 kinase substrate motif;PKA kinase substrate motif;PKC epsilon kinase substrate motif;PKC kinase substrate motif;WW domain binding motif	+	CST;HTP	attachment of spindle microtubules to chromosome;attachment of spindle microtubules to kinetochore;attachment of spindle microtubules to kinetochore involved in mitotic sister chromatid segregation;biological regulation;cell cycle process;cellular component organization;cellular component organization at cellular level;cellular component organization or biogenesis;cellular component organization …	binding;cation binding;ion binding;metal ion binding;nucleic acid binding	cell part;chromosomal part;chromosome;condensed chromosome;condensed chromosome kinetochore;cytoplasm;cytoskeletal part;intracellular membrane-bounded organelle;intracellular non-membrane-bounded organelle;intracellular organelle;intracellular organelle part;intracellular part;kinetochore;macromolecular complex;membrane-bounded organelle;non-membrane-bounded organelle;nuclear part;nucleoplasm;nuc…		Acetylation;Centromere;Chromosome;Completeproteome;Cytoplasm;Cytoskeleton;Kinetochore;Metal-binding;Nucleus;Phosphoprotein;Polymorphism;Referenceproteome;Zinc;Zinc-finger		PS00028;PS50157	ZINC_FINGER_C2H2_1;ZINC_FINGER_C2H2_2	0.983549	3.5821e-10	147.49	127.91	147.49	-0.36975	667930000	0.458895	0.193654	0.261774	Q96JM3
0.990472	0.993547	1.03318	0.973068	1.00594	0.986774	0.996141	1.00923	0.965217	1.02391	1.02385	0.975351	1.01784	0.945229	1.00387	0.999916	1.04268	1.03519	1.0231	0.925953	1.07269	1.02127	1.07489	1.02697	S	2046	3	___1	14-3-3 domain binding motif;Akt kinase substrate motif;Calmodulin-dependent protein kinase II substrate motif;ERK1,2 kinase substrate motif;Growth associated histone HI kinase substrate motif;GSK-3, ERK1, ERK2, CDK5 substrate motif;MAPKAPK1 kinase substrate motif;MAPKAPK2 kinase substrate motif;PKA kinase substrate motif;PKC kinase substrate motif;WW domain binding motif	+	CST;HTP	cellular macromolecule metabolic process;cellular metabolic process;cellular nitrogen compound metabolic process;cellular process;macromolecule metabolic process;metabolic process;mRNA metabolic process;mRNA processing;nitrogen compound metabolic process;nuclear mRNA splicing, via spliceosome;nucleic acid metabolic process;nucleobase-containing compound metabolic process;primary metabolic process…	binding;C2H2 zinc finger domain binding;protein binding;protein domain specific binding;protein N-terminus binding	Cajal body;catalytic step 2 spliceosome;cell part;intracellular organelle part;intracellular part;macromolecular complex;nuclear body;nuclear part;nuclear speck;nucleoplasm;nucleoplasm part;organelle part;ribonucleoprotein complex;spliceosomal complex		Acetylation;Alternativesplicing;Coiledcoil;Completeproteome;Directproteinsequencing;mRNAprocessing;mRNAsplicing;Nucleus;Phosphoprotein;Polymorphism;Referenceproteome;RNA-binding;Spliceosome	C complex spliceosome;Spliceosome;SRm160/300 complex;SRm160-SRm300 complex			1	0.00241868	89.317	38.258	54.343	-0.31612	535490000	0.141774	0.41289	0.26243	Q9UQ35
0.985155	0.996527	1.00921	1.02669	1.00548	1.00379	1.00601	1.03784	1.05647	1.0023	0.970315	0.978437	1.06364	1.00082	0.994681	1.01274	1.10697	0.995482	0.846333	1.02472	1.19105	1.09794	1.00716	1.03715	S	89	4	___1	14-3-3 domain binding motif;Calmodulin-dependent protein kinase II substrate motif;ERK1,2 kinase substrate motif;G protein-coupled receptor kinase 1 substrate motif;Growth associated histone HI kinase substrate motif;GSK-3, ERK1, ERK2, CDK5 substrate motif;PKA kinase substrate motif;PKC kinase substrate motif;WW domain binding motif	+	CST;HTP	biological regulation;cell cycle;cell cycle process;cell differentiation;cellular component movement;cellular component organization;cellular component organization at cellular level;cellular component organization or biogenesis;cellular component organization or biogenesis at cellular level;cellular developmental process;cellular process;cytoskeleton-dependent intracellular transport;development…	binding;identical protein binding;protein binding;protein complex binding;protein dimerization activity;protein homodimerization activity	acrosomal vesicle;cell part;cell projection;centriolar satellite;centriole;centrosome;cytoplasmic membrane-bounded vesicle;cytoplasmic part;cytoplasmic vesicle;cytoskeletal part;cytoskeleton;cytosol;extracellular region part;intercellular bridge;intracellular membrane-bounded organelle;intracellular non-membrane-bounded organelle;intracellular organelle;intracellular organelle part;intracellular …		Alternativesplicing;Cellcycle;Cellprojection;Ciliumbiogenesis/degradation;Completeproteome;Cytoplasm;Cytoplasmicvesicle;Cytoskeleton;Developmentalprotein;Differentiation;Phosphoprotein;Polymorphism;Referenceproteome;Spermatogenesis;Transport;Ublconjugation				0.785378	1.65458e-47	219.26	202.95	172.06	-0.2182	676630000	0.575568	0.145009	0.264076	Q9UPN4
0.986705	1.01213	1.02376	0.995473	1.0166	1.01455	1.01698	0.997582	1.00855	0.991495	0.993535	0.999262	0.999208	0.988928	1.00147	1.01577	1.03146	1.02329	1.06623	0.960374	1.02162	0.94323	0.995563	0.99589	S	368	2	___1	Casein kinase I substrate motif;Casein kinase II substrate motif;ERK1,2 kinase substrate motif;G protein-coupled receptor kinase 1 substrate motif;GSK3 kinase substrate motif;GSK-3, ERK1, ERK2, CDK5 substrate motif;PKA kinase substrate motif;Pyruvate dehydrogenase kinase substrate motif;WW domain binding motif	+	HTP	anatomical structure homeostasis;base-excision repair;biological regulation;biosynthetic process;cell cycle;cellular biosynthetic process;cellular component organization;cellular component organization at cellular level;cellular component organization or biogenesis;cellular component organization or biogenesis at cellular level;cellular macromolecule biosynthetic process;cellular macromolecule me…	adenyl nucleotide binding;adenyl ribonucleotide binding;ATP binding;ATPase activity;ATPase activity, coupled;binding;catalytic activity;DNA binding;DNA clamp loader activity;DNA-dependent ATPase activity;double-stranded DNA binding;enzyme activator activity;enzyme regulator activity;hydrolase activity;hydrolase activity, acting on acid anhydrides;hydrolase activity, acting on acid anhydrides, in …	cell junction;cell part;chromosomal part;cytoplasmic part;DNA replication factor C complex;extracellular membrane-bounded organelle;extracellular organelle;extracellular region part;extracellular vesicular exosome;Golgi apparatus;intracellular membrane-bounded organelle;intracellular non-membrane-bounded organelle;intracellular organelle;intracellular organelle part;intracellular part;macromolecu…	DNA replication;Mismatch repair;Nucleotide excision repair	3D-structure;Activator;Alternativesplicing;ATP-binding;Completeproteome;Directproteinsequencing;DNA-binding;DNAreplication;Nucleotide-binding;Nucleus;Phosphoprotein;Polymorphism;Referenceproteome;Transcription;Transcriptionregulation	BASC (Ab 80) complex (BRCA1-associated genome surveillance complex);BASC (Ab 81) complex (BRCA1-associated genome surveillance complex);BASC complex (BRCA1-associated genome surveillance complex);BRD4-RFC complex;DNA synthesome complex (13 subunits);DNA synthesome complex (15 subunits);DNA synthesome complex (17 subunits);DNA synthesome core complex;RC complex (Replication competent complex);RC c…	PS50172	BRCT	0.999466	8.40082e-17	223.07	183.13	177.44	2.3642	2127300000	0.795849	0.53338	0.265272	P35251
0.946918	1.02029	1.02441	1.027	0.977483	1.04167	1.00765	1.00324	0.945178	0.985161	0.99188	1.05971	1.0169	0.971427	0.973495	1.0792	1.07593	1.00252	0.833827	0.914944	1.15968	1.0677	0.969675	1.03907	S	395	3	___1	ERK1,2 kinase substrate motif;GSK-3, ERK1, ERK2, CDK5 substrate motif;PKA kinase substrate motif;WW domain binding motif	+	CST;HTP		binding;carbohydrate binding			Alternativesplicing;Completeproteome;Lectin;Phosphoprotein;Polymorphism;Referenceproteome;Repeat		PS50231;PS50915	CRYSTALLIN_BETA_GAMMA;RICIN_B_LECTIN	1	4.15948e-09	125.91	99.251	67.952	-0.30245	118580000	0.994567	0.172644	0.265351	Q68DQ2
0.990465	1.01375	1.03097	0.995446	1.01787	1.01803	1.02022	1.00669	1.04536	0.993916	0.997267	0.987481	1.02618	0.99977	1.0144	1.01161	1.0464	1.04624	1.0183	0.985766	1.05998	1.10205	1.03493	1.01765	T	1220	3	___1	Casein kinase II substrate motif;GSK-3, ERK1, ERK2, CDK5 substrate motif;PKA kinase substrate motif;PKC kinase substrate motif;RAF1 kinase substrate motif;WW domain binding motif	+	CST;HTP	biosynthetic process;carbohydrate metabolic process;catabolic process;cellular biosynthetic process;cellular carbohydrate metabolic process;cellular component assembly;cellular component assembly at cellular level;cellular component disassembly;cellular component disassembly at cellular level;cellular component organization;cellular component organization at cellular level;cellular component orga…	binding;catalytic activity;hydrolase activity;hydrolase activity, acting on ester bonds;inositol or phosphatidylinositol phosphatase activity;inositol phosphate phosphatase activity;inositol trisphosphate phosphatase activity;inositol-polyphosphate 5-phosphatase activity;nucleic acid binding;nucleotide binding;phosphatase activity;phosphatidylinositol bisphosphate phosphatase activity;phosphatidy…	cell part;cytoplasmic part;cytosol;intracellular part;macromolecular complex;membrane coat;membrane part;protein complex	Inositol phosphate metabolism;Phosphatidylinositol signaling system	3D-structure;Alternativesplicing;Completeproteome;Cytoplasm;Diseasemutation;Endocytosis;Hydrolase;Neurodegeneration;Parkinsondisease;Parkinsonism;Phosphoprotein;Polymorphism;Referenceproteome;Repeat;RNA-binding		PS50102;PS50275	RRM;SAC	0.997166	2.16559e-05	97.235	79.91	97.235	1.0952	625620000	0.0212921	0.108247	0.266301	O43426
0.957842	0.995395	1.034	1.00925	0.982861	0.989806	1.02349	1.00748	1.10258	1.01299	1.03758	0.957751	1.02236	0.987789	1.03384	0.96672	1.04961	1.02367	0.975313	1.02957	1.08618	1.11524	0.996331	1.00686	S	721	3	___1	Cdc2 kinase substrate motif;CDK kinase substrate motif;CDK1,2,4,6 kinase substrate motif;ERK1,2 kinase substrate motif;Growth associated histone HI kinase substrate motif;GSK-3, ERK1, ERK2, CDK5 substrate motif;MAPKAPK2 kinase substrate motif;MDC1 BRCT domain binding motif;Plk1 PBD domain binding motif;WW domain binding motif	+	HTP	cellular component organization;cellular component organization at cellular level;cellular component organization or biogenesis;cellular component organization or biogenesis at cellular level;cellular process;cognition;developmental process;endoplasmic reticulum organization;endosome transport;establishment of localization;establishment of localization in cell;establishment of protein localizatio…		cell part;cytoplasmic part;extracellular membrane-bounded organelle;extracellular organelle;extracellular region part;extracellular vesicular exosome;Golgi apparatus part;Golgi membrane;intracellular organelle part;intracellular part;membrane;membrane-bounded organelle;membrane-bounded vesicle;organelle;organelle membrane;organelle part;vesicle		Alternativesplicing;Completeproteome;Phosphoprotein;Polymorphism;Proteintransport;Referenceproteome;Transport				0.92901	1.93159e-10	141.86	123.07	141.86	0.32341	62033000	0.203444	0.825568	0.266408	Q9Y3R5
0.931559	1.02381	1.10294	0.985339	0.931612	1.00902	1.03306	1.03	0.914493	0.983417	1.03418	0.917728	0.974336	0.936073	1.04571	0.913941	0.979883	1.02117	1.27245	0.898308	0.928954	0.820731	0.966686	0.975059	S	54	4	___1	ATM kinase substrate motif;Casein kinase II substrate motif;DNA dependent Protein kinase substrate motif;G protein-coupled receptor kinase 1 substrate motif;GSK3 kinase substrate motif;MAPKAPK2 kinase substrate motif;PKA kinase substrate motif;PKC kinase substrate motif;Pyruvate dehydrogenase kinase substrate motif	+	CST;HTP			cell part;cytoplasm;intracellular membrane-bounded organelle;intracellular organelle;intracellular part;membrane-bounded organelle;nucleus;organelle		Alternativesplicing;Completeproteome;Nucleus;Phosphoprotein;Polymorphism;Referenceproteome				0.99747	7.41986e-25	192.25	150.69	162.71	-1.7848	1028500000	0.655551	0.261302	0.266896	Q9H1E3
0.963484	1.02539	1.03882	0.983782	0.995273	1.02673	1.02511	0.984601	1.10066	1.00777	1.00982	1.04327	1.04213	1.02366	1.01634	1.07174	1.07778	1.03883	0.848245	1.03822	1.12003	1.1928	0.983146	1.07265	S	620	3	___1	Casein kinase II substrate motif;G protein-coupled receptor kinase 1 substrate motif;GSK3 kinase substrate motif;PKA kinase substrate motif;PKC kinase substrate motif	+	HTP	biological regulation;cell maturation;cell migration;cell motility;cell surface receptor linked signaling pathway;cellular component movement;cellular developmental process;cellular process;cellular response to stimulus;developmental maturation;developmental process;enzyme linked receptor protein signaling pathway;ephrin receptor signaling pathway;locomotion;neuron maturation;neuron remodeling;re…		cell part;cell projection;cytoplasm;intracellular organelle part;intracellular part;neuron projection;nuclear part;nucleoplasm;organelle part		3D-structure;Acetylation;Alternativesplicing;ANKrepeat;Cellprojection;Completeproteome;Cytoplasm;Directproteinsequencing;Phosphoprotein;Polymorphism;Referenceproteome;Repeat		PS01179;PS50088;PS50105;PS50297	ANK_REP_REGION;ANK_REPEAT;PID;SAM_DOMAIN	1	0.0100842	70.908	33.359	70.908	-0.16315	312630000	0.449156	0.283015	0.269613	Q92625
0.969365	0.989147	0.998859	0.989258	0.996535	0.980294	0.98144	0.989898	1.00277	0.995638	0.984925	1.04011	1.02079	0.963728	1.00658	1.05371	1.07801	1.04135	0.894309	0.977915	1.09256	1.06676	1.029	0.994147	S	512	2	___1	MDC1 BRCT domain binding motif;PKA kinase substrate motif;Plk1 PBD domain binding motif	+	HTP		structural molecule activity	basement membrane;extracellular matrix part;extracellular membrane-bounded organelle;extracellular organelle;extracellular region part;extracellular vesicular exosome;membrane-bounded organelle;membrane-bounded vesicle;organelle;vesicle		Basementmembrane;Completeproteome;Extracellularmatrix;Phosphoprotein;Polymorphism;Referenceproteome;Repeat;Secreted				0.941868	9.60612e-09	128.26	108.17	117.89	-0.35225	186030000	0.207137	0.261593	0.269866	O00515
0.983929	0.989071	1.02462	1.00301	1.00787	1.01363	1.00424	1.00129	1.07086	1.00408	0.991285	0.983288	1.01981	1.00801	1.01321	1.02643	1.06596	1.01684	1.04012	1.05337	1.04519	1.00102	0.999014	0.987198	S	1126	2	___1	14-3-3 domain binding motif;Calmodulin-dependent protein kinase II substrate motif;Calmodulin-dependent protein kinase IV substrate motif;Casein kinase II substrate motif;Chk1 kinase substrate motif;PKA kinase substrate motif;PKC kinase substrate motif	+	HTP	B cell activation;B cell differentiation;biological regulation;cell activation;cell differentiation;cellular component organization;cellular component organization or biogenesis;cellular developmental process;cellular membrane organization;cellular process;developmental process;establishment of localization;immature B cell differentiation;immune system process;ion transmembrane transport;ion tran…	adenyl nucleotide binding;adenyl ribonucleotide binding;ATP binding;ATPase activity;ATPase activity, coupled;ATPase activity, coupled to movement of substances;binding;catalytic activity;cation binding;hydrolase activity;hydrolase activity, acting on acid anhydrides;hydrolase activity, acting on acid anhydrides, in phosphorus-containing anhydrides;ion binding;lipid transporter activity;magnesium …	cell part;cytoplasmic part;endoplasmic reticulum;endoplasmic reticulum membrane;endoplasmic reticulum part;endosome;integral to membrane;intracellular membrane-bounded organelle;intracellular organelle;intracellular organelle part;intracellular part;intrinsic to membrane;lysosomal membrane;membrane;membrane part;membrane-bounded organelle;organelle;organelle membrane;organelle part;plasma membran…		Alternativesplicing;ATP-binding;Cellmembrane;Completeproteome;Endoplasmicreticulum;Hydrolase;Lipidtransport;Magnesium;Membrane;Metal-binding;Nucleotide-binding;Phosphoprotein;Polymorphism;Referenceproteome;Transmembrane;Transmembranehelix;Transport		PS00154	ATPASE_E1_E2	0.983981	0.000345123	134.25	108.77	134.25	-0.19529	155860000	0.0821085	0.523186	0.27161	Q8NB49
0.993548	0.993679	1.02933	1.04466	1.06694	1.0288	1.00763	1.02236	0.987511	0.985877	0.977299	1.01192	1.00564	0.997227	1.0098	1.04535	1.0363	1.01014	1.08254	0.944757	1.03723	0.933926	0.983344	0.995518	T	926	3	___1	Cdc2 kinase substrate motif;CDK1,2,4,6 kinase substrate motif;Growth associated histone HI kinase substrate motif;GSK-3, ERK1, ERK2, CDK5 substrate motif;WW domain binding motif	+	HTP;LTP	antigen processing and presentation;antigen processing and presentation of exogenous antigen;antigen processing and presentation of exogenous peptide antigen;antigen processing and presentation of exogenous peptide antigen via MHC class II;antigen processing and presentation of peptide antigen;antigen processing and presentation of peptide antigen via MHC class II;antigen processing and presentat…	adenyl nucleotide binding;adenyl ribonucleotide binding;ATP binding;ATPase activity;binding;catalytic activity;enzyme binding;hydrolase activity;hydrolase activity, acting on acid anhydrides;hydrolase activity, acting on acid anhydrides, in phosphorus-containing anhydrides;kinase binding;microtubule motor activity;motor activity;nucleoside-triphosphatase activity;nucleotide binding;plus-end-direc…	cell part;cytoplasm;cytoplasmic part;cytoskeletal part;cytosol;intracellular non-membrane-bounded organelle;intracellular organelle;intracellular organelle part;intracellular part;kinesin complex;macromolecular complex;membrane;microtubule;microtubule associated complex;non-membrane-bounded organelle;organelle;organelle part;protein complex;spindle;spindle pole		3D-structure;Acetylation;ATP-binding;Cellcycle;Celldivision;Coiledcoil;Completeproteome;Cytoplasm;Cytoskeleton;Diseasemutation;Microtubule;Mitosis;Motorprotein;Nucleotide-binding;Phosphoprotein;Polymorphism;Referenceproteome	Kaiso-NCOR complex	PS00411;PS50067	KINESIN_MOTOR_1;KINESIN_MOTOR_2	0.994611	3.99012e-05	99.927	61.738	83.087	0.27523	317310000	0.445021	0.766969	0.271975	P52732
0.953001	1.0228	1.0367	1.00802	0.978628	1.02115	1.02743	0.972475	1.0348	0.98578	0.99439	1.01279	1.01436	0.997018	1.00823	1.02776	1.05016	1.03488	0.97146	0.96775	1.09043	1.06309	1.00777	0.994513	S	947	3	___1	14-3-3 domain binding motif;b-Adrenergic Receptor kinase substrate motif;Calmodulin-dependent protein kinase II substrate motif;Calmodulin-dependent protein kinase IV substrate motif;Casein kinase II substrate motif;Chk1 kinase substrate motif;G protein-coupled receptor kinase 1 substrate motif;PKA kinase substrate motif;PKC kinase substrate motif	+	CST;HTP;LTP	biological regulation;biosynthetic process;cell migration;cell motility;cellular biosynthetic process;cellular component movement;cellular macromolecule biosynthetic process;cellular macromolecule metabolic process;cellular metabolic process;cellular nitrogen compound metabolic process;cellular process;cellular response to stimulus;establishment of cell polarity;establishment or maintenance of ce…	binding;enzyme binding;kinase binding;protein binding;protein binding transcription factor activity;protein complex scaffold;structural molecule activity;transcription coactivator activity;transcription cofactor activity;transcription factor binding transcription factor activity	cell part;cell projection membrane;cell projection part;cytoplasm;cytoplasmic part;cytosol;intracellular membrane-bounded organelle;intracellular organelle;intracellular part;leading edge membrane;macromolecular complex;membrane part;membrane-bounded organelle;nucleus;organelle;perinuclear region of cytoplasm;plasma membrane part;protein complex;ruffle membrane		3D-structure;Activator;Alternativesplicing;Cellmembrane;Cellprojection;Coiledcoil;Completeproteome;Cytoplasm;Membrane;Nucleus;Phosphoprotein;Polymorphism;Referenceproteome;Repeat;Transcription;Transcriptionregulation		PS01159;PS50020	WW_DOMAIN_1;WW_DOMAIN_2	0.930672	9.32372e-13	169.37	112.82	156.37	0.13323	1180800000	0.35537	0.347023	0.272766	Q8IX03
0.943929	1.01615	1.03313	1.02395	1.00202	1.02122	1.02217	0.989178	0.99453	0.973505	0.989494	0.996468	0.995404	0.969628	0.998191	1.01637	1.08163	1.03765	0.989308	0.973788	1.13397	1.08006	1.02207	1.02364	S	527	3	___2	14-3-3 domain binding motif;ATM kinase substrate motif;Calmodulin-dependent protein kinase II substrate motif;Casein kinase II substrate motif;DNA dependent Protein kinase substrate motif;PAK2 kinase substrate motif;PKA kinase substrate motif;PKC epsilon kinase substrate motif;PKC kinase substrate motif	+	CST;HTP	cellular macromolecule metabolic process;cellular metabolic process;cellular nitrogen compound metabolic process;cellular process;macromolecule metabolic process;metabolic process;mRNA metabolic process;mRNA processing;nitrogen compound metabolic process;nucleic acid metabolic process;nucleobase-containing compound metabolic process;primary metabolic process;RNA metabolic process;RNA processing;R…		cell part;intracellular organelle part;intracellular part;macromolecular complex;nuclear part;organelle part;precatalytic spliceosome;ribonucleoprotein complex;spliceosomal complex	Spliceosome	Acetylation;Alternativesplicing;Coiledcoil;Completeproteome;mRNAprocessing;mRNAsplicing;Nucleus;Phosphoprotein;Referenceproteome;Spliceosome				0.999767	1.66845e-13	177.07	135.53	92.633	-0.60785	903590000	0.024087	0.225654	0.274086	Q5VTL8
0.947698	1.00419	1.02274	0.999127	0.967199	1.01589	1.01152	0.992958	1.07829	0.978353	0.996306	1.01423	1.04667	0.963472	1.01074	1.01997	1.05098	1.03052	0.974994	0.949677	1.07371	1.08206	1.01181	1.00603	S	492	3	___1	Casein kinase II substrate motif;ERK1,2 kinase substrate motif;G protein-coupled receptor kinase 1 substrate motif;Growth associated histone HI kinase substrate motif;GSK-3, ERK1, ERK2, CDK5 substrate motif;MAPKAPK2 kinase substrate motif;WW domain binding motif	+	HTP	anatomical structure morphogenesis;autophagy;biological regulation;catabolic process;cellular catabolic process;cellular component organization;cellular component organization at cellular level;cellular component organization or biogenesis;cellular component organization or biogenesis at cellular level;cellular metabolic process;cellular process;chromatin organization;chromosome organization;deve…	protein binding transcription factor activity;transcription cofactor activity;transcription factor binding transcription factor activity	cell part;histone acetyltransferase complex;intracellular non-membrane-bounded organelle;intracellular organelle;intracellular organelle part;intracellular part;macromolecular complex;non-membrane-bounded organelle;nuclear part;nucleolus;nucleoplasm part;organelle;organelle part;protein complex;SAGA complex;SAGA-type complex		Alternativesplicing;Autophagy;Completeproteome;Developmentalprotein;Gastrulation;Nucleus;Phosphoprotein;Polymorphism;Referenceproteome				0.967583	1.65103e-05	91.065	74.124	89.529	-0.042127	71984000	0.318054	0.383119	0.274183	Q8NEM7
0.972142	0.99603	1.01865	1.03651	0.985194	1.01476	1.01195	1.00148	1.01086	1.00299	0.989255	0.997952	1.0228	1.00656	1.016	1.02237	1.08823	1.01698	1.06753	0.996658	1.05551	0.988807	0.998397	0.991346	S	420	3	___1	Casein kinase II substrate motif;G protein-coupled receptor kinase 1 substrate motif;GSK3 kinase substrate motif;PAK2 kinase substrate motif;PKA kinase substrate motif;PKC kinase substrate motif	+	CST;HTP	anatomical structure morphogenesis;biological regulation;developmental process;morphogenesis of an epithelium;positive regulation of molecular function;positive regulation of NF-kappaB transcription factor activity;positive regulation of sequence-specific DNA binding transcription factor activity;regulation of biological process;regulation of biosynthetic process;regulation of cellular biosynthet…	adenyl nucleotide binding;adenyl ribonucleotide binding;ATP binding;binding;catalytic activity;kinase activity;nucleotide binding;phosphotransferase activity, alcohol group as acceptor;protein kinase activity;protein serine/threonine kinase activity;purine nucleotide binding;purine ribonucleoside triphosphate binding;purine ribonucleotide binding;ribonucleotide binding;transferase activity;transf…	cell part;cytoplasm;intracellular membrane-bounded organelle;intracellular organelle;intracellular part;membrane;membrane-bounded organelle;nucleus;organelle		Alternativesplicing;ANKrepeat;ATP-binding;Completeproteome;Cytoplasm;Diseasemutation;Isopeptidebond;Kinase;Membrane;Nucleotide-binding;Phosphoprotein;Polymorphism;Receptor;Referenceproteome;Repeat;Serine/threonine-proteinkinase;Transferase;Ublconjugation		PS00107;PS00108;PS50011;PS50088;PS50297	ANK_REP_REGION;ANK_REPEAT;PROTEIN_KINASE_ATP;PROTEIN_KINASE_DOM;PROTEIN_KINASE_ST	0.999934	1.23416e-10	148.69	121.66	118.19	0.45274	45524000	0.153671	0.656137	0.274635	P57078
1.01554	0.999713	1.02061	1.03086	1.00811	1.04081	1.02241	1.02586	0.907549	0.962117	0.956771	1.02652	0.962472	0.950438	0.969407	1.06472	1.097	0.991119	0.962432	0.942702	1.16291	1.03416	1.06055	1.0167	S	104	3	___1	PKA kinase substrate motif;PKC kinase substrate motif	+	CST;HTP	biological regulation;positive regulation of biological process;positive regulation of cell proliferation;positive regulation of cellular process;regulation of biological process;regulation of cell proliferation;regulation of cellular process		cell part;cytoplasm;extracellular membrane-bounded organelle;extracellular organelle;extracellular region part;extracellular vesicular exosome;intracellular part;membrane;membrane-bounded organelle;membrane-bounded vesicle;organelle;plasma membrane;vesicle	Fc gamma R-mediated phagocytosis;Leishmaniasis	Actin-binding;Calmodulin-binding;Cellmembrane;Completeproteome;Cytoplasm;Lipoprotein;Membrane;Myristate;Phosphoprotein;Referenceproteome		PS00826;PS00827	MARCKS_1;MARCKS_2	1	0.000269146	136.21	85.404	123.86	-0.50964	3471100000	0.0629471	0.104414	0.275432	P49006
0.965022	1.01163	1.05315	1.01483	1.01069	1.03074	1.03508	0.979433	0.964672	0.965266	1.01931	1.03271	1.01882	0.959852	1.02136	1.0432	1.04017	1.03276	0.872442	0.946416	1.03237	1.08022	1.03382	1.08347	S	84	3	___1	14-3-3 domain binding motif;Calmodulin-dependent protein kinase II substrate motif;Casein kinase II substrate motif;DNA dependent Protein kinase substrate motif;Phosphorylase kinase substrate motif;Pim1 kinase substrate sequence;PKA kinase substrate motif;PKC epsilon kinase substrate motif;PKC kinase substrate motif	+	CST;HTP	anatomical structure development;biological regulation;biosynthetic process;cell development;cellular biosynthetic process;cellular component assembly;cellular component assembly at cellular level;cellular component organization;cellular component organization at cellular level;cellular component organization or biogenesis;cellular component organization or biogenesis at cellular level;cellular d…	adenyl nucleotide binding;adenyl ribonucleotide binding;ATP binding;ATPase activity;ATPase activity, coupled;binding;catalytic activity;cation binding;chromatin binding;chromo shadow domain binding;DNA binding;DNA helicase activity;DNA translocase activity;DNA-dependent ATPase activity;helicase activity;histone binding;hydrolase activity;hydrolase activity, acting on acid anhydrides;hydrolase act…	cell part;chromatin;chromatin remodeling complex;chromosomal part;heterochromatin;intracellular membrane-bounded organelle;intracellular organelle;intracellular organelle part;intracellular part;macromolecular complex;membrane-bounded organelle;nuclear body;nuclear chromatin;nuclear chromosome part;nuclear heterochromatin;nuclear part;nucleoplasm;nucleoplasm part;nucleus;organelle;organelle part;…		3D-structure;Acetylation;Alternativesplicing;ATP-binding;Chromatinregulator;Chromosome;Completeproteome;Diseasemutation;DNA-binding;DNAdamage;DNArepair;Helicase;Hydrolase;Mentalretardation;Metal-binding;Nucleotide-binding;Nucleus;Phosphoprotein;Polymorphism;Referenceproteome;Telomere;Transcription;Transcriptionregulation;Zinc;Zinc-finger	ATRX-DAXX complex	PS51192;PS51194;PS51533	ADD;HELICASE_ATP_BIND_1;HELICASE_CTER	0.999989	0.000619669	111.86	56.455	91.937	0.18465	625090000	0.908741	0.136333	0.276416	P46100
1.00722	1.04329	1.01023	1.01545	1.03175	1.02807	1.02	1.01536	1.03148	0.983181	1.02052	0.993844	1.01555	0.969588	1.0236	1.02455	1.05948	1.04374	1.0523	1.02689	1.03957	1.01461	1.00913	0.993899	S	184	3	___1	Cdc2 kinase substrate motif;CDK kinase substrate motif;CDK1,2,4,6 kinase substrate motif;ERK1,2 kinase substrate motif;Growth associated histone HI kinase substrate motif;GSK-3, ERK1, ERK2, CDK5 substrate motif;MDC1 BRCT domain binding motif;Plk1 PBD domain binding motif;WW domain binding motif	+	CST;HTP		enzyme activator activity;enzyme regulator activity;GTPase activator activity;GTPase regulator activity;nucleoside-triphosphatase regulator activity			Alternativesplicing;Completeproteome;GTPaseactivation;Polymorphism;Referenceproteome		PS50086	TBC_RABGAP	0.965284	0.000741993	75.102	58.878	71.558	-0.13557	282830000	0.0334369	0.403435	0.277285	Q9NVG8
0.970716	1.00067	1.02062	1.01327	1.00059	1.01393	1.01285	1.00233	1.0387	0.974857	1.01069	1.01709	1.05749	0.956858	1.00415	1.02514	1.03392	1.01485	0.969652	1.06044	1.09355	1.0877	1.02677	1.13143	S	93	4	___1	Casein kinase II substrate motif;ERK1,2 kinase substrate motif;Growth associated histone HI kinase substrate motif;GSK-3, ERK1, ERK2, CDK5 substrate motif;PKA kinase substrate motif;WW domain binding motif	+	CST;HTP	biological regulation;cellular component assembly;cellular component organization;cellular component organization or biogenesis;macromolecular complex assembly;macromolecular complex subunit organization;protein complex assembly;protein complex subunit organization;protein oligomerization;regulation of biological process;regulation of cellular metabolic process;regulation of cellular process;regu…		actin cytoskeleton;adherens junction;anchoring junction;cell junction;cell part;cell-cell contact zone;cell-cell junction;cell-substrate adherens junction;cell-substrate junction;contractile fiber part;costamere;cytoplasm;cytoplasmic part;cytoskeleton;cytosol;extracellular membrane-bounded organelle;extracellular organelle;extracellular region part;extracellular vesicular exosome;focal adhesion;i…		3D-structure;Acetylation;Alternativesplicing;Completeproteome;Nucleus;Phosphoprotein;Polymorphism;Referenceproteome;Repeat	DNA ligase IV-XRCC4-AHNK complex	PS50106	PDZ	1	3.76581e-22	212.69	177.42	135.29	-1.1024	45017000000	0.0793257	0.256331	0.277541	Q09666
0.95116	0.993048	1.02988	1.00655	0.982314	1.01518	1.02491	0.961794	0.974277	0.97242	1.01088	1.02409	1.01791	0.951834	1.01126	1.0265	1.08099	1.04602	0.951044	0.982355	1.1792	1.03144	1.04974	1.08923	S	125	3	___1	14-3-3 domain binding motif;Akt kinase substrate motif;Calmodulin-dependent protein kinase II substrate motif;Casein kinase II substrate motif;DNA dependent Protein kinase substrate motif;ERK1,2 kinase substrate motif;GSK-3, ERK1, ERK2, CDK5 substrate motif;MAPKAPK1 kinase substrate motif;PAK2 kinase substrate motif;PKA kinase substrate motif;PKC epsilon kinase substrate motif;PKC kinase substrat…	+	CST;HTP			cell part;cytoplasm;cytoskeleton;intracellular non-membrane-bounded organelle;intracellular organelle;intracellular part;non-membrane-bounded organelle;organelle		Acetylation;Actin-binding;Alternativesplicing;Completeproteome;Cytoplasm;Cytoskeleton;Phosphoprotein;Polymorphism;Referenceproteome				0.999999	0.000872301	68.576	51.46	68.576	-0.27018	283070000	0.0867927	0.28094	0.278329	Q6NYC8
0.930715	1.00712	1.02969	0.984809	0.961441	1.01109	1.02227	0.949781	1.00868	0.991379	1.00858	1.02421	1.00553	0.984486	1.01292	1.0298	0.998574	1.02166	1.05835	0.965503	0.960507	0.934104	0.991635	0.994032	S	1383	2	___1	Casein kinase II substrate motif;DNA dependent Protein kinase substrate motif;ERK1,2 kinase substrate motif;G protein-coupled receptor kinase 1 substrate motif;GSK-3, ERK1, ERK2, CDK5 substrate motif;MAPKAPK2 kinase substrate motif;PKA kinase substrate motif;PKC kinase substrate motif;WW domain binding motif	+	CST;HTP	biological regulation;cell cycle;cell cycle process;cell division;cell proliferation;cellular component organization;cellular component organization at cellular level;cellular component organization or biogenesis;cellular component organization or biogenesis at cellular level;cellular process;chromosome organization;mitotic cell cycle;mitotic sister chromatid cohesion;negative regulation of biolo…	adenyl nucleotide binding;adenyl ribonucleotide binding;ATP binding;binding;DNA binding;nucleic acid binding;nucleotide binding;purine nucleotide binding;purine ribonucleoside triphosphate binding;purine ribonucleotide binding;ribonucleotide binding	cell part;chromatin;chromosomal part;chromosome;chromosome, centromeric region;cytoplasmic part;cytosol;intracellular membrane-bounded organelle;intracellular non-membrane-bounded organelle;intracellular organelle;intracellular organelle part;intracellular part;membrane-bounded organelle;non-membrane-bounded organelle;nuclear part;nucleoplasm;nucleus;organelle;organelle part		Acetylation;Alternativesplicing;Cellcycle;Celldivision;Completeproteome;Mitosis;Nucleus;Phosphoprotein;Referenceproteome;Repeat	CDCA5-PDS5A-RAD21-SMC1A-PDS5B-SMC3 complex;Sororin-cohesin complex			0.997401	1.60927e-06	139.38	110.29	139.38	-0.95476	1497100000	0.380152	0.277696	0.27891	Q9NTI5
1.01192	0.948384	0.989044	1.05861	1.07504	0.994892	0.974543	1.08641	0.969428	0.990516	0.956077	0.980578	1.00702	1.00274	0.978936	1.03521	1.07206	1.00059	1.05032	0.937661	1.02065	0.923524	0.992981	0.924942	S	1525	2	___1	b-Adrenergic Receptor kinase substrate motif;Casein kinase II substrate motif;Pyruvate dehydrogenase kinase substrate motif	+	CST;HTP;LTP	apoptotic chromosome condensation;biological regulation;cell cycle;cell cycle process;cell differentiation;cell division;cellular component organization;cellular component organization at cellular level;cellular component organization or biogenesis;cellular component organization or biogenesis at cellular level;cellular developmental process;cellular macromolecule metabolic process;cellular metab…	adenyl nucleotide binding;adenyl ribonucleotide binding;ATP binding;ATPase activity;ATPase activity, coupled;binding;catalytic activity;cation binding;chromatin binding;DNA bending activity;DNA binding;DNA topoisomerase (ATP-hydrolyzing) activity;DNA topoisomerase activity;DNA-dependent ATPase activity;drug binding;enzyme binding;histone deacetylase binding;hydrolase activity;hydrolase activity, …	cell part;chromosome;condensed chromosome;cytoplasm;DNA topoisomerase complex (ATP-hydrolyzing);intracellular membrane-bounded organelle;intracellular non-membrane-bounded organelle;intracellular organelle;intracellular organelle part;intracellular part;macromolecular complex;membrane-bounded organelle;non-membrane-bounded organelle;nuclear part;nucleolus;nucleoplasm;nucleus;organelle;organelle p…		3D-structure;Acetylation;Alternativesplicing;ATP-binding;Biologicalrhythms;Completeproteome;Cytoplasm;Directproteinsequencing;DNA-binding;Isomerase;Magnesium;Metal-binding;Nucleotide-binding;Nucleus;Phosphoprotein;Polymorphism;Referenceproteome;Topoisomerase	CDC5L complex;CTCF-nucleophosmin-PARP-HIS-KPNA-LMNA-TOP complex;Toposome	PS00177;PS50880	TOPOISOMERASE_II;TOPRIM	1	1.83004e-10	193.82	188.62	147.2	0.52335	4595500000	0.47878	0.553163	0.280337	P11388
1.01173	0.983496	1.00302	1.07138	1.04272	1.02335	0.995901	1.05779	0.954251	0.990043	0.961659	0.994474	1.01726	0.994653	1.00523	1.0168	1.09785	0.998949	1.07365	0.981147	1.08535	0.901032	0.999725	0.908467	S	239	3	___1	Casein kinase II substrate motif;PKA kinase substrate motif	+	CST;HTP	biological regulation;biosynthetic process;cell differentiation;cellular biosynthetic process;cellular developmental process;cellular macromolecule biosynthetic process;cellular macromolecule metabolic process;cellular metabolic process;cellular nitrogen compound metabolic process;cellular process;cellular response to stimulus;cellular response to stress;developmental process;DNA metabolic proces…	binding;nucleotide binding	catalytic step 2 spliceosome;cell part;cytoplasmic part;cytosol;extracellular membrane-bounded organelle;extracellular organelle;extracellular region part;extracellular vesicular exosome;intracellular membrane-bounded organelle;intracellular organelle;intracellular organelle part;intracellular part;macromolecular complex;membrane;membrane-bounded organelle;membrane-bounded vesicle;nuclear body;nu…	mRNA surveillance pathway;RNA transport;Spliceosome	3D-structure;Acetylation;Chaperone;Citrullination;Completeproteome;Cytoplasm;Directproteinsequencing;Host-virusinteraction;Methylation;mRNAprocessing;mRNAsplicing;mRNAtransport;Nucleus;Phosphoprotein;Referenceproteome;RNA-binding;Spliceosome;Transport	C complex spliceosome;Exon junction complex;Spliceosome;Splicing-associated factors complex;TREX complex	PS50102	RRM	1	4.36413e-39	231.62	191.6	129.2	-0.508	255480000	0.334747	0.892929	0.280645	Q86V81
1.06049	1.01936	1.01757	1.06719	1.11288	1.0192	1.01581	1.14695	1.00594	0.996983	0.997703	0.943402	0.9901	0.991661	1.0103	0.96083	1.04971	1.02825	1.0152	1.02955	1.02658	0.994123	0.990072	0.994116	S	995	2	___1	Casein kinase II substrate motif;ERK1,2 kinase substrate motif;GSK-3, ERK1, ERK2, CDK5 substrate motif;MDC1 BRCT domain binding motif;PKA kinase substrate motif;Plk1 PBD domain binding motif;WW domain binding motif	+	HTP		binding;calcium ion binding;cation binding;enzyme activator activity;enzyme regulator activity;GTPase activator activity;GTPase regulator activity;ion binding;metal ion binding;nucleoside-triphosphatase regulator activity	cell part;integral to membrane;intrinsic to membrane;membrane part		Alternativesplicing;Completeproteome;GTPaseactivation;Membrane;Phosphoprotein;Polymorphism;Referenceproteome;Repeat;Transmembrane;Transmembranehelix		PS50086;PS50222	EF_HAND_2;TBC_RABGAP	0.997834	8.05523e-06	125.98	83.872	125.98	0.22951	427310000	0.00314	0.774175	0.280799	Q66K14
1.01458	1.01554	1.01318	1.00198	1.03815	1.01926	1.01451	1.01449	1.12651	1.00532	0.980992	0.98506	1.05656	0.988407	1.00165	0.991546	1.04644	1.02512	1.0135	0.979775	1.08261	1.12101	1.00493	0.98704	T	474	4	___1	Calmodulin-dependent protein kinase II substrate motif;Pim1 kinase substrate sequence;PKA kinase substrate motif;PKC kinase substrate motif	+	CST;HTP	biosynthetic process;cellular biosynthetic process;cellular lipid metabolic process;cellular metabolic process;cellular process;glycerolipid biosynthetic process;glycerolipid metabolic process;glycerophospholipid biosynthetic process;glycerophospholipid metabolic process;lipid biosynthetic process;lipid metabolic process;metabolic process;organophosphate metabolic process;phospholipid biosyntheti…	1-acylglycerol-3-phosphate O-acyltransferase activity;acylglycerol O-acyltransferase activity;catalytic activity;O-acyltransferase activity;transferase activity;transferase activity, transferring acyl groups;transferase activity, transferring acyl groups other than amino-acyl groups	cell part;cytoplasmic part;endoplasmic reticulum membrane;endoplasmic reticulum part;integral to membrane;intracellular organelle part;intracellular part;intrinsic to membrane;membrane;membrane part;organelle membrane;organelle part	Glycerolipid metabolism;Glycerophospholipid metabolism	Acyltransferase;Completeproteome;Lipidbiosynthesis;Lipidmetabolism;Membrane;Phospholipidbiosynthesis;Phospholipidmetabolism;Polymorphism;Referenceproteome;Transferase;Transmembrane;Transmembranehelix				0.999935	6.68316e-09	147.1	123.19	93.226	0.59394	206860000	0.482225	0.447678	0.280855	Q6ZWT7
0.994122	1.01024	1.03123	1.01546	1.02393	1.0243	1.02938	1.02351	1.0459	0.998566	0.995492	1.00446	1.01806	0.985829	1.00587	1.03382	1.03846	1.00638	0.933128	1.02093	1.10068	1.04676	1.00003	1.00668	S	1342	3	___1	14-3-3 domain binding motif;Aurora-A kinase substrate motif;Calmodulin-dependent protein kinase II substrate motif;Casein kinase II substrate motif;MAPKAPK2 kinase substrate motif;PAK2 kinase substrate motif;Phosphorylase kinase substrate motif;PKA kinase substrate motif;PKC epsilon kinase substrate motif;PKC kinase substrate motif	+	CST;HTP	anatomical structure morphogenesis;biological regulation;biosynthetic process;cellular biosynthetic process;cellular component organization;cellular component organization at cellular level;cellular component organization or biogenesis;cellular component organization or biogenesis at cellular level;cellular macromolecule biosynthetic process;cellular macromolecule metabolic process;cellular metab…	acetylcholine receptor regulator activity;adenyl nucleotide binding;adenyl ribonucleotide binding;ATP binding;binding;catalytic activity;cation binding;chromatin binding;histone acetyl-lysine binding;histone binding;histone kinase activity;ion binding;kinase activity;metal ion binding;non-membrane spanning protein tyrosine kinase activity;nucleotide binding;phosphotransferase activity, alcohol gr…	cell part;centromeric heterochromatin;chromatin;chromosomal part;chromosome;condensed chromosome;heterochromatin;intracellular membrane-bounded organelle;intracellular non-membrane-bounded organelle;intracellular organelle;intracellular organelle part;intracellular part;membrane-bounded organelle;non-membrane-bounded organelle;nucleus;organelle;organelle part		3D-structure;Acetylation;Alternativesplicing;ATP-binding;Bromodomain;Coiledcoil;Completeproteome;DNAdamage;Kinase;Metal-binding;Nucleotide-binding;Nucleus;Phosphoprotein;Referenceproteome;Transcription;Transcriptionregulation;Transferase;Tyrosine-proteinkinase;Williams-Beurensyndrome;Zinc;Zinc-finger	WICH complex;WINAC complex	PS00633;PS01359;PS50014;PS50016;PS50827;PS51136	BROMODOMAIN_1;BROMODOMAIN_2;DDT;WAC;ZF_PHD_1;ZF_PHD_2	1	0.00023996	127.83	75.904	83.081	0.47691	370990000	0.7892	0.151362	0.283022	Q9UIG0
0.970004	1.00988	1.0396	1.02695	1.00093	1.02905	1.03462	0.982759	0.936138	0.97904	0.98046	0.995637	0.9753	0.973002	1.00145	1.04234	1.09618	0.997661	1.15032	0.922337	1.06147	0.841861	0.987787	0.967661	S	760	3	___1	Casein kinase II substrate motif;ERK1,2 kinase substrate motif;GSK-3, ERK1, ERK2, CDK5 substrate motif;WW domain binding motif	+	HTP	biological regulation;cellular process;cellular response to stimulus;intracellular signal transduction;positive regulation of defense response to virus by host;regulation of biological process;regulation of cellular process;regulation of defense response;regulation of defense response to virus;regulation of defense response to virus by host;regulation of immune effector process;regulation of immu…	enzyme activator activity;enzyme regulator activity;GTPase activator activity;GTPase regulator activity;nucleoside-triphosphatase regulator activity	cell part;cytoplasmic part;cytosol;intracellular part		Alternativesplicing;Completeproteome;GTPaseactivation;Polymorphism;Referenceproteome		PS50238	RHOGAP	0.997103	9.43894e-07	126.16	106.41	126.16	0.27001	46513000	0.665098	0.570447	0.283204	Q9NYF5
0.966463	1.0191	1.03395	1.00058	1.00102	1.02752	1.02671	0.991853	1.01862	0.97256	1.01165	0.999234	1.01364	0.98269	1.01744	1.01432	1.05188	1.02491	0.978636	0.991363	1.05429	1.05952	1.04411	1.06231	S	2039	4	___1	14-3-3 domain binding motif;AMP-activated protein kinase substrate motif;Calmodulin-dependent protein kinase II substrate motif;Casein kinase II substrate motif;HMGCoA Reductase kinase substrate motif;PKA kinase substrate motif;PKA, PKG kinase substrate motif;PKC epsilon kinase substrate motif;PKC kinase substrate motif;PKG kinase substrate motif	+	HTP	apoptosis;cell death;cell junction assembly;cell junction organization;cell-substrate junction assembly;cellular component assembly;cellular component assembly at cellular level;cellular component disassembly;cellular component disassembly at cellular level;cellular component disassembly involved in apoptosis;cellular component organization;cellular component organization at cellular level;cellul…	ankyrin binding;binding;cytoskeletal protein binding;protein binding;structural constituent of muscle;structural molecule activity	adherens junction;anchoring junction;cell junction;cell part;cell-substrate adherens junction;cell-substrate junction;contractile fiber part;costamere;cytoplasm;cytoplasmic part;cytoskeleton;cytosol;extracellular membrane-bounded organelle;extracellular organelle;extracellular region part;extracellular vesicular exosome;focal adhesion;hemidesmosome;intermediate filament cytoskeleton;intracellular…		3D-structure;Acetylation;Actin-binding;Alternativesplicing;Celljunction;Coiledcoil;Completeproteome;Cytoplasm;Cytoskeleton;Directproteinsequencing;Diseasemutation;Epidermolysisbullosa;Limb-girdlemusculardystrophy;Phosphoprotein;Polymorphism;Referenceproteome;Repeat		PS00019;PS00020;PS50021	ACTININ_1;ACTININ_2;CH	0.98966	1.26506e-07	143.64	106.79	121.42	0.34655	2151500000	0.107182	0.125749	0.284333	Q15149
0.891687	0.992735	1.01746	1.01979	0.908246	0.964095	1.01715	0.949193	1.10092	0.984531	0.995003	1.05474	1.10602	0.959263	1.00273	1.06482	1.04905	1.02483	1.02035	0.98971	1.08044	1.14606	1.03355	1.07986	S	2041	3	___1	Casein kinase II substrate motif;G protein-coupled receptor kinase 1 substrate motif;Pyruvate dehydrogenase kinase substrate motif	+	CST;HTP	actin cytoskeleton organization;actin filament-based process;actomyosin structure organization;asymmetric Golgi ribbon formation;biological regulation;cell migration;cell motility;cellular component movement;cellular component organization;cellular component organization at cellular level;cellular component organization or biogenesis;cellular component organization or biogenesis at cellular level…	actin binding;actin filament binding;adenyl nucleotide binding;adenyl ribonucleotide binding;ADP binding;ATP binding;binding;catalytic activity;cytoskeletal protein binding;DNA binding;hydrolase activity;hydrolase activity, acting on acid anhydrides;hydrolase activity, acting on acid anhydrides, in phosphorus-containing anhydrides;motor activity;nucleic acid binding;nucleoside-triphosphatase acti…	actomyosin;cell part;cytoplasmic part;cytoskeletal part;endoplasmic reticulum-Golgi intermediate compartment;Golgi apparatus part;Golgi membrane;intracellular membrane-bounded organelle;intracellular organelle;intracellular organelle part;intracellular part;macromolecular complex;membrane;membrane-bounded organelle;myosin complex;organelle;organelle membrane;organelle part;protein complex;trans-G…		Alternativesplicing;ATP-binding;Coiledcoil;Completeproteome;Cytoplasm;Cytoskeleton;Golgiapparatus;Motorprotein;Myosin;Nucleotide-binding;Phosphoprotein;Polymorphism;Referenceproteome		PS50096;PS50106;PS51456	IQ;MYOSIN_MOTOR;PDZ	0.999263	1.95607e-26	184.96	168.63	130.01	-2.0337	195090000	0.0206984	0.675754	0.284451	Q92614
1.01099	0.996292	0.998675	1.04921	1.05067	1.01545	0.990073	1.05276	0.989683	0.990958	0.961276	0.982316	0.986618	0.999245	0.992426	1.02389	1.08257	1.00966	1.09272	0.99407	1.05402	0.978733	1.01295	0.954804	S	855	3	___1	b-Adrenergic Receptor kinase substrate motif;Casein kinase II substrate motif;G protein-coupled receptor kinase 1 substrate motif	+	HTP	anatomical structure formation involved in morphogenesis;angiogenesis;biological regulation;biosynthetic process;cell differentiation;cellular biosynthetic process;cellular developmental process;cellular macromolecule biosynthetic process;cellular macromolecule metabolic process;cellular metabolic process;cellular nitrogen compound metabolic process;cellular process;cellular protein metabolic pro…	acetyltransferase activity;binding;catalytic activity;N-acetyltransferase activity;N-acyltransferase activity;ribonucleoprotein binding;ribosome binding;transferase activity;transferase activity, transferring acyl groups;transferase activity, transferring acyl groups other than amino-acyl groups	cell part;cytoplasm;cytoplasmic part;intracellular membrane-bounded organelle;intracellular organelle;intracellular organelle part;intracellular part;macromolecular complex;membrane;membrane-bounded organelle;NatA complex;N-terminal protein acetyltransferase complex;nuclear part;nucleoplasm part;nucleus;organelle;organelle part;protein acetyltransferase complex;protein complex;transcription facto…		Acetylation;Alternativesplicing;Angiogenesis;Completeproteome;Cytoplasm;Developmentalprotein;Differentiation;Nucleus;Phosphoprotein;Referenceproteome;Repeat;TPRrepeat;Transcription;Transcriptionregulation	ARD1-NATH complex;Ku antigen-NARG1 complex	PS50005;PS50293	TPR;TPR_REGION	0.985428	5.80632e-31	214.41	181.81	168.99	-0.023637	689280000	0.048805	0.935768	0.284906	Q9BXJ9
0.923492	1.01442	1.02231	1.00837	0.930762	1.01479	1.01919	0.910151	1.01122	0.986896	1.00535	1.05636	1.03198	0.969655	1.00936	1.08723	1.05779	1.02181	0.9432	0.892588	1.13028	1.01169	1.00648	1.0301	S	46	3	___1	Casein kinase I substrate motif;MAPKAPK2 kinase substrate motif	+	HTP	biological regulation;biosynthetic process;catabolic process;cellular biosynthetic process;cellular catabolic process;cellular macromolecule biosynthetic process;cellular macromolecule catabolic process;cellular macromolecule metabolic process;cellular metabolic process;cellular nitrogen compound metabolic process;cellular process;establishment of localization;establishment of localization in cel…	binding;mRNA binding;nucleic acid binding;nucleotide binding;RNA binding	catalytic step 2 spliceosome;cell part;cytoplasm;cytoplasmic part;cytosol;exon-exon junction complex;intracellular membrane-bounded organelle;intracellular organelle;intracellular organelle part;intracellular part;macromolecular complex;membrane-bounded organelle;nuclear body;nuclear part;nuclear speck;nucleoplasm;nucleoplasm part;nucleus;organelle;organelle part;protein complex;ribonucleoprotein…	mRNA surveillance pathway;RNA transport;Spliceosome	3D-structure;Acetylation;Alternativesplicing;Completeproteome;Cytoplasm;mRNAprocessing;mRNAsplicing;mRNAtransport;Nonsense-mediatedmRNAdecay;Nucleus;Phosphoprotein;Referenceproteome;RNA-binding;Spliceosome;Translationregulation;Transport	C complex spliceosome;Exon junction complex;Exon junction complex (EIF4A3-MLN51-MAGOH-Y14);Exon junction complex (EIF4A3-MLN51-MAGOH-Y14), RNA-protein complex;Exon junction complex (EIF4A3-MLN51-UPF3B-MAGOH-Y14);Exon junction complex (F4A3-MLN51-UPF3B-MAGOH-Y14-PYM);Exon junction complex, EIF4A3-MLN51-MAGOH-Y14 (RNA-protein complex);IPO13-RBM8A-MAGOH complex;Postsplicing complex;Spliceosome;Splic…	PS50102	RRM	0.999999	5.68103e-06	134.2	117.87	122.39	-0.010434	817580000	0.365509	0.506172	0.285618	Q9Y5S9
0.996169	1.01351	1.00629	1.01228	1.0128	1.04268	1.01528	0.952437	1.05646	1.0098	1.00731	1.08919	1.04763	1.01803	1.02869	1.12527	1.05079	1.02156	0.964732	0.985955	1.11329	1.07657	1.01543	1.02953	S	409	3	___1	Casein kinase II substrate motif;ERK1,2 kinase substrate motif;Growth associated histone HI kinase substrate motif;GSK-3, ERK1, ERK2, CDK5 substrate motif;WW domain binding motif	+	CST;HTP	cellular macromolecule metabolic process;cellular metabolic process;cellular process;cellular protein metabolic process;macromolecule metabolic process;macromolecule modification;metabolic process;primary metabolic process;protein acylation;protein lipidation;protein metabolic process;protein modification process;protein palmitoylation	binding;catalytic activity;cation binding;ion binding;metal ion binding;palmitoyltransferase activity;protein-cysteine S-acyltransferase activity;protein-cysteine S-palmitoleyltransferase activity;S-acyltransferase activity;transferase activity;transferase activity, transferring acyl groups;transferase activity, transferring acyl groups other than amino-acyl groups;transition metal ion binding;zi…	cell part;cell projection;dendrite;integral to membrane;intrinsic to membrane;membrane;membrane part;neuron projection;plasma membrane		Acyltransferase;Alternativesplicing;Cellmembrane;Completeproteome;Membrane;Metal-binding;Phosphoprotein;Referenceproteome;Transferase;Transmembrane;Transmembranehelix;Zinc;Zinc-finger		PS50216	ZF_DHHC	0.991535	1.25454e-33	228.58	202.22	228.58	0.099033	360680000	0.127453	0.174671	0.286161	Q9C0B5
0.991201	1.04059	1.0172	1.0711	1.00897	1.07771	1.04589	0.996873	1.09256	0.991989	0.940175	1.08444	1.05062	0.999673	0.987096	1.10513	1.064	0.977774	0.99396	1.02872	1.10638	1.04071	1.13882	1.01483	S	163	3	___1	14-3-3 domain binding motif;Calmodulin-dependent protein kinase II substrate motif;MAPKAPK1 kinase substrate motif;PKA kinase substrate motif;PKC kinase substrate motif	+	HTP;LTP	biological regulation;catabolic process;cellular catabolic process;cellular macromolecule catabolic process;cellular macromolecule metabolic process;cellular metabolic process;cellular process;establishment of localization;establishment of protein localization;macromolecule catabolic process;macromolecule metabolic process;metabolic process;modification-dependent macromolecule catabolic process;m…	binding;lipid binding;protein binding;small conjugating protein binding;ubiquitin binding	aggresome;cell part;centrosome;cytoplasm;cytoplasmic part;cytoskeletal part;cytosol;endosomal part;endosome membrane;ESCRT I complex;extracellular membrane-bounded organelle;extracellular organelle;extracellular region part;extracellular vesicular exosome;inclusion body;intracellular membrane-bounded organelle;intracellular non-membrane-bounded organelle;intracellular organelle;intracellular orga…	Endocytosis	Alternativesplicing;Completeproteome;Cytoplasm;Cytoskeleton;Endosome;Membrane;Nucleus;Phosphoprotein;Polymorphism;Proteintransport;Referenceproteome;SH3-binding;Transport		PS51497;PS51498	MABP;UMA	0.999825	3.3902e-08	121.74	108.28	121.74	-2.1787	61573000	0.712567	0.222981	0.288771	Q96EY5
1.00687	1.03428	1.01107	1.02731	0.959221	1.01398	1.00648	0.975703	0.975442	0.989738	1.01938	1.04667	0.936888	0.996497	1.00777	1.04191	1.02855	1.02984	0.964254	0.918399	1.02477	1.06452	0.965338	0.993263	S	781	2	___1	Casein kinase II substrate motif;Cdc2 kinase substrate motif;CDK kinase substrate motif;CDK1,2,4,6 kinase substrate motif;DNA dependent Protein kinase substrate motif;ERK1,2 kinase substrate motif;GSK-3, ERK1, ERK2, CDK5 substrate motif;WW domain binding motif	+	CST;HTP	biological regulation;biosynthetic process;carbohydrate metabolic process;carbohydrate transport;cell cycle;cell cycle process;cell surface receptor linked signaling pathway;cellular biosynthetic process;cellular component disassembly;cellular component disassembly at cellular level;cellular component organization;cellular component organization at cellular level;cellular component organization o…	binding;catalytic activity;cation binding;cis-trans isomerase activity;enzyme binding;GTPase binding;ion binding;isomerase activity;ligase activity;metal ion binding;nucleic acid binding;peptidyl-prolyl cis-trans isomerase activity;protein binding;Ran GTPase binding;Ras GTPase binding;RNA binding;small GTPase binding;transition metal ion binding;zinc ion binding	cell part;cytoplasmic part;cytosol;inclusion body;intracellular membrane-bounded organelle;intracellular organelle;intracellular organelle part;intracellular part;macromolecular complex;membrane;membrane part;membrane-bounded organelle;mitochondrion;nuclear inclusion body;nuclear membrane;nuclear part;nuclear pore;organelle;organelle membrane;organelle part;pore complex;protein complex	RNA transport	3D-structure;Acetylation;Completeproteome;Disulfidebond;Isopeptidebond;Ligase;Membrane;Metal-binding;mRNAtransport;Nuclearporecomplex;Nucleus;Phosphoprotein;Polymorphism;Proteintransport;Referenceproteome;Repeat;RNA-binding;TPRrepeat;Translocation;Transport;Ublconjugation;Ublconjugationpathway;Zinc;Zinc-finger	Nuclear pore complex	PS00170;PS01358;PS50005;PS50072;PS50196;PS50199;PS50293	CSA_PPIASE_1;CSA_PPIASE_2;RANBD1;TPR;TPR_REGION;ZF_RANBP2_1;ZF_RANBP2_2	0.990946	2.08639e-05	91.265	67.497	91.265	-0.16042	127840000	0.968968	0.761112	0.289838	P49792
1.03341	1.00626	1.01541	1.04912	1.08234	1.01728	1.00878	1.01998	0.960857	0.985392	0.984268	0.984068	0.986655	0.995206	0.995781	1.02217	1.10085	1.01256	1.08273	0.964612	1.0576	0.935954	1.00178	0.942592	S	55	3	___1	MAPKAPK2 kinase substrate motif	+	CST;HTP;LTP	actin filament-based movement;actin filament-based process;actin-mediated cell contraction;actin-myosin filament sliding;anatomical structure development;apoptosis;astrocyte development;astrocyte differentiation;Bergmann glial cell differentiation;biological regulation;cell death;cell development;cell differentiation;cellular component disassembly;cellular component disassembly at cellular level;…	binding;double-stranded RNA binding;glycoprotein binding;identical protein binding;nucleic acid binding;protein binding;protein C-terminus binding;RNA binding;scaffold protein binding;structural constituent of cytoskeleton;structural constituent of eye lens;structural molecule activity	adherens junction;anchoring junction;cell junction;cell leading edge;cell part;cell projection;cell-substrate adherens junction;cell-substrate junction;cytoplasm;cytoplasmic part;cytoskeletal part;cytoskeleton;cytosol;extracellular membrane-bounded organelle;extracellular organelle;extracellular region part;extracellular vesicular exosome;focal adhesion;intermediate filament;intermediate filament…		3D-structure;Acetylation;Cataract;Coiledcoil;Completeproteome;Cytoplasm;Directproteinsequencing;Diseasemutation;Glycoprotein;Host-virusinteraction;Intermediatefilament;Phosphoprotein;Referenceproteome;S-nitrosylation		PS00226	IF	0.84262	2.15605e-22	212.69	176.27	77.658	-1.05	2688400000	0.117767	0.818524	0.290227	P08670
0.967965	0.997126	1.01521	1.0132	0.998209	1.01061	1.00766	1.02796	1.00855	0.99579	1.00024	0.984359	1.02835	0.979409	1.01139	1.00091	1.05702	1.02888	0.931432	1.00654	1.08647	1.084	1.01244	1.02232	S	547	4	___1	14-3-3 domain binding motif;Akt kinase substrate motif;Calmodulin-dependent protein kinase II substrate motif;Casein kinase II substrate motif;ERK1,2 kinase substrate motif;G protein-coupled receptor kinase 1 substrate motif;GSK-3, ERK1, ERK2, CDK5 substrate motif;MAPKAPK1 kinase substrate motif;Pim1 kinase substrate sequence;PKA kinase substrate motif;PKC epsilon kinase substrate motif;PKC kinas…	+	CST;HTP	biological regulation;development of secondary female sexual characteristics;development of secondary sexual characteristics;developmental process;developmental process involved in reproduction;negative regulation of biological process;negative regulation of biosynthetic process;negative regulation of cellular biosynthetic process;negative regulation of cellular macromolecule biosynthetic process…	binding;cation binding;ion binding;metal ion binding	cell part;extracellular region part;extracellular space;intracellular membrane-bounded organelle;intracellular organelle;intracellular organelle part;intracellular part;membrane-bounded organelle;nuclear part;nucleoplasm;nucleus;organelle;organelle part		3D-structure;Coiledcoil;Completeproteome;Metal-binding;Nucleus;Phosphoprotein;Polymorphism;Referenceproteome;Tripletrepeatexpansion;Zinc;Zinc-finger				1	4.47617e-23	199.97	169.84	181.92	-0.24624	3578900000	0.180398	0.10126	0.290253	Q9H1B7
0.971922	1.00364	1.00287	1.06566	1.02355	1.03281	0.994171	1.03213	0.99139	0.99897	0.974767	1.02027	1.00203	0.998709	1.00181	1.03621	1.05911	1.00985	1.06231	0.97591	1.03548	0.93123	1.00123	0.973396	S	727	3	___1	Casein kinase II substrate motif;ERK1,2 kinase substrate motif;GSK-3, ERK1, ERK2, CDK5 substrate motif;WW domain binding motif	+	CST;HTP;LTP	anatomical structure development;apoptosis;biological regulation;biosynthetic process;blood circulation;cell death;cell differentiation;cell differentiation involved in kidney development;cell differentiation involved in metanephros development;cell proliferation;cell proliferation involved in kidney development;cell proliferation involved in metanephros development;cell surface receptor linked s…	binding;core promoter binding;core promoter proximal region DNA binding;core promoter proximal region sequence-specific DNA binding;core promoter sequence-specific DNA binding;cytokine receptor binding;DNA binding;double-stranded DNA binding;enzyme binding;identical protein binding;molecular transducer activity;nucleic acid binding;nucleic acid binding transcription factor activity;protein bindin…	axon;cell part;cell projection;chromatin;chromosomal part;cytoplasm;cytoplasmic part;cytosol;dendrite;intracellular membrane-bounded organelle;intracellular non-membrane-bounded organelle;intracellular organelle;intracellular organelle part;intracellular part;membrane-bounded organelle;neuron projection;non-membrane-bounded organelle;nuclear chromatin;nuclear chromosome part;nuclear part;nucleolu…	Chemokine signaling pathway;Hepatitis C;Jak-STAT signaling pathway;ko05152;Leishmaniasis;Measles;Osteoclast differentiation;Pancreatic cancer;Pathways in cancer;Toll-like receptor signaling pathway;Toxoplasmosis	3D-structure;Acetylation;Activator;Alternativesplicing;Antiviraldefense;Coiledcoil;Completeproteome;Cytoplasm;Directproteinsequencing;Diseasemutation;DNA-binding;Host-virusinteraction;Isopeptidebond;Nucleus;Phosphoprotein;Polymorphism;Referenceproteome;SH2domain;Transcription;Transcriptionregulation;Ublconjugation	Interferon-stimulated gene factor 3 transcription complex ISGF3;Stat1-alpha-dimer-CBP DNA-protein complex	PS50001	SH2	0.999991	1.47455e-09	135.55	127.07	132.36	0.2402	149110000	0.739917	0.81511	0.29036	P42224
0.969089	0.998347	1.01266	1.03106	1.00808	1.00568	1.0015	0.983175	0.957722	0.986189	0.971234	1.04174	0.979478	0.98481	0.996252	1.08141	1.07222	1.00869	1.0556	1.17953	1.06604	0.997957	1.02169	1.11309	S	4672	2	___1	Casein kinase II substrate motif	+	CST;HTP	apoptosis;cell death;cell junction assembly;cell junction organization;cell-substrate junction assembly;cellular component assembly;cellular component assembly at cellular level;cellular component disassembly;cellular component disassembly at cellular level;cellular component disassembly involved in apoptosis;cellular component organization;cellular component organization at cellular level;cellul…	ankyrin binding;binding;cytoskeletal protein binding;protein binding;structural constituent of muscle;structural molecule activity	adherens junction;anchoring junction;cell junction;cell part;cell-substrate adherens junction;cell-substrate junction;contractile fiber part;costamere;cytoplasm;cytoplasmic part;cytoskeleton;cytosol;extracellular membrane-bounded organelle;extracellular organelle;extracellular region part;extracellular vesicular exosome;focal adhesion;hemidesmosome;intermediate filament cytoskeleton;intracellular…		3D-structure;Acetylation;Actin-binding;Alternativesplicing;Celljunction;Coiledcoil;Completeproteome;Cytoplasm;Cytoskeleton;Directproteinsequencing;Diseasemutation;Epidermolysisbullosa;Limb-girdlemusculardystrophy;Phosphoprotein;Polymorphism;Referenceproteome;Repeat		PS00019;PS00020;PS50021	ACTININ_1;ACTININ_2;CH	0.984408	3.45702e-38	246.51	222.44	213.99	-0.42302	248660000	0.0315677	0.505234	0.290581	Q15149
0.956656	1.04292	0.979801	1.00168	0.946929	1.01695	1.00934	0.957079	1.062	0.963554	1.0643	0.986959	1.03285	0.958657	1.00252	1.00118	1.04177	1.0288	0.901591	1.10716	1.0522	1.1629	1.03532	1.11098	S	82	4	___1	ATM kinase substrate motif;Casein kinase I substrate motif;Casein kinase II substrate motif;DNA dependent Protein kinase substrate motif;G protein-coupled receptor kinase 1 substrate motif;PKA kinase substrate motif;PKC kinase substrate motif	+	CST;HTP	cell cycle;cell division;cellular component assembly;cellular component organization;cellular component organization or biogenesis;cellular process;macromolecular complex assembly;macromolecular complex subunit organization;metabolic process;protein complex assembly;protein complex subunit organization;protein heterooligomerization;protein oligomerization	binding;catalytic activity;GTP binding;GTPase activity;guanyl nucleotide binding;guanyl ribonucleotide binding;hydrolase activity;hydrolase activity, acting on acid anhydrides;hydrolase activity, acting on acid anhydrides, in phosphorus-containing anhydrides;nucleoside-triphosphatase activity;nucleotide binding;purine nucleotide binding;purine ribonucleoside triphosphate binding;purine ribonucleo…	actin cytoskeleton;actin filament bundle;actomyosin;cell part;cytoplasm;cytoplasmic part;cytoskeletal part;cytoskeleton;intracellular non-membrane-bounded organelle;intracellular organelle;intracellular organelle part;intracellular part;macromolecular complex;microtubule;non-membrane-bounded organelle;organelle;organelle part;perinuclear region of cytoplasm;protein complex;stress fiber		Acetylation;Alternativesplicing;Cellcycle;Celldivision;Chromosomalrearrangement;Completeproteome;Cytoplasm;Cytoskeleton;Diseasemutation;GTP-binding;Nucleotide-binding;Phosphoprotein;Polymorphism;Referenceproteome	Septin complex	PS51719	G_SEPTIN	0.94859	4.55946e-05	105	84.265	98.253	0.17396	4219400000	0.14424	0.843424	0.293364	Q9UHD8
1.00238	1.03036	0.986587	1.00627	1.0048	0.9966	1.0051	1.01574	1.07024	0.992109	0.999389	1.01249	1.02495	0.988778	1.00398	1.03151	1.05214	1.03049	0.907771	1.04039	1.07668	1.1233	0.993106	1.04169	T	19	3	___1	Casein kinase I substrate motif;Casein kinase II substrate motif;G protein-coupled receptor kinase 1 substrate motif;GSK-3, ERK1, ERK2, CDK5 substrate motif;MDC1 BRCT domain binding motif;Plk1 PBD domain binding motif;WW domain binding motif	+	CST;HTP;LTP	anatomical structure formation involved in morphogenesis;angiogenesis;biological regulation;body fluid secretion;cellular component assembly;cellular component assembly at cellular level;cellular component organization;cellular component organization at cellular level;cellular component organization or biogenesis;cellular component organization or biogenesis at cellular level;cellular membrane or…	binding;calcium ion binding;calcium-dependent phospholipid binding;calcium-dependent protein binding;cation binding;enzyme inhibitor activity;enzyme regulator activity;ion binding;lipase inhibitor activity;lipid binding;metal ion binding;phosphatidylinositol binding;phosphatidylinositol-4,5-bisphosphate binding;phospholipase A2 inhibitor activity;phospholipase inhibitor activity;phospholipid bind…	basement membrane;basolateral plasma membrane;cell cortex;cell part;cell projection;cell surface;cytoplasmic membrane-bounded vesicle;cytoplasmic part;cytoplasmic vesicle;early endosome;endosomal part;endosome;endosome membrane;extracellular matrix part;extracellular membrane-bounded organelle;extracellular organelle;extracellular region part;extracellular space;extracellular vesicular exosome;ex…		3D-structure;Acetylation;Alternativesplicing;Annexin;Basementmembrane;Calcium;Calcium/phospholipid-binding;Completeproteome;Directproteinsequencing;Extracellularmatrix;Phosphoprotein;Polymorphism;Referenceproteome;Repeat;Secreted;Ublconjugation		PS00223	ANNEXIN	0.968729	1.24802e-19	164.69	138.46	141.83	-0.26407	1239700000	0.479291	0.450495	0.293711	P07355;A6NMY6
0.946822	0.99927	1.02724	0.993388	0.988911	1.00722	1.01697	0.994462	1.02945	0.997416	1.00242	0.99173	1.007	0.982768	1.01649	0.996519	1.03283	1.02745	1.04968	0.960092	1.00977	0.938152	0.997633	0.980655	S	304	3	___1	14-3-3 domain binding motif;Akt kinase substrate motif;Calmodulin-dependent protein kinase II substrate motif;Casein kinase II substrate motif;DNA dependent Protein kinase substrate motif;ERK1,2 kinase substrate motif;G protein-coupled receptor kinase 1 substrate motif;GSK-3, ERK1, ERK2, CDK5 substrate motif;MAPKAPK1 kinase substrate motif;PKA kinase substrate motif;PKC kinase substrate motif;WW …	+	CST;HTP	ATP-dependent chromatin remodeling;biological regulation;biosynthetic process;cellular biosynthetic process;cellular component disassembly;cellular component disassembly at cellular level;cellular component organization;cellular component organization at cellular level;cellular component organization or biogenesis;cellular component organization or biogenesis at cellular level;cellular macromolec…	binding;chromatin binding;DNA binding;nucleic acid binding;protein binding transcription factor activity;transcription coactivator activity;transcription cofactor activity;transcription factor binding transcription factor activity	cell part;chromatin;chromatin remodeling complex;chromosomal part;intracellular organelle part;intracellular part;macromolecular complex;nBAF complex;npBAF complex;nuclear chromatin;nuclear chromosome part;nuclear part;nucleoplasm;organelle part;protein complex;SWI/SNF complex;SWI/SNF-type complex		Acetylation;Alternativesplicing;Chromatinregulator;Coiledcoil;Completeproteome;Neurogenesis;Nucleus;Phosphoprotein;Referenceproteome;Transcription;Transcriptionregulation	ALL-1 supercomplex;BAF complex;BRG1-associated complex;Brg1-associated complex I;Brg1-associated complex II;Brg1-based SWI/SNF chromatin remodeling complex;BRG1-SIN3A complex;BRG1-SIN3A-HDAC containing SWI/SNF remodeling complex I;Brm-associated complex;BRM-associated complex;BRM-SIN3A complex;BRM-SIN3A-HDAC complex;EBAFa complex;EBAFb complex;Emerin complex 32;LARC complex (LCR-associated remode…	PS50934;PS51293	SANT;SWIRM	0.898127	0.000532192	74.643	33.103	65.511	0.76106	163260000	0.88874	0.453027	0.293762	Q8TAQ2
0.93732	1.00069	1.00994	1.02106	0.973487	1.01568	1.00087	0.977748	1.04643	1.00461	0.996146	1.00719	1.05757	0.995458	1.0102	1.03919	1.04975	0.992077	0.899696	1.06199	1.16246	1.08213	0.989673	1.08359	S	52	2	___1	14-3-3 domain binding motif;Calmodulin-dependent protein kinase II substrate motif;Casein kinase II substrate motif;MAPKAPK1 kinase substrate motif;p70 Ribosomal S6 kinase substrate motif;Phosphorylase kinase substrate motif;PKA kinase substrate motif;PKC kinase substrate motif	+	CST;HTP		adenyl nucleotide binding;adenyl ribonucleotide binding;ATP binding;binding;endopeptidase inhibitor activity;endopeptidase regulator activity;enzyme binding;enzyme inhibitor activity;enzyme regulator activity;kinase binding;lipid binding;nucleotide binding;peptidase inhibitor activity;peptidase regulator activity;phosphatidylethanolamine binding;phospholipid binding;protein binding;protein kinase…	cell part;cytoplasm;extracellular membrane-bounded organelle;extracellular organelle;extracellular region part;extracellular vesicular exosome;intracellular membrane-bounded organelle;intracellular organelle;intracellular part;membrane-bounded organelle;membrane-bounded vesicle;nucleus;organelle;vesicle		3D-structure;ATP-binding;Completeproteome;Cytoplasm;Directproteinsequencing;Disulfidebond;Lipid-binding;Nucleotide-binding;Phosphoprotein;Proteaseinhibitor;Referenceproteome;Serineproteaseinhibitor		PS01220	PBP	0.969647	4.90238e-10	140.98	125.35	110.35	0.16376	709420000	0.265059	0.229667	0.29414	P30086
0.984237	0.993791	1.01663	1.00752	1.04844	1.00617	1.01694	1.00758	1.01044	1.01411	0.976611	0.994714	0.997631	1.0036	1.01155	1.02768	1.09325	1.03072	1.05366	0.998034	1.07965	0.990429	0.983456	0.986273	S	247	2	___1	14-3-3 domain binding motif;Calmodulin-dependent protein kinase II substrate motif;Calmodulin-dependent protein kinase IV substrate motif;Chk1 kinase substrate motif;PKA kinase substrate motif;PKC kinase substrate motif;ZIP kinase substrate motif	+	HTP;LTP	activation of immune response;activation of innate immune response;anaphase-promoting complex-dependent proteasomal ubiquitin-dependent protein catabolic process;antigen processing and presentation;antigen processing and presentation of exogenous antigen;antigen processing and presentation of exogenous peptide antigen;antigen processing and presentation of exogenous peptide antigen via MHC class …	binding;endopeptidase activator activity;endopeptidase regulator activity;enzyme activator activity;enzyme regulator activity;identical protein binding;p53 binding;peptidase activator activity;peptidase regulator activity;protein binding	cell part;cytoplasm;cytoplasmic part;cytosol;intracellular membrane-bounded organelle;intracellular organelle;intracellular organelle part;intracellular part;macromolecular complex;membrane;membrane-bounded organelle;nuclear part;nucleoplasm;nucleus;organelle;organelle part;proteasome activator complex;proteasome complex;protein complex	Antigen processing and presentation;Hepatitis C;Proteasome	Acetylation;Alternativesplicing;Apoptosis;Cellcycle;Completeproteome;Cytoplasm;Directproteinsequencing;Nucleus;Phosphoprotein;Proteasome;Referenceproteome	PA28gamma complex;PA28gamma-20S proteasome			0.899692	0.00244557	117.7	107.33	117.7	-0.19508	65024000	0.1631	0.916498	0.294718	P61289
0.948053	1.02274	0.9901	1.01358	0.936607	1.0112	1.00403	0.952501	0.995958	0.9758	1.01418	1.0616	0.994732	0.97356	0.996568	1.07378	1.08425	1.02089	0.908746	1.03252	1.11452	1.07879	1.01758	1.07051	S	1159	3	___1	Casein kinase II substrate motif	+	CST;HTP	apoptosis;biological regulation;cell death;cellular component disassembly;cellular component disassembly at cellular level;cellular component disassembly involved in apoptosis;cellular component organization;cellular component organization at cellular level;cellular component organization or biogenesis;cellular component organization or biogenesis at cellular level;cellular metabolic process;cell…	binding;binding, bridging;catalytic activity;guanylate kinase activity;kinase activity;nucleobase-containing compound kinase activity;nucleotide kinase activity;phosphotransferase activity, phosphate group as acceptor;protein binding;protein binding, bridging;protein domain specific binding;transferase activity;transferase activity, transferring phosphorus-containing groups	adherens junction;anchoring junction;cell junction;cell part;cell-cell junction;cytoplasm;cytoplasmic part;cytosol;intracellular organelle part;intracellular part;membrane;nuclear part;nucleoplasm;occluding junction;organelle part;plasma membrane;tight junction	Tight junction;Vibrio cholerae infection	3D-structure;Alternativepromoterusage;Alternativesplicing;Celljunction;Cellmembrane;Completeproteome;Diseasemutation;Intrahepaticcholestasis;Membrane;Nucleus;Phosphoprotein;Polymorphism;Referenceproteome;Repeat;SH3domain;Tightjunction		PS50002;PS50052;PS50106	GUANYLATE_KINASE_2;PDZ;SH3	0.999997	4.30132e-91	320.89	258.05	236.82	-0.43638	809460000	0.138645	0.681721	0.296829	Q9UDY2
0.93272	1.00038	1.0136	0.996971	0.987668	1.00335	1.00152	0.966672	1.09232	0.995767	0.969016	1.01275	1.0433	0.996771	0.98932	1.04597	1.05395	1.04203	0.983982	1.01998	1.05873	1.18108	1.03179	1.01198	S	242	3	___3	Casein kinase II substrate motif;G protein-coupled receptor kinase 1 substrate motif;GSK3 kinase substrate motif	+	CST;HTP;LTP	activation-induced cell death of T cells;anatomical structure development;anatomical structure morphogenesis;apoptosis;biological regulation;biosynthetic process;carbohydrate homeostasis;catabolic process;cell activation;cell activation involved in immune response;cell cycle checkpoint;cell cycle phase;cell cycle process;cell death;cell development;cell differentiation;cell proliferation;cell sur…	binding;enzyme binding;kinase binding;protein binding;protein kinase binding;structural constituent of ribosome;structural molecule activity	cell body;cell part;cell projection;cytoplasm;cytoplasmic part;cytosol;cytosolic small ribosomal subunit;dendrite;intracellular membrane-bounded organelle;intracellular non-membrane-bounded organelle;intracellular organelle;intracellular organelle part;intracellular part;macromolecular complex;membrane;membrane-bounded organelle;neuron projection;non-membrane-bounded organelle;nuclear part;nucleo…	Insulin signaling pathway;mTOR signaling pathway;Ribosome	3D-structure;Acetylation;Completeproteome;Directproteinsequencing;Phosphoprotein;Polymorphism;Referenceproteome;Ribonucleoprotein;Ribosomalprotein	40S ribosomal subunit, cytoplasmic;Nop56p-associated pre-rRNA complex;Ribosome, cytoplasmic	PS00578	RIBOSOMAL_S6E	0.913661	1.75946e-06	102.39	81.733	65.855	-0.91531	888490000	0.0309081	0.320124	0.297256	P62753
1.11266	0.936006	0.967305	1.10802	1.17895	1.00376	0.957125	1.12248	0.910745	1.00379	0.951162	0.959476	0.967267	0.999032	0.974095	1.03115	1.11248	0.997527	1.10847	1.0197	1.05838	0.931476	0.986811	0.966049	S	594	2	___1	Casein kinase II substrate motif	+	CST;HTP	cellular macromolecule metabolic process;cellular metabolic process;cellular nitrogen compound metabolic process;cellular process;macromolecule metabolic process;metabolic process;nitrogen compound metabolic process;nucleic acid metabolic process;nucleobase-containing compound metabolic process;primary metabolic process;RNA metabolic process;RNA secondary structure unwinding	adenyl nucleotide binding;adenyl ribonucleotide binding;ATP binding;ATPase activity;ATPase activity, coupled;ATP-dependent helicase activity;ATP-dependent RNA helicase activity;binding;catalytic activity;helicase activity;hydrolase activity;hydrolase activity, acting on acid anhydrides;hydrolase activity, acting on acid anhydrides, in phosphorus-containing anhydrides;nucleoside-triphosphatase act…	cell part;cytoplasm;intracellular non-membrane-bounded organelle;intracellular organelle;intracellular organelle part;intracellular part;membrane;non-membrane-bounded organelle;nuclear part;nucleolus;organelle;organelle part		Alternativesplicing;ATP-binding;Completeproteome;Helicase;Hydrolase;Nucleotide-binding;Phosphoprotein;Polymorphism;Referenceproteome;RNA-binding		PS00039;PS51192;PS51194;PS51195	DEAD_ATP_HELICASE;HELICASE_ATP_BIND_1;HELICASE_CTER;Q_MOTIF	1	1.2213e-12	175.49	164.33	175.49	0.80836	175410000	0.119734	0.905153	0.297421	Q8NHQ9
0.948937	1.01187	1.02956	0.984872	0.947517	0.989768	1.0163	0.929934	1.09175	1.00958	0.98639	1.03303	1.06119	0.995977	0.996808	1.05976	1.03043	1.06529	0.884136	0.956323	1.03005	1.11365	0.992368	1.00589	S	638	3	___1	Casein kinase II substrate motif;ERK1,2 kinase substrate motif;GSK-3, ERK1, ERK2, CDK5 substrate motif;PKA kinase substrate motif;PKC kinase substrate motif;Pyruvate dehydrogenase kinase substrate motif;WW domain binding motif	+	HTP	biological regulation;biosynthetic process;cellular biosynthetic process;cellular component organization;cellular component organization at cellular level;cellular component organization or biogenesis;cellular component organization or biogenesis at cellular level;cellular macromolecule biosynthetic process;cellular macromolecule metabolic process;cellular metabolic process;cellular nitrogen comp…	binding;chromatin binding;DNA binding;nucleic acid binding	cell part;intracellular non-membrane-bounded organelle;intracellular organelle;intracellular organelle part;intracellular part;non-membrane-bounded organelle;nuclear part;nucleolus;nucleoplasm;organelle;organelle part		3D-structure;Acetylation;Activator;Alternativesplicing;Completeproteome;DNA-binding;Nucleus;Phosphoprotein;Referenceproteome;Repeat;Transcription;Transcriptionregulation		PS50118	HMG_BOX_2	0.999062	4.67378e-05	107.46	90.439	107.46	-0.1851	137230000	0.220287	0.66858	0.300375	P17480
1.05216	1.00254	1.02399	1.03808	1.07194	1.03509	1.02172	1.04559	0.938514	0.941892	1.0031	1.00177	0.991837	0.955437	1.00864	1.0093	1.03347	1.02148	1.03784	1.08198	0.952042	1.05147	1.04257	1.083	S	428	3	___1	14-3-3 domain binding motif;Aurora-A kinase substrate motif;Calmodulin-dependent protein kinase II substrate motif;Casein kinase II substrate motif;DNA dependent Protein kinase substrate motif;MAPKAPK2 kinase substrate motif;PAK2 kinase substrate motif;Phosphorylase kinase substrate motif;PKA kinase substrate motif;PKC epsilon kinase substrate motif;PKC kinase substrate motif	+	HTP	activation of MAPK activity;activation of MAPKK activity;activation of protein kinase activity;anatomical structure development;anatomical structure formation involved in morphogenesis;anatomical structure morphogenesis;anterior/posterior axis specification;anterior/posterior axis specification, embryo;axis specification;biological regulation;branching involved in prostate gland morphogenesis;car…	binding;binding, bridging;cytokine receptor binding;enzyme activator activity;enzyme regulator activity;fibroblast growth factor receptor binding;growth factor receptor binding;neurotrophin receptor binding;neurotrophin TRK receptor binding;neurotrophin TRKA receptor binding;phosphatase activator activity;phosphatase regulator activity;protein binding;protein binding, bridging;receptor binding;re…	cell junction;cell part;cell-cell junction;cytoplasmic part;endosome;integral to membrane;integral to plasma membrane;intracellular membrane-bounded organelle;intracellular organelle;intracellular part;intrinsic to membrane;intrinsic to plasma membrane;membrane;membrane part;membrane-bounded organelle;organelle;plasma membrane;plasma membrane part	Neurotrophin signaling pathway	3D-structure;Completeproteome;Lipoprotein;Membrane;Myristate;Phosphoprotein;Polymorphism;Referenceproteome;Ublconjugation		PS51064	IRS_PTB	1	6.30729e-10	139.02	118.65	46.819	-0.54323	306960000	0.00467834	0.871748	0.300544	Q8WU20
0.967106	0.99745	1.01519	1.02578	0.998224	1.02079	1.00938	0.972928	1.00677	0.975922	0.98728	1.01825	1.03831	0.987684	0.999925	1.0472	1.02193	1.02194	0.899845	1.04862	1.08049	1.09666	1.00424	1.03219	S	299	5	___1	14-3-3 domain binding motif;AMP-activated protein kinase substrate motif;Calmodulin-dependent protein kinase I substrate motif;Calmodulin-dependent protein kinase II substrate motif;Calmodulin-dependent protein kinase IV substrate motif;Casein kinase II substrate motif;Chk1 kinase substrate motif;G protein-coupled receptor kinase 1 substrate motif;HMGCoA Reductase kinase substrate motif;PKA kinas…	+	CST;HTP		binding;carbohydrate binding;glycosaminoglycan binding;hyaluronic acid binding;pattern binding;polysaccharide binding	adherens junction;anchoring junction;cell junction;cell part;cell projection;cell surface;cell-substrate adherens junction;cell-substrate junction;focal adhesion;integral to membrane;intrinsic to membrane;membrane part;ruffle		Alternativesplicing;Completeproteome;Disulfidebond;Glycoprotein;Lectin;Membrane;Phosphoprotein;Polymorphism;Referenceproteome;Repeat;Signal;Transmembrane;Transmembranehelix		PS50041	C_TYPE_LECTIN_2	0.999987	1.02495e-19	184.84	152.45	94.632	-1.1905	405940000	0.482268	0.145917	0.30072	Q6UX15
1.02465	1.014	1.01472	1.00935	1.05569	1.0244	1.00106	1.05199	0.993375	0.991481	0.999141	1.02166	1.03924	0.994547	1.01402	1.03926	1.06644	1.01188	0.962661	0.986189	1.0988	1.07491	1.02395	1.02357	S	108	2	___1	ERK1,2 kinase substrate motif;GSK-3, ERK1, ERK2, CDK5 substrate motif;PKA kinase substrate motif;WW domain binding motif	+	CST;HTP			cell part;cytoplasmic part;endosome;intracellular membrane-bounded organelle;intracellular organelle;intracellular part;membrane;membrane-bounded organelle;mitochondrion;organelle		Alternativesplicing;Completeproteome;Endosome;Phosphoprotein;Referenceproteome				1	1.10486e-08	162.26	123.62	162.26	-0.087397	1766300000	0.365375	0.0184965	0.301059	Q9NX40
0.971743	1.00631	1.01773	1.02811	1.00994	1.03901	1.02783	1.0159	1.06086	1.00366	0.975692	1.01917	1.0203	1.00355	1.00936	1.02708	1.0392	1.03008	1.0119	1.12194	1.0344	1.03475	0.98729	1.06578	S	403	3	___1	Casein kinase I substrate motif;Casein kinase II substrate motif;PKA kinase substrate motif;PKC kinase substrate motif	+	CST;HTP			cell part;cytoplasm;intracellular part		3D-structure;Alternativesplicing;ANKrepeat;Completeproteome;Cytoplasm;Phosphoprotein;Polymorphism;Referenceproteome;Repeat;SH3domain		PS50002;PS50088;PS50105;PS50297	ANK_REP_REGION;ANK_REPEAT;SAM_DOMAIN;SH3	0.99958	6.37393e-70	264.55	242.33	203.75	-0.55524	130840000	0.281035	0.702415	0.301087	Q8WXE0
0.967788	1.0364	1.11837	1.09345	0.96275	1.00839	1.07905	1.02396	1.05833	1.02636	1.02048	1.02384	0.99009	1.01539	1.04861	1.04094	1.00607	1.07107	0.97811	0.847282	1.02861	0.989378	1.07902	0.972831	S	286	3	___1	Casein kinase II substrate motif;PKA kinase substrate motif;PKC kinase substrate motif					cell part;intracellular part;macromolecular complex;protein complex;tRNA-splicing ligase complex		Alternativesplicing;Completeproteome;Referenceproteome				0.993776	0.00188275	77.062	51.845	77.062	0.17097	46628000	0.44936	0.881127	0.301216	Q8NCA5
0.970278	0.98538	1.03554	0.994178	1.04876	0.994766	1.0209	0.979245	1.03616	1.00028	0.990328	0.993062	1.04396	0.963302	0.99173	1.01608	1.07394	1.05207	1.02939	1.01868	1.05419	0.966689	1.00377	1.00303	S	2454	2	___1	Casein kinase II substrate motif;G protein-coupled receptor kinase 1 substrate motif	+	CST;HTP	biological regulation;biosynthetic process;carbohydrate metabolic process;carbohydrate transport;cell cycle;cell cycle process;cell surface receptor linked signaling pathway;cellular biosynthetic process;cellular component disassembly;cellular component disassembly at cellular level;cellular component organization;cellular component organization at cellular level;cellular component organization o…	binding;catalytic activity;cation binding;cis-trans isomerase activity;enzyme binding;GTPase binding;ion binding;isomerase activity;ligase activity;metal ion binding;nucleic acid binding;peptidyl-prolyl cis-trans isomerase activity;protein binding;Ran GTPase binding;Ras GTPase binding;RNA binding;small GTPase binding;transition metal ion binding;zinc ion binding	cell part;cytoplasm;cytoplasmic part;cytosol;inclusion body;intracellular membrane-bounded organelle;intracellular organelle;intracellular organelle part;intracellular part;macromolecular complex;membrane;membrane part;membrane-bounded organelle;mitochondrion;nuclear inclusion body;nuclear membrane;nuclear part;nuclear pore;organelle;organelle membrane;organelle part;pore complex;protein complex	RNA transport	3D-structure;Acetylation;Alternativesplicing;Coiledcoil;Completeproteome;Cytoplasm;Disulfidebond;Isopeptidebond;Ligase;Membrane;Metal-binding;mRNAtransport;Nuclearporecomplex;Nucleus;Phosphoprotein;Polymorphism;Proteintransport;Referenceproteome;Repeat;RNA-binding;TPRrepeat;Translocation;Transport;Ublconjugation;Ublconjugationpathway;Zinc;Zinc-finger	Nuclear pore complex	PS00170;PS01358;PS50005;PS50072;PS50196;PS50199;PS50293;PS50913	CSA_PPIASE_1;CSA_PPIASE_2;GRIP;RANBD1;TPR;TPR_REGION;ZF_RANBP2_1;ZF_RANBP2_2	0.99998	0.00032099	92.112	74.303	92.112	-0.13479	42982000	0.237005	0.569634	0.301733	P49792;Q7Z3J3;A6NKT7;P0DJD0;P0DJD1;Q99666;O14715
0.967743	1.01931	1.01666	1.01478	1.0162	1.04004	1.01336	0.966909	0.971725	0.960812	0.982951	1.04822	1.00277	0.969046	1.00331	1.06593	1.0658	1.01399	1.13217	0.94072	1.0447	0.857914	1.0062	0.997692	S	304	2	___1	ERK1,2 kinase substrate motif;G protein-coupled receptor kinase 1 substrate motif;Growth associated histone HI kinase substrate motif;GSK-3, ERK1, ERK2, CDK5 substrate motif;PKA kinase substrate motif;PKC kinase substrate motif;WW domain binding motif	+	HTP	anatomical structure development;developmental process;multicellular organismal process;muscle contraction;muscle organ development;muscle structure development;muscle system process;organ development;smooth muscle contraction;system process	actin binding;binding;cytoskeletal protein binding;protein binding;structural constituent of muscle;structural molecule activity	actin cytoskeleton;cell part;cytoplasm;cytoskeleton;intracellular non-membrane-bounded organelle;intracellular organelle;intracellular organelle part;intracellular part;non-membrane-bounded organelle;nuclear part;nucleoplasm;organelle;organelle part		3D-structure;Acetylation;Alternativepromoterusage;Alternativesplicing;Coiledcoil;Completeproteome;Cytoplasm;Cytoskeleton;Phosphoprotein;Polymorphism;Referenceproteome		PS50021	CH	0.999999	5.40848e-10	142.91	121.1	124.95	-0.37629	127570000	0.95615	0.6003	0.304649	P53814
0.958497	1.00107	1.01546	1.0294	0.990939	1.02759	1.01198	0.973866	1.05788	0.991249	0.97674	1.03655	1.02402	1.01282	0.999402	1.05954	1.11581	1.01821	0.923529	1.04478	1.15979	1.15721	0.999099	1.0331	T	116	3	___1	Dual specificity protein phosphatase 1 substrate motif;Dual specificity protein phosphatase 6 substrate motif;ERK1 kinase substrate motif;G protein-coupled receptor kinase 1 substrate motif;MAPK 11,13,14 kinase substrate motif;PKA kinase substrate motif;PP2C delta substrate motif	+	CST;HTP	apoptosis;biological regulation;cell death;cell differentiation;cellular developmental process;cellular process;death;developmental process;muscle cell differentiation;negative regulation of apoptosis;negative regulation of biological process;negative regulation of cell death;negative regulation of cellular process;negative regulation of programmed cell death;positive regulation of biological pro…	binding;calcium ion binding;cation binding;enzyme activator activity;enzyme regulator activity;GTPase activator activity;GTPase regulator activity;identical protein binding;ion binding;metal ion binding;nucleoside-triphosphatase regulator activity;protein binding	cell part;cytoplasm;cytoplasmic part;cytosol;envelope;intracellular membrane-bounded organelle;intracellular organelle;intracellular organelle part;intracellular part;membrane-bounded organelle;nuclear envelope;nuclear part;organelle;organelle envelope;organelle part;perinuclear region of cytoplasm		Alternativesplicing;Apoptosis;Completeproteome;Cytoplasm;Phosphoprotein;Polymorphism;Referenceproteome	BNIP2-ARHGAP8 complex	PS50191	CRAL_TRIO	0.813956	6.16843e-22	221.59	157.36	152.25	-0.48653	2043500000	0.119846	0.293114	0.305254	Q12982
0.96689	1.00422	1.02456	1.00309	1.00751	1.02141	1.02337	0.988595	0.914962	0.959164	1.01754	1.02095	0.990675	0.939787	1.00562	1.02887	1.02492	1.03801	0.984005	0.937966	1.12364	1.04181	1.02819	1.03629	S	1436	3	___1	14-3-3 domain binding motif;Calmodulin-dependent protein kinase II substrate motif;Calmodulin-dependent protein kinase IV substrate motif;Casein kinase II substrate motif;Chk1 kinase substrate motif;DNA dependent Protein kinase substrate motif;PKA kinase substrate motif;PKC kinase substrate motif	+	CST;HTP	cellular macromolecule metabolic process;cellular metabolic process;cellular nitrogen compound metabolic process;cellular process;macromolecule metabolic process;metabolic process;mRNA metabolic process;mRNA processing;nitrogen compound metabolic process;nuclear mRNA splicing, via spliceosome;nucleic acid metabolic process;nucleobase-containing compound metabolic process;primary metabolic process…	binding;C2H2 zinc finger domain binding;protein binding;protein domain specific binding;protein N-terminus binding	Cajal body;catalytic step 2 spliceosome;cell part;intracellular organelle part;intracellular part;macromolecular complex;nuclear body;nuclear part;nuclear speck;nucleoplasm;nucleoplasm part;organelle part;ribonucleoprotein complex;spliceosomal complex		Acetylation;Alternativesplicing;Coiledcoil;Completeproteome;Directproteinsequencing;mRNAprocessing;mRNAsplicing;Nucleus;Phosphoprotein;Polymorphism;Referenceproteome;RNA-binding;Spliceosome	C complex spliceosome;Spliceosome;SRm160/300 complex;SRm160-SRm300 complex			0.937434	0.000740373	78.964	39.086	43.282	-0.53885	10755000000	0.160767	0.118956	0.305923	Q9UQ35
0.951797	0.994724	1.01173	1.01982	0.991273	1.00307	1.00496	0.948155	1.05541	1.0024	0.98668	1.04404	1.02277	1.01161	1.00241	1.06574	0.995117	1.03791	1.00304	0.867052	1.01119	1.12621	0.987596	0.971629	S	344	2	___1	ERK1,2 kinase substrate motif;Growth associated histone HI kinase substrate motif;GSK-3, ERK1, ERK2, CDK5 substrate motif;WW domain binding motif	+	CST;HTP	cell cycle phase;cell cycle process;cell division;cellular component organization;cellular component organization at cellular level;cellular component organization or biogenesis;cellular component organization or biogenesis at cellular level;cellular macromolecule metabolic process;cellular metabolic process;cellular process;cellular protein metabolic process;macromolecule metabolic process;macro…	binding;cation binding;enzyme binding;ion binding;kinase binding;metal ion binding;protein binding;protein kinase binding;transition metal ion binding;zinc ion binding	cell part;intracellular membrane-bounded organelle;intracellular organelle;intracellular organelle part;intracellular part;membrane;membrane-bounded organelle;nuclear membrane;nuclear part;nucleus;organelle;organelle membrane;organelle part		Acetylation;Alternativesplicing;Cellcycle;Celldivision;Completeproteome;Metal-binding;Mitosis;Nucleus;Phosphoprotein;Polymorphism;Referenceproteome;Ublconjugationpathway;Zinc;Zinc-finger	Ubiquitin E3 ligase (NIPA, SKP1A, CUL1, RBX1)			0.999999	5.72094e-48	232.37	201.1	92.732	0.39493	447520000	0.39173	0.364995	0.308549	Q86WB0
0.953056	1.00242	1.02806	0.983824	0.990664	1.02174	1.0236	0.998612	0.966104	0.986588	0.996018	0.954093	1.01388	0.979077	1.01175	0.966331	1.10393	1.0225	1.09278	1.0185	1.08676	0.94587	1.03798	0.997357	S	568	3	___1	b-Adrenergic Receptor kinase substrate motif;ERK1,2 kinase substrate motif;Growth associated histone HI kinase substrate motif;GSK-3, ERK1, ERK2, CDK5 substrate motif;PKA kinase substrate motif;PKC kinase substrate motif;WW domain binding motif	+	CST;HTP	biological regulation;cell junction assembly;cell junction organization;cell surface receptor linked signaling pathway;cell-cell junction assembly;cell-cell junction organization;cellular component assembly;cellular component assembly at cellular level;cellular component organization;cellular component organization at cellular level;cellular component organization or biogenesis;cellular component…	binding;double-stranded RNA binding;NF-kappaB binding;nucleic acid binding;protein binding;protein binding transcription factor activity;RNA binding;RNA polymerase II transcription factor binding;transcription coactivator activity;transcription cofactor activity;transcription factor binding;transcription factor binding transcription factor activity	apical plasma membrane;cell junction;cell part;cell-cell junction;cytoplasm;cytoplasmic part;endoplasmic reticulum;endoplasmic reticulum membrane;endoplasmic reticulum part;integral to membrane;intercellular canaliculus;intracellular membrane-bounded organelle;intracellular non-membrane-bounded organelle;intracellular organelle;intracellular organelle part;intracellular part;intrinsic to membrane…		3D-structure;Acetylation;Celljunction;Completeproteome;Cytoplasm;Endoplasmicreticulum;Membrane;Nucleus;Phosphoprotein;Polymorphism;Referenceproteome;Tightjunction;Transmembrane;Transmembranehelix				1	2.93587e-07	191.48	155.52	131.82	-0.014305	2602800000	0.0171118	0.894976	0.308699	Q86UE4
1.02567	1.01807	1.02058	1.01534	1.03087	1.02204	1.01685	0.998285	1.08494	1.00544	0.980547	0.987108	1.04085	1.01208	1.0089	1.01137	1.07277	1.0628	0.957465	1.04833	1.08565	1.17506	1.02241	1.0159	S	275	3	___1	Casein kinase II substrate motif;ERK1,2 kinase substrate motif;G protein-coupled receptor kinase 1 substrate motif;Growth associated histone HI kinase substrate motif;GSK-3, ERK1, ERK2, CDK5 substrate motif;MAPKAPK2 kinase substrate motif;WW domain binding motif	+	HTP	activation of phospholipase C activity;activation of phospholipase C activity by G-protein coupled receptor protein signaling pathway coupled to IP3 second messenger;associative learning;behavior;biological regulation;cell chemotaxis;cell migration;cell motility;cell surface receptor linked signaling pathway;cellular component movement;cellular process;cellular response to amine stimulus;cellular…	amine binding;binding;G-protein coupled amine receptor activity;G-protein coupled receptor activity;histamine binding;histamine receptor activity;molecular transducer activity;receptor activity;signal transducer activity;signaling receptor activity;transmembrane signaling receptor activity	cell part;cytoplasm;integral to membrane;integral to plasma membrane;intracellular organelle part;intracellular part;intrinsic to membrane;intrinsic to plasma membrane;membrane;membrane part;nuclear part;nucleoplasm;organelle part;plasma membrane;plasma membrane part	Calcium signaling pathway;Neuroactive ligand-receptor interaction	3D-structure;Cellmembrane;Completeproteome;Disulfidebond;Glycoprotein;G-proteincoupledreceptor;Membrane;Phosphoprotein;Polymorphism;Receptor;Referenceproteome;Transducer;Transmembrane;Transmembranehelix		PS00237;PS50262	G_PROTEIN_RECEP_F1_1;G_PROTEIN_RECEP_F1_2	0.988577	3.74347e-16	164.99	146.58	164.99	0.30757	268600000	0.0940496	0.381704	0.308824	P35367
1.05906	1.03814	0.998737	1.03924	1.06908	0.998377	1.02591	1.03921	0.901797	0.960155	1.03054	0.978695	0.942766	0.964504	0.999268	0.970051	1.05289	1.0224	1.02954	0.856604	1.04014	1.1461	1.01732	0.933406	S	429	4	___1	Casein kinase II substrate motif;MDC1 BRCT domain binding motif;PKA kinase substrate motif;PKC kinase substrate motif;Plk1 PBD domain binding motif	+	HTP	anatomical structure development;apoptosis;biological regulation;cardiac cell development;cardiac muscle cell development;cell cycle;cell cycle process;cell death;cell development;cellular component disassembly;cellular component disassembly at cellular level;cellular component disassembly involved in apoptosis;cellular component organization;cellular component organization at cellular level;cell…	structural molecule activity	cell part;cytoplasm;cytoplasmic part;cytoskeletal part;cytosol;envelope;intermediate filament;intracellular membrane-bounded organelle;intracellular organelle;intracellular organelle part;intracellular part;lamin filament;macromolecular complex;membrane;membrane-bounded organelle;nuclear body;nuclear envelope;nuclear lamina;nuclear membrane;nuclear part;nuclear speck;nucleoplasm;nucleoplasm part;…	Arrhythmogenic right ventricular cardiomyopathy (ARVC);Dilated cardiomyopathy;Hypertrophic cardiomyopathy (HCM)	3D-structure;Acetylation;Alternativesplicing;Cardiomyopathy;Charcot-Marie-Toothdisease;Coiledcoil;Completeproteome;Congenitalmusculardystrophy;Directproteinsequencing;Diseasemutation;Emery-Dreifussmusculardystrophy;Intermediatefilament;Isopeptidebond;Limb-girdlemusculardystrophy;Lipoprotein;Methylation;Neurodegeneration;Neuropathy;Nucleus;Phosphoprotein;Polymorphism;Prenylation;Referenceproteome;…	CTCF-nucleophosmin-PARP-HIS-KPNA-LMNA-TOP complex;Emerin architectural complex;Emerin complex 24	PS00226	IF	0.810628	1.78389e-16	171.35	152.32	115.15	-0.45134	173700000	0.0571007	0.3367	0.309093	P02545
0.96432	1.01568	1.02518	0.995459	0.996696	0.995217	1.01643	0.986432	1.01968	0.981807	0.994567	0.968285	0.998711	0.972407	1.0031	0.99017	1.0443	1.07282	1.02289	0.973106	1.10179	1.07222	1.02618	0.985074	S	211	2	___1	ERK1,2 kinase substrate motif;GSK-3, ERK1, ERK2, CDK5 substrate motif;WW domain binding motif	+	HTP	biological regulation;catabolic process;cellular catabolic process;cellular chemical homeostasis;cellular homeostasis;cellular ion homeostasis;cellular macromolecule catabolic process;cellular macromolecule metabolic process;cellular metabolic process;cellular process;cellular protein metabolic process;chemical homeostasis;entry into cell of other organism involved in symbiotic interaction;entry …	acid-amino acid ligase activity;binding;catalytic activity;ligase activity;ligase activity, forming carbon-nitrogen bonds;protein binding;RNA polymerase II transcription factor binding;small conjugating protein ligase activity;transcription factor binding;ubiquitin-protein ligase activity	cell part;cytoplasm;extracellular membrane-bounded organelle;extracellular organelle;extracellular region part;extracellular vesicular exosome;intracellular membrane-bounded organelle;intracellular organelle;intracellular part;macromolecular complex;membrane;membrane-bounded organelle;membrane-bounded vesicle;nucleus;organelle;protein complex;ubiquitin ligase complex;vesicle	Ubiquitin mediated proteolysis	Alternativesplicing;Completeproteome;Host-virusinteraction;Ligase;Nucleus;Phosphoprotein;Referenceproteome;Repeat;Ublconjugation;Ublconjugationpathway		PS01159;PS50020;PS50237	HECT;WW_DOMAIN_1;WW_DOMAIN_2	1	5.40252e-17	202.24	172.1	192.35	-0.383	997700000	0.00343278	0.496427	0.310197	O00308
0.99677	1.01632	1.02061	0.99975	1.02014	1.03832	1.02653	1.02259	1.04346	0.996125	0.988474	0.996711	1.0016	0.985931	1.00648	0.99869	1.07003	1.03887	1.01719	0.99617	1.04007	0.981427	1.02962	0.981078	S	1784	2	___1	ERK1,2 kinase substrate motif;G protein-coupled receptor kinase 1 substrate motif;GSK3 kinase substrate motif;GSK-3, ERK1, ERK2, CDK5 substrate motif;MAPKAPK2 kinase substrate motif;WW domain binding motif	+	CST;HTP	biological regulation;cell activation;cell activation involved in immune response;cell chemotaxis;cell migration;cell motility;cellular component disassembly;cellular component disassembly at cellular level;cellular component movement;cellular component organization;cellular component organization at cellular level;cellular component organization or biogenesis;cellular component organization or b…	ARF guanyl-nucleotide exchange factor activity;binding;enzyme regulator activity;GTPase regulator activity;guanyl-nucleotide exchange factor activity;lipid binding;nucleoside-triphosphatase regulator activity;phosphatidylinositol binding;phosphatidylinositol-3,4,5-trisphosphate binding;phosphatidylinositol-3,5-bisphosphate binding;phospholipid binding;small GTPase regulator activity	cell leading edge;cell part;cis-Golgi network;cytoplasmic part;endoplasmic reticulum lumen;endoplasmic reticulum part;endoplasmic reticulum-Golgi intermediate compartment;Golgi apparatus;Golgi apparatus part;Golgi membrane;Golgi stack;intracellular membrane-bounded organelle;intracellular organelle;intracellular organelle lumen;intracellular organelle part;intracellular part;lipid particle;membra…		Alternativesplicing;Completeproteome;Cytoplasm;Golgiapparatus;Guanine-nucleotidereleasingfactor;Host-virusinteraction;Lipid-binding;Lipiddroplet;Membrane;Phosphoprotein;Polymorphism;Proteintransport;Referenceproteome;Transport		PS50190	SEC7	0.998744	2.12755e-38	250.88	235.49	215.93	-0.45037	218390000	0.136447	0.8873	0.310818	Q92538
0.973018	1.03571	1.07784	1.03714	0.992387	1.0201	1.03579	1.00424	1.04781	1.02365	1.01399	0.995794	0.979617	1.03037	1.04327	1.01382	1.02311	1.07766	0.933706	0.928217	1.02736	1.1752	0.966836	0.976972	S	105	3	___1	14-3-3 domain binding motif;Calmodulin-dependent protein kinase II substrate motif;Calmodulin-dependent protein kinase IV substrate motif;Casein kinase II substrate motif;Chk1 kinase substrate motif;G protein-coupled receptor kinase 1 substrate motif;PKA kinase substrate motif;PKC epsilon kinase substrate motif;PKC kinase substrate motif;Pyruvate dehydrogenase kinase substrate motif	+	CST;HTP	biosynthetic process;cellular biosynthetic process;cellular macromolecule biosynthetic process;cellular macromolecule metabolic process;cellular metabolic process;cellular process;cellular protein metabolic process;cotranslational protein targeting to membrane;establishment of localization;establishment of localization in cell;establishment of protein localization;establishment of protein localiz…		cell part;cytoplasmic part;endoplasmic reticulum part;integral to endoplasmic reticulum membrane;integral to membrane;integral to organelle membrane;intracellular organelle part;intracellular part;intrinsic to endoplasmic reticulum membrane;intrinsic to membrane;intrinsic to organelle membrane;macromolecular complex;membrane part;organelle part;protein complex;Sec61 translocon complex;translocon …	Protein processing in endoplasmic reticulum	Alternativesplicing;Completeproteome;Endoplasmicreticulum;Membrane;Phosphoprotein;Referenceproteome;Transmembrane;Transmembranehelix	Oligosaccharyltransferase OSTC-III;Translocon-associated protein (TRAP) complex;Translocon-associated protein complex (TRAP complex)			1	0.000727132	96.009	78.145	81.565	0.021223	15141000000	0.989948	0.590672	0.311581	Q9UNL2
0.97734	1.02286	1.04418	1.02008	1.00393	1.01639	1.03138	0.988948	1.04407	1.00633	1.00768	1.02048	1.0057	1.00983	1.01794	1.03238	1.03709	1.04412	0.953816	0.936787	1.05225	1.06566	0.986026	0.984514	S	77	3	___1	b-Adrenergic Receptor kinase substrate motif;Cdc2 kinase substrate motif;CDK kinase substrate motif;CDK1,2,4,6 kinase substrate motif;ERK1,2 kinase substrate motif;GSK-3, ERK1, ERK2, CDK5 substrate motif;PKA kinase substrate motif;PKC kinase substrate motif;WW domain binding motif	+	CST;HTP			cell part;intracellular non-membrane-bounded organelle;intracellular organelle;intracellular organelle part;intracellular part;non-membrane-bounded organelle;nuclear part;nucleolus;organelle;organelle part	Ribosome biogenesis in eukaryotes	Completeproteome;Nucleus;Phosphoprotein;Referenceproteome;Repeat;WDrepeat		PS50082;PS50294	WD_REPEATS_2;WD_REPEATS_REGION	1	0.000165399	123.01	88.312	51.875	0.67549	10789000000	0.904917	0.485713	0.311912	Q15061
0.989054	1.00243	1.01438	1.01515	1.03259	1.01616	1.00797	1.01919	1.01975	1.00564	0.981008	0.98446	1.01885	1.00025	1.00698	1.0049	1.0518	0.983493	1.07802	1.11145	1.05566	1.03436	0.99873	1.07331	S	458	4	___1	14-3-3 domain binding motif;Akt kinase substrate motif;Calmodulin-dependent protein kinase II substrate motif;Casein kinase II substrate motif;MAPKAPK1 kinase substrate motif;PKA kinase substrate motif;PKC kinase substrate motif;Pyruvate dehydrogenase kinase substrate motif	+	CST;HTP	anatomical structure development;apoptosis;biological regulation;cardiac cell development;cardiac muscle cell development;cell cycle;cell cycle process;cell death;cell development;cellular component disassembly;cellular component disassembly at cellular level;cellular component disassembly involved in apoptosis;cellular component organization;cellular component organization at cellular level;cell…	structural molecule activity	cell part;cytoplasm;cytoplasmic part;cytoskeletal part;cytosol;envelope;intermediate filament;intracellular membrane-bounded organelle;intracellular organelle;intracellular organelle part;intracellular part;lamin filament;macromolecular complex;membrane;membrane-bounded organelle;nuclear body;nuclear envelope;nuclear lamina;nuclear membrane;nuclear part;nuclear speck;nucleoplasm;nucleoplasm part;…	Arrhythmogenic right ventricular cardiomyopathy (ARVC);Dilated cardiomyopathy;Hypertrophic cardiomyopathy (HCM)	3D-structure;Acetylation;Alternativesplicing;Cardiomyopathy;Charcot-Marie-Toothdisease;Coiledcoil;Completeproteome;Congenitalmusculardystrophy;Directproteinsequencing;Diseasemutation;Emery-Dreifussmusculardystrophy;Intermediatefilament;Isopeptidebond;Limb-girdlemusculardystrophy;Lipoprotein;Methylation;Neurodegeneration;Neuropathy;Nucleus;Phosphoprotein;Polymorphism;Prenylation;Referenceproteome;…	CTCF-nucleophosmin-PARP-HIS-KPNA-LMNA-TOP complex;Emerin architectural complex;Emerin complex 24	PS00226	IF	0.999813	2.91451e-13	153.97	136.55	117.74	-0.35346	1031300000	0.0210969	0.866027	0.313412	P02545
0.924599	0.997533	1.00775	0.996201	0.942361	0.989211	1.00897	0.939377	1.04023	0.977802	0.996297	1.05121	1.03786	0.967413	1.00216	1.0555	1.04326	1.03745	0.914928	1.02348	1.04902	1.11977	1.01446	1.08404	S	2020	4	___1	BARD1 BRCT domain binding motif;Casein kinase II substrate motif	+	CST;HTP	actin cytoskeleton organization;actin filament-based process;actomyosin structure organization;asymmetric Golgi ribbon formation;biological regulation;cell migration;cell motility;cellular component movement;cellular component organization;cellular component organization at cellular level;cellular component organization or biogenesis;cellular component organization or biogenesis at cellular level…	actin binding;actin filament binding;adenyl nucleotide binding;adenyl ribonucleotide binding;ADP binding;ATP binding;binding;catalytic activity;cytoskeletal protein binding;DNA binding;hydrolase activity;hydrolase activity, acting on acid anhydrides;hydrolase activity, acting on acid anhydrides, in phosphorus-containing anhydrides;motor activity;nucleic acid binding;nucleoside-triphosphatase acti…	actomyosin;cell part;cytoplasmic part;cytoskeletal part;endoplasmic reticulum-Golgi intermediate compartment;Golgi apparatus part;Golgi membrane;intracellular membrane-bounded organelle;intracellular organelle;intracellular organelle part;intracellular part;macromolecular complex;membrane;membrane-bounded organelle;myosin complex;organelle;organelle membrane;organelle part;protein complex;trans-G…		Alternativesplicing;ATP-binding;Coiledcoil;Completeproteome;Cytoplasm;Cytoskeleton;Golgiapparatus;Motorprotein;Myosin;Nucleotide-binding;Phosphoprotein;Polymorphism;Referenceproteome		PS50096;PS50106;PS51456	IQ;MYOSIN_MOTOR;PDZ	0.999953	6.64219e-36	204.89	178.27	204.89	-0.5603	835910000	0.0742735	0.572963	0.313898	Q92614
0.95208	1.00218	1.00895	1.00051	0.99948	1.0182	1.00272	0.979389	1.02013	1.00386	0.976062	1.0009	1.01766	1.00406	1.0033	1.03379	1.07474	1.0015	1.03292	1.00909	1.05965	0.946322	0.994486	0.981694	S	219	2	___1	Casein kinase II substrate motif;DNA dependent Protein kinase substrate motif;ERK1,2 kinase substrate motif;G protein-coupled receptor kinase 1 substrate motif;GSK3 kinase substrate motif;GSK-3, ERK1, ERK2, CDK5 substrate motif;WW domain binding motif	+	HTP		binding;cation binding;enzyme activator activity;enzyme regulator activity;GTPase activator activity;GTPase regulator activity;ion binding;metal ion binding;nucleoside-triphosphatase regulator activity;transition metal ion binding;zinc ion binding	cell part;cytoplasm;intracellular organelle part;intracellular part;nuclear part;nucleoplasm;organelle part	Endocytosis	3D-structure;Alternativesplicing;Completeproteome;Cytoplasm;GTPaseactivation;Metal-binding;Phosphoprotein;Polymorphism;Referenceproteome;Zinc;Zinc-finger		PS50115	ARFGAP	0.992905	5.32313e-21	187.56	153.29	187.56	0.43558	188580000	0.371331	0.899727	0.313963	Q8WU79
0.961668	1.00427	1.04397	0.957639	1.01028	1.02746	1.03691	0.932684	0.986141	0.964889	0.991205	0.994445	1.01869	0.958324	1.02827	1.00102	1.02816	1.01278	1.04942	0.98489	0.986367	0.978691	0.996008	0.896315	S	36	3	___1	14-3-3 domain binding motif;Calmodulin-dependent protein kinase II substrate motif;ERK1,2 kinase substrate motif;GSK-3, ERK1, ERK2, CDK5 substrate motif;PKA kinase substrate motif;PKC kinase substrate motif;WW domain binding motif;ZIP kinase substrate motif	+	CST;HTP	cellular macromolecule metabolic process;cellular metabolic process;cellular nitrogen compound metabolic process;cellular process;macromolecule metabolic process;metabolic process;mRNA metabolic process;mRNA processing;ncRNA 3'-end processing;ncRNA metabolic process;ncRNA processing;nitrogen compound metabolic process;nucleic acid metabolic process;nucleobase-containing compound metabolic process…	3'-5' exonuclease activity;3'-5'-exoribonuclease activity;catalytic activity;exonuclease activity;exonuclease activity, active with either ribo- or deoxyribonucleic acids and producing 5'-phosphomonoesters;exoribonuclease activity;exoribonuclease activity, producing 5'-phosphomonoesters;hydrolase activity;hydrolase activity, acting on ester bonds;nuclease activity;ribonuclease activity	cell part;intracellular membrane-bounded organelle;intracellular organelle;intracellular part;membrane-bounded organelle;nucleus;organelle		3D-structure;Alternativesplicing;Completeproteome;Hydrolase;mRNAprocessing;mRNAsplicing;Nuclease;Nucleus;Polymorphism;Referenceproteome				1	0.00261629	83.862	14.141	79.148	-0.20189	250470000	0.75665	0.965377	0.315437	Q9BQ65
0.954029	0.996697	1.01649	1.06526	1.02744	1.03085	1.00576	1.04194	1.12275	0.984873	0.976033	1.00016	1.05374	0.999034	1.01455	1.02033	1.06233	0.987229	1.04767	1.03079	1.05006	0.926883	0.961536	0.947287	S	1772	3	___1	14-3-3 domain binding motif;Calmodulin-dependent protein kinase II substrate motif;Calmodulin-dependent protein kinase IV substrate motif;Chk1 kinase substrate motif;G protein-coupled receptor kinase 1 substrate motif;PKA kinase substrate motif;PKC kinase substrate motif	+	CST;HTP	anatomical structure formation involved in morphogenesis;cellular macromolecule metabolic process;cellular metabolic process;cellular process;cellular protein metabolic process;developmental process;macromolecule metabolic process;macromolecule modification;metabolic process;neural tube closure;primary metabolic process;protein metabolic process;protein modification by small protein conjugation;p…	acid-amino acid ligase activity;binding;catalytic activity;cation binding;ion binding;ligase activity;ligase activity, forming carbon-nitrogen bonds;metal ion binding;small conjugating protein ligase activity;ubiquitin-protein ligase activity	cell part;cytoplasm;intracellular membrane-bounded organelle;intracellular organelle;intracellular part;membrane-bounded organelle;nucleus;organelle		3D-structure;ANKrepeat;Completeproteome;Ligase;Phosphoprotein;Polymorphism;Referenceproteome;Repeat;Ublconjugationpathway		PS50088;PS50237;PS50297;PS51416	ANK_REP_REGION;ANK_REPEAT;HECT;MIB_HERC2	1	2.04512e-05	88.252	65.817	62.739	-0.25697	193960000	0.874217	0.660544	0.315452	Q9ULT8
0.978444	0.994631	1.0194	1.02943	1.01473	1.00984	1.01438	1.01563	1.04326	0.999638	0.967675	0.986043	1.0242	1.01006	0.990753	1.00969	1.0634	1.024	1.02137	1.02411	1.03949	1.0091	0.984134	0.974762	S	392	3	___1	b-Adrenergic Receptor kinase substrate motif;BARD1 BRCT domain binding motif;Casein kinase I substrate motif;Casein kinase II substrate motif;G protein-coupled receptor kinase 1 substrate motif;GSK3 kinase substrate motif	+	HTP	anatomical structure morphogenesis;cell morphogenesis;cell morphogenesis involved in differentiation;cellular component morphogenesis;cellular component organization;cellular component organization or biogenesis;cellular developmental process;cellular process;developmental process;endothelial cell morphogenesis;epithelial cell morphogenesis	enzyme regulator activity;GTPase regulator activity;guanyl-nucleotide exchange factor activity;nucleoside-triphosphatase regulator activity;Ras guanyl-nucleotide exchange factor activity;Rho guanyl-nucleotide exchange factor activity;small GTPase regulator activity	cell part;cell projection;ruffle	Bacterial invasion of epithelial cells	Alternativepromoterusage;Alternativesplicing;Cellprojection;Completeproteome;Guanine-nucleotidereleasingfactor;Phosphoprotein;Polymorphism;Referenceproteome;SH3domain		PS50002;PS50003;PS50010	DH_2;PH_DOMAIN;SH3	1	4.76967e-22	233.37	191.34	170.56	0.24106	375070000	0.230183	0.868749	0.31547	Q96DR7
0.954683	1.00023	1.00601	1.00352	0.985488	0.996647	1.00294	0.975875	1.0722	1.00691	0.975002	1.01948	1.0213	1.00811	1.00101	1.03751	1.06963	1.03259	0.933112	1.00144	1.12115	1.10716	0.977504	1.00601	S	43	5	___1	Casein kinase II substrate motif;PKA kinase substrate motif;PKC kinase substrate motif	+	CST;HTP	5S class rRNA transcription from RNA polymerase III type 1 promoter;biosynthetic process;cellular biosynthetic process;cellular macromolecule biosynthetic process;cellular macromolecule metabolic process;cellular metabolic process;cellular nitrogen compound metabolic process;cellular process;gene expression;macromolecule biosynthetic process;macromolecule metabolic process;metabolic process;nitro…	binding;DNA binding;nucleic acid binding	cell part;intracellular organelle part;intracellular part;macromolecular complex;nuclear part;nucleoplasm;nucleoplasm part;organelle part;protein complex;transcription factor complex;transcription factor TFIIIC complex		Acetylation;Alternativesplicing;Completeproteome;DNA-binding;Nucleus;Phosphoprotein;Polymorphism;Referenceproteome;Repeat;TPRrepeat;Transcription	5S-DNA-TFIIIA-TFIIIC2 subcomplex;5S-DNA-TFIIIA-TFIIIC2-TFIIIB subcomplex;TFIIIC containing complex;TFIIIC containing complex TFIIIC2;TFIIIC containing-TOP1-SUB1 complex	PS50005;PS50293	TPR;TPR_REGION	1	4.24564e-37	212.07	195.67	144.68	-0.2458	805460000	0.156347	0.404871	0.315938	Q9Y5Q9
0.93272	1.00099	1.01311	0.996971	0.987668	1.00414	1.00137	0.966672	1.09232	0.995615	0.966211	1.01275	1.0433	0.997666	0.987246	1.04597	1.05395	1.03994	0.983946	1.01998	1.05873	1.17587	1.02984	1.01198	T	241	3	___3	Calmodulin-dependent protein kinase II substrate motif;Casein kinase II substrate motif;MDC1 BRCT domain binding motif;PKA kinase substrate motif;PKC kinase substrate motif;Plk1 PBD domain binding motif	+	CST;HTP;LTP	activation-induced cell death of T cells;anatomical structure development;anatomical structure morphogenesis;apoptosis;biological regulation;biosynthetic process;carbohydrate homeostasis;catabolic process;cell activation;cell activation involved in immune response;cell cycle checkpoint;cell cycle phase;cell cycle process;cell death;cell development;cell differentiation;cell proliferation;cell sur…	binding;enzyme binding;kinase binding;protein binding;protein kinase binding;structural constituent of ribosome;structural molecule activity	cell body;cell part;cell projection;cytoplasm;cytoplasmic part;cytosol;cytosolic small ribosomal subunit;dendrite;intracellular membrane-bounded organelle;intracellular non-membrane-bounded organelle;intracellular organelle;intracellular organelle part;intracellular part;macromolecular complex;membrane;membrane-bounded organelle;neuron projection;non-membrane-bounded organelle;nuclear part;nucleo…	Insulin signaling pathway;mTOR signaling pathway;Ribosome	3D-structure;Acetylation;Completeproteome;Directproteinsequencing;Phosphoprotein;Polymorphism;Referenceproteome;Ribonucleoprotein;Ribosomalprotein	40S ribosomal subunit, cytoplasmic;Nop56p-associated pre-rRNA complex;Ribosome, cytoplasmic	PS00578	RIBOSOMAL_S6E	0.96309	8.14214e-10	129.06	114.58	71.853	-0.70565	2082100000	0.0338091	0.324598	0.316478	P62753
1.01512	1.01397	1.01735	1.02707	1.04514	1.03999	1.01856	1.04146	1.03526	1.00385	0.983947	0.967917	1.0171	0.996059	1.00205	0.996233	1.0502	1.06358	0.955335	1.0495	1.07754	1.19521	1.01756	1.02719	S	104	3	___1	Casein kinase II substrate motif;ERK1,2 kinase substrate motif;G protein-coupled receptor kinase 1 substrate motif;GSK-3, ERK1, ERK2, CDK5 substrate motif;WW domain binding motif	+	CST;HTP;LTP	biological regulation;cellular macromolecule metabolic process;cellular metabolic process;cellular nitrogen compound metabolic process;cellular process;gene expression;macromolecule metabolic process;metabolic process;mRNA metabolic process;mRNA processing;nitrogen compound metabolic process;nuclear mRNA splicing, via spliceosome;nucleic acid metabolic process;nucleobase-containing compound metab…	binding;nucleic acid binding;nucleotide binding;poly(U) RNA binding;poly-pyrimidine tract binding;RNA binding;single-stranded RNA binding	catalytic step 2 spliceosome;cell part;intracellular membrane-bounded organelle;intracellular organelle;intracellular organelle part;intracellular part;macromolecular complex;membrane;membrane-bounded organelle;nuclear part;nucleoplasm;nucleus;organelle;organelle part;ribonucleoprotein complex;spliceosomal complex		3D-structure;Acetylation;Completeproteome;Directproteinsequencing;Methylation;mRNAprocessing;mRNAsplicing;Nucleus;Phosphoprotein;Referenceproteome;Repeat;Ribonucleoprotein;RNA-binding;Spliceosome	C complex spliceosome;DCS complex (PTBP1, PTBP2, HNRPH1, HNRPF);DGCR8 multiprotein complex;HNRPF-HNRPH1 complex;Large Drosha complex	PS50102	RRM	1	7.75813e-92	336.71	277.41	183.88	-0.64252	8831400000	0.0391953	0.146908	0.316863	P31943;P55795
0.971288	1.00922	1.02439	0.995176	1.00009	1.01475	1.02008	0.979279	1.07096	0.999611	0.993212	1.0066	1.03165	0.998553	1.00832	1.02048	1.03216	1.03333	0.94812	1.03135	1.04824	1.15501	0.996267	1.02268	S	340	3	___1	Casein kinase II substrate motif;ERK1,2 kinase substrate motif;Growth associated histone HI kinase substrate motif;GSK-3, ERK1, ERK2, CDK5 substrate motif;PKA kinase substrate motif;PKC kinase substrate motif;WW domain binding motif	+	CST;HTP	biological regulation;biosynthetic process;cell cycle phase;cell cycle process;cell division;cellular biosynthetic process;cellular component organization;cellular component organization at cellular level;cellular component organization or biogenesis;cellular component organization or biogenesis at cellular level;cellular macromolecule biosynthetic process;cellular macromolecule metabolic process…	binding;catalytic activity;cyclin-dependent protein kinase activity;enzyme binding;kinase activity;kinase binding;phosphotransferase activity, alcohol group as acceptor;protein binding;protein kinase activity;protein kinase binding;protein serine/threonine kinase activity;RNA polymerase II carboxy-terminal domain kinase activity;transferase activity;transferase activity, transferring phosphorus-c…	cell part;intracellular membrane-bounded organelle;intracellular organelle;intracellular part;membrane-bounded organelle;nucleus;organelle		3D-structure;Alternativesplicing;Cellcycle;Celldivision;Completeproteome;Cyclin;Mitosis;Nucleus;Phosphoprotein;Referenceproteome;Transcription;Transcriptionregulation	P-TEFb.4 complex			1	1.00871e-08	155.37	137.89	88.768	1.2814	4473400000	0.280385	0.360651	0.317181	O75909
0.959681	0.993581	1.01752	1.01024	0.990041	1.0125	1.01116	0.972197	0.955457	0.993621	0.986773	1.0109	0.972076	0.979537	0.979109	1.01686	1.04408	1.0009	1.15139	0.973873	1.04905	0.871149	0.998961	1.0195	S	704	2	___1	Casein kinase II substrate motif;Pyruvate dehydrogenase kinase substrate motif	+	CST;HTP	biological regulation;cellular macromolecule metabolic process;cellular metabolic process;cellular process;cellular protein metabolic process;macromolecule metabolic process;macromolecule modification;metabolic process;primary metabolic process;protein metabolic process;protein modification by small protein conjugation;protein modification by small protein conjugation or removal;protein modificat…	acid-amino acid ligase activity;binding;catalytic activity;cation binding;ion binding;ligase activity;ligase activity, forming carbon-nitrogen bonds;metal ion binding;small conjugating protein ligase activity;transition metal ion binding;ubiquitin-protein ligase activity;zinc ion binding	adherens junction;anchoring junction;cell junction;cell part;cell-substrate adherens junction;cell-substrate junction;cytoplasm;focal adhesion;intracellular membrane-bounded organelle;intracellular organelle;intracellular part;macromolecular complex;membrane-bounded organelle;nucleus;organelle;protein complex;ubiquitin ligase complex	Adherens junction	3D-structure;Acetylation;Alternativesplicing;Completeproteome;LIMdomain;Metal-binding;Phosphoprotein;Polymorphism;Referenceproteome;Zinc	Emerin complex 1;Emerin regulatory complex	PS00478;PS50021;PS50023;PS50106	CH;LIM_DOMAIN_1;LIM_DOMAIN_2;PDZ	0.999898	1.62921e-19	194.53	175.56	181.91	-0.29756	1347100000	0.597137	0.30793	0.317262	Q8WWI1
0.911144	1.02604	1.05193	1.00521	0.949179	1.00701	1.03323	0.964988	1.07485	1.00378	1.00185	1.01158	1.03495	0.999045	1.00783	1.01961	1.05245	1.04118	0.92782	0.983972	1.07722	1.14384	0.975557	1.01306	S	264	3	___1	Casein kinase II substrate motif;PAK2 kinase substrate motif;PKA kinase substrate motif;PKC kinase substrate motif	+	CST;HTP;LTP	aldehyde biosynthetic process;androgen receptor signaling pathway;biological regulation;biosynthetic process;cellular aldehyde metabolic process;cellular biosynthetic process;cellular component organization;cellular component organization at cellular level;cellular component organization or biogenesis;cellular component organization or biogenesis at cellular level;cellular macromolecule biosynthe…	androgen receptor binding;binding;catalytic activity;cation binding;core promoter binding;dioxygenase activity;DNA binding;hormone receptor binding;ion binding;iron ion binding;metal ion binding;nuclear hormone receptor binding;nucleic acid binding;nucleic acid binding transcription factor activity;oxidoreductase activity;protein binding;receptor binding;regulatory region DNA binding;regulatory r…	cell part;cytoplasm;intracellular membrane-bounded organelle;intracellular organelle;intracellular organelle part;intracellular part;membrane;membrane-bounded organelle;nuclear part;nucleoplasm;nucleus;organelle;organelle part		Acetylation;Activator;Chromatinregulator;Completeproteome;Cytoplasm;Differentiation;Dioxygenase;Iron;Metal-binding;Nucleus;Oxidoreductase;Phosphoprotein;Polymorphism;Referenceproteome;Spermatogenesis;Transcription;Transcriptionregulation;Zinc;Zinc-finger		PS51184	JMJC	0.962051	6.91612e-13	166.91	143.43	84.829	-0.0024301	128650000	0.397912	0.591526	0.317279	Q9Y4C1
0.97634	1.02045	1.03448	1.11943	1.01313	1.0431	1.0358	1.00227	1.11164	0.994513	0.96559	1.09898	1.06909	1.0262	1.00635	1.08103	1.10048	1.00226	1.14949	1.11729	1.01551	1.03493	0.996014	0.916607	S	570	3	___1	Casein kinase II substrate motif;MAPKAPK2 kinase substrate motif;MDC1 BRCT domain binding motif;Plk1 PBD domain binding motif	+	CST;HTP;LTP	biological regulation;cellular component organization;cellular component organization or biogenesis;cellular process;cellular response to chemical stimulus;cellular response to endogenous stimulus;cellular response to hormone stimulus;cellular response to insulin stimulus;cellular response to organic substance;cellular response to peptide hormone stimulus;cellular response to stimulus;establishme…	enzyme activator activity;enzyme regulator activity;GTPase activator activity;GTPase regulator activity;nucleoside-triphosphatase regulator activity	cell part;cytoplasm;cytoplasmic part;cytoplasmic vesicle membrane;cytoplasmic vesicle part;extracellular membrane-bounded organelle;extracellular organelle;extracellular region part;extracellular vesicular exosome;intracellular organelle part;intracellular part;membrane;membrane-bounded organelle;membrane-bounded vesicle;organelle;organelle membrane;organelle part;vesicle;vesicle membrane		3D-structure;Acetylation;Alternativesplicing;Completeproteome;Cytoplasm;Diabetesmellitus;GTPaseactivation;Phosphoprotein;Polymorphism;Referenceproteome;Repeat		PS01179;PS50086	PID;TBC_RABGAP	0.950617	1.61327e-15	218.6	172.69	104.81	0.7256	96787000	0.56513	0.205	0.318335	O60343
[truncated: 5,081 more rows]
[truncated: 11 more columns]
